# Supplementary material for: Comprehensive Characterization of 10,571 Mouse Large Intergenic Noncoding RNAs from Whole Transcriptome Sequencing
Source: PLoS One. 2013 Aug 12;8(8):e70835. doi: 10.1371/journal.pone.0070835 (PMC3741367; doi:10.1371/journal.pone.0070835)
Supplement: Dataset S1 — The catalog of 10,571 transcribed lincRNA genes. (BED) [file pone.0070835.s009.bed]

chr1	3063333	3064403	KnowTID_00000001	00001	+	3063333	3064403	0,0,0	1	1070	0
chr1	3670235	3671869	KnowTID_00000002	00002	+	3670235	3671869	0,0,0	1	1634	0
chr1	3742090	3744441	KnowTID_00000385	00251	-	3742090	3744441	0,0,0	1	2351	0
chr1	3974305	3976065	KnowTID_00000386	00252	-	3974305	3976065	0,0,0	2	74,825	0,935
chr1	4105759	4109981	NovelTID_00000215	00141	-	4105759	4109981	0,0,0	3	270,45,45	0,3989,4177
chr1	4486631	4489459	KnowTID_00000003	00003	+	4486631	4489459	0,0,0	1	2828	0
chr1	4573209	4576333	KnowTID_00000387	00253	-	4573209	4576333	0,0,0	2	2457,316	0,2808
chr1	4775858	4776711	KnowTID_00000004	00004	+	4775858	4776711	0,0,0	1	853	0
chr1	4895831	4896942	KnowTID_00000005	00005	+	4895831	4896942	0,0,0	1	1111	0
chr1	5297819	5300098	KnowTID_00000006	00006	+	5297819	5300098	0,0,0	1	2279	0
chr1	5393627	5395659	KnowTID_00000007	00007	+	5393627	5395659	0,0,0	1	2032	0
chr1	5499707	5500214	KnowTID_00000388	00254	-	5499707	5500214	0,0,0	1	507	0
chr1	5832954	5834753	KnowTID_00000389	00255	-	5832954	5834753	0,0,0	1	1799	0
chr1	6396070	6407478	NovelTID_00000216	00142	-	6396070	6407478	0,0,0	2	283,42	0,11366
chr1	6851317	6854232	KnowTID_00000390	00256	-	6851317	6854232	0,0,0	1	2915	0
chr1	7339486	7387950	KnowTID_00000391	00257	-	7339486	7387950	0,0,0	3	985,124,152	0,2365,48312
chr1	7351805	7352932	KnowTID_00000392	00258	-	7351805	7352932	0,0,0	1	1127	0
chr1	7365968	7387950	KnowTID_00000393	00257	-	7365968	7387950	0,0,0	5	120,106,56,197,152	0,4498,6139,7756,21830
chr1	7368767	7371470	KnowTID_00000394	00257	-	7368767	7371470	0,0,0	2	338,2309	0,394
chr1	7372088	7387959	KnowTID_00000395	00257	-	7372088	7387959	0,0,0	2	75,161	0,15710
chr1	7488048	7508230	KnowTID_00000008	00008	+	7488048	7508230	0,0,0	3	495,125,1976	0,2617,18206
chr1	9629335	9630663	KnowTID_00000009	00009	+	9629335	9630663	0,0,0	3	57,441,564	0,318,764
chr1	10772536	10774458	KnowTID_00000396	00259	-	10772536	10774458	0,0,0	1	1922	0
chr1	10870353	10872206	KnowTID_00000010	00010	+	10870353	10872206	0,0,0	3	130,87,23	0,614,1830
chr1	11354006	11357045	KnowTID_00000397	00260	-	11354006	11357045	0,0,0	1	3039	0
chr1	11375834	11377033	KnowTID_00000398	00261	-	11375834	11377033	0,0,0	2	490,164	0,1035
chr1	12657643	12663171	KnowTID_00000011	00011	+	12657643	12663171	0,0,0	3	1530,40,1630	0,3753,3898
chr1	13068526	13068823	KnowTID_00000012	00012	+	13068526	13068823	0,0,0	2	75,137	0,160
chr1	13417527	13419396	KnowTID_00000013	00013	+	13417527	13419396	0,0,0	1	1869	0
chr1	13606723	13607611	KnowTID_00000399	00262	-	13606723	13607611	0,0,0	1	888	0
chr1	13836951	13839200	KnowTID_00000400	00263	-	13836951	13839200	0,0,0	1	2249	0
chr1	14099295	14102900	KnowTID_00000014	00014	+	14099295	14102900	0,0,0	1	3605	0
chr1	14354059	14354991	NovelTID_00000001	00001	+	14354059	14354991	0,0,0	2	702,143	0,789
chr1	14778725	14783046	KnowTID_00000015	00015	+	14778725	14783046	0,0,0	1	4321	0
chr1	15784873	15786719	KnowTID_00000016	00016	+	15784873	15786719	0,0,0	3	44,64,387	0,1171,1459
chr1	15836645	15838289	KnowTID_00000401	00264	-	15836645	15838289	0,0,0	1	1644	0
chr1	15837503	15838648	KnowTID_00000017	00017	+	15837503	15838648	0,0,0	2	651,438	0,707
chr1	16198277	16200598	KnowTID_00000402	00265	-	16198277	16200598	0,0,0	1	2321	0
chr1	16619308	16621448	KnowTID_00000403	00266	-	16619308	16621448	0,0,0	1	2140	0
chr1	16647632	16652359	KnowTID_00000018	00018	+	16647632	16652359	0,0,0	4	2227,208,95,258	0,2469,3003,4469
chr1	16676653	16677615	NovelTID_00000002	00002	+	16676653	16677615	0,0,0	2	576,160	0,802
chr1	16921050	16921877	KnowTID_00000019	00019	+	16921050	16921877	0,0,0	1	827	0
chr1	16985013	16987544	NovelTID_00000003	00003	+	16985013	16987544	0,0,0	2	1602,870	0,1661
chr1	17088719	17090873	KnowTID_00000020	00020	+	17088719	17090873	0,0,0	1	2154	0
chr1	17158485	17163184	KnowTID_00000021	00021	+	17158485	17163184	0,0,0	4	121,341,167,380	0,1407,3390,4319
chr1	17158493	17163181	KnowTID_00000022	00021	+	17158493	17163181	0,0,0	3	113,167,377	0,3382,4311
chr1	17270641	17271020	NovelTID_00000217	00143	-	17270641	17271020	0,0,0	2	52,273	0,106
chr1	18000546	18002026	KnowTID_00000404	00267	-	18000546	18002026	0,0,0	1	1480	0
chr1	19604349	19606848	KnowTID_00000023	00022	+	19604349	19606848	0,0,0	1	2499	0
chr1	19695406	19697412	NovelTID_00000004	00004	+	19695406	19697412	0,0,0	2	1599,196	0,1810
chr1	20704357	20704824	KnowTID_00000024	00023	+	20704357	20704824	0,0,0	1	467	0
chr1	20878730	20880554	KnowTID_00000405	00268	-	20878730	20880554	0,0,0	4	490,180,84,366	0,826,1196,1458
chr1	21156578	21177708	KnowTID_00000025	00024	+	21156578	21177708	0,0,0	2	54,318	0,20812
chr1	21224802	21226902	KnowTID_00000026	00025	+	21224802	21226902	0,0,0	1	2100	0
chr1	23269067	23271590	KnowTID_00000027	00026	+	23269067	23271590	0,0,0	1	2523	0
chr1	23284671	23285852	KnowTID_00000028	00027	+	23284671	23285852	0,0,0	1	1181	0
chr1	23398587	23404611	KnowTID_00000406	00269	-	23398587	23404611	0,0,0	2	1263,259	0,5765
chr1	23452038	23454011	NovelTID_00000218	00144	-	23452038	23454011	0,0,0	2	247,26	0,1947
chr1	23543100	23545569	NovelTID_00000219	00145	-	23543100	23545569	0,0,0	2	121,110	0,2359
chr1	23581051	23583614	NovelTID_00000005	00005	+	23581051	23583614	0,0,0	2	502,32	0,2531
chr1	24107463	24110263	KnowTID_00000029	00028	+	24107463	24110263	0,0,0	1	2800	0
chr1	24621717	24621931	KnowTID_00000030	00029	+	24621717	24621931	0,0,0	1	214	0
chr1	24621717	24622407	KnowTID_00000407	00270	-	24621717	24622407	0,0,0	1	690	0
chr1	24622548	24622811	KnowTID_00000031	00030	+	24622548	24622811	0,0,0	1	263	0
chr1	25020053	25021821	KnowTID_00000408	00271	-	25020053	25021821	0,0,0	2	468,173	0,1595
chr1	25020840	25022003	KnowTID_00000409	00271	-	25020840	25022003	0,0,0	2	393,355	0,808
chr1	25072148	25075540	KnowTID_00000032	00031	+	25072148	25075540	0,0,0	7	1114,435,90,201,225,1031,146	0,1120,1576,1676,1978,2208,3246
chr1	25073489	25076467	KnowTID_00000033	00031	+	25073489	25076467	0,0,0	7	62,518,889,133,334,393,122	0,342,867,1765,1905,2253,2856
chr1	26707038	26708175	KnowTID_00000410	00272	-	26707038	26708175	0,0,0	1	1137	0
chr1	27940890	27959032	KnowTID_00000034	00032	+	27940890	27959032	0,0,0	2	33,1760	0,16382
chr1	28626762	28628276	KnowTID_00000411	00273	-	28626762	28628276	0,0,0	1	1514	0
chr1	29500049	29504582	KnowTID_00000412	00274	-	29500049	29504582	0,0,0	2	3205,1313	0,3220
chr1	30177858	30179746	NovelTID_00000220	00146	-	30177858	30179746	0,0,0	2	940,208	0,1680
chr1	30235724	30237558	NovelTID_00000221	00147	-	30235724	30237558	0,0,0	2	368,31	0,1803
chr1	30510626	30511230	NovelTID_00000222	00148	-	30510626	30511230	0,0,0	2	272,36	0,568
chr1	30673688	30677228	KnowTID_00000035	00033	+	30673688	30677228	0,0,0	2	9,692	0,2848
chr1	30827134	30827640	KnowTID_00000036	00034	+	30827134	30827640	0,0,0	3	34,75,124	0,41,382
chr1	30932285	30935067	KnowTID_00000037	00035	+	30932285	30935067	0,0,0	1	2782	0
chr1	31006824	31007031	KnowTID_00000038	00036	+	31006824	31007031	0,0,0	1	207	0
chr1	31076032	31153299	KnowTID_00000413	00275	-	31076032	31153299	0,0,0	6	183,27,277,112,188,83	0,188,221,1664,28397,77184
chr1	32716426	32748804	NovelTID_00000006	00006	+	32716426	32748804	0,0,0	4	60,144,88,108	0,4664,25854,32270
chr1	32716426	32748804	NovelTID_00000007	00006	+	32716426	32748804	0,0,0	4	60,144,88,105	0,4664,25854,32273
chr1	32716426	32761271	NovelTID_00000008	00006	+	32716426	32761271	0,0,0	5	60,144,88,150,189	0,4664,25854,43672,44656
chr1	32716426	32761271	NovelTID_00000009	00006	+	32716426	32761271	0,0,0	5	60,144,88,94,189	0,4664,25854,43728,44656
chr1	32716426	32761978	NovelTID_00000010	00006	+	32716426	32761978	0,0,0	6	60,144,88,150,96,336	0,4664,25854,43672,44656,45216
chr1	32716426	32761978	NovelTID_00000011	00006	+	32716426	32761978	0,0,0	6	60,144,88,150,96,393	0,4664,25854,43672,44656,45159
chr1	32716426	32761978	NovelTID_00000012	00006	+	32716426	32761978	0,0,0	6	60,144,88,94,96,393	0,4664,25854,43728,44656,45159
chr1	32716426	32761978	NovelTID_00000013	00006	+	32716426	32761978	0,0,0	6	60,144,88,94,96,336	0,4664,25854,43728,44656,45216
chr1	32767023	32769493	KnowTID_00000039	00037	+	32767023	32769493	0,0,0	1	2470	0
chr1	33024328	33029335	KnowTID_00000414	00276	-	33024328	33029335	0,0,0	1	5007	0
chr1	33431540	33448792	NovelTID_00000223	00149	-	33431540	33448792	0,0,0	2	358,663	0,16589
chr1	33448010	33448816	NovelTID_00000224	00149	-	33448010	33448816	0,0,0	2	171,35	0,771
chr1	33728761	33731072	KnowTID_00000415	00277	-	33728761	33731072	0,0,0	1	2311	0
chr1	34395025	34397267	KnowTID_00000416	00278	-	34395025	34397267	0,0,0	1	2242	0
chr1	34472607	34474831	KnowTID_00000417	00279	-	34472607	34474831	0,0,0	1	2224	0
chr1	34534219	34542456	KnowTID_00000418	00280	-	34534219	34542456	0,0,0	5	222,101,162,126,107	0,2781,3223,7413,8130
chr1	34697250	34700134	KnowTID_00000419	00281	-	34697250	34700134	0,0,0	3	164,129,262	0,1966,2622
chr1	35203242	35204413	NovelTID_00000225	00150	-	35203242	35204413	0,0,0	2	32,295	0,876
chr1	35635626	35637392	NovelTID_00000226	00151	-	35635626	35637392	0,0,0	2	26,219	0,1547
chr1	35681169	35687349	NovelTID_00000227	00152	-	35681169	35687349	0,0,0	2	65,3853	0,2327
chr1	35682605	35684287	NovelTID_00000228	00152	-	35682605	35684287	0,0,0	2	590,791	0,891
chr1	35688971	35690707	NovelTID_00000229	00153	-	35688971	35690707	0,0,0	2	29,1173	0,563
chr1	35689417	35693120	NovelTID_00000230	00153	-	35689417	35693120	0,0,0	2	362,1725	0,1978
chr1	35936689	35937964	KnowTID_00000040	00038	+	35936689	35937964	0,0,0	2	128,438	0,837
chr1	35938182	35940310	NovelTID_00000231	00154	-	35938182	35940310	0,0,0	2	323,815	0,1313
chr1	36059863	36060666	KnowTID_00000420	00282	-	36059863	36060666	0,0,0	2	388,8	0,795
chr1	36067916	36068739	KnowTID_00000041	00039	+	36067916	36068739	0,0,0	2	124,301	0,522
chr1	36086491	36087863	KnowTID_00000421	00283	-	36086491	36087863	0,0,0	1	1372	0
chr1	36111030	36117110	NovelTID_00000232	00155	-	36111030	36117110	0,0,0	2	273,441	0,5639
chr1	36181101	36182031	NovelTID_00000014	00007	+	36181101	36182031	0,0,0	2	95,695	0,235
chr1	36188886	36195591	KnowTID_00000042	00040	+	36188886	36195591	0,0,0	4	280,527,198,3335	0,845,2624,3370
chr1	36389552	36390266	KnowTID_00000043	00041	+	36389552	36390266	0,0,0	1	714	0
chr1	36426112	36448379	NovelTID_00000233	00156	-	36426112	36448379	0,0,0	4	67,143,229,8931	0,9028,11356,13336
chr1	36518814	36528290	NovelTID_00000015	00008	+	36518814	36528290	0,0,0	5	161,61,130,122,194	0,352,677,3602,9282
chr1	36518814	36528290	NovelTID_00000016	00008	+	36518814	36528290	0,0,0	5	161,65,130,122,194	0,352,677,3602,9282
chr1	36522416	36526463	NovelTID_00000234	00157	-	36522416	36526463	0,0,0	2	37,1260	0,2787
chr1	36522416	36528342	NovelTID_00000235	00157	-	36522416	36528342	0,0,0	3	37,176,36	0,2787,5890
chr1	36523486	36528342	NovelTID_00000236	00157	-	36523486	36528342	0,0,0	2	1893,36	0,4820
chr1	36771390	36771783	KnowTID_00000044	00042	+	36771390	36771783	0,0,0	1	393	0
chr1	36772438	36782529	NovelTID_00000237	00158	-	36772438	36782529	0,0,0	2	194,377	0,9714
chr1	36795892	36801637	KnowTID_00000422	00284	-	36795892	36801637	0,0,0	2	1294,339	0,5406
chr1	36997313	36999413	NovelTID_00000238	00159	-	36997313	36999413	0,0,0	2	252,145	0,1955
chr1	37189117	37190109	KnowTID_00000423	00285	-	37189117	37190109	0,0,0	1	992	0
chr1	37356196	37356542	KnowTID_00000424	00286	-	37356196	37356542	0,0,0	1	346	0
chr1	37799051	37801607	NovelTID_00000017	00009	+	37799051	37801607	0,0,0	2	39,368	0,2188
chr1	37922143	37928233	KnowTID_00000045	00043	+	37922143	37928233	0,0,0	2	208,2881	0,3209
chr1	38188927	38216737	KnowTID_00000046	00044	+	38188927	38216737	0,0,0	6	88,172,138,1262,47,141	0,11940,13116,25373,27132,27669
chr1	38824028	38824531	KnowTID_00000047	00045	+	38824028	38824531	0,0,0	1	503	0
chr1	39042434	39044532	KnowTID_00000425	00287	-	39042434	39044532	0,0,0	1	2098	0
chr1	39105492	39114482	KnowTID_00000426	00288	-	39105492	39114482	0,0,0	2	448,1395	0,7595
chr1	39638654	39648621	NovelTID_00000239	00160	-	39638654	39648621	0,0,0	2	2768,384	0,9583
chr1	39899272	39904175	KnowTID_00000427	00289	-	39899272	39904175	0,0,0	5	129,86,112,182,22	0,1590,2800,3237,4881
chr1	39899272	39904175	KnowTID_00000428	00289	-	39899272	39904175	0,0,0	3	129,112,22	0,2800,4881
chr1	39920473	39921447	NovelTID_00000018	00010	+	39920473	39921447	0,0,0	2	321,27	0,947
chr1	40105883	40107213	KnowTID_00000429	00290	-	40105883	40107213	0,0,0	1	1330	0
chr1	40224308	40224953	NovelTID_00000019	00011	+	40224308	40224953	0,0,0	2	36,252	0,393
chr1	40737425	40738304	KnowTID_00000430	00291	-	40737425	40738304	0,0,0	1	879	0
chr1	41224404	41238097	KnowTID_00000431	00292	-	41224404	41238097	0,0,0	3	279,40,254	0,8816,13439
chr1	41583775	41586388	KnowTID_00000432	00293	-	41583775	41586388	0,0,0	1	2613	0
chr1	42318411	42342479	NovelTID_00000020	00012	+	42318411	42342479	0,0,0	2	432,5004	0,19064
chr1	42318626	42342694	NovelTID_00000021	00012	+	42318626	42342694	0,0,0	3	217,143,5219	0,10987,18849
chr1	42318626	42360695	NovelTID_00000022	00012	+	42318626	42360695	0,0,0	4	217,143,434,1996	0,10987,33966,40073
chr1	42318626	42363517	NovelTID_00000023	00012	+	42318626	42363517	0,0,0	5	217,143,434,98,2822	0,10987,33966,40073,42069
chr1	42318626	42363517	NovelTID_00000024	00012	+	42318626	42363517	0,0,0	4	217,143,434,2822	0,10987,33966,42069
chr1	42357664	42363517	NovelTID_00000025	00012	+	42357664	42363517	0,0,0	2	1133,2822	0,3031
chr1	42591100	42593220	KnowTID_00000048	00046	+	42591100	42593220	0,0,0	1	2120	0
chr1	42749876	42751670	KnowTID_00000433	00294	-	42749876	42751670	0,0,0	2	1459,79	0,1715
chr1	42763916	42764897	KnowTID_00000434	00295	-	42763916	42764897	0,0,0	1	981	0
chr1	42763988	42769506	KnowTID_00000435	00295	-	42763988	42769506	0,0,0	3	115,62,459	0,1213,5059
chr1	42763988	42770553	KnowTID_00000436	00295	-	42763988	42770553	0,0,0	4	115,62,103,354	0,1213,5059,6211
chr1	42807556	42809726	KnowTID_00000049	00047	+	42807556	42809726	0,0,0	1	2170	0
chr1	43253826	43273438	KnowTID_00000050	00048	+	43253826	43273438	0,0,0	3	228,209,3182	0,11941,16430
chr1	43307000	43359772	KnowTID_00000437	00296	-	43307000	43359772	0,0,0	6	388,111,132,113,199,247	0,8172,10403,12078,51258,52525
chr1	43715530	43724582	NovelTID_00000240	00161	-	43715530	43724582	0,0,0	4	2012,102,169,38	0,4553,7310,9014
chr1	43938190	43944889	NovelTID_00000241	00162	-	43938190	43944889	0,0,0	2	356,76	0,6623
chr1	44449653	44451292	KnowTID_00000051	00049	+	44449653	44451292	0,0,0	3	89,139,880	0,361,759
chr1	44523456	44525570	KnowTID_00000438	00297	-	44523456	44525570	0,0,0	1	2114	0
chr1	44594194	44596739	KnowTID_00000439	00298	-	44594194	44596739	0,0,0	1	2545	0
chr1	45824584	45827047	KnowTID_00000052	00050	+	45824584	45827047	0,0,0	2	166,2053	0,410
chr1	46934047	46937917	KnowTID_00000440	00299	-	46934047	46937917	0,0,0	1	3870	0
chr1	47490667	47492609	KnowTID_00000441	00300	-	47490667	47492609	0,0,0	1	1942	0
chr1	48273423	48274947	NovelTID_00000242	00163	-	48273423	48274947	0,0,0	2	214,103	0,1421
chr1	49022811	49024216	KnowTID_00000442	00301	-	49022811	49024216	0,0,0	2	808,577	0,828
chr1	50164315	50165804	KnowTID_00000053	00051	+	50164315	50165804	0,0,0	1	1489	0
chr1	50800230	50800839	NovelTID_00000243	00164	-	50800230	50800839	0,0,0	2	363,114	0,495
chr1	50869288	50874539	KnowTID_00000054	00052	+	50869288	50874539	0,0,0	2	186,2449	0,2802
chr1	50869318	50874545	KnowTID_00000055	00052	+	50869318	50874545	0,0,0	2	156,2302	0,2925
chr1	51252064	51254590	KnowTID_00000056	00053	+	51252064	51254590	0,0,0	1	2526	0
chr1	51390214	51400123	NovelTID_00000026	00013	+	51390214	51400123	0,0,0	2	54,294	0,9615
chr1	51514777	51515775	KnowTID_00000443	00302	-	51514777	51515775	0,0,0	2	391,155	0,843
chr1	51563929	51569173	KnowTID_00000444	00303	-	51563929	51569173	0,0,0	2	2959,90	0,5154
chr1	51563929	51653562	KnowTID_00000445	00303	-	51563929	51653562	0,0,0	4	2959,419,93,418	0,75274,83298,89215
chr1	51583848	51586213	KnowTID_00000446	00304	-	51583848	51586213	0,0,0	1	2365	0
chr1	52388667	52395009	KnowTID_00000057	00054	+	52388667	52395009	0,0,0	2	62,3484	0,2858
chr1	52567563	52569716	KnowTID_00000058	00055	+	52567563	52569716	0,0,0	1	2153	0
chr1	52570224	52572152	NovelTID_00000027	00014	+	52570224	52572152	0,0,0	2	779,1056	0,872
chr1	52570224	52577372	NovelTID_00000028	00014	+	52570224	52577372	0,0,0	2	779,321	0,6827
chr1	52570224	52577372	NovelTID_00000029	00014	+	52570224	52577372	0,0,0	3	779,889,321	0,872,6827
chr1	52579742	52639517	KnowTID_00000059	00056	+	52579742	52639517	0,0,0	5	253,79,61,72,233	0,14229,29642,47148,59542
chr1	52626857	52637136	KnowTID_00000447	00305	-	52626857	52637136	0,0,0	6	2475,128,93,91,126,31	0,5121,6360,6560,8764,10248
chr1	53754873	53763628	KnowTID_00000448	00306	-	53754873	53763628	0,0,0	4	499,63,63,107	0,602,3988,8648
chr1	53848044	53849499	KnowTID_00000060	00057	+	53848044	53849499	0,0,0	1	1455	0
chr1	54257770	54259124	NovelTID_00000244	00165	-	54257770	54259124	0,0,0	2	27,1269	0,85
chr1	55299045	55300659	KnowTID_00000061	00058	+	55299045	55300659	0,0,0	1	1614	0
chr1	55301192	55302698	KnowTID_00000062	00059	+	55301192	55302698	0,0,0	1	1506	0
chr1	55931358	55933994	NovelTID_00000245	00166	-	55931358	55933994	0,0,0	2	417,23	0,2613
chr1	55948920	55972689	KnowTID_00000063	00060	+	55948920	55972689	0,0,0	3	315,420,886	0,9264,22883
chr1	55988084	56029172	KnowTID_00000064	00061	+	55988084	56029172	0,0,0	6	102,135,110,362,178,1249	0,3045,25594,26404,29744,39839
chr1	56017757	56029172	KnowTID_00000065	00061	+	56017757	56029172	0,0,0	3	249,138,1249	0,9601,10166
chr1	56075821	56077047	KnowTID_00000066	00062	+	56075821	56077047	0,0,0	2	76,348	0,878
chr1	56322437	56323385	NovelTID_00000246	00167	-	56322437	56323385	0,0,0	2	31,847	0,101
chr1	56588667	56590720	KnowTID_00000067	00063	+	56588667	56590720	0,0,0	1	2053	0
chr1	57184183	57186245	KnowTID_00000068	00064	+	57184183	57186245	0,0,0	1	2062	0
chr1	57257488	57271840	KnowTID_00000449	00307	-	57257488	57271840	0,0,0	7	2203,80,186,240,234,184,177	0,3884,6069,8155,11761,13068,14175
chr1	57383621	57384640	NovelTID_00000247	00168	-	57383621	57384640	0,0,0	2	300,27	0,992
chr1	57416065	57434388	KnowTID_00000450	00308	-	57416065	57434388	0,0,0	4	1442,198,272,140	0,3344,16026,18183
chr1	57416115	57433724	KnowTID_00000451	00308	-	57416115	57433724	0,0,0	4	1392,198,272,39	0,3294,15976,17570
chr1	57416115	57434365	KnowTID_00000452	00308	-	57416115	57434365	0,0,0	4	1392,198,272,82	0,3294,15976,18168
chr1	57577674	57580486	KnowTID_00000453	00309	-	57577674	57580486	0,0,0	1	2812	0
chr1	57746621	57815559	NovelTID_00000248	00169	-	57746621	57815559	0,0,0	2	303,27	0,68911
chr1	58440355	58442978	KnowTID_00000454	00310	-	58440355	58442978	0,0,0	1	2623	0
chr1	58709484	58712675	KnowTID_00000069	00065	+	58709484	58712675	0,0,0	2	49,887	0,2304
chr1	58816139	58820217	KnowTID_00000455	00311	-	58816139	58820217	0,0,0	2	729,1512	0,2566
chr1	58820592	58823998	KnowTID_00000456	00312	-	58820592	58823998	0,0,0	1	3406	0
chr1	59294144	59294597	NovelTID_00000249	00170	-	59294144	59294597	0,0,0	2	68,191	0,262
chr1	59294213	59295863	NovelTID_00000030	00015	+	59294213	59295863	0,0,0	2	384,335	0,1315
chr1	59443548	59448438	NovelTID_00000031	00016	+	59443548	59448438	0,0,0	2	163,39	0,4851
chr1	59448535	59449884	NovelTID_00000032	00017	+	59448535	59449884	0,0,0	2	32,266	0,1083
chr1	59465447	59474562	NovelTID_00000250	00171	-	59465447	59474562	0,0,0	2	565,133	0,8982
chr1	59469292	59475750	NovelTID_00000251	00171	-	59469292	59475750	0,0,0	3	2818,159,115	0,5137,6343
chr1	59504708	59506346	KnowTID_00000457	00313	-	59504708	59506346	0,0,0	1	1638	0
chr1	59545323	59549449	KnowTID_00000458	00314	-	59545323	59549449	0,0,0	2	3227,360	0,3766
chr1	59560708	59564063	NovelTID_00000033	00018	+	59560708	59564063	0,0,0	3	27,222,864	0,1480,2491
chr1	59562534	59564063	NovelTID_00000034	00018	+	59562534	59564063	0,0,0	2	46,1339	0,190
chr1	59773381	59775888	KnowTID_00000070	00066	+	59773381	59775888	0,0,0	1	2507	0
chr1	59819875	59821115	KnowTID_00000459	00315	-	59819875	59821115	0,0,0	2	121,225	0,1015
chr1	59930312	59932700	KnowTID_00000071	00067	+	59930312	59932700	0,0,0	1	2388	0
chr1	59933714	59935858	KnowTID_00000072	00068	+	59933714	59935858	0,0,0	1	2144	0
chr1	60126628	60129954	KnowTID_00000460	00316	-	60126628	60129954	0,0,0	1	3326	0
chr1	60127558	60127850	KnowTID_00000461	00316	-	60127558	60127850	0,0,0	2	227,17	0,275
chr1	60651650	60653080	KnowTID_00000462	00317	-	60651650	60653080	0,0,0	1	1430	0
chr1	60655028	60656297	NovelTID_00000252	00172	-	60655028	60656297	0,0,0	2	591,96	0,1173
chr1	60867935	60872311	NovelTID_00000035	00019	+	60867935	60872311	0,0,0	2	763,1885	0,2491
chr1	60867935	60913800	NovelTID_00000036	00019	+	60867935	60913800	0,0,0	2	763,1134	0,44731
chr1	60867935	60937148	NovelTID_00000037	00019	+	60867935	60937148	0,0,0	3	763,116,143	0,57415,69070
chr1	60882685	60903515	NovelTID_00000253	00173	-	60882685	60903515	0,0,0	2	342,35	0,20795
chr1	60937181	60938582	KnowTID_00000073	00069	+	60937181	60938582	0,0,0	1	1401	0
chr1	61007546	61008274	NovelTID_00000254	00174	-	61007546	61008274	0,0,0	2	252,35	0,693
chr1	61030612	61034718	NovelTID_00000038	00020	+	61030612	61034718	0,0,0	3	154,137,80	0,1158,4026
chr1	61030710	61032308	NovelTID_00000039	00020	+	61030710	61032308	0,0,0	2	56,538	0,1060
chr1	61587738	61593699	NovelTID_00000040	00021	+	61587738	61593699	0,0,0	2	40,299	0,5662
chr1	62696069	62697267	NovelTID_00000255	00175	-	62696069	62697267	0,0,0	2	43,284	0,914
chr1	62745446	62747073	NovelTID_00000256	00176	-	62745446	62747073	0,0,0	2	392,256	0,1371
chr1	62867928	62878944	KnowTID_00000463	00318	-	62867928	62878944	0,0,0	2	598,273	0,10743
chr1	62889232	62906011	NovelTID_00000257	00177	-	62889232	62906011	0,0,0	2	293,49	0,16730
chr1	62930837	62931880	NovelTID_00000041	00022	+	62930837	62931880	0,0,0	2	169,422	0,621
chr1	62953853	62983445	NovelTID_00000258	00178	-	62953853	62983445	0,0,0	3	27,79,98	0,26367,29494
chr1	63294594	63295073	KnowTID_00000464	00319	-	63294594	63295073	0,0,0	1	479	0
chr1	63304006	63305837	KnowTID_00000074	00070	+	63304006	63305837	0,0,0	3	297,116,394	0,1084,1437
chr1	63304006	63312979	KnowTID_00000075	00070	+	63304006	63312979	0,0,0	4	297,116,57,35	0,1084,6066,8938
chr1	64232564	64349617	KnowTID_00000465	00320	-	64232564	64349617	0,0,0	2	1251,37	0,117016
chr1	64527481	64528808	KnowTID_00000466	00321	-	64527481	64528808	0,0,0	1	1327	0
chr1	64563427	64565191	NovelTID_00000042	00023	+	64563427	64565191	0,0,0	4	24,94,123,488	0,375,898,1276
chr1	64563631	64564415	NovelTID_00000043	00023	+	64563631	64564415	0,0,0	2	265,90	0,694
chr1	64667098	64669330	KnowTID_00000076	00071	+	64667098	64669330	0,0,0	1	2232	0
chr1	64785084	64787181	KnowTID_00000077	00072	+	64785084	64787181	0,0,0	1	2097	0
chr1	65483474	65486193	KnowTID_00000467	00322	-	65483474	65486193	0,0,0	2	2394,112	0,2607
chr1	66867799	66872488	KnowTID_00000468	00323	-	66867799	66872488	0,0,0	1	4689	0
chr1	67142863	67150887	NovelTID_00000259	00179	-	67142863	67150887	0,0,0	2	392,1064	0,6960
chr1	67142863	67163083	NovelTID_00000260	00179	-	67142863	67163083	0,0,0	4	392,978,196,166	0,6960,18040,20054
chr1	67142863	67163083	NovelTID_00000261	00179	-	67142863	67163083	0,0,0	4	392,978,196,143	0,6960,18040,20077
chr1	67147274	67163083	NovelTID_00000262	00179	-	67147274	67163083	0,0,0	3	3527,196,166	0,13629,15643
chr1	67147274	67163083	NovelTID_00000263	00179	-	67147274	67163083	0,0,0	3	3527,196,143	0,13629,15666
chr1	67155128	67163083	NovelTID_00000264	00179	-	67155128	67163083	0,0,0	3	512,5408,166	0,563,7789
chr1	67155128	67163083	NovelTID_00000265	00179	-	67155128	67163083	0,0,0	3	512,5408,143	0,563,7812
chr1	67949806	67952106	KnowTID_00000078	00073	+	67949806	67952106	0,0,0	2	229,2063	0,237
chr1	69476213	69478849	NovelTID_00000266	00180	-	69476213	69478849	0,0,0	2	316,905	0,1731
chr1	69487629	69490658	KnowTID_00000079	00074	+	69487629	69490658	0,0,0	1	3029	0
chr1	69536930	69540362	KnowTID_00000469	00324	-	69536930	69540362	0,0,0	1	3432	0
chr1	69815532	69835841	NovelTID_00000044	00024	+	69815532	69835841	0,0,0	2	98,1843	0,18466
chr1	69817441	69819327	KnowTID_00000470	00325	-	69817441	69819327	0,0,0	1	1886	0
chr1	71731244	71739412	NovelTID_00000045	00025	+	71731244	71739412	0,0,0	2	84,127	0,8041
chr1	71889663	71893184	KnowTID_00000471	00326	-	71889663	71893184	0,0,0	1	3521	0
chr1	71934685	71937778	KnowTID_00000080	00075	+	71934685	71937778	0,0,0	3	410,96,513	0,507,2580
chr1	71934685	71937778	KnowTID_00000081	00075	+	71934685	71937778	0,0,0	3	90,96,513	0,507,2580
chr1	71940641	71963699	KnowTID_00000472	00327	-	71940641	71963699	0,0,0	2	2833,156	0,22902
chr1	71981293	71985197	NovelTID_00000267	00181	-	71981293	71985197	0,0,0	2	2061,823	0,3081
chr1	72153728	72168575	KnowTID_00000473	00328	-	72153728	72168575	0,0,0	4	1863,89,39,57	0,7341,14082,14790
chr1	72603122	72604765	KnowTID_00000082	00076	+	72603122	72604765	0,0,0	1	1643	0
chr1	72617085	72623084	NovelTID_00000268	00182	-	72617085	72623084	0,0,0	2	2788,170	0,5829
chr1	72776761	72781862	NovelTID_00000269	00183	-	72776761	72781862	0,0,0	2	92,468	0,4633
chr1	72791732	72802500	NovelTID_00000270	00184	-	72791732	72802500	0,0,0	4	367,56,1359,130	0,5686,7127,10638
chr1	72791732	72802500	NovelTID_00000271	00184	-	72791732	72802500	0,0,0	4	367,56,371,130	0,5686,8115,10638
chr1	72796739	72802500	NovelTID_00000272	00184	-	72796739	72802500	0,0,0	4	43,56,371,130	0,679,3108,5631
chr1	72797019	72802500	NovelTID_00000273	00184	-	72797019	72802500	0,0,0	4	189,56,1359,130	0,399,1840,5351
chr1	72809575	72816305	NovelTID_00000274	00185	-	72809575	72816305	0,0,0	2	35,197	0,6533
chr1	72809575	72819382	NovelTID_00000275	00185	-	72809575	72819382	0,0,0	2	35,302	0,9505
chr1	72809744	72819418	NovelTID_00000276	00185	-	72809744	72819418	0,0,0	2	37,338	0,9336
chr1	72814700	72816305	NovelTID_00000277	00185	-	72814700	72816305	0,0,0	2	192,197	0,1408
chr1	72983409	72985550	NovelTID_00000046	00026	+	72983409	72985550	0,0,0	4	147,101,138,419	0,241,520,1722
chr1	72983472	72984318	NovelTID_00000047	00026	+	72983472	72984318	0,0,0	2	84,668	0,178
chr1	72983566	72984163	NovelTID_00000048	00026	+	72983566	72984163	0,0,0	2	185,234	0,363
chr1	72998105	73007478	KnowTID_00000083	00077	+	72998105	73007478	0,0,0	3	72,1430,434	0,4867,8939
chr1	73010359	73019747	KnowTID_00000084	00078	+	73010359	73019747	0,0,0	2	40,2453	0,6935
chr1	73064718	73065452	KnowTID_00000474	00329	-	73064718	73065452	0,0,0	1	734	0
chr1	73069058	73069453	KnowTID_00000475	00330	-	73069058	73069453	0,0,0	1	395	0
chr1	73092431	73093921	NovelTID_00000278	00186	-	73092431	73093921	0,0,0	2	841,132	0,1358
chr1	73253463	73255997	KnowTID_00000476	00331	-	73253463	73255997	0,0,0	1	2534	0
chr1	73437958	73454143	KnowTID_00000477	00332	-	73437958	73454143	0,0,0	5	1016,184,73,58,229	0,5646,8819,13611,15956
chr1	73441907	73454143	KnowTID_00000478	00332	-	73441907	73454143	0,0,0	6	229,208,73,164,58,229	0,1673,4870,5501,9662,12007
chr1	73445541	73477353	KnowTID_00000085	00079	+	73445541	73477353	0,0,0	3	134,129,288	0,3619,31524
chr1	73568670	73572034	KnowTID_00000479	00333	-	73568670	73572034	0,0,0	1	3364	0
chr1	73572408	73575549	NovelTID_00000279	00187	-	73572408	73575549	0,0,0	2	114,251	0,2890
chr1	73664661	73790523	KnowTID_00000480	00334	-	73664661	73790523	0,0,0	4	579,229,71,350	0,2108,54908,125512
chr1	74863594	74872492	NovelTID_00000049	00027	+	74863594	74872492	0,0,0	3	187,86,254	0,7766,8644
chr1	74863665	74874592	NovelTID_00000050	00027	+	74863665	74874592	0,0,0	2	116,2354	0,8573
chr1	75000825	75002415	KnowTID_00000086	00080	+	75000825	75002415	0,0,0	1	1590	0
chr1	75683710	75684798	KnowTID_00000087	00081	+	75683710	75684798	0,0,0	1	1088	0
chr1	75933257	75952418	NovelTID_00000051	00028	+	75933257	75952418	0,0,0	3	225,143,129	0,2793,19032
chr1	76481085	76506589	NovelTID_00000280	00188	-	76481085	76506589	0,0,0	2	430,83	0,25421
chr1	76485707	76498603	KnowTID_00000088	00082	+	76485707	76498603	0,0,0	5	82,99,60,250,1697	0,5293,6297,8401,11199
chr1	76485707	76498603	KnowTID_00000089	00082	+	76485707	76498603	0,0,0	5	82,99,60,66,1697	0,5293,6297,8401,11199
chr1	76510210	76526519	NovelTID_00000052	00029	+	76510210	76526519	0,0,0	3	439,215,2129	0,10957,14180
chr1	76887046	77024367	KnowTID_00000481	00335	-	76887046	77024367	0,0,0	2	2206,250	0,137071
chr1	77543651	77553490	NovelTID_00000053	00030	+	77543651	77553490	0,0,0	3	407,144,967	0,8108,8872
chr1	77601295	77618682	NovelTID_00000054	00031	+	77601295	77618682	0,0,0	2	458,74	0,17313
chr1	77642555	77659678	NovelTID_00000281	00189	-	77642555	77659678	0,0,0	2	299,37	0,17086
chr1	77768397	77803618	NovelTID_00000282	00190	-	77768397	77803618	0,0,0	2	93,113	0,35108
chr1	77856429	77892874	NovelTID_00000283	00191	-	77856429	77892874	0,0,0	2	83,194	0,36251
chr1	80143547	80145376	KnowTID_00000482	00336	-	80143547	80145376	0,0,0	1	1829	0
chr1	80183524	80188603	KnowTID_00000090	00083	+	80183524	80188603	0,0,0	3	132,212,343	0,3057,4736
chr1	80221618	80225367	KnowTID_00000091	00084	+	80221618	80225367	0,0,0	2	128,1333	0,2416
chr1	80232979	80244015	KnowTID_00000092	00085	+	80232979	80244015	0,0,0	2	156,55	0,10981
chr1	80251605	80252772	KnowTID_00000483	00337	-	80251605	80252772	0,0,0	1	1167	0
chr1	80442506	80472235	KnowTID_00000093	00086	+	80442506	80472235	0,0,0	3	63,60,271	0,4145,29458
chr1	81516912	81519545	KnowTID_00000484	00338	-	81516912	81519545	0,0,0	1	2633	0
chr1	82101754	82103558	KnowTID_00000094	00087	+	82101754	82103558	0,0,0	1	1804	0
chr1	82802997	82804043	KnowTID_00000485	00339	-	82802997	82804043	0,0,0	1	1046	0
chr1	82903478	82907429	KnowTID_00000095	00088	+	82903478	82907429	0,0,0	1	3951	0
chr1	82909899	82910705	KnowTID_00000096	00089	+	82909899	82910705	0,0,0	1	806	0
chr1	82921491	82922287	KnowTID_00000097	00090	+	82921491	82922287	0,0,0	1	796	0
chr1	82939133	82939963	KnowTID_00000486	00340	-	82939133	82939963	0,0,0	1	830	0
chr1	82951760	82952588	KnowTID_00000487	00341	-	82951760	82952588	0,0,0	1	828	0
chr1	82956797	82957706	KnowTID_00000098	00091	+	82956797	82957706	0,0,0	1	909	0
chr1	83038099	83039055	KnowTID_00000488	00342	-	83038099	83039055	0,0,0	1	956	0
chr1	83054860	83055950	KnowTID_00000489	00343	-	83054860	83055950	0,0,0	1	1090	0
chr1	83054860	83055950	KnowTID_00000490	00343	-	83054860	83055950	0,0,0	2	534,548	0,542
chr1	83057504	83058496	KnowTID_00000099	00092	+	83057504	83058496	0,0,0	1	992	0
chr1	83423170	83423973	KnowTID_00000491	00344	-	83423170	83423973	0,0,0	1	803	0
chr1	83840176	83908146	KnowTID_00000492	00345	-	83840176	83908146	0,0,0	7	173,290,46,64,138,66,857	0,6952,10813,37191,37779,38557,67113
chr1	83840176	83908219	KnowTID_00000493	00345	-	83840176	83908219	0,0,0	8	173,290,46,64,138,66,44,687	0,6952,10813,37191,37779,38557,67113,67356
chr1	84954756	84956626	NovelTID_00000284	00192	-	84954756	84956626	0,0,0	2	193,388	0,1482
chr1	84987104	84989255	KnowTID_00000494	00346	-	84987104	84989255	0,0,0	2	162,291	0,1860
chr1	87386900	87387288	NovelTID_00000285	00193	-	87386900	87387288	0,0,0	2	129,116	0,272
chr1	87467464	87471479	NovelTID_00000286	00194	-	87467464	87471479	0,0,0	2	445,197	0,3818
chr1	87783400	87789319	NovelTID_00000287	00195	-	87783400	87789319	0,0,0	2	227,2293	0,3626
chr1	87868939	87883492	KnowTID_00000495	00347	-	87868939	87883492	0,0,0	4	192,116,159,115	0,435,2892,14438
chr1	88206167	88206714	NovelTID_00000055	00032	+	88206167	88206714	0,0,0	2	48,339	0,208
chr1	88387060	88389842	NovelTID_00000056	00033	+	88387060	88389842	0,0,0	2	1571,1075	0,1707
chr1	88417734	88418940	KnowTID_00000496	00348	-	88417734	88418940	0,0,0	1	1206	0
chr1	88429179	88432516	NovelTID_00000288	00196	-	88429179	88432516	0,0,0	2	1149,44	0,3293
chr1	88534775	88537029	KnowTID_00000100	00093	+	88534775	88537029	0,0,0	1	2254	0
chr1	89350281	89352509	KnowTID_00000101	00094	+	89350281	89352509	0,0,0	1	2228	0
chr1	89503379	89507545	NovelTID_00000057	00034	+	89503379	89507545	0,0,0	2	1240,2538	0,1628
chr1	90325447	90359201	NovelTID_00000289	00197	-	90325447	90359201	0,0,0	3	358,93,109	0,17401,33645
chr1	90325447	90359201	NovelTID_00000290	00197	-	90325447	90359201	0,0,0	3	358,112,109	0,17401,33645
chr1	90325447	90359667	NovelTID_00000291	00197	-	90325447	90359667	0,0,0	3	358,112,125	0,17401,34095
chr1	90340553	90359201	NovelTID_00000292	00197	-	90340553	90359201	0,0,0	3	255,112,109	0,2295,18539
chr1	90340553	90359201	NovelTID_00000293	00197	-	90340553	90359201	0,0,0	3	258,112,109	0,2295,18539
chr1	90340553	90359201	NovelTID_00000294	00197	-	90340553	90359201	0,0,0	3	258,93,109	0,2295,18539
chr1	90340553	90359201	NovelTID_00000295	00197	-	90340553	90359201	0,0,0	3	255,93,109	0,2295,18539
chr1	90340553	90359667	NovelTID_00000296	00197	-	90340553	90359667	0,0,0	3	255,112,125	0,2295,18989
chr1	90340553	90359667	NovelTID_00000297	00197	-	90340553	90359667	0,0,0	3	258,112,125	0,2295,18989
chr1	90448091	90458742	KnowTID_00000102	00095	+	90448091	90458742	0,0,0	6	251,96,451,110,123,1592	0,3640,4808,5692,8351,9059
chr1	90456441	90458742	KnowTID_00000103	00095	+	90456441	90458742	0,0,0	2	124,1592	0,709
chr1	90549659	90551420	KnowTID_00000104	00096	+	90549659	90551420	0,0,0	1	1761	0
chr1	90551823	90555036	NovelTID_00000058	00035	+	90551823	90555036	0,0,0	2	140,794	0,2419
chr1	90651464	90652308	KnowTID_00000105	00097	+	90651464	90652308	0,0,0	3	69,207,200	0,194,644
chr1	90899027	90912594	NovelTID_00000298	00198	-	90899027	90912594	0,0,0	2	691,47	0,13520
chr1	90912687	90918785	KnowTID_00000106	00098	+	90912687	90918785	0,0,0	3	260,104,239	0,433,5859
chr1	91154082	91154703	NovelTID_00000059	00036	+	91154082	91154703	0,0,0	2	119,382	0,239
chr1	91256921	91302708	KnowTID_00000497	00349	-	91256921	91302708	0,0,0	3	370,116,100	0,1527,45687
chr1	92050202	92056037	KnowTID_00000107	00099	+	92050202	92056037	0,0,0	3	465,155,390	0,475,5445
chr1	92123734	92125101	KnowTID_00000498	00350	-	92123734	92125101	0,0,0	2	1023,332	0,1035
chr1	92152597	92156798	NovelTID_00000299	00199	-	92152597	92156798	0,0,0	2	45,229	0,3972
chr1	92171493	92172103	KnowTID_00000108	00100	+	92171493	92172103	0,0,0	1	610	0
chr1	92177032	92180487	KnowTID_00000109	00101	+	92177032	92180487	0,0,0	2	149,852	0,2603
chr1	92234537	92270632	NovelTID_00000060	00037	+	92234537	92270632	0,0,0	2	570,32	0,36063
chr1	92234537	92334417	NovelTID_00000061	00037	+	92234537	92334417	0,0,0	4	570,84,227,52	0,44644,58309,99828
chr1	92349968	92351076	KnowTID_00000499	00351	-	92349968	92351076	0,0,0	2	871,165	0,943
chr1	92417070	92419872	KnowTID_00000110	00102	+	92417070	92419872	0,0,0	1	2802	0
chr1	92655213	92657064	KnowTID_00000111	00103	+	92655213	92657064	0,0,0	1	1851	0
chr1	92753852	92754393	NovelTID_00000300	00200	-	92753852	92754393	0,0,0	2	39,408	0,133
chr1	92754536	92758317	KnowTID_00000112	00104	+	92754536	92758317	0,0,0	2	145,127	0,3654
chr1	92767159	92767996	KnowTID_00000500	00352	-	92767159	92767996	0,0,0	1	837	0
chr1	93134760	93137931	KnowTID_00000501	00353	-	93134760	93137931	0,0,0	2	225,106	0,3065
chr1	93301455	93302606	KnowTID_00000502	00354	-	93301455	93302606	0,0,0	3	304,119,124	0,617,1027
chr1	93379600	93381351	KnowTID_00000113	00105	+	93379600	93381351	0,0,0	2	298,1371	0,380
chr1	93507981	93510107	NovelTID_00000301	00201	-	93507981	93510107	0,0,0	2	1587,436	0,1690
chr1	93812836	93816128	KnowTID_00000114	00106	+	93812836	93816128	0,0,0	1	3292	0
chr1	94084741	94086365	NovelTID_00000062	00038	+	94084741	94086365	0,0,0	2	223,19	0,1605
chr1	94144259	94146441	NovelTID_00000302	00202	-	94144259	94146441	0,0,0	2	653,31	0,2151
chr1	94233889	94238757	NovelTID_00000303	00203	-	94233889	94238757	0,0,0	2	520,158	0,4710
chr1	94240128	94244092	NovelTID_00000063	00039	+	94240128	94244092	0,0,0	2	128,1153	0,2811
chr1	94246473	94248471	NovelTID_00000064	00040	+	94246473	94248471	0,0,0	2	585,880	0,1118
chr1	94276237	94290201	NovelTID_00000065	00041	+	94276237	94290201	0,0,0	3	162,172,410	0,950,13554
chr1	94284536	94290201	NovelTID_00000066	00041	+	94284536	94290201	0,0,0	2	4067,410	0,5255
chr1	94468950	94469326	KnowTID_00000503	00355	-	94468950	94469326	0,0,0	1	376	0
chr1	94586642	94627327	NovelTID_00000304	00204	-	94586642	94627327	0,0,0	4	25,145,194,124	0,30020,35799,40561
chr1	94586642	94627327	NovelTID_00000305	00204	-	94586642	94627327	0,0,0	4	25,145,214,124	0,30020,35799,40561
chr1	94607328	94614055	NovelTID_00000067	00042	+	94607328	94614055	0,0,0	3	190,98,96	0,3850,6631
chr1	94609733	94613774	NovelTID_00000306	00204	-	94609733	94613774	0,0,0	2	1916,141	0,3900
chr1	94610614	94627327	NovelTID_00000307	00204	-	94610614	94627327	0,0,0	4	1035,145,194,124	0,6048,11827,16589
chr1	94610614	94627327	NovelTID_00000308	00204	-	94610614	94627327	0,0,0	4	1035,145,214,124	0,6048,11827,16589
chr1	94612089	94614203	NovelTID_00000068	00042	+	94612089	94614203	0,0,0	2	98,244	0,1870
chr1	95019468	95020630	NovelTID_00000309	00205	-	95019468	95020630	0,0,0	2	253,53	0,1109
chr1	95022410	95025427	NovelTID_00000310	00206	-	95022410	95025427	0,0,0	2	165,467	0,2550
chr1	95097808	95098366	NovelTID_00000069	00043	+	95097808	95098366	0,0,0	2	294,10	0,548
chr1	95911626	95913724	KnowTID_00000115	00107	+	95911626	95913724	0,0,0	1	2098	0
chr1	96694018	96699049	KnowTID_00000116	00108	+	96694018	96699049	0,0,0	4	268,1019,119,159	0,1924,3556,4872
chr1	97363785	97366510	KnowTID_00000117	00109	+	97363785	97366510	0,0,0	1	2725	0
chr1	97478719	97480996	KnowTID_00000504	00356	-	97478719	97480996	0,0,0	1	2277	0
chr1	97479626	97481937	KnowTID_00000505	00356	-	97479626	97481937	0,0,0	1	2311	0
chr1	97571946	97574234	NovelTID_00000070	00044	+	97571946	97574234	0,0,0	2	49,1807	0,481
chr1	97597760	97613095	KnowTID_00000506	00357	-	97597760	97613095	0,0,0	4	313,103,63,282	0,11418,14803,15053
chr1	97878597	97881549	NovelTID_00000311	00207	-	97878597	97881549	0,0,0	2	429,48	0,2904
chr1	97887235	97918335	KnowTID_00000507	00358	-	97887235	97918335	0,0,0	3	245,79,32	0,4755,31068
chr1	98209818	98212112	KnowTID_00000118	00110	+	98209818	98212112	0,0,0	1	2294	0
chr1	98439635	98453280	KnowTID_00000508	00359	-	98439635	98453280	0,0,0	2	1276,73	0,13572
chr1	98768797	98777807	KnowTID_00000119	00111	+	98768797	98777807	0,0,0	2	448,3397	0,5613
chr1	98769029	98777826	KnowTID_00000120	00111	+	98769029	98777826	0,0,0	3	216,1316,1572	0,5381,7225
chr1	99432046	99447211	NovelTID_00000071	00045	+	99432046	99447211	0,0,0	2	111,195	0,14970
chr1	99440840	99442025	KnowTID_00000509	00360	-	99440840	99442025	0,0,0	1	1185	0
chr1	99502894	99505201	KnowTID_00000510	00361	-	99502894	99505201	0,0,0	1	2307	0
chr1	99533968	99534951	KnowTID_00000511	00362	-	99533968	99534951	0,0,0	1	983	0
chr1	100028043	100041232	KnowTID_00000121	00112	+	100028043	100041232	0,0,0	3	238,90,1359	0,2045,11830
chr1	100069875	100088943	NovelTID_00000072	00046	+	100069875	100088943	0,0,0	3	441,137,5523	0,12131,13545
chr1	100069875	100090652	NovelTID_00000073	00046	+	100069875	100090652	0,0,0	4	441,92,137,7232	0,1776,12131,13545
chr1	100486129	100662390	KnowTID_00000122	00113	+	100486129	100662390	0,0,0	3	105,57,993	0,15578,175268
chr1	100979309	101548210	KnowTID_00000123	00114	+	100979309	101548210	0,0,0	4	196,5,11,519	0,461,491404,568382
chr1	101316597	101318143	NovelTID_00000312	00208	-	101316597	101318143	0,0,0	2	453,334	0,1212
chr1	102824479	102825974	NovelTID_00000313	00209	-	102824479	102825974	0,0,0	2	293,35	0,1460
chr1	103052344	103071779	KnowTID_00000124	00115	+	103052344	103071779	0,0,0	3	245,75,566	0,12863,18869
chr1	103338176	103338675	NovelTID_00000074	00047	+	103338176	103338675	0,0,0	2	28,328	0,171
chr1	105122440	105125856	KnowTID_00000125	00116	+	105122440	105125856	0,0,0	1	3416	0
chr1	105620921	105623810	KnowTID_00000126	00117	+	105620921	105623810	0,0,0	1	2889	0
chr1	107011439	107029055	NovelTID_00000314	00210	-	107011439	107029055	0,0,0	2	25,538	0,17078
chr1	107021003	107024298	NovelTID_00000075	00048	+	107021003	107024298	0,0,0	2	168,535	0,2760
chr1	107141786	107159149	NovelTID_00000315	00211	-	107141786	107159149	0,0,0	3	43,118,53	0,11978,17310
chr1	107767559	107774099	NovelTID_00000076	00049	+	107767559	107774099	0,0,0	2	42,413	0,6127
chr1	107784209	107787589	KnowTID_00000512	00363	-	107784209	107787589	0,0,0	1	3380	0
chr1	107868242	107869318	NovelTID_00000077	00050	+	107868242	107869318	0,0,0	2	269,260	0,816
chr1	107885802	107886829	KnowTID_00000513	00364	-	107885802	107886829	0,0,0	1	1027	0
chr1	107969160	107972471	KnowTID_00000514	00365	-	107969160	107972471	0,0,0	1	3311	0
chr1	108049201	108068101	KnowTID_00000515	00366	-	108049201	108068101	0,0,0	3	123,237,185	0,10938,18715
chr1	108296754	108298564	KnowTID_00000516	00367	-	108296754	108298564	0,0,0	2	1384,83	0,1727
chr1	108420614	108424032	NovelTID_00000078	00051	+	108420614	108424032	0,0,0	2	155,402	0,3016
chr1	108694141	108695547	KnowTID_00000127	00118	+	108694141	108695547	0,0,0	1	1406	0
chr1	109002436	109004424	KnowTID_00000128	00119	+	109002436	109004424	0,0,0	1	1988	0
chr1	109813835	109847524	KnowTID_00000129	00120	+	109813835	109847524	0,0,0	5	94,114,108,104,1799	0,19450,20299,24449,31890
chr1	109813835	109847524	KnowTID_00000130	00120	+	109813835	109847524	0,0,0	4	94,108,104,1799	0,20299,24449,31890
chr1	109833283	109924914	KnowTID_00000131	00120	+	109833283	109924914	0,0,0	4	116,108,95,1315	0,851,25612,90316
chr1	109997804	109999671	KnowTID_00000517	00368	-	109997804	109999671	0,0,0	1	1867	0
chr1	110313653	110316409	KnowTID_00000132	00121	+	110313653	110316409	0,0,0	1	2756	0
chr1	112072295	112072862	KnowTID_00000133	00122	+	112072295	112072862	0,0,0	1	567	0
chr1	113040991	113044019	KnowTID_00000518	00369	-	113040991	113044019	0,0,0	1	3028	0
chr1	113714268	113715653	KnowTID_00000519	00370	-	113714268	113715653	0,0,0	1	1385	0
chr1	114294639	114297043	KnowTID_00000520	00371	-	114294639	114297043	0,0,0	1	2404	0
chr1	114751307	114752366	NovelTID_00000079	00052	+	114751307	114752366	0,0,0	2	52,198	0,861
chr1	115109365	115158467	NovelTID_00000316	00212	-	115109365	115158467	0,0,0	3	505,72,193	0,5261,48909
chr1	115340403	115340856	NovelTID_00000080	00053	+	115340403	115340856	0,0,0	2	107,281	0,172
chr1	115375723	115381593	KnowTID_00000134	00123	+	115375723	115381593	0,0,0	4	1361,742,2021,181	0,1369,2120,5689
chr1	115742332	115743925	NovelTID_00000081	00054	+	115742332	115743925	0,0,0	2	912,93	0,1500
chr1	115787961	115860711	KnowTID_00000521	00372	-	115787961	115860711	0,0,0	3	664,29,316	0,17950,72434
chr1	117019547	117023379	NovelTID_00000317	00213	-	117019547	117023379	0,0,0	2	80,280	0,3552
chr1	117565564	117581196	KnowTID_00000522	00373	-	117565564	117581196	0,0,0	5	856,47,214,180,45	0,2180,10631,14410,15587
chr1	118480212	118482871	KnowTID_00000135	00124	+	118480212	118482871	0,0,0	2	1859,791	0,1868
chr1	119451579	119454268	KnowTID_00000523	00374	-	119451579	119454268	0,0,0	1	2689	0
chr1	119848148	119851110	KnowTID_00000524	00375	-	119848148	119851110	0,0,0	1	2962	0
chr1	120180408	120181800	KnowTID_00000525	00376	-	120180408	120181800	0,0,0	1	1392	0
chr1	120253888	120260026	KnowTID_00000136	00125	+	120253888	120260026	0,0,0	3	1140,179,847	0,2465,5291
chr1	120508104	120509255	KnowTID_00000137	00126	+	120508104	120509255	0,0,0	1	1151	0
chr1	120636130	120637029	NovelTID_00000318	00214	-	120636130	120637029	0,0,0	2	12,555	0,344
chr1	120951046	120952912	KnowTID_00000138	00127	+	120951046	120952912	0,0,0	1	1866	0
chr1	120955045	120956421	KnowTID_00000139	00128	+	120955045	120956421	0,0,0	1	1376	0
chr1	120973982	120982657	KnowTID_00000140	00129	+	120973982	120982657	0,0,0	3	124,128,38	0,6619,8637
chr1	120980422	120982657	KnowTID_00000141	00129	+	120980422	120982657	0,0,0	3	95,128,38	0,179,2197
chr1	121114535	121120192	NovelTID_00000319	00215	-	121114535	121120192	0,0,0	2	520,46	0,5611
chr1	121202129	121217172	KnowTID_00000142	00130	+	121202129	121217172	0,0,0	4	155,219,462,1284	0,826,4156,13759
chr1	121202129	121217172	KnowTID_00000143	00130	+	121202129	121217172	0,0,0	4	155,165,462,1284	0,880,4156,13759
chr1	121225776	121235150	KnowTID_00000144	00131	+	121225776	121235150	0,0,0	2	182,1187	0,8187
chr1	121225776	121282158	KnowTID_00000145	00131	+	121225776	121282158	0,0,0	3	182,114,2405	0,51959,53977
chr1	121335663	121337253	NovelTID_00000082	00055	+	121335663	121337253	0,0,0	2	51,1274	0,316
chr1	121336824	121340928	KnowTID_00000526	00377	-	121336824	121340928	0,0,0	2	372,315	0,3789
chr1	121339726	121342123	KnowTID_00000146	00132	+	121339726	121342123	0,0,0	3	28,294,319	0,908,2078
chr1	121340613	121342123	KnowTID_00000147	00132	+	121340613	121342123	0,0,0	2	315,319	0,1191
chr1	121549045	121551453	KnowTID_00000527	00378	-	121549045	121551453	0,0,0	1	2408	0
chr1	121799706	121803474	KnowTID_00000148	00133	+	121799706	121803474	0,0,0	4	143,305,123,204	0,729,1514,3564
chr1	121990121	121991007	NovelTID_00000083	00056	+	121990121	121991007	0,0,0	2	299,365	0,521
chr1	122332381	122335034	KnowTID_00000149	00134	+	122332381	122335034	0,0,0	2	315,1064	0,1589
chr1	122518316	122586980	KnowTID_00000150	00135	+	122518316	122586980	0,0,0	7	140,195,136,59,153,155,295	0,41644,57244,57960,66882,67303,68369
chr1	122655020	122660098	NovelTID_00000084	00057	+	122655020	122660098	0,0,0	3	50,191,160	0,1565,4918
chr1	122659352	122660098	NovelTID_00000085	00057	+	122659352	122660098	0,0,0	2	291,160	0,586
chr1	122765572	122768674	KnowTID_00000151	00136	+	122765572	122768674	0,0,0	1	3102	0
chr1	122983952	123015312	KnowTID_00000152	00137	+	122983952	123015312	0,0,0	4	181,49,104,1427	0,11663,26382,29933
chr1	122983952	123017701	KnowTID_00000153	00137	+	122983952	123017701	0,0,0	5	181,49,104,610,652	0,11663,26382,32482,33097
chr1	122983952	123017701	KnowTID_00000154	00137	+	122983952	123017701	0,0,0	4	181,49,610,652	0,11663,32482,33097
chr1	122983952	123034149	KnowTID_00000155	00137	+	122983952	123034149	0,0,0	5	181,49,104,610,352	0,11663,26382,32482,49845
chr1	122983952	123034149	KnowTID_00000156	00137	+	122983952	123034149	0,0,0	4	181,49,610,352	0,11663,32482,49845
chr1	122983981	123017552	KnowTID_00000157	00137	+	122983981	123017552	0,0,0	5	152,49,104,157,1118	0,11634,26353,29904,32453
chr1	122984050	123075018	KnowTID_00000158	00137	+	122984050	123075018	0,0,0	3	83,264,590	0,49727,90378
chr1	122984103	122985509	KnowTID_00000159	00137	+	122984103	122985509	0,0,0	2	30,1166	0,240
chr1	123010219	123015312	KnowTID_00000160	00137	+	123010219	123015312	0,0,0	2	219,1427	0,3666
chr1	123010219	123017701	KnowTID_00000161	00137	+	123010219	123017701	0,0,0	3	219,610,652	0,6215,6830
chr1	123010219	123034149	KnowTID_00000162	00137	+	123010219	123034149	0,0,0	3	219,610,352	0,6215,23578
chr1	123015317	123016400	KnowTID_00000163	00138	+	123015317	123016400	0,0,0	1	1083	0
chr1	123196713	123197408	KnowTID_00000528	00379	-	123196713	123197408	0,0,0	1	695	0
chr1	123233321	123235491	KnowTID_00000164	00139	+	123233321	123235491	0,0,0	1	2170	0
chr1	123251692	123256477	KnowTID_00000529	00380	-	123251692	123256477	0,0,0	2	1652,89	0,4696
chr1	123603091	123603840	KnowTID_00000165	00140	+	123603091	123603840	0,0,0	1	749	0
chr1	124101721	124148757	KnowTID_00000166	00141	+	124101721	124148757	0,0,0	6	112,108,99,90,191,1009	0,23667,26982,43865,45192,46027
chr1	124418325	124419453	KnowTID_00000167	00142	+	124418325	124419453	0,0,0	2	540,576	0,552
chr1	124762618	124764350	KnowTID_00000168	00143	+	124762618	124764350	0,0,0	1	1732	0
chr1	125218047	125220660	KnowTID_00000530	00381	-	125218047	125220660	0,0,0	1	2613	0
chr1	126272154	126275819	KnowTID_00000531	00382	-	126272154	126275819	0,0,0	1	3665	0
chr1	126402333	126742616	KnowTID_00000532	00383	-	126402333	126742616	0,0,0	3	1055,67,321	0,4474,339962
chr1	126721278	126724305	KnowTID_00000533	00384	-	126721278	126724305	0,0,0	1	3027	0
chr1	126870358	127215446	KnowTID_00000169	00144	+	126870358	127215446	0,0,0	11	19,11,16,3,106,320,164,44,233,510,314	0,246502,291835,291903,343253,343374,343699,343872,343930,344259,344774
chr1	127086858	127094032	KnowTID_00000534	00385	-	127086858	127094032	0,0,0	2	398,306	0,6868
chr1	127392139	127394380	NovelTID_00000320	00216	-	127392139	127394380	0,0,0	2	369,1656	0,585
chr1	127420354	127421956	KnowTID_00000535	00386	-	127420354	127421956	0,0,0	1	1602	0
chr1	128731600	128735870	NovelTID_00000086	00058	+	128731600	128735870	0,0,0	2	333,1380	0,2890
chr1	128768779	128773166	KnowTID_00000536	00387	-	128768779	128773166	0,0,0	2	174,213	0,4174
chr1	129575501	129576125	KnowTID_00000537	00388	-	129575501	129576125	0,0,0	1	624	0
chr1	129754471	129755600	NovelTID_00000321	00217	-	129754471	129755600	0,0,0	2	580,60	0,1069
chr1	129754471	129755600	NovelTID_00000322	00217	-	129754471	129755600	0,0,0	2	772,60	0,1069
chr1	129844643	129846808	KnowTID_00000538	00389	-	129844643	129846808	0,0,0	1	2165	0
chr1	129847158	129847852	NovelTID_00000323	00218	-	129847158	129847852	0,0,0	2	33,611	0,83
chr1	130324507	130325313	NovelTID_00000087	00059	+	130324507	130325313	0,0,0	2	315,45	0,761
chr1	130516676	130519076	NovelTID_00000088	00060	+	130516676	130519076	0,0,0	2	32,819	0,1581
chr1	130572233	130573677	NovelTID_00000089	00061	+	130572233	130573677	0,0,0	2	103,180	0,1264
chr1	130667175	130670998	KnowTID_00000539	00390	-	130667175	130670998	0,0,0	2	2261,1206	0,2617
chr1	130669694	130676646	NovelTID_00000090	00062	+	130669694	130676646	0,0,0	2	75,360	0,6592
chr1	132364548	132366802	KnowTID_00000170	00145	+	132364548	132366802	0,0,0	1	2254	0
chr1	132370319	132371890	KnowTID_00000171	00146	+	132370319	132371890	0,0,0	1	1571	0
chr1	132421015	132444176	NovelTID_00000324	00219	-	132421015	132444176	0,0,0	2	75,611	0,22550
chr1	132662960	132681010	KnowTID_00000172	00147	+	132662960	132681010	0,0,0	4	196,145,165,2322	0,372,14558,15728
chr1	132681112	132682388	NovelTID_00000091	00063	+	132681112	132682388	0,0,0	2	611,560	0,716
chr1	132681112	132697286	NovelTID_00000092	00063	+	132681112	132697286	0,0,0	3	611,183,360	0,716,15814
chr1	133463643	133464514	NovelTID_00000325	00220	-	133463643	133464514	0,0,0	2	656,50	0,821
chr1	133621055	133623130	NovelTID_00000326	00221	-	133621055	133623130	0,0,0	2	634,11	0,2064
chr1	133628326	133629228	NovelTID_00000327	00222	-	133628326	133629228	0,0,0	2	578,51	0,851
chr1	133796297	133796792	NovelTID_00000328	00223	-	133796297	133796792	0,0,0	2	343,99	0,396
chr1	133975552	133976392	KnowTID_00000173	00148	+	133975552	133976392	0,0,0	1	840	0
chr1	134000463	134005200	KnowTID_00000174	00149	+	134000463	134005200	0,0,0	1	4737	0
chr1	134238599	134246576	KnowTID_00000175	00150	+	134238599	134246576	0,0,0	4	45,91,4947,530	0,288,2293,7447
chr1	134371901	134373602	KnowTID_00000540	00391	-	134371901	134373602	0,0,0	1	1701	0
chr1	134683638	134688413	NovelTID_00000093	00064	+	134683638	134688413	0,0,0	4	192,87,105,156	0,292,688,4619
chr1	134768743	134773861	NovelTID_00000329	00224	-	134768743	134773861	0,0,0	2	64,213	0,4905
chr1	134840088	134841897	KnowTID_00000541	00392	-	134840088	134841897	0,0,0	1	1809	0
chr1	134858229	134869291	KnowTID_00000542	00393	-	134858229	134869291	0,0,0	3	1504,30,494	0,9365,10568
chr1	135082318	135084492	KnowTID_00000176	00151	+	135082318	135084492	0,0,0	1	2174	0
chr1	135406575	135407401	NovelTID_00000330	00225	-	135406575	135407401	0,0,0	2	653,47	0,779
chr1	135506987	135510999	KnowTID_00000177	00152	+	135506987	135510999	0,0,0	2	568,178	0,3834
chr1	135560987	135573755	KnowTID_00000178	00153	+	135560987	135573755	0,0,0	2	310,1188	0,11580
chr1	135564357	135573755	KnowTID_00000179	00153	+	135564357	135573755	0,0,0	2	288,1188	0,8210
chr1	135564357	135573755	KnowTID_00000180	00153	+	135564357	135573755	0,0,0	2	327,1188	0,8210
chr1	135571268	135573755	KnowTID_00000181	00153	+	135571268	135573755	0,0,0	2	733,1188	0,1299
chr1	135572243	135573755	KnowTID_00000182	00153	+	135572243	135573755	0,0,0	2	228,1188	0,324
chr1	135726104	135727802	KnowTID_00000183	00154	+	135726104	135727802	0,0,0	1	1698	0
chr1	135731765	135734949	KnowTID_00000184	00155	+	135731765	135734949	0,0,0	2	56,1287	0,1897
chr1	135830033	135841672	NovelTID_00000094	00065	+	135830033	135841672	0,0,0	2	225,1394	0,10245
chr1	135858738	135868515	KnowTID_00000185	00156	+	135858738	135868515	0,0,0	2	155,2433	0,7344
chr1	135874038	135878959	NovelTID_00000095	00066	+	135874038	135878959	0,0,0	2	133,2326	0,2595
chr1	135883365	135884059	KnowTID_00000186	00157	+	135883365	135884059	0,0,0	1	694	0
chr1	135956204	135959274	NovelTID_00000331	00226	-	135956204	135959274	0,0,0	2	826,1905	0,1165
chr1	135956374	135959686	NovelTID_00000332	00226	-	135956374	135959686	0,0,0	2	656,1167	0,2145
chr1	135956559	135957938	NovelTID_00000333	00226	-	135956559	135957938	0,0,0	2	471,127	0,1252
chr1	135992981	135995734	KnowTID_00000543	00394	-	135992981	135995734	0,0,0	1	2753	0
chr1	136061253	136063517	NovelTID_00000096	00067	+	136061253	136063517	0,0,0	3	249,86,142	0,1888,2122
chr1	136168554	136170271	NovelTID_00000334	00227	-	136168554	136170271	0,0,0	2	544,124	0,1593
chr1	136332204	136336174	KnowTID_00000187	00158	+	136332204	136336174	0,0,0	2	243,3073	0,897
chr1	136351068	136352050	KnowTID_00000544	00395	-	136351068	136352050	0,0,0	1	982	0
chr1	136538830	136543097	KnowTID_00000545	00396	-	136538830	136543097	0,0,0	2	2305,72	0,4195
chr1	137656609	137657704	NovelTID_00000097	00068	+	137656609	137657704	0,0,0	2	47,292	0,803
chr1	137656609	137662417	NovelTID_00000098	00068	+	137656609	137662417	0,0,0	3	47,279,951	0,803,4857
chr1	137758467	137759098	NovelTID_00000335	00228	-	137758467	137759098	0,0,0	2	270,84	0,547
chr1	138144238	138147058	KnowTID_00000188	00159	+	138144238	138147058	0,0,0	2	783,1024	0,1796
chr1	138144561	138146196	KnowTID_00000546	00397	-	138144561	138146196	0,0,0	1	1635	0
chr1	138149247	138152423	KnowTID_00000547	00398	-	138149247	138152423	0,0,0	2	2274,246	0,2930
chr1	138272422	138297893	NovelTID_00000099	00069	+	138272422	138297893	0,0,0	2	23,2242	0,23229
chr1	138463238	138510807	KnowTID_00000189	00160	+	138463238	138510807	0,0,0	3	141,91,65	0,32178,47504
chr1	138463238	138521386	KnowTID_00000190	00160	+	138463238	138521386	0,0,0	5	141,91,42,49,179	0,32178,56666,57622,57969
chr1	138463238	138521386	KnowTID_00000191	00160	+	138463238	138521386	0,0,0	4	141,91,42,179	0,32178,56666,57969
chr1	138473514	138476054	KnowTID_00000548	00399	-	138473514	138476054	0,0,0	2	228,2186	0,354
chr1	138478420	138481754	KnowTID_00000192	00161	+	138478420	138481754	0,0,0	2	1745,1308	0,2026
chr1	138499609	138502045	KnowTID_00000549	00400	-	138499609	138502045	0,0,0	2	1187,370	0,2066
chr1	138518674	138521227	KnowTID_00000550	00401	-	138518674	138521227	0,0,0	2	2297,142	0,2411
chr1	138566250	138586093	KnowTID_00000193	00162	+	138566250	138586093	0,0,0	5	41,145,1014,94,773	0,5465,6574,11795,19070
chr1	138566250	138586093	KnowTID_00000194	00162	+	138566250	138586093	0,0,0	4	41,145,1014,773	0,5465,6574,19070
chr1	138566250	138586093	KnowTID_00000195	00162	+	138566250	138586093	0,0,0	5	41,145,1019,94,773	0,5465,6574,11795,19070
chr1	138566250	138586093	KnowTID_00000196	00162	+	138566250	138586093	0,0,0	5	41,145,139,94,773	0,5465,7449,11795,19070
chr1	138566250	138586093	KnowTID_00000197	00162	+	138566250	138586093	0,0,0	4	41,145,139,773	0,5465,7449,19070
chr1	138566250	138586093	KnowTID_00000198	00162	+	138566250	138586093	0,0,0	5	41,145,144,94,773	0,5465,7449,11795,19070
chr1	138566250	138586093	KnowTID_00000199	00162	+	138566250	138586093	0,0,0	4	41,145,94,773	0,5465,11795,19070
chr1	138566250	138586093	KnowTID_00000200	00162	+	138566250	138586093	0,0,0	3	41,145,773	0,5465,19070
chr1	138566250	138587091	KnowTID_00000201	00162	+	138566250	138587091	0,0,0	6	41,145,1014,94,67,368	0,5465,6574,11795,19070,20473
chr1	138566250	138587091	KnowTID_00000202	00162	+	138566250	138587091	0,0,0	5	41,145,1014,67,368	0,5465,6574,19070,20473
chr1	138566250	138587091	KnowTID_00000203	00162	+	138566250	138587091	0,0,0	6	41,145,1019,94,67,368	0,5465,6574,11795,19070,20473
chr1	138566250	138587091	KnowTID_00000204	00162	+	138566250	138587091	0,0,0	6	41,145,139,94,67,368	0,5465,7449,11795,19070,20473
chr1	138566250	138587091	KnowTID_00000205	00162	+	138566250	138587091	0,0,0	5	41,145,139,67,368	0,5465,7449,19070,20473
chr1	138566250	138587091	KnowTID_00000206	00162	+	138566250	138587091	0,0,0	6	41,145,144,94,67,368	0,5465,7449,11795,19070,20473
chr1	138566250	138587091	KnowTID_00000207	00162	+	138566250	138587091	0,0,0	5	41,145,94,67,368	0,5465,11795,19070,20473
chr1	138566250	138587091	KnowTID_00000208	00162	+	138566250	138587091	0,0,0	4	41,145,67,368	0,5465,19070,20473
chr1	138566250	138587379	KnowTID_00000209	00162	+	138566250	138587379	0,0,0	6	41,145,1014,94,67,266	0,5465,6574,11795,19070,20863
chr1	138566250	138587379	KnowTID_00000210	00162	+	138566250	138587379	0,0,0	5	41,145,1014,67,266	0,5465,6574,19070,20863
chr1	138566250	138587379	KnowTID_00000211	00162	+	138566250	138587379	0,0,0	6	41,145,1019,94,67,266	0,5465,6574,11795,19070,20863
chr1	138566250	138587379	KnowTID_00000212	00162	+	138566250	138587379	0,0,0	6	41,145,139,94,67,266	0,5465,7449,11795,19070,20863
chr1	138566250	138587379	KnowTID_00000213	00162	+	138566250	138587379	0,0,0	5	41,145,139,67,266	0,5465,7449,19070,20863
chr1	138566250	138587379	KnowTID_00000214	00162	+	138566250	138587379	0,0,0	6	41,145,144,94,67,266	0,5465,7449,11795,19070,20863
chr1	138566250	138587379	KnowTID_00000215	00162	+	138566250	138587379	0,0,0	5	41,145,94,67,266	0,5465,11795,19070,20863
chr1	138566250	138587379	KnowTID_00000216	00162	+	138566250	138587379	0,0,0	4	41,145,67,266	0,5465,19070,20863
chr1	138567301	138586093	KnowTID_00000217	00162	+	138567301	138586093	0,0,0	5	208,145,1014,94,773	0,4414,5523,10744,18019
chr1	138567301	138586093	KnowTID_00000218	00162	+	138567301	138586093	0,0,0	4	208,145,1014,773	0,4414,5523,18019
chr1	138567301	138586093	KnowTID_00000219	00162	+	138567301	138586093	0,0,0	5	208,145,1019,94,773	0,4414,5523,10744,18019
chr1	138567301	138586093	KnowTID_00000220	00162	+	138567301	138586093	0,0,0	5	208,145,139,94,773	0,4414,6398,10744,18019
chr1	138567301	138586093	KnowTID_00000221	00162	+	138567301	138586093	0,0,0	4	208,145,139,773	0,4414,6398,18019
chr1	138567301	138586093	KnowTID_00000222	00162	+	138567301	138586093	0,0,0	5	208,145,144,94,773	0,4414,6398,10744,18019
chr1	138567301	138586093	KnowTID_00000223	00162	+	138567301	138586093	0,0,0	4	208,145,94,773	0,4414,10744,18019
chr1	138567301	138586093	KnowTID_00000224	00162	+	138567301	138586093	0,0,0	3	208,145,773	0,4414,18019
chr1	138567301	138586093	KnowTID_00000225	00162	+	138567301	138586093	0,0,0	5	208,142,1014,94,773	0,4417,5523,10744,18019
chr1	138567301	138586093	KnowTID_00000226	00162	+	138567301	138586093	0,0,0	4	208,142,1014,773	0,4417,5523,18019
chr1	138567301	138586093	KnowTID_00000227	00162	+	138567301	138586093	0,0,0	5	208,142,1019,94,773	0,4417,5523,10744,18019
chr1	138567301	138586093	KnowTID_00000228	00162	+	138567301	138586093	0,0,0	5	208,142,139,94,773	0,4417,6398,10744,18019
chr1	138567301	138586093	KnowTID_00000229	00162	+	138567301	138586093	0,0,0	4	208,142,139,773	0,4417,6398,18019
chr1	138567301	138586093	KnowTID_00000230	00162	+	138567301	138586093	0,0,0	5	208,142,144,94,773	0,4417,6398,10744,18019
chr1	138567301	138586093	KnowTID_00000231	00162	+	138567301	138586093	0,0,0	4	208,142,94,773	0,4417,10744,18019
chr1	138567301	138586093	KnowTID_00000232	00162	+	138567301	138586093	0,0,0	3	208,142,773	0,4417,18019
chr1	138567301	138587091	KnowTID_00000233	00162	+	138567301	138587091	0,0,0	5	208,145,1014,67,368	0,4414,5523,18019,19422
chr1	138567301	138587091	KnowTID_00000234	00162	+	138567301	138587091	0,0,0	6	208,145,1019,94,67,368	0,4414,5523,10744,18019,19422
chr1	138567301	138587091	KnowTID_00000235	00162	+	138567301	138587091	0,0,0	5	208,145,139,67,368	0,4414,6398,18019,19422
chr1	138567301	138587091	KnowTID_00000236	00162	+	138567301	138587091	0,0,0	6	208,145,144,94,67,368	0,4414,6398,10744,18019,19422
chr1	138567301	138587091	KnowTID_00000237	00162	+	138567301	138587091	0,0,0	5	208,145,94,67,368	0,4414,10744,18019,19422
chr1	138567301	138587091	KnowTID_00000238	00162	+	138567301	138587091	0,0,0	4	208,145,67,368	0,4414,18019,19422
chr1	138567301	138587091	KnowTID_00000239	00162	+	138567301	138587091	0,0,0	5	208,142,1014,67,368	0,4417,5523,18019,19422
chr1	138567301	138587091	KnowTID_00000240	00162	+	138567301	138587091	0,0,0	6	208,142,1019,94,67,368	0,4417,5523,10744,18019,19422
chr1	138567301	138587091	KnowTID_00000241	00162	+	138567301	138587091	0,0,0	5	208,142,139,67,368	0,4417,6398,18019,19422
chr1	138567301	138587091	KnowTID_00000242	00162	+	138567301	138587091	0,0,0	6	208,142,144,94,67,368	0,4417,6398,10744,18019,19422
chr1	138567301	138587091	KnowTID_00000243	00162	+	138567301	138587091	0,0,0	5	208,142,94,67,368	0,4417,10744,18019,19422
chr1	138567301	138587091	KnowTID_00000244	00162	+	138567301	138587091	0,0,0	4	208,142,67,368	0,4417,18019,19422
chr1	138567301	138587379	KnowTID_00000245	00162	+	138567301	138587379	0,0,0	5	208,145,1014,67,266	0,4414,5523,18019,19812
chr1	138567301	138587379	KnowTID_00000246	00162	+	138567301	138587379	0,0,0	6	208,145,1019,94,67,266	0,4414,5523,10744,18019,19812
chr1	138567301	138587379	KnowTID_00000247	00162	+	138567301	138587379	0,0,0	5	208,145,139,67,266	0,4414,6398,18019,19812
chr1	138567301	138587379	KnowTID_00000248	00162	+	138567301	138587379	0,0,0	6	208,145,144,94,67,266	0,4414,6398,10744,18019,19812
chr1	138567301	138587379	KnowTID_00000249	00162	+	138567301	138587379	0,0,0	5	208,145,94,67,266	0,4414,10744,18019,19812
chr1	138567301	138587379	KnowTID_00000250	00162	+	138567301	138587379	0,0,0	4	208,145,67,266	0,4414,18019,19812
chr1	138567301	138587379	KnowTID_00000251	00162	+	138567301	138587379	0,0,0	5	208,142,1014,67,266	0,4417,5523,18019,19812
chr1	138567301	138587379	KnowTID_00000252	00162	+	138567301	138587379	0,0,0	6	208,142,1019,94,67,266	0,4417,5523,10744,18019,19812
chr1	138567301	138587379	KnowTID_00000253	00162	+	138567301	138587379	0,0,0	5	208,142,139,67,266	0,4417,6398,18019,19812
chr1	138567301	138587379	KnowTID_00000254	00162	+	138567301	138587379	0,0,0	6	208,142,144,94,67,266	0,4417,6398,10744,18019,19812
chr1	138567301	138587379	KnowTID_00000255	00162	+	138567301	138587379	0,0,0	5	208,142,94,67,266	0,4417,10744,18019,19812
chr1	138567301	138587379	KnowTID_00000256	00162	+	138567301	138587379	0,0,0	4	208,142,67,266	0,4417,18019,19812
chr1	138569506	138586093	KnowTID_00000257	00162	+	138569506	138586093	0,0,0	5	126,145,1014,94,773	0,2209,3318,8539,15814
chr1	138569506	138586093	KnowTID_00000258	00162	+	138569506	138586093	0,0,0	4	126,145,1014,773	0,2209,3318,15814
chr1	138569506	138586093	KnowTID_00000259	00162	+	138569506	138586093	0,0,0	5	126,145,1019,94,773	0,2209,3318,8539,15814
chr1	138569506	138586093	KnowTID_00000260	00162	+	138569506	138586093	0,0,0	5	126,145,139,94,773	0,2209,4193,8539,15814
chr1	138569506	138586093	KnowTID_00000261	00162	+	138569506	138586093	0,0,0	4	126,145,139,773	0,2209,4193,15814
chr1	138569506	138586093	KnowTID_00000262	00162	+	138569506	138586093	0,0,0	5	126,145,144,94,773	0,2209,4193,8539,15814
chr1	138569506	138586093	KnowTID_00000263	00162	+	138569506	138586093	0,0,0	4	126,145,94,773	0,2209,8539,15814
chr1	138569506	138586093	KnowTID_00000264	00162	+	138569506	138586093	0,0,0	3	126,145,773	0,2209,15814
chr1	138569506	138587091	KnowTID_00000265	00162	+	138569506	138587091	0,0,0	6	126,145,1014,94,67,368	0,2209,3318,8539,15814,17217
chr1	138569506	138587091	KnowTID_00000266	00162	+	138569506	138587091	0,0,0	5	126,145,1014,67,368	0,2209,3318,15814,17217
chr1	138569506	138587091	KnowTID_00000267	00162	+	138569506	138587091	0,0,0	6	126,145,1019,94,67,368	0,2209,3318,8539,15814,17217
chr1	138569506	138587091	KnowTID_00000268	00162	+	138569506	138587091	0,0,0	6	126,145,139,94,67,368	0,2209,4193,8539,15814,17217
chr1	138569506	138587091	KnowTID_00000269	00162	+	138569506	138587091	0,0,0	5	126,145,139,67,368	0,2209,4193,15814,17217
chr1	138569506	138587091	KnowTID_00000270	00162	+	138569506	138587091	0,0,0	6	126,145,144,94,67,368	0,2209,4193,8539,15814,17217
chr1	138569506	138587091	KnowTID_00000271	00162	+	138569506	138587091	0,0,0	5	126,145,94,67,368	0,2209,8539,15814,17217
chr1	138569506	138587091	KnowTID_00000272	00162	+	138569506	138587091	0,0,0	4	126,145,67,368	0,2209,15814,17217
chr1	138569506	138587379	KnowTID_00000273	00162	+	138569506	138587379	0,0,0	6	126,145,1014,94,67,266	0,2209,3318,8539,15814,17607
chr1	138569506	138587379	KnowTID_00000274	00162	+	138569506	138587379	0,0,0	5	126,145,1014,67,266	0,2209,3318,15814,17607
chr1	138569506	138587379	KnowTID_00000275	00162	+	138569506	138587379	0,0,0	6	126,145,1019,94,67,266	0,2209,3318,8539,15814,17607
chr1	138569506	138587379	KnowTID_00000276	00162	+	138569506	138587379	0,0,0	6	126,145,139,94,67,266	0,2209,4193,8539,15814,17607
chr1	138569506	138587379	KnowTID_00000277	00162	+	138569506	138587379	0,0,0	5	126,145,139,67,266	0,2209,4193,15814,17607
chr1	138569506	138587379	KnowTID_00000278	00162	+	138569506	138587379	0,0,0	6	126,145,144,94,67,266	0,2209,4193,8539,15814,17607
chr1	138569506	138587379	KnowTID_00000279	00162	+	138569506	138587379	0,0,0	5	126,145,94,67,266	0,2209,8539,15814,17607
chr1	138569506	138587379	KnowTID_00000280	00162	+	138569506	138587379	0,0,0	4	126,145,67,266	0,2209,15814,17607
chr1	138575659	138586093	KnowTID_00000281	00162	+	138575659	138586093	0,0,0	3	445,94,773	0,2386,9661
chr1	138575659	138587091	KnowTID_00000282	00162	+	138575659	138587091	0,0,0	4	445,94,67,368	0,2386,9661,11064
chr1	138575659	138587379	KnowTID_00000283	00162	+	138575659	138587379	0,0,0	4	445,94,67,266	0,2386,9661,11454
chr1	138579913	138584490	KnowTID_00000284	00162	+	138579913	138584490	0,0,0	2	137,136	0,4441
chr1	138579913	138587379	KnowTID_00000285	00162	+	138579913	138587379	0,0,0	3	137,67,266	0,5407,7200
chr1	138580131	138586093	KnowTID_00000286	00162	+	138580131	138586093	0,0,0	2	149,773	0,5189
chr1	138580131	138587091	KnowTID_00000287	00162	+	138580131	138587091	0,0,0	3	149,67,368	0,5189,6592
chr1	138592787	138622305	KnowTID_00000288	00163	+	138592787	138622305	0,0,0	5	181,104,108,48,758	0,9328,28360,28581,28760
chr1	138622138	138622719	KnowTID_00000289	00163	+	138622138	138622719	0,0,0	1	581	0
chr1	138631965	138632632	NovelTID_00000336	00229	-	138631965	138632632	0,0,0	2	30,223	0,444
chr1	138641251	138734236	KnowTID_00000551	00402	-	138641251	138734236	0,0,0	7	115,5,16,11,10,86,146	0,156,27564,38455,89524,92649,92839
chr1	139148718	139150634	KnowTID_00000290	00164	+	139148718	139150634	0,0,0	1	1916	0
chr1	139222010	139222419	KnowTID_00000552	00403	-	139222010	139222419	0,0,0	1	409	0
chr1	139266957	139267369	NovelTID_00000337	00230	-	139266957	139267369	0,0,0	2	105,211	0,201
chr1	139660653	139664104	KnowTID_00000553	00404	-	139660653	139664104	0,0,0	1	3451	0
chr1	139684255	139696119	NovelTID_00000100	00070	+	139684255	139696119	0,0,0	6	28,83,65,22,26,3150	0,420,2242,4274,4603,8714
chr1	139685607	139690323	NovelTID_00000101	00070	+	139685607	139690323	0,0,0	4	309,65,22,1465	0,890,2922,3251
chr1	139685607	139690323	NovelTID_00000102	00070	+	139685607	139690323	0,0,0	4	617,65,22,1465	0,890,2922,3251
chr1	139685607	139695014	NovelTID_00000103	00070	+	139685607	139695014	0,0,0	5	309,65,22,26,2045	0,890,2922,3251,7362
chr1	139685607	139695014	NovelTID_00000104	00070	+	139685607	139695014	0,0,0	5	617,65,22,26,2045	0,890,2922,3251,7362
chr1	139685607	139695014	NovelTID_00000105	00070	+	139685607	139695014	0,0,0	3	617,65,2045	0,890,7362
chr1	139685607	139696119	NovelTID_00000106	00070	+	139685607	139696119	0,0,0	3	309,65,3150	0,890,7362
chr1	139688000	139695014	NovelTID_00000107	00070	+	139688000	139695014	0,0,0	3	551,26,2045	0,858,4969
chr1	139708425	139708708	KnowTID_00000291	00165	+	139708425	139708708	0,0,0	1	283	0
chr1	139795165	139795755	KnowTID_00000292	00166	+	139795165	139795755	0,0,0	1	590	0
chr1	139795171	139796306	KnowTID_00000293	00166	+	139795171	139796306	0,0,0	2	959,169	0,966
chr1	139805867	139808934	KnowTID_00000294	00167	+	139805867	139808934	0,0,0	1	3067	0
chr1	139820964	139822956	KnowTID_00000295	00168	+	139820964	139822956	0,0,0	1	1992	0
chr1	139831911	139833923	KnowTID_00000296	00169	+	139831911	139833923	0,0,0	1	2012	0
chr1	139845998	139848251	KnowTID_00000297	00170	+	139845998	139848251	0,0,0	1	2253	0
chr1	139848154	139851220	KnowTID_00000298	00170	+	139848154	139851220	0,0,0	1	3066	0
chr1	139854401	139857204	KnowTID_00000299	00171	+	139854401	139857204	0,0,0	1	2803	0
chr1	139867750	139868892	KnowTID_00000300	00172	+	139867750	139868892	0,0,0	1	1142	0
chr1	139890413	139906360	NovelTID_00000108	00071	+	139890413	139906360	0,0,0	4	3516,323,156,400	0,6355,6986,15547
chr1	140086792	140088670	KnowTID_00000554	00405	-	140086792	140088670	0,0,0	2	128,489	0,1389
chr1	140146980	140156352	NovelTID_00000109	00072	+	140146980	140156352	0,0,0	2	812,41	0,9331
chr1	140158224	140158638	KnowTID_00000301	00173	+	140158224	140158638	0,0,0	1	414	0
chr1	140536671	140578652	KnowTID_00000555	00406	-	140536671	140578652	0,0,0	5	486,66,1160,115,103	0,13560,16717,37721,41878
chr1	140568008	140578652	KnowTID_00000556	00406	-	140568008	140578652	0,0,0	3	314,115,103	0,6384,10541
chr1	140624656	140635739	NovelTID_00000338	00231	-	140624656	140635739	0,0,0	2	664,529	0,10554
chr1	140772850	140773527	KnowTID_00000557	00407	-	140772850	140773527	0,0,0	2	372,36	0,641
chr1	140857019	140859480	KnowTID_00000558	00408	-	140857019	140859480	0,0,0	1	2461	0
chr1	141276028	141299429	KnowTID_00000302	00174	+	141276028	141299429	0,0,0	9	72,116,149,61,100,70,126,56,361	0,1001,1388,12351,18586,19067,19673,22424,23040
chr1	141304856	141310441	KnowTID_00000303	00175	+	141304856	141310441	0,0,0	3	179,102,219	0,2200,5366
chr1	141537504	141550726	NovelTID_00000339	00232	-	141537504	141550726	0,0,0	2	209,55	0,13167
chr1	141546367	141557633	NovelTID_00000340	00233	-	141546367	141557633	0,0,0	2	569,215	0,11051
chr1	141584790	141588950	NovelTID_00000341	00234	-	141584790	141588950	0,0,0	2	1387,1796	0,2364
chr1	142969662	142998338	NovelTID_00000342	00235	-	142969662	142998338	0,0,0	3	1040,200,108	0,5301,28568
chr1	142972175	142998338	NovelTID_00000343	00235	-	142972175	142998338	0,0,0	3	61,200,108	0,2788,26055
chr1	143316613	143319723	KnowTID_00000559	00409	-	143316613	143319723	0,0,0	1	3110	0
chr1	145351673	145364824	NovelTID_00000344	00236	-	145351673	145364824	0,0,0	3	277,56,75	0,927,13076
chr1	145936860	145938300	NovelTID_00000110	00073	+	145936860	145938300	0,0,0	3	125,144,114	0,323,1326
chr1	146121136	146182881	NovelTID_00000111	00074	+	146121136	146182881	0,0,0	3	106,131,177	0,188,61568
chr1	146121267	146182881	NovelTID_00000112	00074	+	146121267	146182881	0,0,0	2	188,177	0,61437
chr1	146797157	146798786	KnowTID_00000304	00176	+	146797157	146798786	0,0,0	1	1629	0
chr1	146867202	146870764	KnowTID_00000560	00410	-	146867202	146870764	0,0,0	1	3562	0
chr1	147170523	147173821	KnowTID_00000561	00411	-	147170523	147173821	0,0,0	2	1016,2240	0,1058
chr1	147170523	147173821	KnowTID_00000562	00411	-	147170523	147173821	0,0,0	3	608,403,2240	0,613,1058
chr1	147888897	147890299	NovelTID_00000113	00075	+	147888897	147890299	0,0,0	2	1266,57	0,1345
chr1	148274027	148342171	KnowTID_00000563	00412	-	148274027	148342171	0,0,0	4	193,92,165,142	0,712,4365,68002
chr1	148324776	148329485	KnowTID_00000564	00413	-	148324776	148329485	0,0,0	1	4709	0
chr1	148936166	148938065	KnowTID_00000305	00177	+	148936166	148938065	0,0,0	1	1899	0
chr1	149362855	149367394	KnowTID_00000306	00178	+	149362855	149367394	0,0,0	2	444,4087	0,452
chr1	150081646	150095508	KnowTID_00000565	00414	-	150081646	150095508	0,0,0	2	1951,126	0,13736
chr1	151255619	151257075	KnowTID_00000566	00415	-	151255619	151257075	0,0,0	1	1456	0
chr1	151257852	151259309	KnowTID_00000567	00416	-	151257852	151259309	0,0,0	1	1457	0
chr1	151279039	151281097	KnowTID_00000568	00417	-	151279039	151281097	0,0,0	1	2058	0
chr1	151282144	151284457	KnowTID_00000569	00418	-	151282144	151284457	0,0,0	1	2313	0
chr1	151916149	151918149	NovelTID_00000114	00076	+	151916149	151918149	0,0,0	2	1412,43	0,1957
chr1	151922002	151946947	KnowTID_00000570	00419	-	151922002	151946947	0,0,0	5	2173,60,226,88,390	0,9707,12247,16731,24555
chr1	151935182	151947004	KnowTID_00000571	00419	-	151935182	151947004	0,0,0	3	1296,88,447	0,3551,11375
chr1	151945310	151947093	KnowTID_00000572	00419	-	151945310	151947093	0,0,0	1	1783	0
chr1	152006172	152012078	KnowTID_00000573	00420	-	152006172	152012078	0,0,0	2	1610,135	0,5771
chr1	152848171	152852415	NovelTID_00000115	00077	+	152848171	152852415	0,0,0	2	109,1364	0,2880
chr1	152927579	152929675	KnowTID_00000574	00421	-	152927579	152929675	0,0,0	1	2096	0
chr1	152985163	152991225	KnowTID_00000307	00179	+	152985163	152991225	0,0,0	7	601,126,52,179,144,157,1381	0,870,1668,3493,4168,4425,4681
chr1	153096265	153098547	NovelTID_00000345	00237	-	153096265	153098547	0,0,0	2	449,859	0,1423
chr1	153096265	153099177	NovelTID_00000346	00237	-	153096265	153099177	0,0,0	3	449,170,305	0,1423,2607
chr1	153117271	153119587	KnowTID_00000575	00422	-	153117271	153119587	0,0,0	3	548,407,602	0,559,1714
chr1	153584363	153589612	NovelTID_00000116	00078	+	153584363	153589612	0,0,0	2	122,400	0,4849
chr1	153596079	153597128	KnowTID_00000576	00423	-	153596079	153597128	0,0,0	2	1010,32	0,1017
chr1	154013560	154018556	NovelTID_00000117	00079	+	154013560	154018556	0,0,0	3	47,96,321	0,3668,4675
chr1	154023723	154060333	NovelTID_00000118	00080	+	154023723	154060333	0,0,0	2	167,128	0,36482
chr1	154067600	154069837	NovelTID_00000119	00081	+	154067600	154069837	0,0,0	2	245,507	0,1730
chr1	154139312	154139658	KnowTID_00000577	00424	-	154139312	154139658	0,0,0	1	346	0
chr1	154750587	154752359	KnowTID_00000308	00180	+	154750587	154752359	0,0,0	1	1772	0
chr1	154783733	154784171	KnowTID_00000309	00181	+	154783733	154784171	0,0,0	1	438	0
chr1	155561783	155563699	KnowTID_00000310	00182	+	155561783	155563699	0,0,0	1	1916	0
chr1	155568369	155584959	KnowTID_00000578	00425	-	155568369	155584959	0,0,0	3	2858,125,354	0,10630,16236
chr1	155612872	155615799	NovelTID_00000120	00082	+	155612872	155615799	0,0,0	2	137,462	0,2465
chr1	155827021	155853510	NovelTID_00000347	00238	-	155827021	155853510	0,0,0	3	667,118,273	0,23943,26216
chr1	155849598	155853510	NovelTID_00000348	00238	-	155849598	155853510	0,0,0	2	1484,273	0,3639
chr1	155849603	155853350	NovelTID_00000349	00238	-	155849603	155853350	0,0,0	2	1479,120	0,3627
chr1	155857219	155872215	NovelTID_00000121	00083	+	155857219	155872215	0,0,0	3	166,164,970	0,753,14026
chr1	155857876	155871828	NovelTID_00000122	00083	+	155857876	155871828	0,0,0	2	260,583	0,13369
chr1	155877654	155878617	NovelTID_00000123	00084	+	155877654	155878617	0,0,0	2	409,33	0,930
chr1	155878783	155880200	NovelTID_00000124	00085	+	155878783	155880200	0,0,0	4	44,128,214,42	0,683,952,1375
chr1	156088650	156104036	KnowTID_00000579	00426	-	156088650	156104036	0,0,0	4	180,56,73,304	0,12755,14519,15082
chr1	156102818	156117546	KnowTID_00000311	00183	+	156102818	156117546	0,0,0	3	73,83,325	0,7365,14403
chr1	156622422	156623129	NovelTID_00000125	00086	+	156622422	156623129	0,0,0	2	530,54	0,653
chr1	156636012	156638488	NovelTID_00000126	00087	+	156636012	156638488	0,0,0	2	335,542	0,1934
chr1	156638884	156639873	KnowTID_00000580	00427	-	156638884	156639873	0,0,0	1	989	0
chr1	156729295	156731154	KnowTID_00000581	00428	-	156729295	156731154	0,0,0	1	1859	0
chr1	156843782	156864202	NovelTID_00000350	00239	-	156843782	156864202	0,0,0	3	64,128,69	0,14647,20351
chr1	156910652	156930396	KnowTID_00000582	00429	-	156910652	156930396	0,0,0	7	336,141,180,188,141,144,2075	0,1357,1693,2199,16180,17117,17669
chr1	157080334	157081565	NovelTID_00000127	00088	+	157080334	157081565	0,0,0	2	565,27	0,1204
chr1	157087820	157088842	KnowTID_00000583	00430	-	157087820	157088842	0,0,0	2	109,288	0,734
chr1	157088554	157089398	KnowTID_00000584	00430	-	157088554	157089398	0,0,0	2	288,510	0,334
chr1	157820447	157821636	KnowTID_00000312	00184	+	157820447	157821636	0,0,0	1	1189	0
chr1	157824963	157825370	KnowTID_00000313	00185	+	157824963	157825370	0,0,0	1	407	0
chr1	158260582	158262015	NovelTID_00000351	00240	-	158260582	158262015	0,0,0	2	259,398	0,1035
chr1	158260582	158262300	NovelTID_00000352	00240	-	158260582	158262300	0,0,0	2	256,683	0,1035
chr1	158332474	158348372	NovelTID_00000353	00241	-	158332474	158348372	0,0,0	2	602,8	0,15890
chr1	158337121	158339155	KnowTID_00000314	00186	+	158337121	158339155	0,0,0	2	63,621	0,1413
chr1	158711920	158718250	NovelTID_00000128	00089	+	158711920	158718250	0,0,0	2	21,551	0,5779
chr1	158869968	158870325	KnowTID_00000315	00187	+	158869968	158870325	0,0,0	1	357	0
chr1	158902947	158920572	NovelTID_00000354	00242	-	158902947	158920572	0,0,0	2	396,1003	0,16622
chr1	158922703	158948895	NovelTID_00000129	00090	+	158922703	158948895	0,0,0	2	3397,10357	0,15835
chr1	158925777	158940073	NovelTID_00000130	00090	+	158925777	158940073	0,0,0	3	323,80,1139	0,12761,13157
chr1	158928151	158940058	NovelTID_00000131	00090	+	158928151	158940058	0,0,0	2	78,1520	0,10387
chr1	158938532	158940073	NovelTID_00000132	00090	+	158938532	158940073	0,0,0	2	86,1139	0,402
chr1	158957619	158967217	NovelTID_00000133	00091	+	158957619	158967217	0,0,0	2	1086,930	0,8668
chr1	158958137	158960096	NovelTID_00000134	00091	+	158958137	158960096	0,0,0	2	568,920	0,1039
chr1	158973677	158975980	KnowTID_00000316	00188	+	158973677	158975980	0,0,0	1	2303	0
chr1	158990027	158995639	NovelTID_00000355	00243	-	158990027	158995639	0,0,0	2	270,27	0,5585
chr1	159057317	159058512	NovelTID_00000135	00092	+	159057317	159058512	0,0,0	2	184,138	0,1057
chr1	159381444	159388523	NovelTID_00000136	00093	+	159381444	159388523	0,0,0	2	1256,6	0,7073
chr1	159636921	159638260	NovelTID_00000137	00094	+	159636921	159638260	0,0,0	2	814,85	0,1254
chr1	159636921	159638260	NovelTID_00000138	00094	+	159636921	159638260	0,0,0	2	810,89	0,1250
chr1	159677161	159679621	NovelTID_00000139	00095	+	159677161	159679621	0,0,0	2	231,1329	0,1131
chr1	159677161	159689598	NovelTID_00000140	00095	+	159677161	159689598	0,0,0	3	231,829,4391	0,1131,8046
chr1	159683194	159689598	NovelTID_00000141	00095	+	159683194	159689598	0,0,0	2	1682,4391	0,2013
chr1	159820005	159823125	NovelTID_00000142	00096	+	159820005	159823125	0,0,0	2	34,273	0,2847
chr1	161065527	161096518	KnowTID_00000317	00189	+	161065527	161096518	0,0,0	4	108,75,163,318	0,13692,30323,30673
chr1	161860314	161861857	KnowTID_00000318	00190	+	161860314	161861857	0,0,0	1	1543	0
chr1	161865169	161870287	NovelTID_00000356	00244	-	161865169	161870287	0,0,0	3	914,194,2221	0,2122,2897
chr1	161867442	161869705	NovelTID_00000357	00244	-	161867442	161869705	0,0,0	3	43,170,158	0,624,2105
chr1	161906911	161908428	NovelTID_00000358	00245	-	161906911	161908428	0,0,0	2	489,479	0,1038
chr1	161906911	161908428	NovelTID_00000359	00245	-	161906911	161908428	0,0,0	2	489,450	0,1067
chr1	161906911	161909253	NovelTID_00000360	00245	-	161906911	161909253	0,0,0	3	489,100,253	0,1038,2089
chr1	161906911	161909253	NovelTID_00000361	00245	-	161906911	161909253	0,0,0	3	489,71,253	0,1067,2089
chr1	161915773	161925342	NovelTID_00000362	00246	-	161915773	161925342	0,0,0	2	1572,235	0,9334
chr1	161915773	161933791	NovelTID_00000363	00246	-	161915773	161933791	0,0,0	3	1572,80,253	0,9750,17765
chr1	161915773	161933791	NovelTID_00000364	00246	-	161915773	161933791	0,0,0	3	1572,86,253	0,9750,17765
chr1	161915773	161933791	NovelTID_00000365	00246	-	161915773	161933791	0,0,0	2	1572,253	0,17765
chr1	161915773	161955385	NovelTID_00000366	00246	-	161915773	161955385	0,0,0	2	1572,135	0,39477
chr1	161915773	161955887	NovelTID_00000367	00246	-	161915773	161955887	0,0,0	3	1572,86,89	0,9750,40025
chr1	161915773	161955887	NovelTID_00000368	00246	-	161915773	161955887	0,0,0	2	1572,89	0,40025
chr1	161915997	161955887	NovelTID_00000369	00246	-	161915997	161955887	0,0,0	3	1348,249,89	0,17541,39801
chr1	162143103	162144018	KnowTID_00000319	00191	+	162143103	162144018	0,0,0	1	915	0
chr1	162143824	162144947	KnowTID_00000320	00191	+	162143824	162144947	0,0,0	1	1123	0
chr1	162933393	162936632	KnowTID_00000585	00431	-	162933393	162936632	0,0,0	2	2044,932	0,2307
chr1	163643835	163644958	KnowTID_00000321	00192	+	163643835	163644958	0,0,0	1	1123	0
chr1	163697759	163705217	NovelTID_00000370	00247	-	163697759	163705217	0,0,0	2	1234,434	0,7024
chr1	163698013	163705107	NovelTID_00000371	00247	-	163698013	163705107	0,0,0	3	417,143,324	0,837,6770
chr1	163807969	163813045	KnowTID_00000322	00193	+	163807969	163813045	0,0,0	3	202,17,1685	0,3363,3391
chr1	163820578	163831044	KnowTID_00000323	00194	+	163820578	163831044	0,0,0	4	83,77,231,185	0,1699,2286,10281
chr1	164546645	164550590	NovelTID_00000143	00097	+	164546645	164550590	0,0,0	2	1578,1297	0,2648
chr1	164797208	164799687	KnowTID_00000324	00195	+	164797208	164799687	0,0,0	1	2479	0
chr1	164801726	164803839	NovelTID_00000144	00098	+	164801726	164803839	0,0,0	3	103,101,128	0,1569,1985
chr1	165027125	165028104	NovelTID_00000145	00099	+	165027125	165028104	0,0,0	2	26,715	0,264
chr1	165039123	165041106	KnowTID_00000325	00196	+	165039123	165041106	0,0,0	1	1983	0
chr1	165932939	165942968	KnowTID_00000586	00432	-	165932939	165942968	0,0,0	3	240,132,383	0,880,9646
chr1	165971104	165975624	NovelTID_00000372	00248	-	165971104	165975624	0,0,0	2	773,2527	0,1993
chr1	166389183	166394614	KnowTID_00000326	00197	+	166389183	166394614	0,0,0	4	688,223,81,796	0,3323,3704,4635
chr1	166390315	166392729	NovelTID_00000373	00249	-	166390315	166392729	0,0,0	2	614,1015	0,1399
chr1	166390315	166393721	NovelTID_00000374	00249	-	166390315	166393721	0,0,0	2	614,972	0,2434
chr1	166394276	166403886	NovelTID_00000375	00250	-	166394276	166403886	0,0,0	3	386,87,88	0,7095,9522
chr1	166394504	166396880	NovelTID_00000376	00250	-	166394504	166396880	0,0,0	2	158,237	0,2139
chr1	166396150	166402422	NovelTID_00000377	00250	-	166396150	166402422	0,0,0	2	675,1051	0,5221
chr1	166396150	166403886	NovelTID_00000378	00250	-	166396150	166403886	0,0,0	3	675,87,88	0,5221,7648
chr1	166408698	166425438	NovelTID_00000379	00251	-	166408698	166425438	0,0,0	2	1313,1027	0,15713
chr1	166421278	166425428	NovelTID_00000380	00251	-	166421278	166425428	0,0,0	2	2216,1017	0,3133
chr1	166423009	166424554	NovelTID_00000381	00251	-	166423009	166424554	0,0,0	2	710,143	0,1402
chr1	166433437	166445013	KnowTID_00000327	00198	+	166433437	166445013	0,0,0	3	238,131,1656	0,4898,9920
chr1	166466191	166466931	NovelTID_00000382	00252	-	166466191	166466931	0,0,0	2	32,608	0,132
chr1	166505585	166507884	KnowTID_00000328	00199	+	166505585	166507884	0,0,0	1	2299	0
chr1	166507564	166508684	KnowTID_00000329	00199	+	166507564	166508684	0,0,0	1	1120	0
chr1	166560950	166562257	NovelTID_00000146	00100	+	166560950	166562257	0,0,0	2	38,386	0,921
chr1	166642684	166645059	NovelTID_00000147	00101	+	166642684	166645059	0,0,0	2	48,815	0,1560
chr1	166769723	166775695	NovelTID_00000383	00253	-	166769723	166775695	0,0,0	2	38,288	0,5684
chr1	166792594	166794385	NovelTID_00000384	00254	-	166792594	166794385	0,0,0	2	49,184	0,1607
chr1	166793251	166801569	KnowTID_00000330	00200	+	166793251	166801569	0,0,0	5	355,117,102,129,885	0,1406,3117,7017,7433
chr1	166799489	166800818	KnowTID_00000331	00200	+	166799489	166800818	0,0,0	2	101,134	0,1195
chr1	166802963	166806484	KnowTID_00000587	00433	-	166802963	166806484	0,0,0	1	3521	0
chr1	166881547	166883478	NovelTID_00000385	00255	-	166881547	166883478	0,0,0	2	496,24	0,1907
chr1	166891051	166891530	KnowTID_00000332	00201	+	166891051	166891530	0,0,0	2	118,238	0,241
chr1	166891051	166892955	KnowTID_00000333	00201	+	166891051	166892955	0,0,0	2	118,325	0,1579
chr1	166922912	166927603	NovelTID_00000386	00256	-	166922912	166927603	0,0,0	2	234,42	0,4649
chr1	166955814	166962758	NovelTID_00000387	00257	-	166955814	166962758	0,0,0	2	250,301	0,6643
chr1	166992956	167039307	NovelTID_00000148	00102	+	166992956	167039307	0,0,0	2	328,198	0,46153
chr1	166994154	166998245	KnowTID_00000588	00434	-	166994154	166998245	0,0,0	2	3133,85	0,4006
chr1	166994154	167022061	KnowTID_00000589	00434	-	166994154	167022061	0,0,0	5	3133,63,251,99,45	0,4006,4434,5362,27862
chr1	167213083	167214480	NovelTID_00000149	00103	+	167213083	167214480	0,0,0	2	450,688	0,709
chr1	167255963	167256876	KnowTID_00000334	00202	+	167255963	167256876	0,0,0	1	913	0
chr1	167259026	167259276	KnowTID_00000590	00435	-	167259026	167259276	0,0,0	3	128,39,54	0,152,196
chr1	167510409	167511184	NovelTID_00000388	00258	-	167510409	167511184	0,0,0	2	298,22	0,753
chr1	167515313	167516122	KnowTID_00000335	00203	+	167515313	167516122	0,0,0	1	809	0
chr1	167651686	167652908	KnowTID_00000336	00204	+	167651686	167652908	0,0,0	1	1222	0
chr1	167678010	167681845	NovelTID_00000389	00259	-	167678010	167681845	0,0,0	2	2329,22	0,3813
chr1	167678010	167681924	NovelTID_00000390	00259	-	167678010	167681924	0,0,0	2	2981,101	0,3813
chr1	167678010	167681924	NovelTID_00000391	00259	-	167678010	167681924	0,0,0	2	2897,101	0,3813
chr1	167933088	167968389	KnowTID_00000337	00205	+	167933088	167968389	0,0,0	2	25,818	0,34483
chr1	167978041	167981038	NovelTID_00000392	00260	-	167978041	167981038	0,0,0	2	971,1914	0,1083
chr1	168269656	168276833	NovelTID_00000150	00104	+	168269656	168276833	0,0,0	2	16,2799	0,4378
chr1	168303141	168306219	KnowTID_00000591	00436	-	168303141	168306219	0,0,0	1	3078	0
chr1	168378382	168385619	KnowTID_00000592	00437	-	168378382	168385619	0,0,0	3	904,84,285	0,5131,6952
chr1	168904153	168929861	KnowTID_00000593	00438	-	168904153	168929861	0,0,0	3	711,47,178	0,8387,25530
chr1	168928523	168930972	KnowTID_00000594	00438	-	168928523	168930972	0,0,0	2	1496,33	0,2416
chr1	169153016	169153231	KnowTID_00000338	00206	+	169153016	169153231	0,0,0	1	215	0
chr1	169155086	169155355	KnowTID_00000339	00207	+	169155086	169155355	0,0,0	1	269	0
chr1	170605402	170606013	KnowTID_00000595	00439	-	170605402	170606013	0,0,0	1	611	0
chr1	171393095	171400866	NovelTID_00000151	00105	+	171393095	171400866	0,0,0	3	221,238,113	0,3103,7658
chr1	171393095	171400866	NovelTID_00000152	00105	+	171393095	171400866	0,0,0	2	221,113	0,7658
chr1	171410463	171414206	KnowTID_00000596	00440	-	171410463	171414206	0,0,0	2	411,110	0,3633
chr1	171410463	171415603	KnowTID_00000597	00440	-	171410463	171415603	0,0,0	2	411,313	0,4827
chr1	171698313	171699173	NovelTID_00000153	00106	+	171698313	171699173	0,0,0	2	258,26	0,834
chr1	172105310	172106446	KnowTID_00000340	00208	+	172105310	172106446	0,0,0	1	1136	0
chr1	172184179	172185870	KnowTID_00000598	00441	-	172184179	172185870	0,0,0	1	1691	0
chr1	172797997	172800861	KnowTID_00000341	00209	+	172797997	172800861	0,0,0	1	2864	0
chr1	172912074	172916597	KnowTID_00000342	00210	+	172912074	172916597	0,0,0	3	118,229,816	0,1790,3707
chr1	173005638	173014105	KnowTID_00000343	00211	+	173005638	173014105	0,0,0	3	11,201,637	0,19,7830
chr1	173190863	173191265	KnowTID_00000599	00442	-	173190863	173191265	0,0,0	1	402	0
chr1	173250736	173253299	KnowTID_00000600	00443	-	173250736	173253299	0,0,0	1	2563	0
chr1	173253110	173256308	KnowTID_00000601	00443	-	173253110	173256308	0,0,0	1	3198	0
chr1	173254292	173257445	KnowTID_00000602	00443	-	173254292	173257445	0,0,0	2	542,458	0,2695
chr1	173353315	173367449	KnowTID_00000603	00444	-	173353315	173367449	0,0,0	2	877,77	0,14057
chr1	173353579	173367483	KnowTID_00000604	00444	-	173353579	173367483	0,0,0	2	613,26	0,13878
chr1	173476641	173481746	NovelTID_00000393	00261	-	173476641	173481746	0,0,0	2	489,489	0,4616
chr1	173486175	173487010	NovelTID_00000394	00262	-	173486175	173487010	0,0,0	2	527,84	0,751
chr1	173552040	173553090	NovelTID_00000154	00107	+	173552040	173553090	0,0,0	2	124,819	0,231
chr1	173606814	173612064	KnowTID_00000605	00445	-	173606814	173612064	0,0,0	2	693,372	0,4878
chr1	173610242	173612111	KnowTID_00000606	00445	-	173610242	173612111	0,0,0	1	1869	0
chr1	173759800	173765892	KnowTID_00000607	00446	-	173759800	173765892	0,0,0	2	513,115	0,5977
chr1	174305102	174306494	KnowTID_00000608	00447	-	174305102	174306494	0,0,0	1	1392	0
chr1	174318366	174321120	KnowTID_00000609	00448	-	174318366	174321120	0,0,0	1	2754	0
chr1	174318496	174320816	KnowTID_00000610	00448	-	174318496	174320816	0,0,0	2	1154,138	0,2182
chr1	174318496	174321149	KnowTID_00000611	00448	-	174318496	174321149	0,0,0	2	1154,142	0,2511
chr1	174365438	174405100	KnowTID_00000344	00212	+	174365438	174405100	0,0,0	6	85,67,54,225,124,335	0,14531,23261,24296,24725,39327
chr1	174443379	174444938	KnowTID_00000345	00213	+	174443379	174444938	0,0,0	1	1559	0
chr1	174444978	174448326	NovelTID_00000155	00108	+	174444978	174448326	0,0,0	3	388,66,92	0,1555,3256
chr1	174741213	174744969	NovelTID_00000156	00109	+	174741213	174744969	0,0,0	2	1049,1147	0,2609
chr1	174803681	174804544	KnowTID_00000346	00214	+	174803681	174804544	0,0,0	1	863	0
chr1	174920148	174920992	NovelTID_00000157	00110	+	174920148	174920992	0,0,0	2	450,188	0,656
chr1	177504439	177508546	KnowTID_00000347	00215	+	177504439	177508546	0,0,0	3	151,91,701	0,2159,3406
chr1	177885585	177887529	KnowTID_00000612	00449	-	177885585	177887529	0,0,0	1	1944	0
chr1	178206343	178209900	KnowTID_00000348	00216	+	178206343	178209900	0,0,0	1	3557	0
chr1	178300285	178303851	KnowTID_00000613	00450	-	178300285	178303851	0,0,0	1	3566	0
chr1	178360241	178457400	KnowTID_00000614	00451	-	178360241	178457400	0,0,0	4	682,56,83,134	0,23955,88055,97025
chr1	179237953	179250736	NovelTID_00000158	00111	+	179237953	179250736	0,0,0	3	1000,74,138	0,1920,12645
chr1	179237953	179273265	NovelTID_00000159	00111	+	179237953	179273265	0,0,0	3	1000,74,342	0,1920,34970
chr1	179389096	179391334	KnowTID_00000349	00217	+	179389096	179391334	0,0,0	3	186,274,797	0,1009,1441
chr1	179397508	179406398	KnowTID_00000350	00218	+	179397508	179406398	0,0,0	2	64,1169	0,7721
chr1	179449207	179452177	NovelTID_00000160	00112	+	179449207	179452177	0,0,0	2	44,1477	0,1493
chr1	179565837	179567068	KnowTID_00000615	00452	-	179565837	179567068	0,0,0	1	1231	0
chr1	179571672	179573074	KnowTID_00000616	00453	-	179571672	179573074	0,0,0	3	356,105,237	0,468,1165
chr1	180269731	180271601	KnowTID_00000351	00219	+	180269731	180271601	0,0,0	1	1870	0
chr1	180434541	180436011	NovelTID_00000161	00113	+	180434541	180436011	0,0,0	2	25,267	0,1203
chr1	180865174	180869266	KnowTID_00000352	00220	+	180865174	180869266	0,0,0	2	87,1625	0,2467
chr1	180867240	180869330	KnowTID_00000353	00220	+	180867240	180869330	0,0,0	1	2090	0
chr1	181795665	181797240	NovelTID_00000395	00263	-	181795665	181797240	0,0,0	2	628,198	0,1377
chr1	182142027	182144881	NovelTID_00000396	00264	-	182142027	182144881	0,0,0	2	585,60	0,2794
chr1	182142027	182154486	NovelTID_00000397	00264	-	182142027	182154486	0,0,0	3	585,141,114	0,11082,12345
chr1	182142027	182154486	NovelTID_00000398	00264	-	182142027	182154486	0,0,0	4	585,124,141,114	0,9821,11082,12345
chr1	182447589	182449544	KnowTID_00000617	00454	-	182447589	182449544	0,0,0	1	1955	0
chr1	182482593	182489571	NovelTID_00000399	00265	-	182482593	182489571	0,0,0	2	597,195	0,6783
chr1	182685968	182689019	KnowTID_00000354	00221	+	182685968	182689019	0,0,0	3	1104,158,490	0,1933,2561
chr1	182707972	182709037	KnowTID_00000355	00222	+	182707972	182709037	0,0,0	2	83,977	0,88
chr1	182716253	182722127	NovelTID_00000162	00114	+	182716253	182722127	0,0,0	2	90,371	0,5503
chr1	182807593	182815947	KnowTID_00000618	00455	-	182807593	182815947	0,0,0	2	1600,23	0,8331
chr1	182956408	182959860	KnowTID_00000356	00223	+	182956408	182959860	0,0,0	1	3452	0
chr1	183001450	183003033	KnowTID_00000619	00456	-	183001450	183003033	0,0,0	1	1583	0
chr1	183017272	183020178	KnowTID_00000620	00457	-	183017272	183020178	0,0,0	1	2906	0
chr1	183019213	183022733	KnowTID_00000621	00457	-	183019213	183022733	0,0,0	7	35,385,39,379,310,318,1999	0,51,453,497,882,1197,1521
chr1	183020764	183023489	KnowTID_00000357	00224	+	183020764	183023489	0,0,0	1	2725	0
chr1	183074387	183075908	KnowTID_00000358	00225	+	183074387	183075908	0,0,0	1	1521	0
chr1	183162589	183165130	NovelTID_00000163	00115	+	183162589	183165130	0,0,0	3	857,261,593	0,1417,1948
chr1	183162589	183165130	NovelTID_00000164	00115	+	183162589	183165130	0,0,0	2	857,834	0,1707
chr1	183163754	183165130	NovelTID_00000165	00115	+	183163754	183165130	0,0,0	2	513,593	0,783
chr1	183215938	183226722	NovelTID_00000166	00116	+	183215938	183226722	0,0,0	3	123,108,21	0,9966,10763
chr1	183215960	183226153	NovelTID_00000167	00116	+	183215960	183226153	0,0,0	2	101,249	0,9944
chr1	183541995	183543285	NovelTID_00000400	00266	-	183541995	183543285	0,0,0	2	1110,39	0,1251
chr1	183547071	183548010	KnowTID_00000622	00458	-	183547071	183548010	0,0,0	1	939	0
chr1	183583509	183608139	KnowTID_00000359	00226	+	183583509	183608139	0,0,0	4	63,146,135,458	0,153,23576,24172
chr1	183616560	183620373	KnowTID_00000623	00459	-	183616560	183620373	0,0,0	1	3813	0
chr1	183830003	183832015	KnowTID_00000624	00460	-	183830003	183832015	0,0,0	1	2012	0
chr1	183950354	183952697	KnowTID_00000360	00227	+	183950354	183952697	0,0,0	1	2343	0
chr1	183957414	183961340	KnowTID_00000625	00461	-	183957414	183961340	0,0,0	2	1608,167	0,3759
chr1	183957414	183963763	KnowTID_00000626	00461	-	183957414	183963763	0,0,0	2	1608,23	0,6326
chr1	184185436	184200074	NovelTID_00000168	00117	+	184185436	184200074	0,0,0	3	284,213,152	0,689,14486
chr1	184185514	184202713	NovelTID_00000169	00117	+	184185514	184202713	0,0,0	4	206,213,77,467	0,611,14408,16732
chr1	184185532	184186374	NovelTID_00000170	00117	+	184185532	184186374	0,0,0	2	188,249	0,593
chr1	184218245	184233378	KnowTID_00000361	00228	+	184218245	184233378	0,0,0	3	116,113,2175	0,9794,12958
chr1	184230964	184233420	KnowTID_00000362	00228	+	184230964	184233420	0,0,0	2	365,321	0,2135
chr1	184293412	184302950	NovelTID_00000401	00267	-	184293412	184302950	0,0,0	2	5947,559	0,8979
chr1	184293412	184302950	NovelTID_00000402	00267	-	184293412	184302950	0,0,0	2	5947,1230	0,8308
chr1	184309194	184312448	NovelTID_00000403	00268	-	184309194	184312448	0,0,0	2	404,25	0,3229
chr1	184447753	184450875	NovelTID_00000404	00269	-	184447753	184450875	0,0,0	2	360,32	0,3090
chr1	184593135	184593934	NovelTID_00000171	00118	+	184593135	184593934	0,0,0	2	23,323	0,476
chr1	184599987	184600665	NovelTID_00000405	00270	-	184599987	184600665	0,0,0	2	465,123	0,555
chr1	184610069	184612023	KnowTID_00000363	00229	+	184610069	184612023	0,0,0	1	1954	0
chr1	184837840	184840672	KnowTID_00000627	00462	-	184837840	184840672	0,0,0	1	2832	0
chr1	184865825	184869569	KnowTID_00000364	00230	+	184865825	184869569	0,0,0	2	1399,2254	0,1490
chr1	185377279	185388348	NovelTID_00000172	00119	+	185377279	185388348	0,0,0	2	177,1287	0,9782
chr1	185441494	185442186	NovelTID_00000173	00120	+	185441494	185442186	0,0,0	2	52,268	0,424
chr1	185441494	185442186	NovelTID_00000174	00120	+	185441494	185442186	0,0,0	3	52,56,122	0,424,570
chr1	185501785	185502577	NovelTID_00000406	00271	-	185501785	185502577	0,0,0	2	225,484	0,308
chr1	185520315	185523052	NovelTID_00000175	00121	+	185520315	185523052	0,0,0	2	43,725	0,2012
chr1	185572855	185633625	KnowTID_00000365	00231	+	185572855	185633625	0,0,0	3	160,138,334	0,33160,60436
chr1	185764375	185790022	NovelTID_00000407	00272	-	185764375	185790022	0,0,0	2	1779,104	0,25543
chr1	185764375	185818319	NovelTID_00000408	00272	-	185764375	185818319	0,0,0	3	1779,71,522	0,25543,53422
chr1	185765841	185807119	NovelTID_00000409	00272	-	185765841	185807119	0,0,0	2	313,96	0,41182
chr1	185825833	185828737	NovelTID_00000410	00273	-	185825833	185828737	0,0,0	2	302,42	0,2862
chr1	185830241	185831748	NovelTID_00000411	00274	-	185830241	185831748	0,0,0	2	665,561	0,946
chr1	185834545	185836171	KnowTID_00000366	00232	+	185834545	185836171	0,0,0	3	1443,49,118	0,1451,1508
chr1	185993695	185996151	NovelTID_00000176	00122	+	185993695	185996151	0,0,0	2	31,614	0,1842
chr1	186198116	186206458	NovelTID_00000412	00275	-	186198116	186206458	0,0,0	2	2686,205	0,8137
chr1	186266858	186267611	KnowTID_00000367	00233	+	186266858	186267611	0,0,0	1	753	0
chr1	186351719	186381570	KnowTID_00000628	00463	-	186351719	186381570	0,0,0	6	230,232,81,111,45,79	0,996,2244,3863,26528,29772
chr1	186558044	186563517	NovelTID_00000177	00123	+	186558044	186563517	0,0,0	3	34,168,399	0,2697,5074
chr1	186603931	186606159	NovelTID_00000413	00276	-	186603931	186606159	0,0,0	2	267,48	0,2180
chr1	186635559	186636561	NovelTID_00000178	00124	+	186635559	186636561	0,0,0	2	394,58	0,944
chr1	186855165	186856764	NovelTID_00000179	00125	+	186855165	186856764	0,0,0	2	487,23	0,1576
chr1	186880515	186883676	NovelTID_00000180	00126	+	186880515	186883676	0,0,0	2	24,3069	0,92
chr1	186909980	186915198	KnowTID_00000368	00234	+	186909980	186915198	0,0,0	2	112,1274	0,3944
chr1	187153329	187155737	KnowTID_00000369	00235	+	187153329	187155737	0,0,0	1	2408	0
chr1	187183339	187186744	KnowTID_00000629	00464	-	187183339	187186744	0,0,0	2	409,290	0,3115
chr1	187185287	187186744	KnowTID_00000630	00464	-	187185287	187186744	0,0,0	1	1457	0
chr1	187311172	187322038	KnowTID_00000370	00236	+	187311172	187322038	0,0,0	2	117,948	0,9918
chr1	187435383	187468937	NovelTID_00000181	00127	+	187435383	187468937	0,0,0	3	70,133,1349	0,7094,32205
chr1	188006135	188006623	KnowTID_00000631	00465	-	188006135	188006623	0,0,0	1	488	0
chr1	188171193	188172304	KnowTID_00000371	00237	+	188171193	188172304	0,0,0	1	1111	0
chr1	188335716	188382351	KnowTID_00000632	00466	-	188335716	188382351	0,0,0	2	1056,105	0,46530
chr1	188335760	188382560	KnowTID_00000633	00466	-	188335760	188382560	0,0,0	3	1203,187,314	0,7259,46486
chr1	188411203	188425763	NovelTID_00000182	00128	+	188411203	188425763	0,0,0	4	222,590,154,2432	0,1673,2480,12128
chr1	188411203	188425763	NovelTID_00000183	00128	+	188411203	188425763	0,0,0	4	96,590,154,2432	0,1673,2480,12128
chr1	188411203	188425763	NovelTID_00000184	00128	+	188411203	188425763	0,0,0	3	222,154,2432	0,2480,12128
chr1	188411203	188429232	NovelTID_00000185	00128	+	188411203	188429232	0,0,0	5	96,590,154,201,372	0,1673,2480,16153,17657
chr1	188411203	188429232	NovelTID_00000186	00128	+	188411203	188429232	0,0,0	5	222,590,154,201,372	0,1673,2480,16153,17657
chr1	188411203	188429232	NovelTID_00000187	00128	+	188411203	188429232	0,0,0	4	222,154,201,372	0,2480,16153,17657
chr1	188411203	188438793	NovelTID_00000188	00128	+	188411203	188438793	0,0,0	4	96,590,154,1842	0,1673,2480,25748
chr1	188411203	188438793	NovelTID_00000189	00128	+	188411203	188438793	0,0,0	4	96,590,154,1342	0,1673,2480,26248
chr1	188411203	188438793	NovelTID_00000190	00128	+	188411203	188438793	0,0,0	4	222,590,154,1842	0,1673,2480,25748
chr1	188411203	188438793	NovelTID_00000191	00128	+	188411203	188438793	0,0,0	3	222,154,1842	0,2480,25748
chr1	188411203	188438793	NovelTID_00000192	00128	+	188411203	188438793	0,0,0	3	222,154,1342	0,2480,26248
chr1	188411205	188439324	NovelTID_00000193	00128	+	188411205	188439324	0,0,0	4	220,590,154,1873	0,1671,2478,26246
chr1	188411409	188413493	NovelTID_00000194	00128	+	188411409	188413493	0,0,0	2	16,617	0,1467
chr1	188413664	188423794	NovelTID_00000195	00128	+	188413664	188423794	0,0,0	2	173,463	0,9667
chr1	188413664	188437831	NovelTID_00000196	00128	+	188413664	188437831	0,0,0	2	173,380	0,23787
chr1	188535096	188536977	KnowTID_00000634	00467	-	188535096	188536977	0,0,0	1	1881	0
chr1	188573274	188576800	KnowTID_00000372	00238	+	188573274	188576800	0,0,0	2	770,505	0,3021
chr1	188750811	188753991	KnowTID_00000373	00239	+	188750811	188753991	0,0,0	2	343,1117	0,2063
chr1	189219165	189219370	KnowTID_00000635	00468	-	189219165	189219370	0,0,0	1	205	0
chr1	189271755	189286543	KnowTID_00000374	00240	+	189271755	189286543	0,0,0	4	220,247,2251,73	0,393,11530,14715
chr1	189310084	189315003	NovelTID_00000414	00277	-	189310084	189315003	0,0,0	2	480,36	0,4883
chr1	189411354	189414845	NovelTID_00000415	00278	-	189411354	189414845	0,0,0	2	199,29	0,3462
chr1	190888773	190890312	KnowTID_00000375	00241	+	190888773	190890312	0,0,0	1	1539	0
chr1	190912396	190913399	KnowTID_00000636	00469	-	190912396	190913399	0,0,0	1	1003	0
chr1	191863216	191869066	NovelTID_00000416	00279	-	191863216	191869066	0,0,0	2	396,254	0,5596
chr1	191872666	191912745	NovelTID_00000197	00129	+	191872666	191912745	0,0,0	4	95,100,85,1191	0,5802,18012,38888
chr1	191881917	191882572	NovelTID_00000417	00280	-	191881917	191882572	0,0,0	2	311,141	0,514
chr1	191881917	191886247	NovelTID_00000418	00280	-	191881917	191886247	0,0,0	2	479,3675	0,655
chr1	191881917	191886247	NovelTID_00000419	00280	-	191881917	191886247	0,0,0	2	606,3589	0,741
chr1	191882028	191883530	NovelTID_00000420	00280	-	191882028	191883530	0,0,0	3	495,39,745	0,630,757
chr1	191882337	191883603	NovelTID_00000421	00280	-	191882337	191883603	0,0,0	3	59,43,818	0,235,448
chr1	191882411	191883603	NovelTID_00000422	00280	-	191882411	191883603	0,0,0	2	63,818	0,374
chr1	191882584	191884200	NovelTID_00000423	00280	-	191882584	191884200	0,0,0	2	150,1415	0,201
chr1	191883193	191912777	NovelTID_00000198	00129	+	191883193	191912777	0,0,0	3	81,85,1223	0,7485,28361
chr1	191883193	191915182	NovelTID_00000199	00129	+	191883193	191915182	0,0,0	4	81,85,492,1798	0,7485,28361,30191
chr1	191893971	191894278	NovelTID_00000424	00281	-	191893971	191894278	0,0,0	2	166,51	0,256
chr1	191897453	191912353	NovelTID_00000200	00129	+	191897453	191912353	0,0,0	2	162,799	0,14101
chr1	192042567	192048018	NovelTID_00000201	00130	+	192042567	192048018	0,0,0	2	280,4614	0,837
chr1	192042567	192048018	NovelTID_00000202	00130	+	192042567	192048018	0,0,0	2	296,4614	0,837
chr1	192198529	192215928	NovelTID_00000425	00282	-	192198529	192215928	0,0,0	2	683,40	0,17359
chr1	192227526	192241024	KnowTID_00000376	00242	+	192227526	192241024	0,0,0	3	93,138,900	0,12378,12598
chr1	192243211	192268724	KnowTID_00000637	00470	-	192243211	192268724	0,0,0	3	1006,66,337	0,23226,25176
chr1	192515135	192519146	NovelTID_00000203	00131	+	192515135	192519146	0,0,0	3	372,90,339	0,1825,3672
chr1	192515135	192521557	NovelTID_00000204	00131	+	192515135	192521557	0,0,0	3	372,90,445	0,1825,5977
chr1	192961922	192962968	NovelTID_00000426	00283	-	192961922	192962968	0,0,0	2	28,878	0,168
chr1	193073302	193075145	KnowTID_00000377	00243	+	193073302	193075145	0,0,0	1	1843	0
chr1	193091056	193112593	KnowTID_00000378	00244	+	193091056	193112593	0,0,0	6	50,405,73,237,107,580	0,14529,15049,17728,20752,20957
chr1	193123383	193125138	NovelTID_00000205	00132	+	193123383	193125138	0,0,0	2	326,1276	0,479
chr1	193222538	193227151	KnowTID_00000638	00471	-	193222538	193227151	0,0,0	2	1809,612	0,4001
chr1	193230429	193231040	NovelTID_00000206	00133	+	193230429	193231040	0,0,0	2	269,230	0,381
chr1	193234733	193236912	KnowTID_00000379	00245	+	193234733	193236912	0,0,0	1	2179	0
chr1	193244225	193245275	NovelTID_00000427	00284	-	193244225	193245275	0,0,0	2	498,40	0,1010
chr1	193244225	193246862	NovelTID_00000428	00284	-	193244225	193246862	0,0,0	2	498,65	0,2572
chr1	193244550	193245802	NovelTID_00000207	00134	+	193244550	193245802	0,0,0	2	447,550	0,702
chr1	193253395	193256582	NovelTID_00000429	00285	-	193253395	193256582	0,0,0	3	1158,91,409	0,2541,2778
chr1	193260218	193288927	KnowTID_00000639	00472	-	193260218	193288927	0,0,0	6	1641,157,262,21,79,225	0,5311,6172,9226,27963,28484
chr1	193297897	193300405	NovelTID_00000208	00135	+	193297897	193300405	0,0,0	2	25,1017	0,1491
chr1	193311111	193314194	NovelTID_00000209	00136	+	193311111	193314194	0,0,0	2	256,141	0,2942
chr1	193314220	193315396	NovelTID_00000210	00137	+	193314220	193315396	0,0,0	2	15,639	0,537
chr1	193315061	193319118	NovelTID_00000430	00286	-	193315061	193319118	0,0,0	3	36,364,32	0,2989,4025
chr1	193325685	193326628	KnowTID_00000380	00246	+	193325685	193326628	0,0,0	1	943	0
chr1	193641274	193643421	KnowTID_00000381	00247	+	193641274	193643421	0,0,0	2	360,830	0,1317
chr1	193644548	193645228	KnowTID_00000640	00473	-	193644548	193645228	0,0,0	1	680	0
chr1	194717429	194720945	KnowTID_00000641	00474	-	194717429	194720945	0,0,0	1	3516	0
chr1	195302818	195305444	NovelTID_00000211	00138	+	195302818	195305444	0,0,0	2	754,141	0,2485
chr1	195319796	195322080	KnowTID_00000382	00248	+	195319796	195322080	0,0,0	1	2284	0
chr1	195469965	195481962	NovelTID_00000431	00287	-	195469965	195481962	0,0,0	3	1127,76,255	0,7128,11742
chr1	195514265	195614604	NovelTID_00000212	00139	+	195514265	195614604	0,0,0	4	41,55,60,3901	0,61182,83907,96438
chr1	195514265	195614604	NovelTID_00000213	00139	+	195514265	195614604	0,0,0	2	41,3901	0,96438
chr1	195771034	195773981	KnowTID_00000642	00475	-	195771034	195773981	0,0,0	1	2947	0
chr1	196038380	196048953	KnowTID_00000643	00476	-	196038380	196048953	0,0,0	3	150,97,331	0,2824,10242
chr1	196041418	196042773	KnowTID_00000644	00477	-	196041418	196042773	0,0,0	1	1355	0
chr1	196126557	196138877	NovelTID_00000432	00288	-	196126557	196138877	0,0,0	2	289,2354	0,9966
chr1	196126557	196143606	NovelTID_00000433	00288	-	196126557	196143606	0,0,0	3	289,192,4729	0,9966,12320
chr1	196126557	196167676	NovelTID_00000434	00288	-	196126557	196167676	0,0,0	6	289,192,255,117,104,412	0,9966,12320,18677,22460,40707
chr1	196126557	196167676	NovelTID_00000435	00288	-	196126557	196167676	0,0,0	4	289,117,104,412	0,18677,22460,40707
chr1	196126574	196149138	NovelTID_00000436	00288	-	196126574	196149138	0,0,0	5	272,192,56,117,121	0,9949,12502,18660,22443
chr1	196126574	196164769	NovelTID_00000437	00288	-	196126574	196164769	0,0,0	6	272,192,56,117,104,168	0,9949,12502,18660,22443,38027
chr1	196126782	196149192	NovelTID_00000438	00288	-	196126782	196149192	0,0,0	3	64,117,175	0,18452,22235
chr1	196133248	196143606	NovelTID_00000439	00288	-	196133248	196143606	0,0,0	2	3467,4729	0,5629
chr1	196133248	196167676	NovelTID_00000440	00288	-	196133248	196167676	0,0,0	5	3467,255,117,104,412	0,5629,11986,15769,34016
chr1	196136715	196167676	NovelTID_00000441	00288	-	196136715	196167676	0,0,0	4	2417,117,104,412	0,8519,12302,30549
chr1	196144690	196150653	NovelTID_00000442	00288	-	196144690	196150653	0,0,0	2	661,1636	0,4327
chr1	196184106	196190455	NovelTID_00000443	00289	-	196184106	196190455	0,0,0	2	37,189	0,6160
chr1	196819453	196822389	KnowTID_00000383	00249	+	196819453	196822389	0,0,0	1	2936	0
chr1	196839940	196842646	KnowTID_00000384	00250	+	196839940	196842646	0,0,0	1	2706	0
chr1	196844091	196844441	KnowTID_00000645	00478	-	196844091	196844441	0,0,0	2	205,50	0,300
chr1	196960755	196961531	NovelTID_00000214	00140	+	196960755	196961531	0,0,0	2	27,408	0,368
chr1	197046244	197048960	KnowTID_00000646	00479	-	197046244	197048960	0,0,0	1	2716	0
chr10	3128184	3134202	NovelTID_00000858	00407	-	3128184	3134202	0,0,0	2	3529,105	0,5913
chr10	3685155	3692063	NovelTID_00000859	00408	-	3685155	3692063	0,0,0	2	241,126	0,6782
chr10	5950117	5952634	KnowTID_00000860	00668	-	5950117	5952634	0,0,0	1	2517	0
chr10	5952416	5954789	KnowTID_00000861	00668	-	5952416	5954789	0,0,0	1	2373	0
chr10	6092765	6100749	KnowTID_00000647	00480	+	6092765	6100749	0,0,0	2	47,309	0,7675
chr10	6133420	6140115	KnowTID_00000648	00481	+	6133420	6140115	0,0,0	4	65,350,440,1802	0,177,3579,4893
chr10	6617518	6619411	KnowTID_00000862	00669	-	6617518	6619411	0,0,0	1	1893	0
chr10	6627134	6628376	KnowTID_00000863	00670	-	6627134	6628376	0,0,0	1	1242	0
chr10	6806794	6836301	NovelTID_00000860	00409	-	6806794	6836301	0,0,0	3	283,113,101	0,13575,29406
chr10	6829177	6831622	NovelTID_00000861	00410	-	6829177	6831622	0,0,0	2	1367,52	0,2393
chr10	7544964	7547304	KnowTID_00000649	00482	+	7544964	7547304	0,0,0	1	2340	0
chr10	7696165	7702693	NovelTID_00000444	00290	+	7696165	7702693	0,0,0	3	166,2179,175	0,1599,6353
chr10	7696983	7703156	NovelTID_00000445	00290	+	7696983	7703156	0,0,0	4	2960,180,209,20	0,3356,5535,6153
chr10	7699844	7703166	NovelTID_00000446	00290	+	7699844	7703166	0,0,0	3	99,209,30	0,2674,3292
chr10	7803903	7806374	NovelTID_00000862	00411	-	7803903	7806374	0,0,0	2	1434,428	0,2043
chr10	7895935	7913447	NovelTID_00000447	00291	+	7895935	7913447	0,0,0	3	198,137,502	0,15183,17010
chr10	7912531	7914962	NovelTID_00000863	00412	-	7912531	7914962	0,0,0	2	906,1023	0,1408
chr10	8662761	8665101	KnowTID_00000864	00671	-	8662761	8665101	0,0,0	1	2340	0
chr10	8778617	8781324	KnowTID_00000865	00672	-	8778617	8781324	0,0,0	1	2707	0
chr10	8789216	8791273	KnowTID_00000866	00673	-	8789216	8791273	0,0,0	1	2057	0
chr10	8799666	8800564	KnowTID_00000867	00674	-	8799666	8800564	0,0,0	1	898	0
chr10	8889584	8892601	KnowTID_00000868	00675	-	8889584	8892601	0,0,0	1	3017	0
chr10	8914428	8915617	KnowTID_00000869	00676	-	8914428	8915617	0,0,0	1	1189	0
chr10	8943771	8944549	KnowTID_00000870	00677	-	8943771	8944549	0,0,0	1	778	0
chr10	9017809	9020414	KnowTID_00000871	00678	-	9017809	9020414	0,0,0	1	2605	0
chr10	9018743	9020386	KnowTID_00000650	00483	+	9018743	9020386	0,0,0	1	1643	0
chr10	9080976	9083107	KnowTID_00000872	00679	-	9080976	9083107	0,0,0	1	2131	0
chr10	9147396	9151624	KnowTID_00000873	00680	-	9147396	9151624	0,0,0	1	4228	0
chr10	9167876	9171236	KnowTID_00000874	00681	-	9167876	9171236	0,0,0	1	3360	0
chr10	9202726	9207000	KnowTID_00000875	00682	-	9202726	9207000	0,0,0	1	4274	0
chr10	9266043	9267319	KnowTID_00000876	00683	-	9266043	9267319	0,0,0	1	1276	0
chr10	9342744	9344647	KnowTID_00000877	00684	-	9342744	9344647	0,0,0	1	1903	0
chr10	9404519	9411707	KnowTID_00000651	00484	+	9404519	9411707	0,0,0	4	361,27,95,2497	0,1855,4074,4691
chr10	9418497	9419083	NovelTID_00000864	00413	-	9418497	9419083	0,0,0	2	70,184	0,402
chr10	9620955	9642736	NovelTID_00000448	00292	+	9620955	9642736	0,0,0	2	340,739	0,21042
chr10	9737176	9741204	KnowTID_00000652	00485	+	9737176	9741204	0,0,0	1	4028	0
chr10	9871156	9890273	NovelTID_00000449	00293	+	9871156	9890273	0,0,0	3	142,225,3323	0,7581,15794
chr10	9954788	9957125	KnowTID_00000653	00486	+	9954788	9957125	0,0,0	1	2337	0
chr10	9954791	9978497	KnowTID_00000654	00486	+	9954791	9978497	0,0,0	4	513,66,160,134	0,19159,22492,23572
chr10	9985400	9989699	NovelTID_00000865	00414	-	9985400	9989699	0,0,0	2	333,53	0,4246
chr10	9985400	9991222	NovelTID_00000866	00414	-	9985400	9991222	0,0,0	2	333,133	0,5689
chr10	10964587	11000797	KnowTID_00000878	00685	-	10964587	11000797	0,0,0	2	1255,358	0,35852
chr10	10975346	11001019	KnowTID_00000879	00685	-	10975346	11001019	0,0,0	6	1292,252,60,145,50,286	0,14488,16484,17833,24747,25387
chr10	11021896	11023877	KnowTID_00000655	00487	+	11021896	11023877	0,0,0	1	1981	0
chr10	11487632	11488418	KnowTID_00000656	00488	+	11487632	11488418	0,0,0	1	786	0
chr10	11808199	11848109	NovelTID_00000450	00294	+	11808199	11848109	0,0,0	2	51,367	0,39543
chr10	12636443	12642925	KnowTID_00000880	00686	-	12636443	12642925	0,0,0	3	426,109,554	0,4963,5928
chr10	12636443	12642925	KnowTID_00000881	00686	-	12636443	12642925	0,0,0	4	426,109,93,554	0,4963,5720,5928
chr10	13216027	13216553	NovelTID_00000867	00415	-	13216027	13216553	0,0,0	2	349,94	0,432
chr10	13591085	13599014	KnowTID_00000657	00489	+	13591085	13599014	0,0,0	3	25,232,376	0,6838,7553
chr10	13647003	13648770	KnowTID_00000882	00687	-	13647003	13648770	0,0,0	1	1767	0
chr10	13685579	13685781	KnowTID_00000658	00490	+	13685579	13685781	0,0,0	1	202	0
chr10	13929850	13935757	NovelTID_00000868	00416	-	13929850	13935757	0,0,0	3	490,1780,465	0,3559,5442
chr10	13929850	13935757	NovelTID_00000869	00416	-	13929850	13935757	0,0,0	3	785,1780,465	0,3559,5442
chr10	13929850	13935757	NovelTID_00000870	00416	-	13929850	13935757	0,0,0	3	785,1927,465	0,3412,5442
chr10	14033713	14034539	KnowTID_00000883	00688	-	14033713	14034539	0,0,0	1	826	0
chr10	14042287	14044213	NovelTID_00000451	00295	+	14042287	14044213	0,0,0	2	85,900	0,1026
chr10	14265143	14271199	NovelTID_00000452	00296	+	14265143	14271199	0,0,0	2	17,500	0,5556
chr10	14900908	15197661	KnowTID_00000659	00491	+	14900908	15197661	0,0,0	4	307,11,11,16	0,75474,174351,296737
chr10	15020155	15021518	KnowTID_00000660	00492	+	15020155	15021518	0,0,0	1	1363	0
chr10	15020197	15032182	KnowTID_00000661	00492	+	15020197	15032182	0,0,0	2	174,1669	0,10316
chr10	15455049	15479859	NovelTID_00000871	00417	-	15455049	15479859	0,0,0	4	120,186,152,108	0,12120,15627,24702
chr10	15455049	15479859	NovelTID_00000872	00417	-	15455049	15479859	0,0,0	4	120,186,214,108	0,12120,15627,24702
chr10	15467212	15470883	NovelTID_00000873	00417	-	15467212	15470883	0,0,0	2	139,207	0,3464
chr10	15493284	15494390	NovelTID_00000453	00297	+	15493284	15494390	0,0,0	2	34,206	0,900
chr10	15511470	15526823	KnowTID_00000662	00493	+	15511470	15526823	0,0,0	3	368,177,147	0,9751,15206
chr10	15511470	15526823	KnowTID_00000663	00493	+	15511470	15526823	0,0,0	3	379,177,147	0,9751,15206
chr10	15526116	15526823	KnowTID_00000664	00493	+	15526116	15526823	0,0,0	2	126,147	0,560
chr10	16670899	16815588	KnowTID_00000884	00689	-	16670899	16815588	0,0,0	9	2161,94,147,103,127,147,120,162,340	0,3846,4805,8354,12058,30665,38526,39202,144349
chr10	16670900	16675819	KnowTID_00000885	00689	-	16670900	16675819	0,0,0	4	1450,702,94,115	0,1458,3845,4804
chr10	17248888	17273725	NovelTID_00000454	00298	+	17248888	17273725	0,0,0	2	82,1001	0,23836
chr10	17394637	17396523	NovelTID_00000455	00299	+	17394637	17396523	0,0,0	2	327,35	0,1851
chr10	17510327	17515134	KnowTID_00000886	00690	-	17510327	17515134	0,0,0	2	571,2375	0,2432
chr10	17744048	17745453	NovelTID_00000874	00418	-	17744048	17745453	0,0,0	2	404,658	0,747
chr10	17954858	17957866	KnowTID_00000665	00494	+	17954858	17957866	0,0,0	2	52,2534	0,474
chr10	18016774	18018997	NovelTID_00000456	00300	+	18016774	18018997	0,0,0	2	2119,24	0,2199
chr10	18301651	18304913	KnowTID_00000887	00691	-	18301651	18304913	0,0,0	1	3262	0
chr10	18595359	18606851	NovelTID_00000875	00419	-	18595359	18606851	0,0,0	3	4839,216,135	0,8413,11357
chr10	18596683	18606851	NovelTID_00000876	00419	-	18596683	18606851	0,0,0	2	3515,135	0,10033
chr10	18637103	18638195	NovelTID_00000457	00301	+	18637103	18638195	0,0,0	2	281,709	0,383
chr10	18637103	18647205	NovelTID_00000458	00301	+	18637103	18647205	0,0,0	2	281,547	0,9555
chr10	18637103	18652354	NovelTID_00000459	00301	+	18637103	18652354	0,0,0	2	277,267	0,14984
chr10	18637103	18652354	NovelTID_00000460	00301	+	18637103	18652354	0,0,0	2	281,267	0,14984
chr10	18637103	18659353	NovelTID_00000461	00301	+	18637103	18659353	0,0,0	3	277,197,150	0,14984,22100
chr10	18637103	18659353	NovelTID_00000462	00301	+	18637103	18659353	0,0,0	3	281,197,150	0,14984,22100
chr10	18637103	18670629	NovelTID_00000463	00301	+	18637103	18670629	0,0,0	3	277,197,1397	0,14984,32129
chr10	18637103	18671533	NovelTID_00000464	00301	+	18637103	18671533	0,0,0	3	281,197,2301	0,14984,32129
chr10	18650863	18652354	NovelTID_00000465	00301	+	18650863	18652354	0,0,0	2	755,267	0,1224
chr10	18650863	18659353	NovelTID_00000466	00301	+	18650863	18659353	0,0,0	3	755,197,150	0,1224,8340
chr10	18650863	18670629	NovelTID_00000467	00301	+	18650863	18670629	0,0,0	3	755,197,1397	0,1224,18369
chr10	18650887	18671533	NovelTID_00000468	00301	+	18650887	18671533	0,0,0	2	1397,2301	0,18345
chr10	18781418	18783349	NovelTID_00000469	00302	+	18781418	18783349	0,0,0	2	1211,644	0,1287
chr10	18806335	18806984	KnowTID_00000888	00692	-	18806335	18806984	0,0,0	2	247,58	0,591
chr10	18813855	18821401	KnowTID_00000889	00693	-	18813855	18821401	0,0,0	4	818,143,577,1014	0,4600,5209,6532
chr10	18861554	18927753	KnowTID_00000666	00495	+	18861554	18927753	0,0,0	4	68,114,212,5814	0,25501,49291,60385
chr10	18887043	18927753	KnowTID_00000667	00495	+	18887043	18927753	0,0,0	2	126,5814	0,34896
chr10	18955014	18962502	NovelTID_00000877	00420	-	18955014	18962502	0,0,0	3	261,107,32	0,7064,7456
chr10	18997681	19000089	KnowTID_00000668	00496	+	18997681	19000089	0,0,0	1	2408	0
chr10	19010794	19045623	KnowTID_00000669	00497	+	19010794	19045623	0,0,0	5	111,78,148,159,624	0,2769,6464,22444,34205
chr10	19057197	19063754	NovelTID_00000470	00303	+	19057197	19063754	0,0,0	2	46,364	0,6193
chr10	19206520	19227117	KnowTID_00000670	00498	+	19206520	19227117	0,0,0	4	209,63,217,521	0,4240,19325,20076
chr10	19217606	19220378	KnowTID_00000890	00694	-	19217606	19220378	0,0,0	1	2772	0
chr10	19239107	19242456	KnowTID_00000891	00695	-	19239107	19242456	0,0,0	1	3349	0
chr10	20887091	20889184	NovelTID_00000471	00304	+	20887091	20889184	0,0,0	2	1603,374	0,1719
chr10	20891840	20906600	NovelTID_00000878	00421	-	20891840	20906600	0,0,0	4	5071,96,271,930	0,5579,5842,13830
chr10	20906749	20908423	KnowTID_00000671	00499	+	20906749	20908423	0,0,0	2	197,400	0,1274
chr10	20946693	20972061	NovelTID_00000879	00422	-	20946693	20972061	0,0,0	3	2151,126,468	0,19062,24900
chr10	21176687	21178437	KnowTID_00000672	00500	+	21176687	21178437	0,0,0	1	1750	0
chr10	21550304	21564657	KnowTID_00000892	00696	-	21550304	21564657	0,0,0	5	935,512,60,47,264	0,4099,5884,13927,14089
chr10	21776089	21778436	KnowTID_00000893	00697	-	21776089	21778436	0,0,0	1	2347	0
chr10	21851935	21853296	KnowTID_00000894	00698	-	21851935	21853296	0,0,0	1	1361	0
chr10	22096644	22098486	NovelTID_00000880	00423	-	22096644	22098486	0,0,0	3	145,207,55	0,257,1787
chr10	22096644	22175234	NovelTID_00000881	00423	-	22096644	22175234	0,0,0	6	145,207,117,62,117,51	0,257,12785,20277,33027,78539
chr10	22096644	22175234	NovelTID_00000882	00423	-	22096644	22175234	0,0,0	5	145,207,117,62,51	0,257,12785,20277,78539
chr10	22096644	22175234	NovelTID_00000883	00423	-	22096644	22175234	0,0,0	7	145,207,147,62,267,117,51	0,257,12785,20277,23354,33027,78539
chr10	22096644	22175234	NovelTID_00000884	00423	-	22096644	22175234	0,0,0	6	145,207,147,62,117,51	0,257,12785,20277,33027,78539
chr10	22096644	22175234	NovelTID_00000885	00423	-	22096644	22175234	0,0,0	5	145,207,147,62,51	0,257,12785,20277,78539
chr10	22096644	22175234	NovelTID_00000886	00423	-	22096644	22175234	0,0,0	4	145,207,147,51	0,257,12785,78539
chr10	22096644	22175234	NovelTID_00000887	00423	-	22096644	22175234	0,0,0	6	145,207,62,267,117,51	0,257,20277,23354,33027,78539
chr10	22096644	22175234	NovelTID_00000888	00423	-	22096644	22175234	0,0,0	5	145,207,62,117,51	0,257,20277,33027,78539
chr10	22096644	22175234	NovelTID_00000889	00423	-	22096644	22175234	0,0,0	4	145,207,62,51	0,257,20277,78539
chr10	22122618	22127276	KnowTID_00000673	00501	+	22122618	22127276	0,0,0	2	336,4212	0,446
chr10	22123650	22123948	KnowTID_00000895	00699	-	22123650	22123948	0,0,0	2	131,155	0,143
chr10	22126541	22128291	KnowTID_00000896	00700	-	22126541	22128291	0,0,0	2	992,752	0,998
chr10	22290465	22333263	NovelTID_00000890	00424	-	22290465	22333263	0,0,0	4	701,107,192,49	0,4912,22127,42749
chr10	22290465	22333263	NovelTID_00000891	00424	-	22290465	22333263	0,0,0	3	701,107,49	0,4912,42749
chr10	22326981	22327608	NovelTID_00000472	00305	+	22326981	22327608	0,0,0	2	487,56	0,571
chr10	22471702	22473138	KnowTID_00000674	00502	+	22471702	22473138	0,0,0	2	109,1157	0,279
chr10	22794032	22796653	NovelTID_00000892	00425	-	22794032	22796653	0,0,0	2	53,372	0,2249
chr10	23331068	23341954	KnowTID_00000897	00701	-	23331068	23341954	0,0,0	2	368,28	0,10858
chr10	23426612	23431274	NovelTID_00000893	00426	-	23426612	23431274	0,0,0	2	249,66	0,4596
chr10	23446149	23467178	KnowTID_00000675	00503	+	23446149	23467178	0,0,0	2	178,24	0,21005
chr10	23498417	23499640	KnowTID_00000898	00702	-	23498417	23499640	0,0,0	1	1223	0
chr10	23501062	23502409	KnowTID_00000899	00703	-	23501062	23502409	0,0,0	1	1347	0
chr10	23922706	23925554	KnowTID_00000676	00504	+	23922706	23925554	0,0,0	1	2848	0
chr10	24079337	24081611	KnowTID_00000900	00704	-	24079337	24081611	0,0,0	1	2274	0
chr10	24157367	24160960	KnowTID_00000677	00505	+	24157367	24160960	0,0,0	1	3593	0
chr10	24269120	24269797	KnowTID_00000901	00705	-	24269120	24269797	0,0,0	2	273,267	0,410
chr10	24269120	24273500	KnowTID_00000902	00705	-	24269120	24273500	0,0,0	3	273,137,52	0,1190,4328
chr10	24269246	24270146	KnowTID_00000903	00705	-	24269246	24270146	0,0,0	2	147,650	0,250
chr10	24294132	24297428	KnowTID_00000904	00706	-	24294132	24297428	0,0,0	1	3296	0
chr10	24561198	24562661	NovelTID_00000894	00427	-	24561198	24562661	0,0,0	2	1117,157	0,1306
chr10	24647377	24650489	NovelTID_00000473	00306	+	24647377	24650489	0,0,0	2	202,1192	0,1920
chr10	24650529	24677534	NovelTID_00000895	00428	-	24650529	24677534	0,0,0	4	35,115,80,81	0,1519,1729,26924
chr10	24682144	24683290	NovelTID_00000896	00429	-	24682144	24683290	0,0,0	2	786,245	0,901
chr10	24719841	24751839	NovelTID_00000474	00307	+	24719841	24751839	0,0,0	2	23,1637	0,30361
chr10	24748085	24782897	NovelTID_00000897	00430	-	24748085	24782897	0,0,0	3	3370,122,210	0,24704,34602
chr10	24748085	24817976	NovelTID_00000898	00430	-	24748085	24817976	0,0,0	2	3370,523	0,69368
chr10	24748085	24817976	NovelTID_00000899	00430	-	24748085	24817976	0,0,0	3	3370,122,523	0,24704,69368
chr10	24769775	24782897	NovelTID_00000900	00430	-	24769775	24782897	0,0,0	3	296,122,210	0,3014,12912
chr10	24769775	24817976	NovelTID_00000901	00430	-	24769775	24817976	0,0,0	3	296,122,523	0,3014,47678
chr10	24783188	24817976	NovelTID_00000902	00430	-	24783188	24817976	0,0,0	2	23,523	0,34265
chr10	24812808	24817976	NovelTID_00000903	00430	-	24812808	24817976	0,0,0	2	186,523	0,4645
chr10	24815917	24817976	NovelTID_00000904	00430	-	24815917	24817976	0,0,0	2	875,523	0,1536
chr10	24815917	24817976	NovelTID_00000905	00430	-	24815917	24817976	0,0,0	2	1197,523	0,1536
chr10	24854806	24856054	KnowTID_00000678	00506	+	24854806	24856054	0,0,0	1	1248	0
chr10	25256191	25393149	KnowTID_00000679	00507	+	25256191	25393149	0,0,0	4	284,128,116,1381	0,887,34607,135577
chr10	25335437	25341369	KnowTID_00000905	00707	-	25335437	25341369	0,0,0	4	1264,127,240,31	0,4053,5029,5901
chr10	25404331	25405316	NovelTID_00000475	00308	+	25404331	25405316	0,0,0	2	361,503	0,482
chr10	25404331	25423233	NovelTID_00000476	00308	+	25404331	25423233	0,0,0	5	361,101,164,207,413	0,482,3467,5110,18489
chr10	25404331	25423233	NovelTID_00000477	00308	+	25404331	25423233	0,0,0	4	361,101,164,413	0,482,3467,18489
chr10	25417798	25419284	KnowTID_00000906	00708	-	25417798	25419284	0,0,0	1	1486	0
chr10	25499119	25557243	KnowTID_00000907	00709	-	25499119	25557243	0,0,0	5	393,204,152,85,31	0,6120,9387,29669,58093
chr10	26430034	26431436	KnowTID_00000680	00508	+	26430034	26431436	0,0,0	1	1402	0
chr10	26466512	26468087	KnowTID_00000681	00509	+	26466512	26468087	0,0,0	1	1575	0
chr10	26647048	26649029	KnowTID_00000908	00710	-	26647048	26649029	0,0,0	1	1981	0
chr10	28920295	28924162	NovelTID_00000478	00309	+	28920295	28924162	0,0,0	2	1247,812	0,3055
chr10	28926069	28929095	KnowTID_00000682	00510	+	28926069	28929095	0,0,0	1	3026	0
chr10	28928202	28930710	KnowTID_00000683	00510	+	28928202	28930710	0,0,0	1	2508	0
chr10	29517122	29518751	KnowTID_00000684	00511	+	29517122	29518751	0,0,0	1	1629	0
chr10	29632041	29634256	KnowTID_00000685	00512	+	29632041	29634256	0,0,0	3	540,1438,218	0,548,1997
chr10	29650406	29652324	KnowTID_00000686	00513	+	29650406	29652324	0,0,0	3	671,130,185	0,834,1733
chr10	29707930	29720414	NovelTID_00000906	00431	-	29707930	29720414	0,0,0	2	362,52	0,12432
chr10	30092723	30095367	KnowTID_00000687	00514	+	30092723	30095367	0,0,0	1	2644	0
chr10	30231565	30233929	KnowTID_00000909	00711	-	30231565	30233929	0,0,0	1	2364	0
chr10	30250719	30251836	KnowTID_00000910	00712	-	30250719	30251836	0,0,0	1	1117	0
chr10	30964827	30967200	KnowTID_00000911	00713	-	30964827	30967200	0,0,0	1	2373	0
chr10	31168062	31171888	KnowTID_00000912	00714	-	31168062	31171888	0,0,0	1	3826	0
chr10	31213840	31216742	KnowTID_00000913	00715	-	31213840	31216742	0,0,0	1	2902	0
chr10	32800359	32803237	KnowTID_00000688	00515	+	32800359	32803237	0,0,0	1	2878	0
chr10	33196920	33197278	KnowTID_00000914	00716	-	33196920	33197278	0,0,0	1	358	0
chr10	33570715	33575249	NovelTID_00000479	00310	+	33570715	33575249	0,0,0	2	163,228	0,4306
chr10	33709588	33712046	KnowTID_00000915	00717	-	33709588	33712046	0,0,0	1	2458	0
chr10	33950024	33953579	KnowTID_00000916	00718	-	33950024	33953579	0,0,0	5	173,168,108,290,36	0,688,1100,3065,3519
chr10	33962618	33965395	KnowTID_00000917	00719	-	33962618	33965395	0,0,0	1	2777	0
chr10	33986816	33989766	NovelTID_00000480	00311	+	33986816	33989766	0,0,0	3	32,90,179	0,1748,2771
chr10	34620278	34620659	NovelTID_00000481	00312	+	34620278	34620659	0,0,0	2	76,186	0,195
chr10	35198632	35205202	KnowTID_00000918	00720	-	35198632	35205202	0,0,0	2	316,239	0,6331
chr10	35519407	35558471	NovelTID_00000907	00432	-	35519407	35558471	0,0,0	2	198,576	0,38488
chr10	35533750	35536180	KnowTID_00000689	00516	+	35533750	35536180	0,0,0	1	2430	0
chr10	36810626	36813605	NovelTID_00000908	00433	-	36810626	36813605	0,0,0	2	162,710	0,2269
chr10	36907413	37898838	KnowTID_00000919	00721	-	36907413	37898838	0,0,0	4	1119,8,9,260	0,388357,639166,991165
chr10	36983199	36983554	KnowTID_00000920	00722	-	36983199	36983554	0,0,0	1	355	0
chr10	37039175	37052985	NovelTID_00000482	00313	+	37039175	37052985	0,0,0	4	51,104,475,45	0,135,11623,13765
chr10	37057291	37099458	KnowTID_00000690	00517	+	37057291	37099458	0,0,0	3	31,62,2507	0,797,39660
chr10	37074654	37076872	KnowTID_00000691	00518	+	37074654	37076872	0,0,0	1	2218	0
chr10	37080320	37099949	KnowTID_00000921	00723	-	37080320	37099949	0,0,0	4	25,126,274,44	0,170,492,19585
chr10	37779351	37783162	KnowTID_00000692	00519	+	37779351	37783162	0,0,0	2	114,1738	0,2073
chr10	37835914	37841856	NovelTID_00000909	00434	-	37835914	37841856	0,0,0	3	239,59,94	0,1763,5848
chr10	38014879	38033652	KnowTID_00000922	00724	-	38014879	38033652	0,0,0	3	417,159,135	0,8604,18638
chr10	38889270	38893058	KnowTID_00000923	00725	-	38889270	38893058	0,0,0	1	3788	0
chr10	39619134	39627289	KnowTID_00000693	00520	+	39619134	39627289	0,0,0	2	201,478	0,7677
chr10	39619134	39627737	KnowTID_00000694	00520	+	39619134	39627737	0,0,0	2	201,2199	0,6404
chr10	39646837	39653915	NovelTID_00000483	00314	+	39646837	39653915	0,0,0	2	129,175	0,6903
chr10	39706549	39711001	NovelTID_00000910	00435	-	39706549	39711001	0,0,0	2	153,51	0,4401
chr10	39714822	39716694	KnowTID_00000924	00726	-	39714822	39716694	0,0,0	1	1872	0
chr10	39883212	39890845	NovelTID_00000484	00315	+	39883212	39890845	0,0,0	5	187,213,160,128,1677	0,667,1663,4254,5956
chr10	39883879	39890845	NovelTID_00000485	00315	+	39883879	39890845	0,0,0	4	67,160,128,1677	0,996,3587,5289
chr10	39883879	39890845	NovelTID_00000486	00315	+	39883879	39890845	0,0,0	3	213,128,1677	0,3587,5289
chr10	39883879	39896108	NovelTID_00000487	00315	+	39883879	39896108	0,0,0	4	67,160,128,720	0,996,3587,11509
chr10	39883879	39896108	NovelTID_00000488	00315	+	39883879	39896108	0,0,0	4	213,160,128,720	0,996,3587,11509
chr10	39883879	39896108	NovelTID_00000489	00315	+	39883879	39896108	0,0,0	3	213,128,720	0,3587,11509
chr10	39891544	39896108	NovelTID_00000490	00315	+	39891544	39896108	0,0,0	2	428,720	0,3844
chr10	39900553	39903498	KnowTID_00000925	00727	-	39900553	39903498	0,0,0	1	2945	0
chr10	39980739	39981139	KnowTID_00000695	00521	+	39980739	39981139	0,0,0	1	400	0
chr10	40230085	40231364	NovelTID_00000491	00316	+	40230085	40231364	0,0,0	2	1060,113	0,1166
chr10	41057415	41061180	NovelTID_00000492	00317	+	41057415	41061180	0,0,0	2	28,494	0,3271
chr10	41103353	41104035	NovelTID_00000493	00318	+	41103353	41104035	0,0,0	2	7,321	0,361
chr10	41752128	41752867	NovelTID_00000911	00436	-	41752128	41752867	0,0,0	2	362,51	0,688
chr10	41776861	41788409	NovelTID_00000912	00437	-	41776861	41788409	0,0,0	3	725,87,83	0,8939,11465
chr10	41790504	41793412	KnowTID_00000926	00728	-	41790504	41793412	0,0,0	1	2908	0
chr10	41809415	41810007	KnowTID_00000696	00522	+	41809415	41810007	0,0,0	1	592	0
chr10	42028427	42028961	KnowTID_00000697	00523	+	42028427	42028961	0,0,0	1	534	0
chr10	42273838	42278378	NovelTID_00000494	00319	+	42273838	42278378	0,0,0	2	2424,1722	0,2818
chr10	42574673	42576489	KnowTID_00000927	00729	-	42574673	42576489	0,0,0	1	1816	0
chr10	42691088	42710968	KnowTID_00000928	00730	-	42691088	42710968	0,0,0	3	1276,30,302	0,4323,19578
chr10	42695569	42697484	KnowTID_00000929	00731	-	42695569	42697484	0,0,0	1	1915	0
chr10	42932526	42934637	KnowTID_00000698	00524	+	42932526	42934637	0,0,0	1	2111	0
chr10	42940026	42941188	KnowTID_00000930	00732	-	42940026	42941188	0,0,0	1	1162	0
chr10	43379123	43383304	KnowTID_00000699	00525	+	43379123	43383304	0,0,0	2	171,3203	0,978
chr10	43432578	43449071	NovelTID_00000913	00438	-	43432578	43449071	0,0,0	2	377,139	0,16354
chr10	43460006	43461806	NovelTID_00000914	00439	-	43460006	43461806	0,0,0	2	1497,101	0,1699
chr10	43465963	43485642	KnowTID_00000700	00526	+	43465963	43485642	0,0,0	4	498,189,263,110	0,17339,18638,19569
chr10	43510297	43513839	NovelTID_00000915	00440	-	43510297	43513839	0,0,0	2	3022,171	0,3371
chr10	43546385	43553107	KnowTID_00000701	00527	+	43546385	43553107	0,0,0	2	429,631	0,6091
chr10	43789219	43795377	NovelTID_00000495	00320	+	43789219	43795377	0,0,0	2	49,820	0,5338
chr10	43832341	43868840	NovelTID_00000916	00441	-	43832341	43868840	0,0,0	2	31,442	0,36057
chr10	43987549	43988140	KnowTID_00000931	00733	-	43987549	43988140	0,0,0	1	591	0
chr10	44116583	44121433	NovelTID_00000917	00442	-	44116583	44121433	0,0,0	2	380,50	0,4800
chr10	44285403	44287245	KnowTID_00000932	00734	-	44285403	44287245	0,0,0	1	1842	0
chr10	44313105	44314429	NovelTID_00000918	00443	-	44313105	44314429	0,0,0	2	501,401	0,923
chr10	44317694	44321980	KnowTID_00000933	00735	-	44317694	44321980	0,0,0	2	761,3368	0,918
chr10	44416985	44419737	KnowTID_00000702	00528	+	44416985	44419737	0,0,0	1	2752	0
chr10	44435363	44438911	KnowTID_00000703	00529	+	44435363	44438911	0,0,0	2	189,2397	0,1151
chr10	44622540	44623267	NovelTID_00000919	00444	-	44622540	44623267	0,0,0	2	179,108	0,619
chr10	44722698	44724459	NovelTID_00000496	00321	+	44722698	44724459	0,0,0	3	50,80,208	0,640,1553
chr10	44744111	44748123	NovelTID_00000497	00322	+	44744111	44748123	0,0,0	5	54,97,173,109,202	0,234,2614,3550,3810
chr10	44744111	44748123	NovelTID_00000498	00322	+	44744111	44748123	0,0,0	5	117,97,173,109,202	0,234,2614,3550,3810
chr10	44786217	44786884	KnowTID_00000934	00736	-	44786217	44786884	0,0,0	1	667	0
chr10	44883427	44887004	KnowTID_00000704	00530	+	44883427	44887004	0,0,0	1	3577	0
chr10	44899404	44904106	KnowTID_00000705	00531	+	44899404	44904106	0,0,0	4	973,1663,138,654	0,1059,3488,4048
chr10	44899404	44904106	KnowTID_00000706	00531	+	44899404	44904106	0,0,0	3	973,1663,654	0,1059,4048
chr10	45434264	45453737	NovelTID_00000499	00323	+	45434264	45453737	0,0,0	2	330,195	0,19278
chr10	45527369	45529737	KnowTID_00000707	00532	+	45527369	45529737	0,0,0	1	2368	0
chr10	45527509	45571824	KnowTID_00000708	00532	+	45527509	45571824	0,0,0	3	253,247,1392	0,21078,42923
chr10	45701307	45702374	KnowTID_00000935	00737	-	45701307	45702374	0,0,0	1	1067	0
chr10	46054548	46057581	KnowTID_00000709	00533	+	46054548	46057581	0,0,0	1	3033	0
chr10	46471162	46478751	NovelTID_00000500	00324	+	46471162	46478751	0,0,0	2	537,43	0,7546
chr10	46735371	46755257	NovelTID_00000920	00445	-	46735371	46755257	0,0,0	3	1188,246,96	0,18904,19790
chr10	46813690	46814720	KnowTID_00000710	00534	+	46813690	46814720	0,0,0	3	384,218,418	0,389,612
chr10	47172790	47175606	KnowTID_00000711	00535	+	47172790	47175606	0,0,0	2	119,2659	0,157
chr10	48063886	48068212	KnowTID_00000712	00536	+	48063886	48068212	0,0,0	1	4326	0
chr10	48588383	48590051	KnowTID_00000713	00537	+	48588383	48590051	0,0,0	1	1668	0
chr10	48813140	48816354	KnowTID_00000936	00738	-	48813140	48816354	0,0,0	1	3214	0
chr10	48814652	48817252	KnowTID_00000937	00738	-	48814652	48817252	0,0,0	3	1640,227,714	0,1649,1886
chr10	49508632	49509973	KnowTID_00000714	00538	+	49508632	49509973	0,0,0	1	1341	0
chr10	49511366	49514575	KnowTID_00000715	00539	+	49511366	49514575	0,0,0	1	3209	0
chr10	49519135	49520885	KnowTID_00000716	00540	+	49519135	49520885	0,0,0	2	1342,401	0,1349
chr10	49527957	49530906	KnowTID_00000938	00739	-	49527957	49530906	0,0,0	1	2949	0
chr10	49699839	49701687	KnowTID_00000939	00740	-	49699839	49701687	0,0,0	1	1848	0
chr10	50004300	50006223	KnowTID_00000940	00741	-	50004300	50006223	0,0,0	2	725,277	0,1646
chr10	50611200	50614347	KnowTID_00000941	00742	-	50611200	50614347	0,0,0	1	3147	0
chr10	51240668	51244455	NovelTID_00000921	00446	-	51240668	51244455	0,0,0	2	100,102	0,3685
chr10	51246145	51250965	KnowTID_00000717	00541	+	51246145	51250965	0,0,0	4	234,214,690,95	0,1661,4028,4725
chr10	51251182	51253848	KnowTID_00000718	00542	+	51251182	51253848	0,0,0	1	2666	0
chr10	51386794	51395637	KnowTID_00000719	00543	+	51386794	51395637	0,0,0	2	97,487	0,8356
chr10	51477062	51480821	KnowTID_00000720	00544	+	51477062	51480821	0,0,0	2	39,563	0,3196
chr10	51492176	51495648	NovelTID_00000922	00447	-	51492176	51495648	0,0,0	2	296,36	0,3436
chr10	52170174	52172321	KnowTID_00000721	00545	+	52170174	52172321	0,0,0	1	2147	0
chr10	52171214	52173397	KnowTID_00000942	00743	-	52171214	52173397	0,0,0	1	2183	0
chr10	52900875	52901512	NovelTID_00000501	00325	+	52900875	52901512	0,0,0	2	269,223	0,414
chr10	52900875	52939127	NovelTID_00000502	00325	+	52900875	52939127	0,0,0	4	269,101,63,55	0,414,26013,38197
chr10	52922829	52924121	KnowTID_00000943	00744	-	52922829	52924121	0,0,0	1	1292	0
chr10	52954992	52980542	KnowTID_00000722	00546	+	52954992	52980542	0,0,0	3	314,251,598	0,18482,24952
chr10	53129687	53144078	KnowTID_00000723	00547	+	53129687	53144078	0,0,0	3	75,80,1700	0,11627,12691
chr10	53218248	53220479	KnowTID_00000944	00745	-	53218248	53220479	0,0,0	1	2231	0
chr10	53220334	53238795	KnowTID_00000945	00745	-	53220334	53238795	0,0,0	4	3179,69,131,21	0,10325,18225,18440
chr10	53517829	53523335	KnowTID_00000946	00746	-	53517829	53523335	0,0,0	2	609,155	0,5351
chr10	53795727	53800887	KnowTID_00000724	00548	+	53795727	53800887	0,0,0	3	932,181,117	0,2301,5043
chr10	55604822	55649850	NovelTID_00000923	00448	-	55604822	55649850	0,0,0	3	194,92,48	0,600,44980
chr10	56224306	56225093	KnowTID_00000725	00549	+	56224306	56225093	0,0,0	1	787	0
chr10	56300658	56301666	KnowTID_00000726	00550	+	56300658	56301666	0,0,0	1	1008	0
chr10	56629412	56634571	KnowTID_00000947	00747	-	56629412	56634571	0,0,0	3	55,1289,439	0,61,4720
chr10	56629412	56634571	KnowTID_00000948	00747	-	56629412	56634571	0,0,0	3	55,1283,439	0,67,4720
chr10	56652298	56702037	NovelTID_00000924	00449	-	56652298	56702037	0,0,0	3	541,88,168	0,1666,49571
chr10	56691794	56695721	NovelTID_00000925	00449	-	56691794	56695721	0,0,0	2	625,814	0,3113
chr10	56691794	56695721	NovelTID_00000926	00449	-	56691794	56695721	0,0,0	2	625,140	0,3787
chr10	56691794	56701754	NovelTID_00000927	00449	-	56691794	56701754	0,0,0	4	625,44,85,709	0,3113,4270,9251
chr10	56691794	56701754	NovelTID_00000928	00449	-	56691794	56701754	0,0,0	4	625,718,85,709	0,3113,4270,9251
chr10	56691794	56701754	NovelTID_00000929	00449	-	56691794	56701754	0,0,0	4	625,771,85,709	0,3113,4270,9251
chr10	56691794	56701754	NovelTID_00000930	00449	-	56691794	56701754	0,0,0	3	625,771,714	0,3113,9246
chr10	56691794	56701754	NovelTID_00000931	00449	-	56691794	56701754	0,0,0	3	625,771,709	0,3113,9251
chr10	56691794	56701754	NovelTID_00000932	00449	-	56691794	56701754	0,0,0	4	625,44,85,709	0,3787,4270,9251
chr10	56691794	56701754	NovelTID_00000933	00449	-	56691794	56701754	0,0,0	4	625,97,85,709	0,3787,4270,9251
chr10	56691794	56701754	NovelTID_00000934	00449	-	56691794	56701754	0,0,0	3	625,97,714	0,3787,9246
chr10	56691794	56701754	NovelTID_00000935	00449	-	56691794	56701754	0,0,0	3	625,97,709	0,3787,9251
chr10	56691794	56701754	NovelTID_00000936	00449	-	56691794	56701754	0,0,0	3	625,85,709	0,4270,9251
chr10	56691794	56701754	NovelTID_00000937	00449	-	56691794	56701754	0,0,0	2	625,809	0,9151
chr10	56691794	56701754	NovelTID_00000938	00449	-	56691794	56701754	0,0,0	2	625,714	0,9246
chr10	56691794	56701754	NovelTID_00000939	00449	-	56691794	56701754	0,0,0	2	625,709	0,9251
chr10	56691794	56701754	NovelTID_00000940	00449	-	56691794	56701754	0,0,0	2	3884,714	0,9246
chr10	56691794	56702037	NovelTID_00000941	00449	-	56691794	56702037	0,0,0	4	625,771,246,168	0,3113,9246,10075
chr10	56691794	56702037	NovelTID_00000942	00449	-	56691794	56702037	0,0,0	4	625,771,241,168	0,3113,9251,10075
chr10	56691794	56702037	NovelTID_00000943	00449	-	56691794	56702037	0,0,0	4	625,97,246,168	0,3787,9246,10075
chr10	56691794	56702037	NovelTID_00000944	00449	-	56691794	56702037	0,0,0	4	625,97,241,168	0,3787,9251,10075
chr10	56691794	56702037	NovelTID_00000945	00449	-	56691794	56702037	0,0,0	3	625,341,168	0,9151,10075
chr10	56691794	56702037	NovelTID_00000946	00449	-	56691794	56702037	0,0,0	3	625,246,168	0,9246,10075
chr10	56691794	56702037	NovelTID_00000947	00449	-	56691794	56702037	0,0,0	3	625,241,168	0,9251,10075
chr10	56691794	56702037	NovelTID_00000948	00449	-	56691794	56702037	0,0,0	2	625,168	0,10075
chr10	56692370	56702037	NovelTID_00000949	00449	-	56692370	56702037	0,0,0	3	3308,246,168	0,8670,9499
chr10	56692370	56702037	NovelTID_00000950	00449	-	56692370	56702037	0,0,0	3	3308,241,168	0,8675,9499
chr10	56693113	56701754	NovelTID_00000951	00449	-	56693113	56701754	0,0,0	3	1838,85,709	0,2951,7932
chr10	56693113	56701754	NovelTID_00000952	00449	-	56693113	56701754	0,0,0	3	2512,85,709	0,2951,7932
chr10	56693113	56701754	NovelTID_00000953	00449	-	56693113	56701754	0,0,0	3	2565,85,709	0,2951,7932
chr10	56693113	56701754	NovelTID_00000954	00449	-	56693113	56701754	0,0,0	2	2565,709	0,7932
chr10	56696064	56702037	NovelTID_00000955	00449	-	56696064	56702037	0,0,0	3	85,241,168	0,4981,5805
chr10	56697239	56702037	NovelTID_00000956	00449	-	56697239	56702037	0,0,0	2	4047,168	0,4630
chr10	56707840	56711604	NovelTID_00000957	00450	-	56707840	56711604	0,0,0	2	549,140	0,3624
chr10	56712033	56719295	NovelTID_00000958	00451	-	56712033	56719295	0,0,0	3	33,68,206	0,6024,7056
chr10	56836953	56856226	NovelTID_00000503	00326	+	56836953	56856226	0,0,0	2	263,49	0,19224
chr10	56836953	56884099	NovelTID_00000504	00326	+	56836953	56884099	0,0,0	4	263,36,83,6215	0,29951,30328,40931
chr10	56836953	56884099	NovelTID_00000505	00326	+	56836953	56884099	0,0,0	4	263,36,83,7259	0,29951,30328,39887
chr10	56841792	56884099	NovelTID_00000506	00326	+	56841792	56884099	0,0,0	4	99,36,83,7259	0,25112,25489,35048
chr10	56841792	56884099	NovelTID_00000507	00326	+	56841792	56884099	0,0,0	4	99,36,83,6215	0,25112,25489,36092
chr10	57012242	57024840	NovelTID_00000508	00327	+	57012242	57024840	0,0,0	2	25,347	0,12251
chr10	57198186	57206159	KnowTID_00000949	00748	-	57198186	57206159	0,0,0	4	288,230,36,171	0,5757,6658,7802
chr10	57674181	57678893	KnowTID_00000727	00551	+	57674181	57678893	0,0,0	3	89,228,1191	0,3283,3521
chr10	57714501	57718137	KnowTID_00000950	00749	-	57714501	57718137	0,0,0	1	3636	0
chr10	57908309	57909462	KnowTID_00000951	00750	-	57908309	57909462	0,0,0	1	1153	0
chr10	58730849	58778903	NovelTID_00000509	00328	+	58730849	58778903	0,0,0	3	376,49,66	0,4871,47988
chr10	58844706	58845467	KnowTID_00000728	00552	+	58844706	58845467	0,0,0	1	761	0
chr10	59127175	59132201	NovelTID_00000959	00452	-	59127175	59132201	0,0,0	2	291,40	0,4986
chr10	59382822	59383642	KnowTID_00000952	00751	-	59382822	59383642	0,0,0	1	820	0
chr10	59615591	59624672	NovelTID_00000960	00453	-	59615591	59624672	0,0,0	2	46,1036	0,8045
chr10	59738875	59740337	KnowTID_00000953	00752	-	59738875	59740337	0,0,0	1	1462	0
chr10	60494050	60500828	KnowTID_00000729	00553	+	60494050	60500828	0,0,0	3	149,777,205	0,5100,6573
chr10	60500594	60514636	KnowTID_00000954	00753	-	60500594	60514636	0,0,0	4	820,75,166,205	0,2307,13578,13837
chr10	60500594	60514636	KnowTID_00000955	00753	-	60500594	60514636	0,0,0	3	820,166,205	0,13578,13837
chr10	60505719	60514636	KnowTID_00000956	00753	-	60505719	60514636	0,0,0	3	86,166,205	0,8453,8712
chr10	60505719	60514636	KnowTID_00000957	00753	-	60505719	60514636	0,0,0	3	1119,166,205	0,8453,8712
chr10	60891620	60891995	KnowTID_00000730	00554	+	60891620	60891995	0,0,0	1	375	0
chr10	61053988	61054965	KnowTID_00000731	00555	+	61053988	61054965	0,0,0	1	977	0
chr10	61137536	61143003	KnowTID_00000958	00754	-	61137536	61143003	0,0,0	2	270,117	0,5350
chr10	61486151	61488363	KnowTID_00000732	00556	+	61486151	61488363	0,0,0	1	2212	0
chr10	61993390	61994736	NovelTID_00000510	00329	+	61993390	61994736	0,0,0	2	145,527	0,819
chr10	62065097	62066876	KnowTID_00000733	00557	+	62065097	62066876	0,0,0	1	1779	0
chr10	65338535	65370987	KnowTID_00000959	00755	-	65338535	65370987	0,0,0	6	283,189,83,151,65,39	0,7518,17752,22937,23830,32413
chr10	65583356	65586812	KnowTID_00000960	00756	-	65583356	65586812	0,0,0	3	235,82,28	0,1342,3428
chr10	66160988	66168709	KnowTID_00000734	00558	+	66160988	66168709	0,0,0	3	155,284,1844	0,3829,5877
chr10	66293722	66296422	NovelTID_00000961	00454	-	66293722	66296422	0,0,0	3	46,85,1294	0,1119,1406
chr10	66294814	66296422	NovelTID_00000962	00454	-	66294814	66296422	0,0,0	2	379,1138	0,470
chr10	66295799	66308327	NovelTID_00000963	00454	-	66295799	66308327	0,0,0	3	3519,302,1326	0,3701,11202
chr10	66299305	66300051	NovelTID_00000964	00454	-	66299305	66300051	0,0,0	2	13,551	0,195
chr10	66299305	66307129	NovelTID_00000965	00454	-	66299305	66307129	0,0,0	2	497,128	0,7696
chr10	66374892	66380610	KnowTID_00000961	00757	-	66374892	66380610	0,0,0	4	1842,769,104,187	0,1867,3711,5531
chr10	66375236	66383006	KnowTID_00000962	00757	-	66375236	66383006	0,0,0	4	1184,104,617,331	0,3367,5890,7439
chr10	66378383	66380487	KnowTID_00000963	00757	-	66378383	66380487	0,0,0	2	324,64	0,2040
chr10	66403234	66407125	NovelTID_00000511	00330	+	66403234	66407125	0,0,0	2	141,369	0,3522
chr10	66947135	66948799	KnowTID_00000964	00758	-	66947135	66948799	0,0,0	1	1664	0
chr10	66959106	66960455	KnowTID_00000965	00759	-	66959106	66960455	0,0,0	1	1349	0
chr10	66960502	66973071	NovelTID_00000966	00455	-	66960502	66973071	0,0,0	4	25,100,98,51	0,223,634,12518
chr10	66966287	66974164	NovelTID_00000512	00331	+	66966287	66974164	0,0,0	5	2041,315,144,55,680	0,3860,5658,6251,7197
chr10	66968375	66974164	NovelTID_00000513	00331	+	66968375	66974164	0,0,0	4	2087,144,55,680	0,3570,4163,5109
chr10	67031269	67034737	KnowTID_00000966	00760	-	67031269	67034737	0,0,0	1	3468	0
chr10	67031963	67034707	KnowTID_00000967	00760	-	67031963	67034707	0,0,0	2	210,364	0,2380
chr10	67049137	67054259	NovelTID_00000514	00332	+	67049137	67054259	0,0,0	4	89,227,144,264	0,2976,4057,4858
chr10	67083219	67086442	NovelTID_00000515	00333	+	67083219	67086442	0,0,0	2	41,623	0,2600
chr10	67128246	67129983	NovelTID_00000516	00334	+	67128246	67129983	0,0,0	2	153,547	0,1190
chr10	67165783	67168313	NovelTID_00000517	00335	+	67165783	67168313	0,0,0	2	233,48	0,2482
chr10	67170585	67172216	KnowTID_00000735	00559	+	67170585	67172216	0,0,0	1	1631	0
chr10	67171367	67180787	KnowTID_00000968	00761	-	67171367	67180787	0,0,0	3	110,107,472	0,7960,8948
chr10	67248491	67249441	KnowTID_00000736	00560	+	67248491	67249441	0,0,0	1	950	0
chr10	67391028	67393632	NovelTID_00000518	00336	+	67391028	67393632	0,0,0	2	22,251	0,2353
chr10	67400885	67407277	NovelTID_00000519	00337	+	67400885	67407277	0,0,0	2	302,804	0,5588
chr10	67400885	67407277	NovelTID_00000520	00337	+	67400885	67407277	0,0,0	2	350,804	0,5588
chr10	67425226	67436456	KnowTID_00000969	00762	-	67425226	67436456	0,0,0	3	278,197,16	0,8828,11214
chr10	67544209	67544668	NovelTID_00000967	00456	-	67544209	67544668	0,0,0	2	298,30	0,429
chr10	67775755	67789726	KnowTID_00000737	00561	+	67775755	67789726	0,0,0	2	203,2028	0,11943
chr10	67781820	67783890	KnowTID_00000970	00763	-	67781820	67783890	0,0,0	3	171,505,85	0,1124,1985
chr10	67787693	67790071	KnowTID_00000971	00764	-	67787693	67790071	0,0,0	1	2378	0
chr10	67873425	67876865	NovelTID_00000968	00457	-	67873425	67876865	0,0,0	2	292,31	0,3409
chr10	68366951	68367238	KnowTID_00000972	00765	-	68366951	68367238	0,0,0	1	287	0
chr10	68483487	68496636	KnowTID_00000973	00766	-	68483487	68496636	0,0,0	4	1205,203,50,260	0,1296,6948,12889
chr10	68574528	68575668	KnowTID_00000974	00767	-	68574528	68575668	0,0,0	1	1140	0
chr10	68577958	68578567	NovelTID_00000521	00338	+	68577958	68578567	0,0,0	2	98,409	0,200
chr10	68789927	68790919	KnowTID_00000975	00768	-	68789927	68790919	0,0,0	1	992	0
chr10	68901752	68902488	KnowTID_00000976	00769	-	68901752	68902488	0,0,0	1	736	0
chr10	69701765	69706086	NovelTID_00000969	00458	-	69701765	69706086	0,0,0	2	1522,25	0,4296
chr10	69774026	69775029	NovelTID_00000522	00339	+	69774026	69775029	0,0,0	2	899,22	0,981
chr10	69827994	69831366	KnowTID_00000738	00562	+	69827994	69831366	0,0,0	2	217,633	0,2739
chr10	69830445	69831366	KnowTID_00000739	00562	+	69830445	69831366	0,0,0	2	109,633	0,288
chr10	70201519	70202776	NovelTID_00000970	00459	-	70201519	70202776	0,0,0	2	136,158	0,1099
chr10	70631484	70644800	KnowTID_00000977	00770	-	70631484	70644800	0,0,0	8	1430,59,64,405,99,127,78,50	0,1638,1790,2327,3127,9122,10073,13266
chr10	70633581	70644800	KnowTID_00000978	00770	-	70633581	70644800	0,0,0	3	1129,127,50	0,7025,11169
chr10	70637502	70644787	KnowTID_00000979	00770	-	70637502	70644787	0,0,0	2	3231,37	0,7248
chr10	70664492	70667235	KnowTID_00000740	00563	+	70664492	70667235	0,0,0	2	66,363	0,2380
chr10	70748436	70754991	NovelTID_00000523	00340	+	70748436	70754991	0,0,0	3	2290,165,1122	0,2620,5433
chr10	70750672	70754991	NovelTID_00000524	00340	+	70750672	70754991	0,0,0	2	549,1122	0,3197
chr10	70773492	70776725	KnowTID_00000741	00564	+	70773492	70776725	0,0,0	4	117,120,89,1201	0,1222,1857,2032
chr10	70808904	70810380	KnowTID_00000980	00771	-	70808904	70810380	0,0,0	1	1476	0
chr10	70947056	70948266	KnowTID_00000981	00772	-	70947056	70948266	0,0,0	1	1210	0
chr10	72408310	72411029	KnowTID_00000742	00565	+	72408310	72411029	0,0,0	3	524,504,1621	0,529,1098
chr10	72408310	72411029	KnowTID_00000743	00565	+	72408310	72411029	0,0,0	3	524,504,1561	0,529,1158
chr10	72436050	72549453	KnowTID_00000982	00773	-	72436050	72549453	0,0,0	5	1393,236,116,216,28	0,4337,8689,45249,113375
chr10	74328226	74329643	KnowTID_00000983	00774	-	74328226	74329643	0,0,0	1	1417	0
chr10	74351890	74352362	KnowTID_00000984	00775	-	74351890	74352362	0,0,0	1	472	0
chr10	75093951	75098114	NovelTID_00000971	00460	-	75093951	75098114	0,0,0	3	1822,148,302	0,2505,3861
chr10	75093951	75098114	NovelTID_00000972	00460	-	75093951	75098114	0,0,0	3	1822,109,710	0,2505,3453
chr10	75096376	75097460	NovelTID_00000973	00460	-	75096376	75097460	0,0,0	2	189,56	0,1028
chr10	75298720	75300169	KnowTID_00000985	00776	-	75298720	75300169	0,0,0	1	1449	0
chr10	75808196	75809907	KnowTID_00000744	00566	+	75808196	75809907	0,0,0	1	1711	0
chr10	76111907	76113440	NovelTID_00000525	00341	+	76111907	76113440	0,0,0	2	31,220	0,1313
chr10	76147176	76149548	KnowTID_00000745	00567	+	76147176	76149548	0,0,0	1	2372	0
chr10	76189327	76193018	KnowTID_00000986	00777	-	76189327	76193018	0,0,0	2	2066,319	0,3372
chr10	76429104	76457254	NovelTID_00000974	00461	-	76429104	76457254	0,0,0	4	91,68,208,83	0,24917,26473,28067
chr10	76431566	76432967	NovelTID_00000526	00342	+	76431566	76432967	0,0,0	2	34,276	0,1125
chr10	76881120	76883684	KnowTID_00000746	00568	+	76881120	76883684	0,0,0	1	2564	0
chr10	76896251	76898413	NovelTID_00000527	00343	+	76896251	76898413	0,0,0	2	205,885	0,1277
chr10	76896251	76899847	NovelTID_00000528	00343	+	76896251	76899847	0,0,0	2	205,767	0,2829
chr10	76896251	76914014	NovelTID_00000975	00462	-	76896251	76914014	0,0,0	2	1135,1722	0,16041
chr10	76933330	76934638	NovelTID_00000529	00344	+	76933330	76934638	0,0,0	3	38,222,35	0,950,1273
chr10	76978683	76979675	KnowTID_00000747	00569	+	76978683	76979675	0,0,0	1	992	0
chr10	77083839	77084937	KnowTID_00000987	00778	-	77083839	77084937	0,0,0	1	1098	0
chr10	77356164	77358856	KnowTID_00000748	00570	+	77356164	77358856	0,0,0	2	644,270	0,2422
chr10	77356172	77356908	KnowTID_00000749	00570	+	77356172	77356908	0,0,0	1	736	0
chr10	77368622	77369170	NovelTID_00000530	00345	+	77368622	77369170	0,0,0	2	27,415	0,133
chr10	77477244	77478250	NovelTID_00000976	00463	-	77477244	77478250	0,0,0	2	620,25	0,981
chr10	77530386	77530798	NovelTID_00000531	00346	+	77530386	77530798	0,0,0	2	23,188	0,224
chr10	77591845	77593505	NovelTID_00000977	00464	-	77591845	77593505	0,0,0	2	352,17	0,1643
chr10	77711018	77726777	NovelTID_00000978	00465	-	77711018	77726777	0,0,0	3	980,113,962	0,11530,14797
chr10	77711689	77723089	NovelTID_00000979	00465	-	77711689	77723089	0,0,0	2	309,541	0,10859
chr10	77727275	77728820	KnowTID_00000988	00779	-	77727275	77728820	0,0,0	1	1545	0
chr10	77932559	77934001	KnowTID_00000989	00780	-	77932559	77934001	0,0,0	1	1442	0
chr10	78061866	78064619	KnowTID_00000750	00571	+	78061866	78064619	0,0,0	1	2753	0
chr10	78107186	78109162	KnowTID_00000751	00572	+	78107186	78109162	0,0,0	1	1976	0
chr10	78506862	78509446	KnowTID_00000990	00781	-	78506862	78509446	0,0,0	1	2584	0
chr10	78959943	78980998	KnowTID_00000752	00573	+	78959943	78980998	0,0,0	3	128,124,144	0,6859,20911
chr10	78959943	78980998	KnowTID_00000753	00573	+	78959943	78980998	0,0,0	3	128,121,144	0,6862,20911
chr10	79229819	79232728	NovelTID_00000532	00347	+	79229819	79232728	0,0,0	2	53,2047	0,862
chr10	79449748	79450960	NovelTID_00000533	00348	+	79449748	79450960	0,0,0	2	288,699	0,513
chr10	79863389	79864420	KnowTID_00000754	00574	+	79863389	79864420	0,0,0	1	1031	0
chr10	79949742	79951053	NovelTID_00000980	00466	-	79949742	79951053	0,0,0	2	827,29	0,1282
chr10	79949742	79951173	NovelTID_00000981	00466	-	79949742	79951173	0,0,0	4	1083,13,26,10	0,1200,1304,1421
chr10	80024570	80026154	KnowTID_00000755	00575	+	80024570	80026154	0,0,0	1	1584	0
chr10	80041391	80043422	KnowTID_00000756	00576	+	80041391	80043422	0,0,0	2	429,1364	0,667
chr10	80591722	80593431	KnowTID_00000757	00577	+	80591722	80593431	0,0,0	1	1709	0
chr10	81459745	81461304	KnowTID_00000758	00578	+	81459745	81461304	0,0,0	1	1559	0
chr10	81477217	81479975	KnowTID_00000759	00579	+	81477217	81479975	0,0,0	1	2758	0
chr10	81507388	81510783	KnowTID_00000991	00782	-	81507388	81510783	0,0,0	2	637,150	0,3245
chr10	81526761	81529458	KnowTID_00000760	00580	+	81526761	81529458	0,0,0	1	2697	0
chr10	81534994	81540481	NovelTID_00000534	00349	+	81534994	81540481	0,0,0	2	49,354	0,5133
chr10	81545760	81546367	KnowTID_00000992	00783	-	81545760	81546367	0,0,0	1	607	0
chr10	81546157	81548413	KnowTID_00000761	00581	+	81546157	81548413	0,0,0	1	2256	0
chr10	81619845	81623206	KnowTID_00000762	00582	+	81619845	81623206	0,0,0	1	3361	0
chr10	81626991	81629529	KnowTID_00000763	00583	+	81626991	81629529	0,0,0	1	2538	0
chr10	81666607	81668062	NovelTID_00000535	00350	+	81666607	81668062	0,0,0	2	506,85	0,1370
chr10	81673144	81676348	KnowTID_00000993	00784	-	81673144	81676348	0,0,0	1	3204	0
chr10	81778119	81779304	KnowTID_00000994	00785	-	81778119	81779304	0,0,0	1	1185	0
chr10	81831330	81839446	KnowTID_00000764	00584	+	81831330	81839446	0,0,0	3	112,61,141	0,312,7975
chr10	81914113	81915515	KnowTID_00000765	00585	+	81914113	81915515	0,0,0	1	1402	0
chr10	82050152	82053008	KnowTID_00000995	00786	-	82050152	82053008	0,0,0	1	2856	0
chr10	82253645	82268166	KnowTID_00000996	00787	-	82253645	82268166	0,0,0	3	148,143,43	0,7936,14478
chr10	82801334	82802158	NovelTID_00000536	00351	+	82801334	82802158	0,0,0	2	283,23	0,801
chr10	82813351	82814411	NovelTID_00000537	00352	+	82813351	82814411	0,0,0	2	25,661	0,399
chr10	82863093	82866626	KnowTID_00000997	00788	-	82863093	82866626	0,0,0	1	3533	0
chr10	83005938	83006611	KnowTID_00000998	00789	-	83005938	83006611	0,0,0	1	673	0
chr10	83266897	83272156	NovelTID_00000538	00353	+	83266897	83272156	0,0,0	2	644,461	0,4798
chr10	83267489	83272156	NovelTID_00000539	00353	+	83267489	83272156	0,0,0	2	52,466	0,4201
chr10	83350846	83364493	NovelTID_00000540	00354	+	83350846	83364493	0,0,0	2	598,27	0,13620
chr10	83392744	83398670	NovelTID_00000541	00355	+	83392744	83398670	0,0,0	2	36,982	0,4944
chr10	83392744	83399146	NovelTID_00000542	00355	+	83392744	83399146	0,0,0	3	36,433,156	0,4944,6246
chr10	83399307	83399887	NovelTID_00000982	00467	-	83399307	83399887	0,0,0	2	415,90	0,490
chr10	83426163	83430749	NovelTID_00000983	00468	-	83426163	83430749	0,0,0	2	313,219	0,4367
chr10	83455472	83467605	KnowTID_00000999	00790	-	83455472	83467605	0,0,0	2	2651,76	0,12057
chr10	83499304	83563442	KnowTID_00001000	00791	-	83499304	83563442	0,0,0	5	2224,115,100,107,167	0,7000,17881,33774,63971
chr10	83564664	83569728	NovelTID_00000984	00469	-	83564664	83569728	0,0,0	3	2658,244,1081	0,3649,3983
chr10	83567006	83570583	NovelTID_00000985	00469	-	83567006	83570583	0,0,0	3	316,244,1847	0,1307,1730
chr10	83567773	83569728	NovelTID_00000986	00469	-	83567773	83569728	0,0,0	2	784,1081	0,874
chr10	83920528	83921877	NovelTID_00000543	00356	+	83920528	83921877	0,0,0	2	293,55	0,1294
chr10	83920636	83943257	NovelTID_00000544	00356	+	83920636	83943257	0,0,0	4	185,126,269,217	0,9107,12855,22404
chr10	83929750	83934386	NovelTID_00000545	00356	+	83929750	83934386	0,0,0	2	119,895	0,3741
chr10	83980789	83986015	KnowTID_00000766	00586	+	83980789	83986015	0,0,0	4	45,283,103,428	0,2629,3356,4798
chr10	84009091	84017130	KnowTID_00001001	00792	-	84009091	84017130	0,0,0	3	1851,411,154	0,2873,7885
chr10	84010161	84016083	KnowTID_00001002	00792	-	84010161	84016083	0,0,0	4	781,411,63,79	0,1803,5231,5843
chr10	84010942	84017130	KnowTID_00001003	00792	-	84010942	84017130	0,0,0	2	1433,154	0,6034
chr10	84205757	84213614	NovelTID_00000987	00470	-	84205757	84213614	0,0,0	2	1570,927	0,6930
chr10	84214910	84217988	KnowTID_00001004	00793	-	84214910	84217988	0,0,0	2	505,31	0,3047
chr10	84502951	84503671	KnowTID_00001005	00794	-	84502951	84503671	0,0,0	1	720	0
chr10	84683686	84729137	KnowTID_00001006	00795	-	84683686	84729137	0,0,0	3	661,655,244	0,10375,45207
chr10	84691792	84729137	KnowTID_00001007	00795	-	84691792	84729137	0,0,0	2	2924,244	0,37101
chr10	84801073	84802361	NovelTID_00000546	00357	+	84801073	84802361	0,0,0	2	342,47	0,1241
chr10	85166005	85167252	NovelTID_00000988	00471	-	85166005	85167252	0,0,0	2	324,82	0,1165
chr10	85276808	85278488	NovelTID_00000547	00358	+	85276808	85278488	0,0,0	2	81,776	0,904
chr10	85292563	85296235	KnowTID_00000767	00587	+	85292563	85296235	0,0,0	2	31,285	0,3387
chr10	85989817	85994018	NovelTID_00000989	00472	-	85989817	85994018	0,0,0	2	266,41	0,4160
chr10	85995064	85997865	NovelTID_00000990	00473	-	85995064	85997865	0,0,0	4	42,38,238,137	0,577,1587,2664
chr10	85995617	85997865	NovelTID_00000991	00473	-	85995617	85997865	0,0,0	3	62,238,137	0,1034,2111
chr10	85996970	85997990	NovelTID_00000992	00473	-	85996970	85997990	0,0,0	2	34,262	0,758
chr10	86124930	86126700	NovelTID_00000548	00359	+	86124930	86126700	0,0,0	2	33,877	0,893
chr10	86127239	86127888	NovelTID_00000549	00360	+	86127239	86127888	0,0,0	2	79,135	0,514
chr10	86132822	86133303	NovelTID_00000550	00361	+	86132822	86133303	0,0,0	2	273,42	0,439
chr10	86693504	86701985	KnowTID_00000768	00588	+	86693504	86701985	0,0,0	4	224,117,44,365	0,4895,7780,8116
chr10	86757110	86760294	NovelTID_00000551	00362	+	86757110	86760294	0,0,0	2	33,264	0,2920
chr10	87193027	87212537	NovelTID_00000993	00474	-	87193027	87212537	0,0,0	2	249,109	0,19401
chr10	87240031	87249691	NovelTID_00000994	00475	-	87240031	87249691	0,0,0	4	180,115,158,154	0,4064,4385,9506
chr10	87240031	87261061	NovelTID_00000995	00475	-	87240031	87261061	0,0,0	6	180,115,158,100,99,163	0,4064,4385,9506,20078,20867
chr10	87247403	87253832	NovelTID_00000552	00363	+	87247403	87253832	0,0,0	2	839,31	0,6398
chr10	87429415	87430762	KnowTID_00000769	00589	+	87429415	87430762	0,0,0	1	1347	0
chr10	87443206	87446965	KnowTID_00000770	00590	+	87443206	87446965	0,0,0	2	118,832	0,2927
chr10	87500969	87502424	KnowTID_00001008	00796	-	87500969	87502424	0,0,0	1	1455	0
chr10	87512737	87514368	KnowTID_00000771	00591	+	87512737	87514368	0,0,0	1	1631	0
chr10	87531348	87542090	NovelTID_00000996	00476	-	87531348	87542090	0,0,0	2	96,905	0,9837
chr10	87538864	87540386	NovelTID_00000553	00364	+	87538864	87540386	0,0,0	2	410,909	0,613
chr10	88157818	88159472	KnowTID_00000772	00592	+	88157818	88159472	0,0,0	2	1304,284	0,1370
chr10	88337344	88338546	KnowTID_00001009	00797	-	88337344	88338546	0,0,0	1	1202	0
chr10	88779791	88790022	NovelTID_00000997	00477	-	88779791	88790022	0,0,0	2	296,28	0,10203
chr10	88798304	88807507	KnowTID_00001010	00798	-	88798304	88807507	0,0,0	2	845,139	0,9064
chr10	88849844	88850953	NovelTID_00000554	00365	+	88849844	88850953	0,0,0	2	48,907	0,202
chr10	89149113	89150607	KnowTID_00000773	00593	+	89149113	89150607	0,0,0	1	1494	0
chr10	89149115	89152108	KnowTID_00000774	00593	+	89149115	89152108	0,0,0	2	149,215	0,2778
chr10	89199517	89203938	KnowTID_00001011	00799	-	89199517	89203938	0,0,0	3	1922,162,28	0,3690,4393
chr10	90671240	90683364	KnowTID_00001012	00800	-	90671240	90683364	0,0,0	4	363,73,117,106	0,7307,8706,12018
chr10	90964047	90965878	KnowTID_00001013	00801	-	90964047	90965878	0,0,0	1	1831	0
chr10	91351573	91416325	KnowTID_00000775	00594	+	91351573	91416325	0,0,0	9	174,150,180,69,112,170,97,57,2462	0,8408,19477,19963,20605,25715,26490,60944,62290
chr10	91614694	91617812	KnowTID_00001014	00802	-	91614694	91617812	0,0,0	1	3118	0
chr10	91618595	91621874	KnowTID_00001015	00803	-	91618595	91621874	0,0,0	1	3279	0
chr10	91634045	91838118	KnowTID_00001016	00804	-	91634045	91838118	0,0,0	9	417,195,163,126,171,114,132,161,125	0,4722,85841,87567,97999,101251,113635,200424,203948
chr10	91681031	91682771	KnowTID_00001017	00805	-	91681031	91682771	0,0,0	1	1740	0
chr10	91863758	91880240	KnowTID_00000776	00595	+	91863758	91880240	0,0,0	4	31,154,66,495	0,8400,9697,15987
chr10	92106835	92114479	KnowTID_00000777	00596	+	92106835	92114479	0,0,0	2	89,2483	0,5161
chr10	92546929	92556175	NovelTID_00000555	00366	+	92546929	92556175	0,0,0	2	7767,394	0,8852
chr10	92595281	92598577	NovelTID_00000998	00478	-	92595281	92598577	0,0,0	2	1164,1047	0,2249
chr10	92621815	92623251	NovelTID_00000999	00479	-	92621815	92623251	0,0,0	2	867,51	0,1385
chr10	92780147	92785468	KnowTID_00000778	00597	+	92780147	92785468	0,0,0	2	331,252	0,5069
chr10	92798976	92811624	KnowTID_00000779	00598	+	92798976	92811624	0,0,0	3	110,144,601	0,11827,12047
chr10	92915466	92915842	NovelTID_00001000	00480	-	92915466	92915842	0,0,0	2	170,65	0,311
chr10	93088161	93089207	NovelTID_00000556	00367	+	93088161	93089207	0,0,0	2	148,57	0,989
chr10	93088222	93089250	NovelTID_00000557	00367	+	93088222	93089250	0,0,0	2	105,100	0,928
chr10	93359902	93364701	KnowTID_00000780	00599	+	93359902	93364701	0,0,0	2	38,2037	0,2762
chr10	93692709	93696390	NovelTID_00001001	00481	-	93692709	93696390	0,0,0	2	885,2283	0,1398
chr10	93697489	93701362	NovelTID_00001002	00482	-	93697489	93701362	0,0,0	2	362,131	0,3742
chr10	94133769	94136883	KnowTID_00001018	00806	-	94133769	94136883	0,0,0	1	3114	0
chr10	94136237	94151358	KnowTID_00001019	00806	-	94136237	94151358	0,0,0	3	3637,117,381	0,4838,14740
chr10	94136456	94139156	KnowTID_00001020	00806	-	94136456	94139156	0,0,0	3	1893,426,363	0,1899,2337
chr10	94138807	94139199	KnowTID_00000781	00600	+	94138807	94139199	0,0,0	1	392	0
chr10	94148449	94151364	KnowTID_00001021	00806	-	94148449	94151364	0,0,0	1	2915	0
chr10	94485366	94486157	NovelTID_00000558	00368	+	94485366	94486157	0,0,0	2	84,408	0,383
chr10	94579012	94580365	KnowTID_00001022	00807	-	94579012	94580365	0,0,0	1	1353	0
chr10	94583215	94608459	KnowTID_00001023	00808	-	94583215	94608459	0,0,0	4	1720,106,45,111	0,7514,24423,25133
chr10	94622994	94628294	KnowTID_00001024	00809	-	94622994	94628294	0,0,0	1	5300	0
chr10	94798909	94825850	KnowTID_00000782	00601	+	94798909	94825850	0,0,0	3	280,92,270	0,21991,26671
chr10	94820612	94825944	KnowTID_00000783	00601	+	94820612	94825944	0,0,0	3	142,92,364	0,288,4968
chr10	94880008	94891274	KnowTID_00000784	00602	+	94880008	94891274	0,0,0	5	305,121,112,141,503	0,2776,4189,5480,10763
chr10	94905381	94916062	KnowTID_00001025	00810	-	94905381	94916062	0,0,0	4	675,143,943,101	0,1810,2067,10580
chr10	94905381	94923855	KnowTID_00001026	00810	-	94905381	94923855	0,0,0	5	675,143,943,81,103	0,1810,2067,17866,18371
chr10	94905381	94923855	KnowTID_00001027	00810	-	94905381	94923855	0,0,0	5	675,143,943,112,103	0,1810,2067,17866,18371
chr10	94906056	94916062	KnowTID_00001028	00810	-	94906056	94916062	0,0,0	3	1278,943,101	0,1392,9905
chr10	94906056	94923855	KnowTID_00001029	00810	-	94906056	94923855	0,0,0	4	1278,943,81,103	0,1392,17191,17696
chr10	94906056	94923855	KnowTID_00001030	00810	-	94906056	94923855	0,0,0	4	1278,943,112,103	0,1392,17191,17696
chr10	94918901	94921672	KnowTID_00000785	00603	+	94918901	94921672	0,0,0	2	289,1508	0,1263
chr10	95143442	95143758	KnowTID_00000786	00604	+	95143442	95143758	0,0,0	1	316	0
chr10	95176636	95180141	KnowTID_00001031	00811	-	95176636	95180141	0,0,0	2	607,97	0,3408
chr10	95181004	95182977	KnowTID_00001032	00812	-	95181004	95182977	0,0,0	1	1973	0
chr10	95182118	95185134	KnowTID_00001033	00812	-	95182118	95185134	0,0,0	2	172,363	0,2653
chr10	95193860	95201987	KnowTID_00000787	00605	+	95193860	95201987	0,0,0	3	276,114,280	0,3588,7847
chr10	95226255	95229115	KnowTID_00001034	00813	-	95226255	95229115	0,0,0	1	2860	0
chr10	95286610	95287046	KnowTID_00001035	00814	-	95286610	95287046	0,0,0	1	436	0
chr10	95289021	95306725	NovelTID_00001003	00483	-	95289021	95306725	0,0,0	2	1743,1413	0,16291
chr10	95289021	95306725	NovelTID_00001004	00483	-	95289021	95306725	0,0,0	2	1743,1400	0,16304
chr10	95289021	95306725	NovelTID_00001005	00483	-	95289021	95306725	0,0,0	2	1743,1249	0,16455
chr10	95289021	95306725	NovelTID_00001006	00483	-	95289021	95306725	0,0,0	2	3325,1400	0,16304
chr10	95289021	95306725	NovelTID_00001007	00483	-	95289021	95306725	0,0,0	2	3325,1249	0,16455
chr10	95307760	95310707	NovelTID_00001008	00484	-	95307760	95310707	0,0,0	2	59,298	0,2649
chr10	95355168	95359921	KnowTID_00000788	00606	+	95355168	95359921	0,0,0	4	899,107,89,576	0,1019,1666,4177
chr10	95355168	95359921	KnowTID_00000789	00606	+	95355168	95359921	0,0,0	4	899,112,89,576	0,1019,1666,4177
chr10	95355168	95359921	KnowTID_00000790	00606	+	95355168	95359921	0,0,0	4	899,139,89,576	0,1019,1666,4177
chr10	95355168	95359921	KnowTID_00000791	00606	+	95355168	95359921	0,0,0	3	899,89,576	0,1666,4177
chr10	95643975	95645285	NovelTID_00000559	00369	+	95643975	95645285	0,0,0	2	190,40	0,1270
chr10	95662757	95683514	NovelTID_00000560	00370	+	95662757	95683514	0,0,0	3	31,164,30	0,437,20727
chr10	95688840	95711342	KnowTID_00000792	00607	+	95688840	95711342	0,0,0	3	404,117,686	0,18362,21816
chr10	95727239	95742711	NovelTID_00000561	00371	+	95727239	95742711	0,0,0	2	2334,124	0,15348
chr10	95729018	95755498	NovelTID_00000562	00371	+	95729018	95755498	0,0,0	2	555,358	0,26122
chr10	95729018	95755498	NovelTID_00000563	00371	+	95729018	95755498	0,0,0	3	555,58,358	0,13569,26122
chr10	95786887	95798067	NovelTID_00001009	00485	-	95786887	95798067	0,0,0	2	705,762	0,10418
chr10	95814926	95854929	NovelTID_00001010	00486	-	95814926	95854929	0,0,0	2	876,790	0,39213
chr10	95819860	95825110	NovelTID_00000564	00372	+	95819860	95825110	0,0,0	3	67,73,464	0,1600,4786
chr10	95829163	95830678	NovelTID_00001011	00487	-	95829163	95830678	0,0,0	2	711,204	0,1311
chr10	95943719	95950696	NovelTID_00000565	00373	+	95943719	95950696	0,0,0	2	203,48	0,6929
chr10	95958354	95986614	KnowTID_00001036	00815	-	95958354	95986614	0,0,0	2	1908,121	0,28139
chr10	95985563	95986598	KnowTID_00001037	00815	-	95985563	95986598	0,0,0	1	1035	0
chr10	96047700	96058491	NovelTID_00001012	00488	-	96047700	96058491	0,0,0	3	74,157,436	0,4709,10355
chr10	96064167	96067511	KnowTID_00001038	00816	-	96064167	96067511	0,0,0	1	3344	0
chr10	96064167	96067511	KnowTID_00001039	00816	-	96064167	96067511	0,0,0	2	921,2270	0,1074
chr10	96114479	96117090	KnowTID_00000793	00608	+	96114479	96117090	0,0,0	1	2611	0
chr10	96498401	96523693	KnowTID_00000794	00609	+	96498401	96523693	0,0,0	5	57,198,143,130,487	0,3341,4525,16599,24805
chr10	96520376	96520884	KnowTID_00000795	00610	+	96520376	96520884	0,0,0	1	508	0
chr10	96850841	96864728	NovelTID_00001013	00489	-	96850841	96864728	0,0,0	2	2701,154	0,13733
chr10	96885570	96888555	KnowTID_00001040	00817	-	96885570	96888555	0,0,0	1	2985	0
chr10	97053617	97059565	KnowTID_00001041	00818	-	97053617	97059565	0,0,0	3	940,42,483	0,4820,5465
chr10	98000111	98031670	KnowTID_00000796	00611	+	98000111	98031670	0,0,0	3	155,131,2167	0,25619,29392
chr10	98116432	98162342	KnowTID_00001042	00819	-	98116432	98162342	0,0,0	2	2494,95	0,45815
chr10	98296642	98343476	NovelTID_00001014	00490	-	98296642	98343476	0,0,0	3	99,2371,6693	0,612,40141
chr10	98296642	98343476	NovelTID_00001015	00490	-	98296642	98343476	0,0,0	2	2983,7095	0,39739
chr10	98299135	98335064	NovelTID_00001016	00490	-	98299135	98335064	0,0,0	2	490,142	0,35787
chr10	98334308	98335064	NovelTID_00001017	00490	-	98334308	98335064	0,0,0	2	393,142	0,614
chr10	98502107	98504077	KnowTID_00000797	00612	+	98502107	98504077	0,0,0	1	1970	0
chr10	98565851	98569598	NovelTID_00001018	00491	-	98565851	98569598	0,0,0	2	843,726	0,3021
chr10	98679217	98691405	NovelTID_00001019	00492	-	98679217	98691405	0,0,0	5	232,86,152,478,81	0,3156,5701,9731,12107
chr10	98679336	98682564	NovelTID_00001020	00492	-	98679336	98682564	0,0,0	2	113,191	0,3037
chr10	98682255	98691405	NovelTID_00001021	00492	-	98682255	98691405	0,0,0	5	21,86,152,478,81	0,118,2663,6693,9069
chr10	98683060	98686526	NovelTID_00001022	00492	-	98683060	98686526	0,0,0	2	165,1608	0,1858
chr10	98684938	98687649	NovelTID_00001023	00492	-	98684938	98687649	0,0,0	2	132,255	0,2456
chr10	98695699	98697206	NovelTID_00000566	00374	+	98695699	98697206	0,0,0	2	331,1082	0,425
chr10	98695699	98701173	NovelTID_00000567	00374	+	98695699	98701173	0,0,0	2	580,3524	0,1950
chr10	98695699	98701638	NovelTID_00000568	00374	+	98695699	98701638	0,0,0	4	331,155,72,319	0,425,1950,5620
chr10	98697209	98701638	NovelTID_00000569	00374	+	98697209	98701638	0,0,0	2	512,319	0,4110
chr10	98700648	98704821	NovelTID_00001024	00493	-	98700648	98704821	0,0,0	2	1759,319	0,3854
chr10	98736868	98741696	NovelTID_00000570	00375	+	98736868	98741696	0,0,0	2	781,376	0,4452
chr10	98761521	98818784	KnowTID_00000798	00613	+	98761521	98818784	0,0,0	4	515,176,37,2792	0,52195,54336,54471
chr10	98912826	98923406	NovelTID_00001025	00494	-	98912826	98923406	0,0,0	3	3043,98,588	0,6124,9992
chr10	98912826	98923406	NovelTID_00001026	00494	-	98912826	98923406	0,0,0	2	3043,588	0,9992
chr10	98918263	98922916	NovelTID_00001027	00494	-	98918263	98922916	0,0,0	2	785,98	0,4555
chr10	98918294	98922899	NovelTID_00001028	00494	-	98918294	98922899	0,0,0	3	234,98,81	0,656,4524
chr10	98919216	98922899	NovelTID_00001029	00494	-	98919216	98922899	0,0,0	2	269,81	0,3602
chr10	98922429	98924446	NovelTID_00000571	00376	+	98922429	98924446	0,0,0	2	247,856	0,1161
chr10	98922429	98952849	NovelTID_00000572	00376	+	98922429	98952849	0,0,0	3	247,713,1060	0,28549,29360
chr10	98922451	98953227	NovelTID_00000573	00376	+	98922451	98953227	0,0,0	2	225,2249	0,28527
chr10	98922451	98953227	NovelTID_00000574	00376	+	98922451	98953227	0,0,0	4	225,49,713,1438	0,23934,28527,29338
chr10	99071804	99120768	KnowTID_00000799	00614	+	99071804	99120768	0,0,0	3	85,125,1885	0,40822,47079
chr10	99101364	99104554	KnowTID_00001043	00820	-	99101364	99104554	0,0,0	3	2246,102,158	0,2784,3032
chr10	99375731	99380052	NovelTID_00000575	00377	+	99375731	99380052	0,0,0	3	103,674,398	0,3138,3923
chr10	99375756	99380052	NovelTID_00000576	00377	+	99375756	99380052	0,0,0	2	78,1183	0,3113
chr10	99383218	99415791	NovelTID_00000577	00378	+	99383218	99415791	0,0,0	2	184,314	0,32259
chr10	99385824	99388668	NovelTID_00000578	00379	+	99385824	99388668	0,0,0	2	366,720	0,2124
chr10	99606076	99606798	KnowTID_00001044	00821	-	99606076	99606798	0,0,0	1	722	0
chr10	100170168	100204269	KnowTID_00001045	00822	-	100170168	100204269	0,0,0	3	1276,169,180	0,22609,33921
chr10	100784372	100787000	KnowTID_00001046	00823	-	100784372	100787000	0,0,0	1	2628	0
chr10	101878516	101880231	KnowTID_00000800	00615	+	101878516	101880231	0,0,0	1	1715	0
chr10	102194805	102196653	NovelTID_00000579	00380	+	102194805	102196653	0,0,0	2	830,367	0,1481
chr10	102777444	102777743	KnowTID_00001047	00824	-	102777444	102777743	0,0,0	1	299	0
chr10	102797362	102819736	NovelTID_00000580	00381	+	102797362	102819736	0,0,0	2	111,512	0,21862
chr10	102970001	103029199	KnowTID_00000801	00616	+	102970001	103029199	0,0,0	3	100,43,388	0,56997,58810
chr10	104432420	104434341	KnowTID_00001048	00825	-	104432420	104434341	0,0,0	4	140,78,3,1642	0,146,233,279
chr10	105011614	105020930	KnowTID_00000802	00617	+	105011614	105020930	0,0,0	3	1129,185,1886	0,5844,7430
chr10	105511282	105516132	KnowTID_00000803	00618	+	105511282	105516132	0,0,0	1	4850	0
chr10	106637871	106642630	KnowTID_00001049	00826	-	106637871	106642630	0,0,0	2	379,3704	0,1055
chr10	106703675	106708855	NovelTID_00001030	00495	-	106703675	106708855	0,0,0	3	3870,323,506	0,4035,4674
chr10	107383700	107414888	KnowTID_00000804	00619	+	107383700	107414888	0,0,0	6	145,61,94,99,104,1860	0,11857,20012,21548,22507,29328
chr10	107589065	107590718	NovelTID_00001031	00496	-	107589065	107590718	0,0,0	2	90,300	0,1353
chr10	107714988	107716515	NovelTID_00001032	00497	-	107714988	107716515	0,0,0	2	975,453	0,1074
chr10	107879901	107882602	NovelTID_00001033	00498	-	107879901	107882602	0,0,0	2	1744,848	0,1853
chr10	107881273	107882443	NovelTID_00001034	00498	-	107881273	107882443	0,0,0	2	372,178	0,992
chr10	107883661	107886117	KnowTID_00000805	00620	+	107883661	107886117	0,0,0	2	54,1819	0,637
chr10	107922144	107923670	KnowTID_00001050	00827	-	107922144	107923670	0,0,0	1	1526	0
chr10	108448738	108451471	KnowTID_00000806	00621	+	108448738	108451471	0,0,0	1	2733	0
chr10	109085834	109086594	KnowTID_00000807	00622	+	109085834	109086594	0,0,0	1	760	0
chr10	109440947	109445532	KnowTID_00001051	00828	-	109440947	109445532	0,0,0	1	4585	0
chr10	109444965	109448486	KnowTID_00001052	00828	-	109444965	109448486	0,0,0	1	3521	0
chr10	109515746	109518023	KnowTID_00001053	00829	-	109515746	109518023	0,0,0	1	2277	0
chr10	109536874	109539960	KnowTID_00001054	00830	-	109536874	109539960	0,0,0	1	3086	0
chr10	109577762	109579045	KnowTID_00001055	00831	-	109577762	109579045	0,0,0	1	1283	0
chr10	109578581	109581235	KnowTID_00001056	00831	-	109578581	109581235	0,0,0	1	2654	0
chr10	109591323	109594885	KnowTID_00001057	00832	-	109591323	109594885	0,0,0	1	3562	0
chr10	109618285	109620696	KnowTID_00001058	00833	-	109618285	109620696	0,0,0	1	2411	0
chr10	109641049	109644470	KnowTID_00001059	00834	-	109641049	109644470	0,0,0	1	3421	0
chr10	109651770	109652817	KnowTID_00001060	00835	-	109651770	109652817	0,0,0	1	1047	0
chr10	109662939	109664584	KnowTID_00000808	00623	+	109662939	109664584	0,0,0	1	1645	0
chr10	109816563	109818717	KnowTID_00001061	00836	-	109816563	109818717	0,0,0	1	2154	0
chr10	109891743	109892900	KnowTID_00001062	00837	-	109891743	109892900	0,0,0	1	1157	0
chr10	110037705	110053017	KnowTID_00000809	00624	+	110037705	110053017	0,0,0	3	571,61,671	0,2912,14641
chr10	110080455	110084827	NovelTID_00001035	00499	-	110080455	110084827	0,0,0	2	69,174	0,4198
chr10	110511213	110520575	NovelTID_00001036	00500	-	110511213	110520575	0,0,0	3	270,91,157	0,4850,9205
chr10	110511213	110520575	NovelTID_00001037	00500	-	110511213	110520575	0,0,0	2	270,157	0,9205
chr10	110584678	110590473	NovelTID_00001038	00501	-	110584678	110590473	0,0,0	2	4217,1052	0,4743
chr10	110741051	110743393	NovelTID_00000581	00382	+	110741051	110743393	0,0,0	2	408,99	0,2243
chr10	110768853	110773476	NovelTID_00000582	00383	+	110768853	110773476	0,0,0	2	302,32	0,4591
chr10	110774179	110784241	KnowTID_00000810	00625	+	110774179	110784241	0,0,0	3	238,231,684	0,6644,9378
chr10	111019876	111047582	NovelTID_00000583	00384	+	111019876	111047582	0,0,0	3	678,105,2043	0,25158,25663
chr10	111019876	111047582	NovelTID_00000584	00384	+	111019876	111047582	0,0,0	3	678,105,2038	0,25158,25668
chr10	111019876	111048022	NovelTID_00000585	00384	+	111019876	111048022	0,0,0	4	678,105,224,440	0,25158,25663,27706
chr10	111019876	111048022	NovelTID_00000586	00384	+	111019876	111048022	0,0,0	4	678,105,219,440	0,25158,25668,27706
chr10	111023774	111031329	KnowTID_00001063	00838	-	111023774	111031329	0,0,0	4	763,154,57,170	0,2208,7230,7385
chr10	111031940	111036437	NovelTID_00000587	00384	+	111031940	111036437	0,0,0	2	322,205	0,4292
chr10	111031940	111047582	NovelTID_00000588	00384	+	111031940	111047582	0,0,0	4	322,118,105,2043	0,4292,13094,13599
chr10	111031940	111047582	NovelTID_00000589	00384	+	111031940	111047582	0,0,0	4	322,118,105,2038	0,4292,13094,13604
chr10	111031940	111047582	NovelTID_00000590	00384	+	111031940	111047582	0,0,0	4	322,118,102,2043	0,4292,13097,13599
chr10	111031940	111047582	NovelTID_00000591	00384	+	111031940	111047582	0,0,0	4	322,118,102,2038	0,4292,13097,13604
chr10	111031940	111048022	NovelTID_00000592	00384	+	111031940	111048022	0,0,0	5	322,118,105,224,440	0,4292,13094,13599,15642
chr10	111031940	111048022	NovelTID_00000593	00384	+	111031940	111048022	0,0,0	5	322,118,105,219,440	0,4292,13094,13604,15642
chr10	111031940	111048022	NovelTID_00000594	00384	+	111031940	111048022	0,0,0	5	322,118,102,224,440	0,4292,13097,13599,15642
chr10	111031940	111048022	NovelTID_00000595	00384	+	111031940	111048022	0,0,0	5	322,118,102,219,440	0,4292,13097,13604,15642
chr10	111032943	111036437	NovelTID_00000596	00384	+	111032943	111036437	0,0,0	3	290,61,205	0,3124,3289
chr10	111032943	111047582	NovelTID_00000597	00384	+	111032943	111047582	0,0,0	5	290,61,118,105,2043	0,3124,3289,12091,12596
chr10	111032943	111047582	NovelTID_00000598	00384	+	111032943	111047582	0,0,0	5	290,61,118,105,2038	0,3124,3289,12091,12601
chr10	111032943	111047582	NovelTID_00000599	00384	+	111032943	111047582	0,0,0	5	290,61,118,102,2043	0,3124,3289,12094,12596
chr10	111032943	111047582	NovelTID_00000600	00384	+	111032943	111047582	0,0,0	5	290,61,118,102,2038	0,3124,3289,12094,12601
chr10	111032943	111048022	NovelTID_00000601	00384	+	111032943	111048022	0,0,0	6	290,61,118,105,224,440	0,3124,3289,12091,12596,14639
chr10	111032943	111048022	NovelTID_00000602	00384	+	111032943	111048022	0,0,0	6	290,61,118,105,219,440	0,3124,3289,12091,12601,14639
chr10	111032943	111048022	NovelTID_00000603	00384	+	111032943	111048022	0,0,0	6	290,61,118,102,224,440	0,3124,3289,12094,12596,14639
chr10	111032943	111048022	NovelTID_00000604	00384	+	111032943	111048022	0,0,0	6	290,61,118,102,219,440	0,3124,3289,12094,12601,14639
chr10	111033639	111036437	NovelTID_00000605	00384	+	111033639	111036437	0,0,0	2	2489,205	0,2593
chr10	111033639	111047582	NovelTID_00000606	00384	+	111033639	111047582	0,0,0	4	2489,118,105,2043	0,2593,11395,11900
chr10	111033639	111047582	NovelTID_00000607	00384	+	111033639	111047582	0,0,0	4	2489,118,105,2038	0,2593,11395,11905
chr10	111033639	111047582	NovelTID_00000608	00384	+	111033639	111047582	0,0,0	4	2489,118,102,2043	0,2593,11398,11900
chr10	111033639	111047582	NovelTID_00000609	00384	+	111033639	111047582	0,0,0	4	2489,118,102,2038	0,2593,11398,11905
chr10	111033639	111048022	NovelTID_00000610	00384	+	111033639	111048022	0,0,0	5	2489,118,105,224,440	0,2593,11395,11900,13943
chr10	111033639	111048022	NovelTID_00000611	00384	+	111033639	111048022	0,0,0	5	2489,118,105,219,440	0,2593,11395,11905,13943
chr10	111033639	111048022	NovelTID_00000612	00384	+	111033639	111048022	0,0,0	5	2489,118,102,224,440	0,2593,11398,11900,13943
chr10	111033639	111048022	NovelTID_00000613	00384	+	111033639	111048022	0,0,0	5	2489,118,102,219,440	0,2593,11398,11905,13943
chr10	111044995	111047582	NovelTID_00000614	00384	+	111044995	111047582	0,0,0	2	144,2043	0,544
chr10	111044995	111047582	NovelTID_00000615	00384	+	111044995	111047582	0,0,0	2	144,2038	0,549
chr10	111044995	111048022	NovelTID_00000616	00384	+	111044995	111048022	0,0,0	3	144,224,440	0,544,2587
chr10	111044995	111048022	NovelTID_00000617	00384	+	111044995	111048022	0,0,0	3	144,219,440	0,549,2587
chr10	111291576	111311432	KnowTID_00001064	00839	-	111291576	111311432	0,0,0	6	1032,649,136,126,74,154	0,1126,4038,7414,16666,19702
chr10	111340527	111344198	KnowTID_00000811	00626	+	111340527	111344198	0,0,0	2	82,3478	0,193
chr10	112163981	112222655	KnowTID_00000812	00627	+	112163981	112222655	0,0,0	7	55,131,147,193,143,61,157	0,7947,29500,30293,32541,55763,58517
chr10	112274807	112282863	KnowTID_00000813	00628	+	112274807	112282863	0,0,0	5	130,209,137,40,572	0,2685,4426,4642,7484
chr10	112310045	112312250	KnowTID_00001065	00840	-	112310045	112312250	0,0,0	1	2205	0
chr10	112358516	112359957	KnowTID_00001066	00841	-	112358516	112359957	0,0,0	1	1441	0
chr10	112397243	112398846	KnowTID_00000814	00629	+	112397243	112398846	0,0,0	1	1603	0
chr10	112412677	112465278	KnowTID_00000815	00630	+	112412677	112465278	0,0,0	2	152,2720	0,49881
chr10	113532782	113535413	KnowTID_00000816	00631	+	113532782	113535413	0,0,0	1	2631	0
chr10	114258376	114346758	NovelTID_00001039	00502	-	114258376	114346758	0,0,0	2	1141,89	0,88293
chr10	114384942	114385478	KnowTID_00000817	00632	+	114384942	114385478	0,0,0	1	536	0
chr10	114752701	114753430	KnowTID_00000818	00633	+	114752701	114753430	0,0,0	1	729	0
chr10	114762399	114772649	NovelTID_00001040	00503	-	114762399	114772649	0,0,0	4	201,186,180,3447	0,629,2692,6803
chr10	114762894	114772649	NovelTID_00001041	00503	-	114762894	114772649	0,0,0	3	320,180,3447	0,2197,6308
chr10	114763816	114766304	NovelTID_00001042	00504	-	114763816	114766304	0,0,0	2	44,971	0,1517
chr10	116039847	116040350	KnowTID_00000819	00634	+	116039847	116040350	0,0,0	1	503	0
chr10	116111646	116116359	KnowTID_00000820	00635	+	116111646	116116359	0,0,0	4	291,115,161,351	0,1307,3912,4362
chr10	116160122	116166233	KnowTID_00001067	00842	-	116160122	116166233	0,0,0	3	190,303,101	0,469,6010
chr10	116166308	116176816	KnowTID_00000821	00636	+	116166308	116176816	0,0,0	3	200,138,889	0,1740,9619
chr10	116387617	116400335	KnowTID_00000822	00637	+	116387617	116400335	0,0,0	3	131,130,1250	0,4966,11468
chr10	116387617	116400335	KnowTID_00000823	00637	+	116387617	116400335	0,0,0	4	131,213,130,1250	0,3951,4966,11468
chr10	116387622	116396360	KnowTID_00000824	00637	+	116387622	116396360	0,0,0	3	126,130,420	0,4961,8318
chr10	116387636	116394288	KnowTID_00000825	00637	+	116387636	116394288	0,0,0	3	112,130,137	0,4947,6515
chr10	116392454	116394288	KnowTID_00000826	00637	+	116392454	116394288	0,0,0	2	259,137	0,1697
chr10	116392454	116399464	KnowTID_00000827	00637	+	116392454	116399464	0,0,0	2	259,379	0,6631
chr10	116421116	116421960	NovelTID_00001043	00505	-	116421116	116421960	0,0,0	2	322,27	0,817
chr10	116480801	116482157	KnowTID_00000828	00638	+	116480801	116482157	0,0,0	2	50,964	0,392
chr10	116585736	116587038	KnowTID_00000829	00639	+	116585736	116587038	0,0,0	1	1302	0
chr10	116597479	116599469	NovelTID_00000618	00385	+	116597479	116599469	0,0,0	2	411,37	0,1953
chr10	116601400	116609287	KnowTID_00001068	00843	-	116601400	116609287	0,0,0	2	2291,807	0,7080
chr10	116615505	116618166	KnowTID_00000830	00640	+	116615505	116618166	0,0,0	3	202,88,247	0,2156,2414
chr10	116626903	116627323	KnowTID_00001069	00844	-	116626903	116627323	0,0,0	1	420	0
chr10	116661587	116665005	KnowTID_00000831	00641	+	116661587	116665005	0,0,0	4	36,157,46,231	0,2059,3013,3187
chr10	116661644	116662010	KnowTID_00000832	00642	+	116661644	116662010	0,0,0	1	366	0
chr10	116709535	116710127	KnowTID_00001070	00845	-	116709535	116710127	0,0,0	2	131,453	0,139
chr10	116731887	116732474	KnowTID_00001071	00846	-	116731887	116732474	0,0,0	1	587	0
chr10	116817849	116822437	NovelTID_00000619	00386	+	116817849	116822437	0,0,0	2	62,1802	0,2786
chr10	116830437	116836701	NovelTID_00000620	00387	+	116830437	116836701	0,0,0	2	136,1633	0,4631
chr10	116837848	116847848	NovelTID_00001044	00506	-	116837848	116847848	0,0,0	2	741,788	0,9212
chr10	116838151	116850967	NovelTID_00001045	00506	-	116838151	116850967	0,0,0	2	438,121	0,12695
chr10	116845816	116850057	NovelTID_00001046	00506	-	116845816	116850057	0,0,0	2	1434,388	0,3853
chr10	116845816	116850967	NovelTID_00001047	00506	-	116845816	116850967	0,0,0	3	1434,137,186	0,3853,4965
chr10	116845816	116850967	NovelTID_00001048	00506	-	116845816	116850967	0,0,0	2	1541,186	0,4965
chr10	116846690	116851342	NovelTID_00001049	00506	-	116846690	116851342	0,0,0	2	560,561	0,4091
chr10	116883079	116884491	KnowTID_00001072	00847	-	116883079	116884491	0,0,0	2	303,118	0,1294
chr10	117019007	117019618	NovelTID_00000621	00388	+	117019007	117019618	0,0,0	2	272,139	0,472
chr10	117019007	117020504	NovelTID_00000622	00388	+	117019007	117020504	0,0,0	2	272,608	0,889
chr10	117147929	117149283	NovelTID_00001050	00507	-	117147929	117149283	0,0,0	2	431,43	0,1311
chr10	117153028	117155368	NovelTID_00001051	00508	-	117153028	117155368	0,0,0	2	331,38	0,2302
chr10	117301500	117305219	NovelTID_00000623	00389	+	117301500	117305219	0,0,0	3	311,177,1327	0,1654,2392
chr10	117302093	117305002	NovelTID_00000624	00389	+	117302093	117305002	0,0,0	2	1238,1110	0,1799
chr10	117336377	117341460	NovelTID_00000625	00390	+	117336377	117341460	0,0,0	5	178,152,147,107,861	0,2349,3084,3497,4222
chr10	117338584	117341757	NovelTID_00000626	00390	+	117338584	117341757	0,0,0	4	294,147,107,1158	0,877,1290,2015
chr10	117338741	117341804	NovelTID_00000627	00390	+	117338741	117341804	0,0,0	5	137,147,107,732,299	0,720,1133,1858,2764
chr10	117340454	117344057	NovelTID_00000628	00390	+	117340454	117344057	0,0,0	3	541,148,2552	0,729,1051
chr10	117340904	117341364	NovelTID_00000629	00390	+	117340904	117341364	0,0,0	2	91,181	0,279
chr10	117340904	117341364	NovelTID_00000630	00390	+	117340904	117341364	0,0,0	2	130,181	0,279
chr10	117340904	117341863	NovelTID_00000631	00390	+	117340904	117341863	0,0,0	3	130,148,358	0,279,601
chr10	117343534	117348610	NovelTID_00000632	00390	+	117343534	117348610	0,0,0	2	47,1675	0,3401
chr10	117362514	117385363	KnowTID_00000833	00643	+	117362514	117385363	0,0,0	4	232,65,177,1230	0,1288,9727,21619
chr10	117434737	117436376	NovelTID_00001052	00509	-	117434737	117436376	0,0,0	2	615,424	0,1215
chr10	117438060	117439508	NovelTID_00001053	00510	-	117438060	117439508	0,0,0	2	1092,32	0,1416
chr10	117507336	117513560	NovelTID_00001054	00511	-	117507336	117513560	0,0,0	2	358,32	0,6192
chr10	117527600	117529755	NovelTID_00000633	00391	+	117527600	117529755	0,0,0	2	527,1292	0,863
chr10	117527600	117538570	NovelTID_00000634	00391	+	117527600	117538570	0,0,0	2	527,4046	0,6924
chr10	117549572	117561150	KnowTID_00000834	00644	+	117549572	117561150	0,0,0	2	139,209	0,11369
chr10	117740463	117741035	KnowTID_00001073	00848	-	117740463	117741035	0,0,0	1	572	0
chr10	117934834	117939872	NovelTID_00000635	00392	+	117934834	117939872	0,0,0	2	26,639	0,4399
chr10	117938750	117993652	NovelTID_00001055	00512	-	117938750	117993652	0,0,0	4	670,143,127,145	0,12889,23413,54757
chr10	117948521	117950379	NovelTID_00001056	00512	-	117948521	117950379	0,0,0	2	115,1056	0,802
chr10	117948521	117993652	NovelTID_00001057	00512	-	117948521	117993652	0,0,0	4	115,143,127,145	0,3118,13642,44986
chr10	117950538	117951764	NovelTID_00001058	00512	-	117950538	117951764	0,0,0	2	718,125	0,1101
chr10	117962248	118000488	NovelTID_00001059	00512	-	117962248	118000488	0,0,0	2	42,206	0,38034
chr10	118155201	118156484	KnowTID_00001074	00849	-	118155201	118156484	0,0,0	2	557,538	0,745
chr10	118241561	118242849	NovelTID_00001060	00513	-	118241561	118242849	0,0,0	2	22,826	0,462
chr10	118269643	118272162	KnowTID_00001075	00850	-	118269643	118272162	0,0,0	1	2519	0
chr10	118292660	118293990	KnowTID_00001076	00851	-	118292660	118293990	0,0,0	1	1330	0
chr10	118312633	118313870	KnowTID_00000835	00645	+	118312633	118313870	0,0,0	1	1237	0
chr10	118315142	118319099	NovelTID_00000636	00393	+	118315142	118319099	0,0,0	2	1357,958	0,2999
chr10	118318004	118320710	KnowTID_00001077	00852	-	118318004	118320710	0,0,0	1	2706	0
chr10	118357436	118364199	KnowTID_00001078	00853	-	118357436	118364199	0,0,0	4	1650,95,510,102	0,5169,5720,6661
chr10	118363909	118373800	NovelTID_00000637	00394	+	118363909	118373800	0,0,0	3	173,250,1129	0,456,8762
chr10	118424329	118428094	NovelTID_00001061	00514	-	118424329	118428094	0,0,0	2	28,488	0,3277
chr10	118442145	118448362	NovelTID_00000638	00395	+	118442145	118448362	0,0,0	2	1425,4393	0,1824
chr10	118455401	118458726	KnowTID_00001079	00854	-	118455401	118458726	0,0,0	2	1103,710	0,2615
chr10	118465345	118487555	KnowTID_00001080	00855	-	118465345	118487555	0,0,0	4	2308,111,194,152	0,15978,21781,22058
chr10	118495572	118497535	NovelTID_00001062	00515	-	118495572	118497535	0,0,0	2	806,999	0,964
chr10	118504529	118505743	KnowTID_00000836	00646	+	118504529	118505743	0,0,0	1	1214	0
chr10	118529960	118540163	KnowTID_00000837	00647	+	118529960	118540163	0,0,0	4	29,41,89,227	0,857,2693,9976
chr10	118572219	118603441	KnowTID_00001081	00856	-	118572219	118603441	0,0,0	6	578,42,116,50,149,53	0,687,1221,3587,5518,31169
chr10	118762163	118768918	KnowTID_00000838	00648	+	118762163	118768918	0,0,0	3	230,102,252	0,5383,6503
chr10	118817425	118836513	NovelTID_00001063	00516	-	118817425	118836513	0,0,0	4	34,838,108,477	0,8594,10359,18611
chr10	118846934	118848278	KnowTID_00001082	00857	-	118846934	118848278	0,0,0	1	1344	0
chr10	118850499	118863920	KnowTID_00000839	00649	+	118850499	118863920	0,0,0	4	176,78,247,393	0,1141,1675,13028
chr10	118855457	118860395	KnowTID_00001083	00858	-	118855457	118860395	0,0,0	2	1635,399	0,4539
chr10	119718295	119719255	KnowTID_00001084	00859	-	119718295	119719255	0,0,0	1	960	0
chr10	120047336	120051832	KnowTID_00000840	00650	+	120047336	120051832	0,0,0	3	205,161,301	0,3480,4195
chr10	120047336	120051832	KnowTID_00000841	00650	+	120047336	120051832	0,0,0	3	205,119,301	0,3522,4195
chr10	120070078	120072972	KnowTID_00001085	00860	-	120070078	120072972	0,0,0	2	185,1329	0,1565
chr10	120183031	120185389	KnowTID_00001086	00861	-	120183031	120185389	0,0,0	1	2358	0
chr10	120353021	120353589	KnowTID_00001087	00862	-	120353021	120353589	0,0,0	1	568	0
chr10	120550579	120552301	KnowTID_00001088	00863	-	120550579	120552301	0,0,0	2	526,734	0,988
chr10	120572375	120580750	NovelTID_00001064	00517	-	120572375	120580750	0,0,0	2	738,500	0,7875
chr10	120596837	120598585	KnowTID_00001089	00864	-	120596837	120598585	0,0,0	1	1748	0
chr10	120622085	120622567	KnowTID_00001090	00865	-	120622085	120622567	0,0,0	1	482	0
chr10	120636196	120639705	KnowTID_00001091	00866	-	120636196	120639705	0,0,0	2	1812,174	0,3335
chr10	120672518	120680189	NovelTID_00001065	00518	-	120672518	120680189	0,0,0	2	227,151	0,7520
chr10	120690619	120691542	NovelTID_00001066	00519	-	120690619	120691542	0,0,0	2	167,389	0,534
chr10	120795077	120795867	NovelTID_00001067	00520	-	120795077	120795867	0,0,0	2	129,251	0,539
chr10	120797081	120799363	NovelTID_00001068	00521	-	120797081	120799363	0,0,0	2	29,522	0,1760
chr10	120926088	120930964	NovelTID_00000639	00396	+	120926088	120930964	0,0,0	2	23,4008	0,868
chr10	120947392	120949135	KnowTID_00000842	00651	+	120947392	120949135	0,0,0	1	1743	0
chr10	120959782	120963518	NovelTID_00000640	00397	+	120959782	120963518	0,0,0	2	242,829	0,2907
chr10	121556752	121567614	KnowTID_00000843	00652	+	121556752	121567614	0,0,0	3	213,147,160	0,7303,10702
chr10	121823906	121839736	NovelTID_00000641	00398	+	121823906	121839736	0,0,0	2	370,1432	0,14398
chr10	121823906	121839736	NovelTID_00000642	00398	+	121823906	121839736	0,0,0	2	370,1428	0,14402
chr10	121823906	121839736	NovelTID_00000643	00398	+	121823906	121839736	0,0,0	2	370,1293	0,14537
chr10	121823906	121842505	NovelTID_00000644	00398	+	121823906	121842505	0,0,0	4	370,174,197,1056	0,14398,16804,17543
chr10	121823906	121842505	NovelTID_00000645	00398	+	121823906	121842505	0,0,0	4	370,174,126,1056	0,14398,16875,17543
chr10	121823906	121842505	NovelTID_00000646	00398	+	121823906	121842505	0,0,0	3	370,174,1056	0,14398,17543
chr10	121823906	121842505	NovelTID_00000647	00398	+	121823906	121842505	0,0,0	4	370,170,197,1056	0,14402,16804,17543
chr10	121823906	121842505	NovelTID_00000648	00398	+	121823906	121842505	0,0,0	4	370,170,126,1056	0,14402,16875,17543
chr10	121823906	121842505	NovelTID_00000649	00398	+	121823906	121842505	0,0,0	3	370,170,1056	0,14402,17543
chr10	121823906	121842505	NovelTID_00000650	00398	+	121823906	121842505	0,0,0	4	370,35,197,1056	0,14537,16804,17543
chr10	121823906	121842505	NovelTID_00000651	00398	+	121823906	121842505	0,0,0	4	370,35,126,1056	0,14537,16875,17543
chr10	121823906	121842505	NovelTID_00000652	00398	+	121823906	121842505	0,0,0	3	370,35,1056	0,14537,17543
chr10	121823906	121842505	NovelTID_00000653	00398	+	121823906	121842505	0,0,0	2	370,1056	0,17543
chr10	121823906	121849095	NovelTID_00000654	00398	+	121823906	121849095	0,0,0	5	370,174,197,42,4920	0,14398,16804,17543,20269
chr10	121823906	121849095	NovelTID_00000655	00398	+	121823906	121849095	0,0,0	5	370,174,126,42,4920	0,14398,16875,17543,20269
chr10	121823906	121849095	NovelTID_00000656	00398	+	121823906	121849095	0,0,0	4	370,174,42,4920	0,14398,17543,20269
chr10	121823906	121849095	NovelTID_00000657	00398	+	121823906	121849095	0,0,0	3	370,174,4920	0,14398,20269
chr10	121823906	121849095	NovelTID_00000658	00398	+	121823906	121849095	0,0,0	5	370,170,197,42,4920	0,14402,16804,17543,20269
chr10	121823906	121849095	NovelTID_00000659	00398	+	121823906	121849095	0,0,0	5	370,170,126,42,4920	0,14402,16875,17543,20269
chr10	121823906	121849095	NovelTID_00000660	00398	+	121823906	121849095	0,0,0	4	370,170,42,4920	0,14402,17543,20269
chr10	121823906	121849095	NovelTID_00000661	00398	+	121823906	121849095	0,0,0	3	370,170,4920	0,14402,20269
chr10	121823906	121849095	NovelTID_00000662	00398	+	121823906	121849095	0,0,0	5	370,35,197,42,4920	0,14537,16804,17543,20269
chr10	121823906	121849095	NovelTID_00000663	00398	+	121823906	121849095	0,0,0	5	370,35,126,42,4920	0,14537,16875,17543,20269
chr10	121823906	121849095	NovelTID_00000664	00398	+	121823906	121849095	0,0,0	4	370,35,42,4920	0,14537,17543,20269
chr10	121823906	121849095	NovelTID_00000665	00398	+	121823906	121849095	0,0,0	3	370,35,4920	0,14537,20269
chr10	121823906	121849095	NovelTID_00000666	00398	+	121823906	121849095	0,0,0	3	370,42,4920	0,17543,20269
chr10	121823906	121849095	NovelTID_00000667	00398	+	121823906	121849095	0,0,0	2	370,4920	0,20269
chr10	121823906	121855905	NovelTID_00000668	00398	+	121823906	121855905	0,0,0	5	370,174,197,42,353	0,14398,16804,17543,31646
chr10	121823906	121855905	NovelTID_00000669	00398	+	121823906	121855905	0,0,0	5	370,174,126,42,353	0,14398,16875,17543,31646
chr10	121823906	121855905	NovelTID_00000670	00398	+	121823906	121855905	0,0,0	4	370,174,42,353	0,14398,17543,31646
chr10	121823906	121855905	NovelTID_00000671	00398	+	121823906	121855905	0,0,0	5	370,170,197,42,353	0,14402,16804,17543,31646
chr10	121823906	121855905	NovelTID_00000672	00398	+	121823906	121855905	0,0,0	5	370,170,126,42,353	0,14402,16875,17543,31646
chr10	121823906	121855905	NovelTID_00000673	00398	+	121823906	121855905	0,0,0	4	370,170,42,353	0,14402,17543,31646
chr10	121823906	121855905	NovelTID_00000674	00398	+	121823906	121855905	0,0,0	5	370,35,197,42,353	0,14537,16804,17543,31646
chr10	121823906	121855905	NovelTID_00000675	00398	+	121823906	121855905	0,0,0	5	370,35,126,42,353	0,14537,16875,17543,31646
chr10	121823906	121855905	NovelTID_00000676	00398	+	121823906	121855905	0,0,0	4	370,35,42,353	0,14537,17543,31646
chr10	121823906	121855905	NovelTID_00000677	00398	+	121823906	121855905	0,0,0	3	370,42,353	0,17543,31646
chr10	121823906	121855905	NovelTID_00000678	00398	+	121823906	121855905	0,0,0	2	370,353	0,31646
chr10	121823906	121871495	NovelTID_00000679	00398	+	121823906	121871495	0,0,0	8	370,174,197,42,128,220,136,842	0,14398,16804,17543,31646,43807,44339,46747
chr10	121823906	121871495	NovelTID_00000680	00398	+	121823906	121871495	0,0,0	7	370,174,197,42,128,220,842	0,14398,16804,17543,31646,43807,46747
chr10	121823906	121871495	NovelTID_00000681	00398	+	121823906	121871495	0,0,0	8	370,174,197,42,128,128,136,842	0,14398,16804,17543,31646,43899,44339,46747
chr10	121823906	121871495	NovelTID_00000682	00398	+	121823906	121871495	0,0,0	7	370,174,197,42,128,128,842	0,14398,16804,17543,31646,43899,46747
chr10	121823906	121871495	NovelTID_00000683	00398	+	121823906	121871495	0,0,0	7	370,174,197,42,220,136,842	0,14398,16804,17543,43807,44339,46747
chr10	121823906	121871495	NovelTID_00000684	00398	+	121823906	121871495	0,0,0	6	370,174,197,42,220,842	0,14398,16804,17543,43807,46747
chr10	121823906	121871495	NovelTID_00000685	00398	+	121823906	121871495	0,0,0	7	370,174,197,42,128,136,842	0,14398,16804,17543,43899,44339,46747
chr10	121823906	121871495	NovelTID_00000686	00398	+	121823906	121871495	0,0,0	6	370,174,197,42,128,842	0,14398,16804,17543,43899,46747
chr10	121823906	121871495	NovelTID_00000687	00398	+	121823906	121871495	0,0,0	8	370,174,126,42,128,220,136,842	0,14398,16875,17543,31646,43807,44339,46747
chr10	121823906	121871495	NovelTID_00000688	00398	+	121823906	121871495	0,0,0	7	370,174,126,42,128,220,842	0,14398,16875,17543,31646,43807,46747
chr10	121823906	121871495	NovelTID_00000689	00398	+	121823906	121871495	0,0,0	8	370,174,126,42,128,128,136,842	0,14398,16875,17543,31646,43899,44339,46747
chr10	121823906	121871495	NovelTID_00000690	00398	+	121823906	121871495	0,0,0	7	370,174,126,42,128,128,842	0,14398,16875,17543,31646,43899,46747
chr10	121823906	121871495	NovelTID_00000691	00398	+	121823906	121871495	0,0,0	7	370,174,126,42,220,136,842	0,14398,16875,17543,43807,44339,46747
chr10	121823906	121871495	NovelTID_00000692	00398	+	121823906	121871495	0,0,0	6	370,174,126,42,220,842	0,14398,16875,17543,43807,46747
chr10	121823906	121871495	NovelTID_00000693	00398	+	121823906	121871495	0,0,0	7	370,174,126,42,128,136,842	0,14398,16875,17543,43899,44339,46747
chr10	121823906	121871495	NovelTID_00000694	00398	+	121823906	121871495	0,0,0	6	370,174,126,42,128,842	0,14398,16875,17543,43899,46747
chr10	121823906	121871495	NovelTID_00000695	00398	+	121823906	121871495	0,0,0	7	370,174,42,128,220,136,842	0,14398,17543,31646,43807,44339,46747
chr10	121823906	121871495	NovelTID_00000696	00398	+	121823906	121871495	0,0,0	6	370,174,42,128,220,842	0,14398,17543,31646,43807,46747
chr10	121823906	121871495	NovelTID_00000697	00398	+	121823906	121871495	0,0,0	7	370,174,42,128,128,136,842	0,14398,17543,31646,43899,44339,46747
chr10	121823906	121871495	NovelTID_00000698	00398	+	121823906	121871495	0,0,0	6	370,174,42,128,128,842	0,14398,17543,31646,43899,46747
chr10	121823906	121871495	NovelTID_00000699	00398	+	121823906	121871495	0,0,0	6	370,174,42,220,136,842	0,14398,17543,43807,44339,46747
chr10	121823906	121871495	NovelTID_00000700	00398	+	121823906	121871495	0,0,0	5	370,174,42,220,842	0,14398,17543,43807,46747
chr10	121823906	121871495	NovelTID_00000701	00398	+	121823906	121871495	0,0,0	6	370,174,42,128,136,842	0,14398,17543,43899,44339,46747
chr10	121823906	121871495	NovelTID_00000702	00398	+	121823906	121871495	0,0,0	5	370,174,42,128,842	0,14398,17543,43899,46747
chr10	121823906	121871495	NovelTID_00000703	00398	+	121823906	121871495	0,0,0	8	370,170,197,42,128,220,136,842	0,14402,16804,17543,31646,43807,44339,46747
chr10	121823906	121871495	NovelTID_00000704	00398	+	121823906	121871495	0,0,0	7	370,170,197,42,128,220,842	0,14402,16804,17543,31646,43807,46747
chr10	121823906	121871495	NovelTID_00000705	00398	+	121823906	121871495	0,0,0	8	370,170,197,42,128,128,136,842	0,14402,16804,17543,31646,43899,44339,46747
chr10	121823906	121871495	NovelTID_00000706	00398	+	121823906	121871495	0,0,0	7	370,170,197,42,128,128,842	0,14402,16804,17543,31646,43899,46747
chr10	121823906	121871495	NovelTID_00000707	00398	+	121823906	121871495	0,0,0	7	370,170,197,42,220,136,842	0,14402,16804,17543,43807,44339,46747
chr10	121823906	121871495	NovelTID_00000708	00398	+	121823906	121871495	0,0,0	6	370,170,197,42,220,842	0,14402,16804,17543,43807,46747
chr10	121823906	121871495	NovelTID_00000709	00398	+	121823906	121871495	0,0,0	7	370,170,197,42,128,136,842	0,14402,16804,17543,43899,44339,46747
chr10	121823906	121871495	NovelTID_00000710	00398	+	121823906	121871495	0,0,0	6	370,170,197,42,128,842	0,14402,16804,17543,43899,46747
chr10	121823906	121871495	NovelTID_00000711	00398	+	121823906	121871495	0,0,0	8	370,170,126,42,128,220,136,842	0,14402,16875,17543,31646,43807,44339,46747
chr10	121823906	121871495	NovelTID_00000712	00398	+	121823906	121871495	0,0,0	7	370,170,126,42,128,220,842	0,14402,16875,17543,31646,43807,46747
chr10	121823906	121871495	NovelTID_00000713	00398	+	121823906	121871495	0,0,0	8	370,170,126,42,128,128,136,842	0,14402,16875,17543,31646,43899,44339,46747
chr10	121823906	121871495	NovelTID_00000714	00398	+	121823906	121871495	0,0,0	7	370,170,126,42,128,128,842	0,14402,16875,17543,31646,43899,46747
[truncated: 13,061 more rows]
