# Supplementary material for: Comprehensive Characterization of 10,571 Mouse Large Intergenic Noncoding RNAs from Whole Transcriptome Sequencing
Source: PLoS One. 2013 Aug 12;8(8):e70835. doi: 10.1371/journal.pone.0070835 (PMC3741367; doi:10.1371/journal.pone.0070835)
Supplement: Dataset S2 — The list of JS scores of lincRNA genes. (XLS) [file pone.0070835.s010.xls]

KnowGID_000001	0.4890	Spleen
KnowGID_000002	0.6059	Hippocampus
KnowGID_000003	0.4646	Lung
KnowGID_000004	0.3277	Spleen
KnowGID_000005	0.5871	Hippocampus
KnowGID_000006	0.4466	Spleen
KnowGID_000007	1.0000	Spleen
KnowGID_000008	0.5709	Spleen
KnowGID_000009	0.3811	Spleen
KnowGID_000010	1.0000	Lung
KnowGID_000011	0.6874	Spleen
KnowGID_000012	1.0000	Spleen
KnowGID_000013	0.3795	Spleen
KnowGID_000014	0.5616	Spleen
KnowGID_000015	0.4164	Hippocampus
KnowGID_000016	NA	NA
KnowGID_000017	0.3619	Thymus
KnowGID_000018	0.4540	Spleen
KnowGID_000019	1.0000	Thymus
KnowGID_000020	0.6305	Hippocampus
KnowGID_000021	0.8460	Hippocampus
KnowGID_000022	0.6288	Spleen
KnowGID_000023	0.7706	Spleen
KnowGID_000024	0.4168	Liver
KnowGID_000025	0.4101	Spleen
KnowGID_000026	0.4919	Lung
KnowGID_000027	0.4227	Lung
KnowGID_000028	0.4236	Hippocampus
KnowGID_000029	1.0000	Lung
KnowGID_000030	0.2006	Liver
KnowGID_000031	0.2185	Lung
KnowGID_000032	0.7990	Liver
KnowGID_000033	0.7392	Spleen
KnowGID_000034	0.2250	Liver
KnowGID_000035	0.3862	Spleen
KnowGID_000036	0.3659	Lung
KnowGID_000037	0.5318	Hippocampus
KnowGID_000038	0.3517	Heart
KnowGID_000039	0.6502	Spleen
KnowGID_000040	0.3549	Spleen
KnowGID_000041	0.4836	Thymus
KnowGID_000042	1.0000	Hippocampus
KnowGID_000043	0.8043	Hippocampus
KnowGID_000044	0.4188	Spleen
KnowGID_000045	0.4252	Spleen
KnowGID_000046	0.4260	Spleen
KnowGID_000047	0.7675	Hippocampus
KnowGID_000048	0.4827	Heart
KnowGID_000049	1.0000	Spleen
KnowGID_000050	0.4454	Spleen
KnowGID_000051	0.5273	Spleen
KnowGID_000052	0.3963	Spleen
KnowGID_000053	0.5584	Hippocampus
KnowGID_000054	0.6804	Spleen
KnowGID_000055	0.3457	Thymus
KnowGID_000056	0.4570	Spleen
KnowGID_000057	0.6353	Lung
KnowGID_000058	0.2566	Thymus
KnowGID_000059	0.3049	Thymus
KnowGID_000060	0.4204	Thymus
KnowGID_000061	0.5633	Thymus
KnowGID_000062	NA	NA
KnowGID_000063	0.4483	Spleen
KnowGID_000064	0.7893	Spleen
KnowGID_000065	0.2790	Spleen
KnowGID_000066	0.4277	Hippocampus
KnowGID_000067	0.2796	Lung
KnowGID_000068	0.3183	Lung
KnowGID_000069	0.3690	Hippocampus
KnowGID_000070	1.0000	Spleen
KnowGID_000071	0.4892	Spleen
KnowGID_000072	0.3605	Hippocampus
KnowGID_000073	0.4142	Spleen
KnowGID_000074	0.4506	Spleen
KnowGID_000075	0.8514	Liver
KnowGID_000076	0.5192	Spleen
KnowGID_000077	0.6012	Spleen
KnowGID_000078	0.5237	Spleen
KnowGID_000079	NA	NA
KnowGID_000080	0.3085	Thymus
KnowGID_000081	0.3791	Thymus
KnowGID_000082	0.4425	Hippocampus
KnowGID_000083	NA	NA
KnowGID_000084	0.5659	Heart
KnowGID_000085	NA	NA
KnowGID_000086	0.6401	Thymus
KnowGID_000087	0.5707	Spleen
KnowGID_000088	0.2852	Lung
KnowGID_000089	0.3444	Spleen
KnowGID_000090	1.0000	Heart
KnowGID_000091	0.5474	Hippocampus
KnowGID_000092	0.6019	Hippocampus
KnowGID_000093	0.3334	Hippocampus
KnowGID_000094	0.2482	Spleen
KnowGID_000095	0.4687	Spleen
KnowGID_000096	0.4450	Spleen
KnowGID_000097	0.5529	Spleen
KnowGID_000098	0.3478	Thymus
KnowGID_000099	1.0000	Spleen
KnowGID_000100	0.7138	Spleen
KnowGID_000101	0.3216	Heart
KnowGID_000102	0.5071	Spleen
KnowGID_000103	0.6188	Lung
KnowGID_000104	1.0000	Thymus
KnowGID_000105	0.3709	Lung
KnowGID_000106	0.4934	Spleen
KnowGID_000107	0.4525	Heart
KnowGID_000108	0.5145	Spleen
KnowGID_000109	0.5402	Spleen
KnowGID_000110	0.6751	Spleen
KnowGID_000111	0.4951	Lung
KnowGID_000112	0.5046	Spleen
KnowGID_000113	0.4028	Hippocampus
KnowGID_000114	0.4611	Thymus
KnowGID_000115	0.4737	Spleen
KnowGID_000116	0.4679	Spleen
KnowGID_000117	0.6640	Spleen
KnowGID_000118	0.3000	Liver
KnowGID_000119	0.6960	Spleen
KnowGID_000120	0.7277	Heart
KnowGID_000121	0.3548	Heart
KnowGID_000122	0.4665	Spleen
KnowGID_000123	0.6852	Spleen
KnowGID_000124	0.8546	Hippocampus
KnowGID_000125	0.5998	Heart
KnowGID_000126	0.2537	Hippocampus
KnowGID_000127	0.4749	Spleen
KnowGID_000128	0.3213	Spleen
KnowGID_000129	1.0000	Thymus
KnowGID_000130	0.6156	Lung
KnowGID_000131	0.4296	Spleen
KnowGID_000132	1.0000	Thymus
KnowGID_000133	0.5958	Hippocampus
KnowGID_000134	0.7044	Spleen
KnowGID_000135	0.5404	Spleen
KnowGID_000136	0.4425	Spleen
KnowGID_000137	0.6707	Hippocampus
KnowGID_000138	0.8282	Hippocampus
KnowGID_000139	0.3335	Lung
KnowGID_000140	0.6144	Thymus
KnowGID_000141	0.4799	Spleen
KnowGID_000142	0.7114	Spleen
KnowGID_000143	0.4327	Spleen
KnowGID_000144	0.4017	Spleen
KnowGID_000145	0.5191	Spleen
KnowGID_000146	0.5039	Spleen
KnowGID_000147	0.5755	Lung
KnowGID_000148	0.4528	Spleen
KnowGID_000149	0.3494	Thymus
KnowGID_000150	0.5478	Spleen
KnowGID_000151	0.4143	Spleen
KnowGID_000152	0.3908	Hippocampus
KnowGID_000153	0.5086	Liver
KnowGID_000154	0.4496	Spleen
KnowGID_000155	0.5350	Spleen
KnowGID_000156	0.4530	Spleen
KnowGID_000157	0.4477	Spleen
KnowGID_000158	0.5620	Spleen
KnowGID_000159	0.5435	Thymus
KnowGID_000160	1.0000	Spleen
KnowGID_000161	0.4347	Thymus
KnowGID_000162	0.3259	Thymus
KnowGID_000163	0.4645	Lung
KnowGID_000164	0.4404	Thymus
KnowGID_000165	NA	NA
KnowGID_000166	0.5482	Thymus
KnowGID_000167	0.7215	Thymus
KnowGID_000168	0.7028	Thymus
KnowGID_000169	0.6570	Thymus
KnowGID_000170	0.7427	Thymus
KnowGID_000171	0.7222	Thymus
KnowGID_000172	0.7027	Thymus
KnowGID_000173	NA	NA
KnowGID_000174	1.0000	Spleen
KnowGID_000175	1.0000	Spleen
KnowGID_000176	1.0000	Spleen
KnowGID_000177	0.6221	Lung
KnowGID_000178	0.4208	Spleen
KnowGID_000179	0.7670	Liver
KnowGID_000180	0.3410	Hippocampus
KnowGID_000181	0.7257	Spleen
KnowGID_000182	0.6889	Hippocampus
KnowGID_000183	NA	NA
KnowGID_000184	0.2534	Spleen
KnowGID_000185	0.6368	Spleen
KnowGID_000186	0.8180	Thymus
KnowGID_000187	0.5862	Spleen
KnowGID_000188	0.7863	Spleen
KnowGID_000189	1.0000	Spleen
KnowGID_000190	0.8679	Hippocampus
KnowGID_000191	0.3775	Thymus
KnowGID_000192	0.4691	Spleen
KnowGID_000193	0.5580	Spleen
KnowGID_000194	0.5009	Spleen
KnowGID_000195	0.4568	Spleen
KnowGID_000196	0.3705	Thymus
KnowGID_000197	0.3094	Hippocampus
KnowGID_000198	0.5009	Spleen
KnowGID_000199	0.3464	Spleen
KnowGID_000200	0.8876	Hippocampus
KnowGID_000201	1.0000	Spleen
KnowGID_000202	0.4203	Hippocampus
KnowGID_000203	0.5858	Spleen
KnowGID_000204	0.2652	Spleen
KnowGID_000205	0.4124	Spleen
KnowGID_000206	0.2352	Thymus
KnowGID_000207	0.2345	Thymus
KnowGID_000208	0.2824	Thymus
KnowGID_000209	0.3563	Spleen
KnowGID_000210	0.6500	Spleen
KnowGID_000211	0.5577	Spleen
KnowGID_000212	0.3873	Spleen
KnowGID_000213	0.3578	Lung
KnowGID_000214	0.5766	Liver
KnowGID_000215	0.4262	Spleen
KnowGID_000216	0.6301	Hippocampus
KnowGID_000217	0.3833	Liver
KnowGID_000218	0.4957	Spleen
KnowGID_000219	0.2625	Heart
KnowGID_000220	0.3608	Hippocampus
KnowGID_000221	0.3719	Spleen
KnowGID_000222	0.3247	Hippocampus
KnowGID_000223	0.3164	Heart
KnowGID_000224	0.2641	Thymus
KnowGID_000225	0.3416	Spleen
KnowGID_000226	0.3681	Hippocampus
KnowGID_000227	0.5400	Hippocampus
KnowGID_000228	0.5637	Hippocampus
KnowGID_000229	0.8652	Lung
KnowGID_000230	0.6467	Spleen
KnowGID_000231	0.4938	Lung
KnowGID_000232	0.5687	Spleen
KnowGID_000233	0.4307	Spleen
KnowGID_000234	1.0000	Thymus
KnowGID_000235	0.4827	Hippocampus
KnowGID_000236	0.4748	Hippocampus
KnowGID_000237	0.4633	Lung
KnowGID_000238	0.3345	Lung
KnowGID_000239	0.4602	Spleen
KnowGID_000240	0.4787	Hippocampus
KnowGID_000241	1.0000	Thymus
KnowGID_000242	0.5838	Spleen
KnowGID_000243	0.3446	Hippocampus
KnowGID_000244	0.5460	Hippocampus
KnowGID_000245	0.5074	Spleen
KnowGID_000246	0.5046	Thymus
KnowGID_000247	0.6567	Lung
KnowGID_000248	0.5867	Spleen
KnowGID_000249	0.3040	Hippocampus
KnowGID_000250	0.4183	Spleen
KnowGID_000251	0.7135	Spleen
KnowGID_000252	0.4565	Spleen
KnowGID_000253	0.5557	Lung
KnowGID_000254	1.0000	Liver
KnowGID_000255	0.5080	Spleen
KnowGID_000256	0.7804	Hippocampus
KnowGID_000257	0.3608	Thymus
KnowGID_000258	0.6723	Hippocampus
KnowGID_000259	0.6597	Spleen
KnowGID_000260	0.6353	Spleen
KnowGID_000261	0.5030	Spleen
KnowGID_000262	0.2571	Hippocampus
KnowGID_000263	0.6876	Thymus
KnowGID_000264	0.2623	Thymus
KnowGID_000265	0.5935	Hippocampus
KnowGID_000266	0.3657	Spleen
KnowGID_000267	0.6226	Spleen
KnowGID_000268	0.4086	Hippocampus
KnowGID_000269	0.5750	Heart
KnowGID_000270	0.2116	Heart
KnowGID_000271	0.7288	Spleen
KnowGID_000272	0.6859	Spleen
KnowGID_000273	1.0000	Spleen
KnowGID_000274	0.4728	Spleen
KnowGID_000275	0.5419	Liver
KnowGID_000276	0.4596	Spleen
KnowGID_000277	0.5937	Spleen
KnowGID_000278	0.5504	Spleen
KnowGID_000279	0.4505	Thymus
KnowGID_000280	0.3420	Spleen
KnowGID_000281	1.0000	Spleen
KnowGID_000282	0.6928	Spleen
KnowGID_000283	0.6179	Spleen
KnowGID_000284	0.6167	Hippocampus
KnowGID_000285	0.3511	Spleen
KnowGID_000286	1.0000	Spleen
KnowGID_000287	0.3746	Spleen
KnowGID_000288	0.5631	Spleen
KnowGID_000289	0.6994	Heart
KnowGID_000290	0.6182	Hippocampus
KnowGID_000291	0.4542	Hippocampus
KnowGID_000292	NA	NA
KnowGID_000293	0.5984	Spleen
KnowGID_000294	0.8580	Hippocampus
KnowGID_000295	0.6864	Hippocampus
KnowGID_000296	0.7758	Heart
KnowGID_000297	0.4562	Thymus
KnowGID_000298	0.5278	Spleen
KnowGID_000299	0.4723	Spleen
KnowGID_000300	0.6465	Spleen
KnowGID_000301	0.5114	Spleen
KnowGID_000302	1.0000	Thymus
KnowGID_000303	0.3604	Thymus
KnowGID_000304	0.6337	Thymus
KnowGID_000305	0.7489	Lung
KnowGID_000306	0.4642	Lung
KnowGID_000307	0.4593	Hippocampus
KnowGID_000308	0.5514	Thymus
KnowGID_000309	0.6077	Spleen
KnowGID_000310	0.2705	Hippocampus
KnowGID_000311	0.2966	Lung
KnowGID_000312	0.3610	Lung
KnowGID_000313	0.5304	Spleen
KnowGID_000314	0.3689	Lung
KnowGID_000315	0.3314	Lung
KnowGID_000316	0.3814	Thymus
KnowGID_000317	0.3821	Liver
KnowGID_000318	0.3141	Hippocampus
KnowGID_000319	0.5025	Thymus
KnowGID_000320	0.5414	Spleen
KnowGID_000321	0.5259	Spleen
KnowGID_000322	0.2787	Lung
KnowGID_000323	0.3348	Spleen
KnowGID_000324	0.4436	Thymus
KnowGID_000325	0.6687	Heart
KnowGID_000326	0.6351	Spleen
KnowGID_000327	0.7283	Liver
KnowGID_000328	0.3062	Spleen
KnowGID_000329	0.5849	Thymus
KnowGID_000330	1.0000	Spleen
KnowGID_000331	0.6396	Spleen
KnowGID_000332	NA	NA
KnowGID_000333	0.5445	Lung
KnowGID_000334	0.4589	Thymus
KnowGID_000335	0.4564	Hippocampus
KnowGID_000336	0.6063	Spleen
KnowGID_000337	0.4989	Lung
KnowGID_000338	0.5369	Spleen
KnowGID_000339	0.4606	Spleen
KnowGID_000340	0.5014	Lung
KnowGID_000341	0.5130	Thymus
KnowGID_000342	0.6645	Spleen
KnowGID_000343	0.4467	Thymus
KnowGID_000344	NA	NA
KnowGID_000345	0.6575	Spleen
KnowGID_000346	0.3484	Spleen
KnowGID_000347	0.6466	Spleen
KnowGID_000348	0.4995	Spleen
KnowGID_000349	1.0000	Spleen
KnowGID_000350	0.5094	Spleen
KnowGID_000351	0.5278	Hippocampus
KnowGID_000352	NA	NA
KnowGID_000353	1.0000	Thymus
KnowGID_000354	0.3697	Lung
KnowGID_000355	NA	NA
KnowGID_000356	0.3141	Spleen
KnowGID_000357	0.4034	Liver
KnowGID_000358	NA	NA
KnowGID_000359	0.6412	Spleen
KnowGID_000360	0.4166	Thymus
KnowGID_000361	0.3287	Thymus
KnowGID_000362	0.4191	Thymus
KnowGID_000363	0.7859	Spleen
KnowGID_000364	0.2568	Thymus
KnowGID_000365	0.3383	Spleen
KnowGID_000366	0.6175	Lung
KnowGID_000367	0.3870	Spleen
KnowGID_000368	0.5642	Spleen
KnowGID_000369	0.5238	Spleen
KnowGID_000370	0.4239	Spleen
KnowGID_000371	0.4328	Hippocampus
KnowGID_000372	0.6036	Hippocampus
KnowGID_000373	0.8633	Hippocampus
KnowGID_000374	0.6417	Spleen
KnowGID_000375	0.5976	Spleen
KnowGID_000376	0.3845	Spleen
KnowGID_000377	0.7447	Spleen
KnowGID_000378	0.2370	Hippocampus
KnowGID_000379	0.5915	Thymus
KnowGID_000380	0.5825	Spleen
KnowGID_000381	0.4245	Hippocampus
KnowGID_000382	0.4210	Spleen
KnowGID_000383	0.6120	Hippocampus
KnowGID_000384	0.3985	Thymus
KnowGID_000385	1.0000	Spleen
KnowGID_000386	0.6069	Spleen
KnowGID_000387	1.0000	Lung
KnowGID_000388	0.3944	Spleen
KnowGID_000389	0.6697	Spleen
KnowGID_000390	0.5761	Spleen
KnowGID_000391	0.3332	Thymus
KnowGID_000392	0.4360	Hippocampus
KnowGID_000393	0.3971	Spleen
KnowGID_000394	0.5058	Spleen
KnowGID_000395	0.2990	Spleen
KnowGID_000396	0.8284	Hippocampus
KnowGID_000397	0.5848	Thymus
KnowGID_000398	0.7917	Thymus
KnowGID_000399	0.4173	Thymus
KnowGID_000400	0.4451	Thymus
KnowGID_000401	0.5075	Spleen
KnowGID_000402	0.5450	Spleen
KnowGID_000403	NA	NA
KnowGID_000404	0.5315	Thymus
KnowGID_000405	0.6991	Spleen
KnowGID_000406	0.5834	Thymus
KnowGID_000407	0.4564	Spleen
KnowGID_000408	0.3216	Spleen
KnowGID_000409	0.4707	Spleen
KnowGID_000410	0.6462	Spleen
KnowGID_000411	0.5749	Thymus
KnowGID_000412	0.8392	Hippocampus
KnowGID_000413	0.4423	Spleen
KnowGID_000414	0.4661	Spleen
KnowGID_000415	0.7439	Hippocampus
KnowGID_000416	0.6295	Spleen
KnowGID_000417	0.4261	Spleen
KnowGID_000418	0.5079	Spleen
KnowGID_000419	0.3574	Spleen
KnowGID_000420	0.7678	Lung
KnowGID_000421	0.6137	Hippocampus
KnowGID_000422	0.4420	Spleen
KnowGID_000423	0.3075	Liver
KnowGID_000424	1.0000	Spleen
KnowGID_000425	0.4907	Spleen
KnowGID_000426	0.4992	Hippocampus
KnowGID_000427	0.3305	Hippocampus
KnowGID_000428	0.5034	Spleen
KnowGID_000429	0.3176	Lung
KnowGID_000430	0.4066	Heart
KnowGID_000431	0.2252	Thymus
KnowGID_000432	0.5132	Spleen
KnowGID_000433	0.3035	Spleen
KnowGID_000434	0.5193	Hippocampus
KnowGID_000435	0.3265	Hippocampus
KnowGID_000436	0.2985	Thymus
KnowGID_000437	0.4539	Spleen
KnowGID_000438	0.3924	Hippocampus
KnowGID_000439	1.0000	Spleen
KnowGID_000440	0.6997	Spleen
KnowGID_000441	0.3486	Hippocampus
KnowGID_000442	0.3909	Hippocampus
KnowGID_000443	0.2762	Thymus
KnowGID_000444	0.4426	Lung
KnowGID_000445	0.4570	Thymus
KnowGID_000446	1.0000	Thymus
KnowGID_000447	0.3937	Thymus
KnowGID_000448	0.5281	Spleen
KnowGID_000449	0.5393	Spleen
KnowGID_000450	0.7894	Spleen
KnowGID_000451	1.0000	Spleen
KnowGID_000452	0.4037	Lung
KnowGID_000453	0.6401	Thymus
KnowGID_000454	0.7038	Spleen
KnowGID_000455	0.6714	Thymus
KnowGID_000456	0.4716	Hippocampus
KnowGID_000457	0.2361	Thymus
KnowGID_000458	0.6327	Spleen
KnowGID_000459	0.5060	Spleen
KnowGID_000460	0.5115	Hippocampus
KnowGID_000461	0.3992	Lung
KnowGID_000462	0.7235	Spleen
KnowGID_000463	NA	NA
KnowGID_000464	0.3546	Spleen
KnowGID_000465	NA	NA
KnowGID_000466	0.6397	Spleen
KnowGID_000467	0.6310	Hippocampus
KnowGID_000468	NA	NA
KnowGID_000469	0.5667	Spleen
KnowGID_000470	0.4451	Spleen
KnowGID_000471	0.3822	Spleen
KnowGID_000472	0.3883	Lung
KnowGID_000473	0.3642	Spleen
KnowGID_000474	0.4333	Hippocampus
KnowGID_000475	0.5377	Spleen
KnowGID_000476	0.6960	Thymus
KnowGID_000477	0.7342	Thymus
KnowGID_000478	0.2415	Lung
KnowGID_000479	0.7482	Spleen
KnowGID_000480	0.4638	Spleen
KnowGID_000481	0.5641	Spleen
KnowGID_000482	0.3073	Spleen
KnowGID_000483	0.3221	Lung
KnowGID_000484	0.3475	Spleen
KnowGID_000485	0.5008	Spleen
KnowGID_000486	0.5975	Thymus
KnowGID_000487	0.2438	Spleen
KnowGID_000488	0.4330	Spleen
KnowGID_000489	1.0000	Spleen
KnowGID_000490	0.3727	Hippocampus
KnowGID_000491	NA	NA
KnowGID_000492	0.4361	Hippocampus
KnowGID_000493	1.0000	Thymus
KnowGID_000494	0.3574	Thymus
KnowGID_000495	0.7211	Thymus
KnowGID_000496	0.4838	Spleen
KnowGID_000497	0.5763	Thymus
KnowGID_000498	0.3573	Spleen
KnowGID_000499	0.7277	Thymus
KnowGID_000500	0.5136	Spleen
KnowGID_000501	0.4744	Spleen
KnowGID_000502	0.5187	Spleen
KnowGID_000503	NA	NA
KnowGID_000504	0.4656	Spleen
KnowGID_000505	0.5852	Spleen
KnowGID_000506	0.3646	Lung
KnowGID_000507	0.7881	Liver
KnowGID_000508	0.4077	Spleen
KnowGID_000509	0.3586	Hippocampus
KnowGID_000510	0.8239	Hippocampus
KnowGID_000511	0.2849	Hippocampus
KnowGID_000512	0.6289	Spleen
KnowGID_000513	0.5154	Spleen
KnowGID_000514	0.2149	Liver
KnowGID_000515	0.3270	Spleen
KnowGID_000516	0.4764	Spleen
KnowGID_000517	0.4672	Spleen
KnowGID_000518	0.5598	Spleen
KnowGID_000519	0.4549	Heart
KnowGID_000520	0.3377	Lung
KnowGID_000521	0.3918	Spleen
KnowGID_000522	NA	NA
KnowGID_000523	NA	NA
KnowGID_000524	0.4810	Spleen
KnowGID_000525	0.5399	Spleen
KnowGID_000526	0.8067	Spleen
KnowGID_000527	0.6403	Spleen
KnowGID_000528	0.3933	Lung
KnowGID_000529	0.5997	Lung
KnowGID_000530	0.3349	Lung
KnowGID_000531	0.5421	Spleen
KnowGID_000532	0.2927	Thymus
KnowGID_000533	0.4613	Spleen
KnowGID_000534	0.3789	Hippocampus
KnowGID_000535	0.2805	Lung
KnowGID_000536	0.5969	Spleen
KnowGID_000537	0.6432	Spleen
KnowGID_000538	0.3444	Spleen
KnowGID_000539	0.5318	Hippocampus
KnowGID_000540	0.4790	Spleen
KnowGID_000541	0.5095	Spleen
KnowGID_000542	0.5976	Spleen
KnowGID_000543	1.0000	Thymus
KnowGID_000544	NA	NA
KnowGID_000545	0.7338	Spleen
KnowGID_000546	0.4592	Spleen
KnowGID_000547	0.2984	Spleen
KnowGID_000548	0.4109	Hippocampus
KnowGID_000549	0.6500	Hippocampus
KnowGID_000550	0.4253	Spleen
KnowGID_000551	0.5154	Spleen
KnowGID_000552	0.3808	Thymus
KnowGID_000553	0.6041	Spleen
KnowGID_000554	0.2662	Liver
KnowGID_000555	0.3289	Spleen
KnowGID_000556	0.4982	Spleen
KnowGID_000557	0.3451	Spleen
KnowGID_000558	0.6439	Spleen
KnowGID_000559	0.4144	Heart
KnowGID_000560	0.6226	Thymus
KnowGID_000561	0.3762	Liver
KnowGID_000562	1.0000	Spleen
KnowGID_000563	1.0000	Hippocampus
KnowGID_000564	0.3694	Spleen
KnowGID_000565	0.7398	Hippocampus
KnowGID_000566	0.2992	Lung
KnowGID_000567	0.3680	Lung
KnowGID_000568	0.3393	Heart
KnowGID_000569	0.6440	Liver
KnowGID_000570	0.5261	Spleen
KnowGID_000571	0.5778	Thymus
KnowGID_000572	0.6537	Thymus
KnowGID_000573	0.5748	Spleen
KnowGID_000574	0.2465	Lung
KnowGID_000575	0.3837	Liver
KnowGID_000576	0.3448	Spleen
KnowGID_000577	0.3088	Spleen
KnowGID_000578	0.3402	Thymus
KnowGID_000579	0.2958	Thymus
KnowGID_000580	0.3100	Thymus
KnowGID_000581	0.5567	Heart
KnowGID_000582	0.3197	Thymus
KnowGID_000583	0.2878	Thymus
KnowGID_000584	0.2652	Liver
KnowGID_000585	0.4697	Spleen
KnowGID_000586	0.2503	Hippocampus
KnowGID_000587	0.3053	Liver
KnowGID_000588	NA	NA
KnowGID_000589	0.4110	Thymus
KnowGID_000590	0.5214	Spleen
KnowGID_000591	0.3871	Spleen
KnowGID_000592	0.6726	Spleen
KnowGID_000593	0.3761	Liver
KnowGID_000594	0.5407	Spleen
KnowGID_000595	NA	NA
KnowGID_000596	0.4837	Spleen
KnowGID_000597	0.3024	Heart
KnowGID_000598	0.3371	Spleen
KnowGID_000599	0.5599	Spleen
KnowGID_000600	0.2946	Spleen
KnowGID_000601	0.7653	Heart
KnowGID_000602	0.4940	Liver
KnowGID_000603	0.4752	Spleen
KnowGID_000604	0.4793	Spleen
KnowGID_000605	0.4141	Heart
KnowGID_000606	0.5174	Liver
KnowGID_000607	0.7454	Liver
KnowGID_000608	0.5461	Spleen
KnowGID_000609	0.4656	Spleen
KnowGID_000610	0.5488	Spleen
KnowGID_000611	0.4073	Lung
KnowGID_000612	0.6587	Spleen
KnowGID_000613	0.6171	Lung
KnowGID_000614	0.4711	Spleen
KnowGID_000615	0.7963	Hippocampus
KnowGID_000616	0.4862	Spleen
KnowGID_000617	0.3458	Hippocampus
KnowGID_000618	0.5639	Spleen
KnowGID_000619	0.4761	Lung
KnowGID_000620	0.4862	Lung
KnowGID_000621	0.5617	Spleen
KnowGID_000622	1.0000	Hippocampus
KnowGID_000623	0.5155	Spleen
KnowGID_000624	0.4522	Hippocampus
KnowGID_000625	0.4737	Hippocampus
KnowGID_000626	0.5244	Spleen
KnowGID_000627	0.5676	Spleen
KnowGID_000628	1.0000	Spleen
KnowGID_000629	1.0000	Spleen
KnowGID_000630	0.6278	Spleen
KnowGID_000631	1.0000	Spleen
KnowGID_000632	0.3232	Thymus
KnowGID_000633	0.3124	Spleen
KnowGID_000634	0.6698	Spleen
KnowGID_000635	0.5672	Spleen
KnowGID_000636	0.6980	Spleen
KnowGID_000637	0.2492	Spleen
KnowGID_000638	0.6325	Heart
KnowGID_000639	0.3689	Spleen
KnowGID_000640	NA	NA
KnowGID_000641	0.3791	Liver
KnowGID_000642	0.5854	Spleen
KnowGID_000643	0.5694	Spleen
KnowGID_000644	NA	NA
KnowGID_000645	0.3600	Spleen
KnowGID_000646	0.5782	Lung
KnowGID_000647	1.0000	Spleen
KnowGID_000648	0.3418	Spleen
KnowGID_000649	0.6642	Spleen
KnowGID_000650	0.4614	Spleen
KnowGID_000651	0.3882	Spleen
KnowGID_000652	0.7538	Spleen
KnowGID_000653	0.5227	Thymus
KnowGID_000654	NA	NA
KnowGID_000655	0.4377	Spleen
KnowGID_000656	0.7310	Liver
KnowGID_000657	0.4325	Hippocampus
KnowGID_000658	0.3581	Lung
KnowGID_000659	0.3627	Spleen
KnowGID_000660	0.2751	Thymus
KnowGID_000661	0.3947	Spleen
KnowGID_000662	0.2573	Heart
KnowGID_000663	0.2510	Thymus
KnowGID_000664	0.4502	Spleen
KnowGID_000665	0.7862	Liver
KnowGID_000666	0.6781	Thymus
KnowGID_000667	0.3052	Spleen
KnowGID_000668	0.3047	Thymus
KnowGID_000669	0.3449	Spleen
KnowGID_000670	0.3481	Hippocampus
KnowGID_000671	0.2920	Spleen
KnowGID_000672	0.4327	Spleen
KnowGID_000673	0.5099	Spleen
KnowGID_000674	0.4391	Spleen
KnowGID_000675	0.3566	Spleen
KnowGID_000676	0.3376	Spleen
KnowGID_000677	0.5203	Spleen
KnowGID_000678	0.8630	Spleen
KnowGID_000679	0.4102	Spleen
KnowGID_000680	0.3518	Spleen
KnowGID_000681	0.3495	Hippocampus
KnowGID_000682	0.4272	Hippocampus
KnowGID_000683	0.4722	Spleen
KnowGID_000684	0.3148	Lung
KnowGID_000685	0.3225	Spleen
KnowGID_000686	0.3085	Spleen
KnowGID_000687	0.5990	Spleen
KnowGID_000688	0.4474	Thymus
KnowGID_000689	0.3266	Heart
KnowGID_000690	0.3351	Heart
KnowGID_000691	0.4803	Hippocampus
KnowGID_000692	NA	NA
KnowGID_000693	0.7378	Spleen
KnowGID_000694	0.4470	Thymus
KnowGID_000695	0.4379	Spleen
KnowGID_000696	0.3581	Lung
KnowGID_000697	0.5194	Hippocampus
KnowGID_000698	0.3775	Lung
KnowGID_000699	NA	NA
KnowGID_000700	0.5194	Spleen
KnowGID_000701	1.0000	Spleen
KnowGID_000702	0.3097	Thymus
KnowGID_000703	0.2899	Thymus
KnowGID_000704	0.2994	Thymus
KnowGID_000705	0.5131	Heart
KnowGID_000706	0.3528	Spleen
KnowGID_000707	0.6247	Hippocampus
KnowGID_000708	0.2694	Liver
KnowGID_000709	1.0000	Liver
KnowGID_000710	0.3261	Thymus
KnowGID_000711	0.6529	Spleen
KnowGID_000712	0.4048	Spleen
KnowGID_000713	0.6827	Spleen
KnowGID_000714	0.4879	Lung
KnowGID_000715	0.2740	Hippocampus
KnowGID_000716	1.0000	Heart
KnowGID_000717	0.5168	Hippocampus
KnowGID_000718	0.5290	Hippocampus
KnowGID_000719	0.4300	Spleen
KnowGID_000720	NA	NA
KnowGID_000721	0.5180	Spleen
KnowGID_000722	0.5858	Spleen
KnowGID_000723	0.5890	Lung
KnowGID_000724	1.0000	Lung
KnowGID_000725	0.4135	Lung
KnowGID_000726	0.4215	Liver
KnowGID_000727	0.5411	Spleen
KnowGID_000728	0.4364	Spleen
KnowGID_000729	0.4678	Spleen
KnowGID_000730	0.5459	Hippocampus
KnowGID_000731	0.4764	Hippocampus
KnowGID_000732	0.3012	Hippocampus
KnowGID_000733	0.3576	Spleen
KnowGID_000734	0.6127	Spleen
KnowGID_000735	0.5032	Spleen
KnowGID_000736	0.3007	Heart
KnowGID_000737	0.5244	Hippocampus
KnowGID_000738	0.7373	Hippocampus
KnowGID_000739	0.4058	Spleen
KnowGID_000740	1.0000	Spleen
KnowGID_000741	0.6474	Spleen
KnowGID_000742	0.5769	Thymus
KnowGID_000743	0.6875	Spleen
KnowGID_000744	0.3811	Spleen
KnowGID_000745	0.3047	Lung
KnowGID_000746	NA	NA
KnowGID_000747	0.4695	Spleen
KnowGID_000748	1.0000	Spleen
KnowGID_000749	0.2471	Hippocampus
KnowGID_000750	0.3144	Thymus
KnowGID_000751	0.5439	Spleen
KnowGID_000752	0.6217	Spleen
KnowGID_000753	0.5317	Spleen
KnowGID_000754	0.5641	Liver
KnowGID_000755	NA	NA
KnowGID_000756	0.5883	Spleen
KnowGID_000757	0.4174	Spleen
KnowGID_000758	0.7696	Spleen
KnowGID_000759	0.5855	Thymus
KnowGID_000760	0.4698	Spleen
KnowGID_000761	NA	NA
KnowGID_000762	0.5022	Spleen
KnowGID_000763	1.0000	Spleen
KnowGID_000764	0.5465	Spleen
KnowGID_000765	NA	NA
KnowGID_000766	0.4407	Spleen
KnowGID_000767	0.5864	Spleen
KnowGID_000768	0.4544	Spleen
KnowGID_000769	1.0000	Lung
KnowGID_000770	0.6411	Liver
KnowGID_000771	0.3771	Thymus
KnowGID_000772	0.6057	Spleen
KnowGID_000773	0.5355	Hippocampus
KnowGID_000774	0.5058	Spleen
KnowGID_000775	1.0000	Spleen
KnowGID_000776	0.3071	Thymus
KnowGID_000777	0.4645	Lung
KnowGID_000778	0.2963	Thymus
KnowGID_000779	0.2583	Liver
KnowGID_000780	0.5848	Spleen
KnowGID_000781	0.3806	Spleen
KnowGID_000782	0.3043	Thymus
KnowGID_000783	0.4790	Spleen
KnowGID_000784	0.3385	Spleen
KnowGID_000785	0.4385	Liver
KnowGID_000786	0.3407	Spleen
KnowGID_000787	0.6602	Liver
KnowGID_000788	0.3464	Hippocampus
KnowGID_000789	0.5932	Spleen
KnowGID_000790	0.4592	Spleen
KnowGID_000791	0.5242	Spleen
KnowGID_000792	0.4645	Spleen
KnowGID_000793	0.5993	Hippocampus
KnowGID_000794	0.6202	Spleen
KnowGID_000795	0.3813	Spleen
KnowGID_000796	0.6814	Spleen
KnowGID_000797	0.3014	Spleen
KnowGID_000798	0.4246	Spleen
KnowGID_000799	0.4313	Spleen
KnowGID_000800	0.6460	Spleen
KnowGID_000801	0.5250	Spleen
KnowGID_000802	0.5235	Hippocampus
KnowGID_000803	0.4355	Hippocampus
KnowGID_000804	0.7380	Heart
KnowGID_000805	0.6142	Spleen
KnowGID_000806	0.2824	Hippocampus
KnowGID_000807	0.4828	Spleen
KnowGID_000808	0.3485	Spleen
KnowGID_000809	0.5484	Spleen
KnowGID_000810	0.3299	Spleen
KnowGID_000811	0.8061	Spleen
KnowGID_000812	0.5799	Spleen
KnowGID_000813	0.4101	Spleen
KnowGID_000814	0.6411	Liver
KnowGID_000815	0.6961	Spleen
KnowGID_000816	0.3740	Spleen
KnowGID_000817	0.4862	Spleen
KnowGID_000818	0.4481	Thymus
KnowGID_000819	0.3713	Lung
KnowGID_000820	0.6986	Spleen
KnowGID_000821	0.3635	Lung
KnowGID_000822	0.4684	Spleen
KnowGID_000823	0.3540	Lung
KnowGID_000824	1.0000	Spleen
KnowGID_000825	0.4081	Spleen
KnowGID_000826	0.3534	Hippocampus
KnowGID_000827	0.4175	Spleen
KnowGID_000828	0.3581	Spleen
KnowGID_000829	0.5295	Hippocampus
KnowGID_000830	0.4212	Hippocampus
KnowGID_000831	0.3769	Hippocampus
KnowGID_000832	0.6955	Hippocampus
KnowGID_000833	0.6811	Hippocampus
KnowGID_000834	0.5107	Hippocampus
KnowGID_000835	0.6114	Hippocampus
KnowGID_000836	0.4875	Hippocampus
KnowGID_000837	0.7636	Hippocampus
KnowGID_000838	0.3777	Spleen
KnowGID_000839	0.5306	Spleen
KnowGID_000840	0.5170	Spleen
KnowGID_000841	0.3574	Lung
KnowGID_000842	1.0000	Spleen
KnowGID_000843	0.5218	Spleen
KnowGID_000844	0.7268	Spleen
KnowGID_000845	NA	NA
KnowGID_000846	1.0000	Lung
KnowGID_000847	1.0000	Spleen
KnowGID_000848	0.6848	Spleen
KnowGID_000849	0.5574	Lung
KnowGID_000850	0.3033	Thymus
KnowGID_000851	0.2087	Thymus
KnowGID_000852	0.3661	Lung
KnowGID_000853	0.3353	Hippocampus
KnowGID_000854	0.4456	Hippocampus
KnowGID_000855	0.6106	Lung
KnowGID_000856	0.3080	Spleen
KnowGID_000857	0.7003	Lung
KnowGID_000858	0.5069	Hippocampus
KnowGID_000859	0.5489	Spleen
KnowGID_000860	0.4801	Spleen
KnowGID_000861	0.5814	Spleen
KnowGID_000862	0.5804	Spleen
KnowGID_000863	0.4841	Lung
KnowGID_000864	0.3482	Heart
KnowGID_000865	0.6958	Lung
KnowGID_000866	0.6651	Lung
KnowGID_000867	0.3786	Hippocampus
KnowGID_000868	0.3639	Thymus
KnowGID_000869	0.5313	Spleen
KnowGID_000870	0.2983	Hippocampus
KnowGID_000871	0.3360	Hippocampus
KnowGID_000872	NA	NA
KnowGID_000873	0.3454	Hippocampus
KnowGID_000874	0.5928	Spleen
KnowGID_000875	0.8504	Spleen
KnowGID_000876	0.3205	Spleen
KnowGID_000877	0.4660	Spleen
KnowGID_000878	0.2756	Spleen
KnowGID_000879	0.5145	Hippocampus
KnowGID_000880	0.2945	Spleen
KnowGID_000881	1.0000	Thymus
KnowGID_000882	1.0000	Thymus
KnowGID_000883	0.6043	Spleen
KnowGID_000884	0.4324	Spleen
KnowGID_000885	0.2623	Liver
KnowGID_000886	NA	NA
KnowGID_000887	0.6079	Spleen
KnowGID_000888	NA	NA
KnowGID_000889	0.6438	Spleen
KnowGID_000890	0.4443	Spleen
KnowGID_000891	0.3812	Hippocampus
KnowGID_000892	0.2348	Liver
KnowGID_000893	0.3020	Hippocampus
KnowGID_000894	0.3589	Spleen
KnowGID_000895	0.5084	Spleen
KnowGID_000896	0.3611	Lung
KnowGID_000897	0.4197	Lung
KnowGID_000898	0.4884	Spleen
KnowGID_000899	0.9252	Heart
KnowGID_000900	0.4879	Spleen
KnowGID_000901	0.4260	Spleen
KnowGID_000902	0.3914	Lung
KnowGID_000903	0.3131	Spleen
KnowGID_000904	0.4500	Spleen
KnowGID_000905	0.5379	Spleen
KnowGID_000906	0.5299	Spleen
KnowGID_000907	0.4445	Spleen
KnowGID_000908	0.4507	Spleen
KnowGID_000909	0.6325	Thymus
KnowGID_000910	0.6339	Spleen
KnowGID_000911	0.7159	Thymus
KnowGID_000912	0.3645	Thymus
KnowGID_000913	0.6817	Spleen
KnowGID_000914	0.6039	Spleen
KnowGID_000915	0.7121	Lung
KnowGID_000916	0.3540	Thymus
KnowGID_000917	0.6606	Spleen
KnowGID_000918	0.7386	Spleen
KnowGID_000919	0.3244	Hippocampus
KnowGID_000920	0.6956	Lung
KnowGID_000921	0.3983	Spleen
KnowGID_000922	0.5471	Spleen
KnowGID_000923	0.4279	Spleen
KnowGID_000924	0.3735	Spleen
KnowGID_000925	0.3841	Spleen
KnowGID_000926	0.3234	Hippocampus
KnowGID_000927	0.6881	Hippocampus
KnowGID_000928	0.6493	Lung
KnowGID_000929	0.3689	Heart
KnowGID_000930	0.3546	Spleen
KnowGID_000931	0.5433	Hippocampus
KnowGID_000932	0.4462	Lung
KnowGID_000933	NA	NA
KnowGID_000934	0.2535	Spleen
KnowGID_000935	0.3630	Thymus
KnowGID_000936	0.5079	Spleen
KnowGID_000937	0.5042	Thymus
KnowGID_000938	0.3568	Heart
KnowGID_000939	0.4843	Spleen
KnowGID_000940	1.0000	Hippocampus
KnowGID_000941	0.4967	Spleen
KnowGID_000942	1.0000	Spleen
KnowGID_000943	NA	NA
KnowGID_000944	0.3243	Liver
KnowGID_000945	0.3201	Spleen
KnowGID_000946	0.2303	Thymus
KnowGID_000947	0.4933	Spleen
KnowGID_000948	0.5012	Spleen
KnowGID_000949	0.5949	Hippocampus
KnowGID_000950	0.3558	Spleen
KnowGID_000951	0.6189	Spleen
KnowGID_000952	0.5823	Spleen
KnowGID_000953	0.5456	Spleen
KnowGID_000954	0.5967	Spleen
KnowGID_000955	0.6200	Spleen
KnowGID_000956	0.4612	Spleen
KnowGID_000957	0.3052	Thymus
KnowGID_000958	0.3140	Heart
KnowGID_000959	0.2086	Lung
KnowGID_000960	1.0000	Lung
KnowGID_000961	0.3767	Thymus
KnowGID_000962	0.5456	Spleen
KnowGID_000963	0.3631	Thymus
KnowGID_000964	0.5331	Liver
KnowGID_000965	0.3079	Liver
KnowGID_000966	0.2422	Thymus
KnowGID_000967	0.5590	Spleen
KnowGID_000968	0.5493	Spleen
KnowGID_000969	0.5793	Heart
KnowGID_000970	0.3921	Spleen
KnowGID_000971	1.0000	Thymus
KnowGID_000972	NA	NA
KnowGID_000973	0.4438	Spleen
KnowGID_000974	0.3562	Thymus
KnowGID_000975	0.3493	Thymus
KnowGID_000976	0.3155	Liver
KnowGID_000977	0.2611	Hippocampus
KnowGID_000978	0.6497	Spleen
KnowGID_000979	0.3805	Liver
KnowGID_000980	0.4319	Thymus
KnowGID_000981	0.4045	Spleen
KnowGID_000982	0.3479	Lung
KnowGID_000983	0.4626	Spleen
KnowGID_000984	0.2532	Thymus
KnowGID_000985	0.3199	Hippocampus
KnowGID_000986	0.4344	Spleen
KnowGID_000987	0.4810	Spleen
KnowGID_000988	0.7812	Spleen
KnowGID_000989	0.7508	Liver
KnowGID_000990	0.4236	Thymus
KnowGID_000991	0.4328	Spleen
KnowGID_000992	0.5469	Spleen
KnowGID_000993	0.3756	Spleen
KnowGID_000994	0.5636	Spleen
KnowGID_000995	0.4627	Thymus
KnowGID_000996	0.4752	Spleen
KnowGID_000997	0.4828	Spleen
KnowGID_000998	0.4582	Spleen
KnowGID_000999	0.2780	Thymus
KnowGID_001000	0.8792	Hippocampus
KnowGID_001001	0.4203	Hippocampus
KnowGID_001002	0.2676	Thymus
KnowGID_001003	0.2982	Spleen
KnowGID_001004	0.3605	Spleen
KnowGID_001005	0.6505	Spleen
KnowGID_001006	0.5219	Spleen
KnowGID_001007	0.7007	Spleen
KnowGID_001008	0.4233	Spleen
KnowGID_001009	0.4194	Lung
KnowGID_001010	0.6270	Spleen
KnowGID_001011	NA	NA
KnowGID_001012	0.6094	Spleen
KnowGID_001013	0.2982	Hippocampus
KnowGID_001014	0.4851	Spleen
KnowGID_001015	0.5660	Spleen
KnowGID_001016	0.2546	Spleen
KnowGID_001017	0.3986	Thymus
KnowGID_001018	0.4476	Spleen
KnowGID_001019	0.2898	Hippocampus
KnowGID_001020	0.7799	Thymus
KnowGID_001021	0.7358	Hippocampus
KnowGID_001022	0.2736	Thymus
KnowGID_001023	0.4111	Thymus
KnowGID_001024	0.4137	Spleen
KnowGID_001025	0.3850	Lung
KnowGID_001026	0.4589	Spleen
KnowGID_001027	0.5751	Spleen
KnowGID_001028	1.0000	Spleen
KnowGID_001029	0.3068	Spleen
KnowGID_001030	0.4517	Thymus
KnowGID_001031	0.6115	Heart
KnowGID_001032	0.5413	Hippocampus
KnowGID_001033	0.2540	Liver
KnowGID_001034	0.6498	Spleen
KnowGID_001035	0.4772	Spleen
KnowGID_001036	0.5849	Spleen
KnowGID_001037	0.4622	Thymus
KnowGID_001038	0.5670	Spleen
KnowGID_001039	0.2612	Thymus
KnowGID_001040	0.4335	Hippocampus
KnowGID_001041	0.4766	Lung
KnowGID_001042	0.2726	Hippocampus
KnowGID_001043	0.4211	Spleen
KnowGID_001044	0.6718	Spleen
KnowGID_001045	0.3915	Thymus
KnowGID_001046	0.3259	Thymus
KnowGID_001047	0.4443	Spleen
KnowGID_001048	0.2670	Lung
KnowGID_001049	0.3576	Spleen
KnowGID_001050	0.6183	Spleen
KnowGID_001051	0.4977	Hippocampus
KnowGID_001052	0.4955	Thymus
KnowGID_001053	0.4064	Spleen
KnowGID_001054	0.4181	Thymus
KnowGID_001055	0.5565	Spleen
KnowGID_001056	1.0000	Spleen
KnowGID_001057	0.2899	Thymus
KnowGID_001058	0.4188	Spleen
KnowGID_001059	0.2602	Spleen
KnowGID_001060	0.2104	Spleen
KnowGID_001061	0.4879	Liver
KnowGID_001062	0.4498	Thymus
KnowGID_001063	1.0000	Spleen
KnowGID_001064	0.3770	Spleen
KnowGID_001065	0.5166	Spleen
KnowGID_001066	1.0000	Spleen
KnowGID_001067	0.5230	Lung
KnowGID_001068	0.5125	Spleen
KnowGID_001069	0.3798	Thymus
KnowGID_001070	0.6827	Spleen
KnowGID_001071	0.2339	Thymus
KnowGID_001072	0.5294	Spleen
KnowGID_001073	0.4489	Spleen
KnowGID_001074	0.3053	Thymus
KnowGID_001075	0.3471	Spleen
KnowGID_001076	0.2746	Thymus
KnowGID_001077	0.2778	Lung
KnowGID_001078	0.8026	Spleen
KnowGID_001079	0.2106	Liver
KnowGID_001080	0.4478	Hippocampus
KnowGID_001081	0.5908	Spleen
KnowGID_001082	0.4671	Hippocampus
KnowGID_001083	0.3887	Spleen
KnowGID_001084	0.4422	Spleen
KnowGID_001085	0.4477	Spleen
KnowGID_001086	0.2518	Thymus
KnowGID_001087	0.3673	Spleen
KnowGID_001088	0.4052	Spleen
KnowGID_001089	0.5265	Liver
KnowGID_001090	0.3309	Spleen
KnowGID_001091	0.2910	Hippocampus
KnowGID_001092	0.2698	Thymus
KnowGID_001093	0.2703	Hippocampus
KnowGID_001094	0.4807	Hippocampus
KnowGID_001095	0.5162	Spleen
KnowGID_001096	0.4890	Spleen
KnowGID_001097	0.7578	Spleen
KnowGID_001098	0.5757	Spleen
KnowGID_001099	0.5758	Spleen
KnowGID_001100	0.2787	Spleen
KnowGID_001101	0.5527	Spleen
KnowGID_001102	0.3693	Liver
KnowGID_001103	0.2455	Heart
KnowGID_001104	0.4223	Lung
KnowGID_001105	0.4606	Heart
KnowGID_001106	0.7545	Spleen
KnowGID_001107	0.5379	Spleen
KnowGID_001108	0.6088	Spleen
KnowGID_001109	0.5765	Spleen
KnowGID_001110	0.6738	Spleen
KnowGID_001111	0.5343	Spleen
KnowGID_001112	0.4573	Liver
KnowGID_001113	0.6223	Spleen
KnowGID_001114	0.3117	Lung
KnowGID_001115	0.4527	Spleen
KnowGID_001116	0.3612	Spleen
KnowGID_001117	NA	NA
KnowGID_001118	0.4403	Spleen
KnowGID_001119	0.4012	Lung
KnowGID_001120	0.3324	Thymus
KnowGID_001121	0.3499	Thymus
KnowGID_001122	0.4358	Spleen
KnowGID_001123	0.4920	Thymus
KnowGID_001124	0.3851	Hippocampus
KnowGID_001125	0.2786	Hippocampus
KnowGID_001126	0.5578	Liver
KnowGID_001127	0.5451	Spleen
KnowGID_001128	0.4618	Spleen
KnowGID_001129	0.4158	Spleen
KnowGID_001130	0.4076	Spleen
KnowGID_001131	0.5462	Heart
KnowGID_001132	NA	NA
KnowGID_001133	0.4776	Spleen
KnowGID_001134	0.4431	Spleen
KnowGID_001135	0.5145	Lung
KnowGID_001136	1.0000	Thymus
KnowGID_001137	0.4790	Spleen
KnowGID_001138	0.2863	Spleen
KnowGID_001139	0.3787	Spleen
KnowGID_001140	1.0000	Spleen
KnowGID_001141	0.5292	Liver
KnowGID_001142	0.4603	Spleen
KnowGID_001143	0.3433	Hippocampus
KnowGID_001144	0.3300	Spleen
KnowGID_001145	0.7377	Lung
KnowGID_001146	1.0000	Spleen
KnowGID_001147	0.4168	Spleen
KnowGID_001148	0.3803	Liver
KnowGID_001149	NA	NA
KnowGID_001150	0.4662	Spleen
KnowGID_001151	0.4830	Spleen
KnowGID_001152	0.5012	Spleen
KnowGID_001153	0.5798	Spleen
KnowGID_001154	0.6487	Spleen
KnowGID_001155	0.2974	Lung
KnowGID_001156	0.2419	Liver
KnowGID_001157	0.4371	Hippocampus
KnowGID_001158	0.4983	Hippocampus
KnowGID_001159	0.3701	Spleen
KnowGID_001160	NA	NA
KnowGID_001161	0.5296	Spleen
KnowGID_001162	0.8088	Hippocampus
KnowGID_001163	NA	NA
KnowGID_001164	0.2197	Thymus
KnowGID_001165	0.3179	Hippocampus
KnowGID_001166	0.5028	Hippocampus
KnowGID_001167	0.4056	Heart
KnowGID_001168	0.2878	Lung
KnowGID_001169	0.8523	Lung
KnowGID_001170	0.5802	Lung
KnowGID_001171	0.6375	Lung
KnowGID_001172	0.5721	Liver
KnowGID_001173	0.2727	Liver
KnowGID_001174	1.0000	Spleen
KnowGID_001175	0.6769	Spleen
KnowGID_001176	0.5526	Lung
KnowGID_001177	0.7298	Spleen
KnowGID_001178	0.4877	Thymus
KnowGID_001179	0.6177	Thymus
KnowGID_001180	0.6280	Spleen
KnowGID_001181	0.3263	Spleen
KnowGID_001182	0.3828	Spleen
KnowGID_001183	0.3166	Thymus
KnowGID_001184	0.5523	Lung
KnowGID_001185	0.5352	Thymus
KnowGID_001186	0.8598	Liver
KnowGID_001187	0.4521	Liver
KnowGID_001188	0.7141	Hippocampus
KnowGID_001189	0.4722	Hippocampus
KnowGID_001190	0.3038	Hippocampus
KnowGID_001191	0.4532	Spleen
KnowGID_001192	0.6592	Thymus
KnowGID_001193	0.4510	Spleen
KnowGID_001194	0.2776	Spleen
KnowGID_001195	0.5945	Liver
KnowGID_001196	0.8314	Hippocampus
KnowGID_001197	0.4030	Hippocampus
KnowGID_001198	0.4451	Thymus
KnowGID_001199	0.3279	Heart
KnowGID_001200	0.4842	Lung
KnowGID_001201	0.5286	Lung
KnowGID_001202	0.2899	Spleen
KnowGID_001203	0.3251	Spleen
KnowGID_001204	0.5941	Heart
KnowGID_001205	0.5091	Spleen
KnowGID_001206	0.4602	Spleen
KnowGID_001207	0.7096	Lung
KnowGID_001208	0.3027	Thymus
KnowGID_001209	0.4879	Thymus
KnowGID_001210	0.5934	Spleen
KnowGID_001211	0.5976	Spleen
KnowGID_001212	0.4788	Thymus
KnowGID_001213	0.4157	Spleen
KnowGID_001214	NA	NA
KnowGID_001215	1.0000	Spleen
KnowGID_001216	NA	NA
KnowGID_001217	0.5204	Spleen
KnowGID_001218	0.4193	Spleen
KnowGID_001219	0.3588	Lung
KnowGID_001220	0.4570	Spleen
KnowGID_001221	0.6095	Spleen
KnowGID_001222	0.4955	Hippocampus
KnowGID_001223	0.4408	Spleen
KnowGID_001224	0.3437	Hippocampus
KnowGID_001225	0.4186	Hippocampus
KnowGID_001226	0.6643	Spleen
KnowGID_001227	0.2406	Spleen
KnowGID_001228	0.4029	Thymus
KnowGID_001229	0.5450	Spleen
KnowGID_001230	0.3419	Thymus
KnowGID_001231	0.6951	Spleen
KnowGID_001232	0.6028	Hippocampus
KnowGID_001233	0.3280	Spleen
KnowGID_001234	0.5001	Hippocampus
KnowGID_001235	0.6659	Spleen
KnowGID_001236	0.6371	Spleen
KnowGID_001237	NA	NA
KnowGID_001238	0.3274	Thymus
KnowGID_001239	0.4929	Spleen
KnowGID_001240	0.4044	Hippocampus
KnowGID_001241	0.5793	Hippocampus
KnowGID_001242	0.4154	Spleen
KnowGID_001243	0.6092	Spleen
KnowGID_001244	0.2329	Spleen
KnowGID_001245	0.3485	Spleen
KnowGID_001246	0.4850	Thymus
KnowGID_001247	0.3371	Thymus
KnowGID_001248	0.3339	Hippocampus
KnowGID_001249	0.3673	Thymus
KnowGID_001250	0.6310	Hippocampus
KnowGID_001251	0.3264	Thymus
KnowGID_001252	0.3547	Thymus
KnowGID_001253	0.5422	Spleen
KnowGID_001254	0.7281	Spleen
KnowGID_001255	1.0000	Spleen
KnowGID_001256	0.4296	Spleen
KnowGID_001257	0.3706	Lung
KnowGID_001258	0.4346	Spleen
KnowGID_001259	0.2511	Spleen
KnowGID_001260	0.2350	Lung
KnowGID_001261	0.5757	Spleen
KnowGID_001262	NA	NA
KnowGID_001263	0.4506	Thymus
KnowGID_001264	0.8194	Liver
KnowGID_001265	0.6347	Thymus
KnowGID_001266	0.4135	Spleen
KnowGID_001267	0.3878	Liver
KnowGID_001268	NA	NA
KnowGID_001269	0.7005	Spleen
KnowGID_001270	0.4607	Spleen
KnowGID_001271	0.3054	Hippocampus
KnowGID_001272	NA	NA
KnowGID_001273	0.4552	Hippocampus
KnowGID_001274	0.7038	Hippocampus
KnowGID_001275	0.7782	Hippocampus
KnowGID_001276	NA	NA
KnowGID_001277	0.3461	Spleen
KnowGID_001278	0.4137	Liver
KnowGID_001279	1.0000	Heart
KnowGID_001280	1.0000	Heart
KnowGID_001281	0.7939	Heart
KnowGID_001282	0.6990	Spleen
KnowGID_001283	0.4258	Lung
KnowGID_001284	0.3481	Hippocampus
KnowGID_001285	0.3760	Hippocampus
KnowGID_001286	0.4699	Heart
KnowGID_001287	0.4707	Thymus
KnowGID_001288	0.5299	Thymus
KnowGID_001289	0.3827	Thymus
KnowGID_001290	0.5794	Hippocampus
KnowGID_001291	0.5035	Hippocampus
KnowGID_001292	1.0000	Lung
KnowGID_001293	0.5304	Spleen
KnowGID_001294	1.0000	Spleen
KnowGID_001295	0.4987	Spleen
KnowGID_001296	0.5204	Hippocampus
KnowGID_001297	0.5809	Spleen
KnowGID_001298	0.4508	Spleen
KnowGID_001299	0.4087	Liver
KnowGID_001300	0.8272	Thymus
KnowGID_001301	0.8007	Spleen
KnowGID_001302	0.4067	Spleen
KnowGID_001303	0.7601	Liver
KnowGID_001304	0.3866	Lung
KnowGID_001305	0.5592	Thymus
KnowGID_001306	0.7909	Hippocampus
KnowGID_001307	0.4692	Spleen
KnowGID_001308	0.4615	Spleen
KnowGID_001309	0.2426	Lung
KnowGID_001310	0.3985	Spleen
KnowGID_001311	0.3957	Spleen
KnowGID_001312	0.5261	Thymus
KnowGID_001313	0.7686	Spleen
KnowGID_001314	0.4688	Lung
KnowGID_001315	0.5406	Hippocampus
KnowGID_001316	NA	NA
KnowGID_001317	0.5834	Spleen
KnowGID_001318	0.4158	Liver
KnowGID_001319	0.5086	Lung
KnowGID_001320	NA	NA
KnowGID_001321	NA	NA
KnowGID_001322	0.5129	Spleen
KnowGID_001323	0.4772	Spleen
KnowGID_001324	0.2934	Thymus
KnowGID_001325	0.5193	Spleen
KnowGID_001326	0.6059	Lung
KnowGID_001327	0.8597	Lung
KnowGID_001328	0.8920	Lung
KnowGID_001329	0.9187	Lung
KnowGID_001330	1.0000	Lung
KnowGID_001331	0.7419	Lung
KnowGID_001332	0.8026	Lung
KnowGID_001333	0.8528	Spleen
KnowGID_001334	0.4568	Spleen
KnowGID_001335	0.6234	Spleen
KnowGID_001336	0.5505	Spleen
KnowGID_001337	0.5113	Spleen
KnowGID_001338	0.7669	Hippocampus
KnowGID_001339	0.4406	Spleen
KnowGID_001340	1.0000	Thymus
KnowGID_001341	0.8376	Hippocampus
KnowGID_001342	0.5189	Spleen
KnowGID_001343	0.5427	Liver
KnowGID_001344	0.3591	Heart
KnowGID_001345	0.6052	Thymus
KnowGID_001346	0.8525	Hippocampus
KnowGID_001347	0.3774	Spleen
KnowGID_001348	0.5464	Lung
KnowGID_001349	0.3127	Spleen
KnowGID_001350	0.3174	Lung
KnowGID_001351	NA	NA
KnowGID_001352	0.4806	Spleen
KnowGID_001353	0.2374	Lung
KnowGID_001354	0.3944	Spleen
KnowGID_001355	0.3008	Hippocampus
KnowGID_001356	0.3060	Lung
KnowGID_001357	0.3406	Lung
KnowGID_001358	0.3237	Spleen
KnowGID_001359	0.4334	Spleen
KnowGID_001360	0.7504	Spleen
KnowGID_001361	0.3970	Liver
KnowGID_001362	0.5066	Spleen
KnowGID_001363	0.5346	Lung
KnowGID_001364	0.4389	Heart
KnowGID_001365	0.3827	Spleen
KnowGID_001366	0.4991	Liver
KnowGID_001367	0.5107	Spleen
KnowGID_001368	0.4295	Spleen
KnowGID_001369	0.3721	Lung
KnowGID_001370	NA	NA
KnowGID_001371	0.3924	Spleen
KnowGID_001372	1.0000	Spleen
KnowGID_001373	0.6870	Spleen
KnowGID_001374	0.4951	Spleen
KnowGID_001375	0.3301	Spleen
KnowGID_001376	0.5081	Spleen
KnowGID_001377	0.3403	Thymus
KnowGID_001378	0.2103	Spleen
KnowGID_001379	0.5706	Lung
KnowGID_001380	0.5708	Spleen
KnowGID_001381	0.5498	Spleen
KnowGID_001382	0.5026	Spleen
KnowGID_001383	0.4993	Spleen
KnowGID_001384	0.2281	Hippocampus
KnowGID_001385	0.3860	Hippocampus
KnowGID_001386	0.6095	Hippocampus
KnowGID_001387	0.4907	Spleen
KnowGID_001388	0.2763	Spleen
KnowGID_001389	0.7163	Hippocampus
KnowGID_001390	0.4747	Spleen
KnowGID_001391	0.5226	Hippocampus
KnowGID_001392	0.5904	Spleen
KnowGID_001393	0.5290	Thymus
KnowGID_001394	0.7967	Thymus
KnowGID_001395	0.5652	Spleen
KnowGID_001397	0.2965	Spleen
KnowGID_001398	0.5896	Spleen
KnowGID_001399	0.7389	Heart
KnowGID_001400	0.4825	Spleen
KnowGID_001401	0.4201	Hippocampus
KnowGID_001402	0.3652	Liver
KnowGID_001403	0.5480	Spleen
KnowGID_001404	0.4922	Spleen
KnowGID_001405	0.5201	Spleen
KnowGID_001406	0.2439	Thymus
KnowGID_001407	0.6570	Lung
KnowGID_001408	0.3679	Thymus
KnowGID_001409	0.4420	Spleen
KnowGID_001410	0.3430	Spleen
KnowGID_001411	0.5123	Thymus
KnowGID_001412	0.2838	Thymus
KnowGID_001413	0.5768	Lung
KnowGID_001414	0.3129	Hippocampus
KnowGID_001415	0.5005	Spleen
KnowGID_001416	0.3712	Liver
KnowGID_001417	0.5053	Spleen
KnowGID_001418	1.0000	Spleen
KnowGID_001419	0.6332	Liver
KnowGID_001420	0.3934	Thymus
KnowGID_001421	1.0000	Thymus
KnowGID_001422	0.5080	Spleen
KnowGID_001423	0.5509	Lung
KnowGID_001424	0.5101	Spleen
KnowGID_001425	0.3560	Spleen
KnowGID_001426	0.4483	Spleen
KnowGID_001427	0.2180	Hippocampus
KnowGID_001428	0.3402	Spleen
KnowGID_001429	0.2523	Thymus
KnowGID_001430	0.4291	Spleen
KnowGID_001431	0.5705	Spleen
KnowGID_001432	0.3881	Spleen
KnowGID_001433	0.4746	Spleen
KnowGID_001434	0.3081	Hippocampus
KnowGID_001435	0.3526	Hippocampus
KnowGID_001436	0.3170	Hippocampus
KnowGID_001437	0.6124	Hippocampus
KnowGID_001438	0.5810	Thymus
KnowGID_001439	0.3354	Hippocampus
KnowGID_001440	0.5228	Lung
KnowGID_001441	1.0000	Liver
KnowGID_001442	0.6026	Hippocampus
KnowGID_001443	0.3952	Thymus
KnowGID_001444	0.5521	Spleen
KnowGID_001445	0.6884	Spleen
KnowGID_001446	0.5167	Spleen
KnowGID_001447	0.3678	Thymus
KnowGID_001448	0.4810	Thymus
KnowGID_001449	0.8197	Thymus
KnowGID_001450	0.4342	Thymus
KnowGID_001451	0.4207	Thymus
KnowGID_001452	0.4348	Spleen
KnowGID_001453	0.4715	Spleen
KnowGID_001454	0.3886	Spleen
KnowGID_001455	0.4454	Spleen
KnowGID_001456	0.5208	Hippocampus
KnowGID_001457	NA	NA
KnowGID_001458	0.5085	Spleen
KnowGID_001459	0.3471	Heart
KnowGID_001460	0.5869	Spleen
KnowGID_001461	0.6785	Spleen
KnowGID_001462	0.3819	Thymus
KnowGID_001463	1.0000	Spleen
KnowGID_001464	0.3824	Spleen
KnowGID_001465	0.5415	Hippocampus
KnowGID_001466	0.7035	Hippocampus
KnowGID_001467	0.5738	Thymus
KnowGID_001468	0.6054	Spleen
KnowGID_001469	0.5943	Thymus
KnowGID_001470	0.5122	Thymus
KnowGID_001471	0.4454	Spleen
KnowGID_001472	0.4261	Spleen
KnowGID_001473	1.0000	Thymus
KnowGID_001474	0.5234	Lung
KnowGID_001475	0.5506	Lung
KnowGID_001476	0.4653	Thymus
KnowGID_001477	1.0000	Thymus
KnowGID_001478	0.5936	Spleen
KnowGID_001479	0.5710	Spleen
KnowGID_001480	0.6947	Spleen
KnowGID_001481	0.4923	Spleen
KnowGID_001482	0.7326	Thymus
KnowGID_001483	NA	NA
KnowGID_001484	0.7932	Heart
KnowGID_001485	0.5087	Hippocampus
KnowGID_001486	0.8231	Hippocampus
KnowGID_001487	NA	NA
KnowGID_001488	1.0000	Thymus
KnowGID_001489	0.4545	Spleen
KnowGID_001490	0.2547	Lung
KnowGID_001491	0.2637	Heart
KnowGID_001492	0.3146	Thymus
KnowGID_001493	0.5971	Lung
KnowGID_001494	0.4744	Spleen
KnowGID_001495	1.0000	Spleen
KnowGID_001496	0.5158	Spleen
KnowGID_001497	1.0000	Thymus
KnowGID_001498	0.5700	Spleen
KnowGID_001499	0.6802	Hippocampus
KnowGID_001500	0.3416	Spleen
KnowGID_001501	0.4284	Spleen
KnowGID_001502	0.5448	Spleen
KnowGID_001503	0.5290	Spleen
KnowGID_001504	0.4175	Spleen
KnowGID_001505	0.4892	Spleen
KnowGID_001506	0.4076	Lung
KnowGID_001507	0.6497	Thymus
KnowGID_001508	0.4192	Spleen
KnowGID_001509	1.0000	Spleen
KnowGID_001510	0.6425	Spleen
KnowGID_001511	0.6988	Spleen
KnowGID_001512	1.0000	Spleen
KnowGID_001513	0.5890	Spleen
KnowGID_001514	0.6951	Spleen
KnowGID_001515	0.8537	Spleen
KnowGID_001516	1.0000	Spleen
KnowGID_001517	0.4922	Spleen
KnowGID_001518	0.2661	Lung
KnowGID_001519	0.3337	Lung
KnowGID_001520	0.4480	Spleen
KnowGID_001521	0.3756	Hippocampus
KnowGID_001522	0.3636	Spleen
KnowGID_001523	1.0000	Thymus
KnowGID_001524	0.4623	Spleen
KnowGID_001525	NA	NA
KnowGID_001526	0.6666	Spleen
KnowGID_001527	0.5835	Hippocampus
KnowGID_001528	0.4344	Spleen
KnowGID_001529	1.0000	Thymus
KnowGID_001530	0.4034	Hippocampus
KnowGID_001531	0.6790	Spleen
KnowGID_001532	0.7493	Spleen
KnowGID_001533	NA	NA
KnowGID_001534	0.5231	Spleen
KnowGID_001535	0.4830	Spleen
KnowGID_001536	0.6236	Spleen
KnowGID_001537	NA	NA
KnowGID_001538	0.4717	Spleen
KnowGID_001539	0.3474	Liver
KnowGID_001540	0.3387	Spleen
KnowGID_001541	0.4097	Lung
KnowGID_001542	0.4527	Hippocampus
KnowGID_001543	0.5696	Hippocampus
KnowGID_001544	0.3854	Spleen
KnowGID_001545	NA	NA
KnowGID_001546	0.6981	Lung
KnowGID_001547	0.3951	Lung
KnowGID_001548	0.4180	Spleen
KnowGID_001549	0.5654	Spleen
KnowGID_001550	0.6843	Hippocampus
KnowGID_001551	1.0000	Hippocampus
KnowGID_001552	NA	NA
KnowGID_001553	0.4509	Hippocampus
KnowGID_001554	0.8719	Hippocampus
KnowGID_001555	0.3499	Spleen
KnowGID_001556	0.2886	Hippocampus
KnowGID_001557	0.6699	Spleen
KnowGID_001558	1.0000	Spleen
KnowGID_001559	0.4492	Spleen
KnowGID_001560	0.2907	Spleen
KnowGID_001561	0.2954	Thymus
KnowGID_001562	0.4297	Spleen
KnowGID_001563	0.4414	Hippocampus
KnowGID_001564	0.5733	Hippocampus
KnowGID_001565	NA	NA
KnowGID_001566	1.0000	Spleen
KnowGID_001567	0.4852	Spleen
KnowGID_001568	0.5358	Liver
KnowGID_001569	0.2873	Lung
KnowGID_001570	0.3990	Hippocampus
KnowGID_001571	0.3080	Spleen
KnowGID_001572	0.5857	Spleen
KnowGID_001573	0.5798	Spleen
KnowGID_001574	0.6053	Spleen
KnowGID_001575	0.4231	Hippocampus
KnowGID_001576	0.3131	Hippocampus
KnowGID_001577	0.8240	Spleen
KnowGID_001578	0.4009	Hippocampus
KnowGID_001579	0.5694	Liver
KnowGID_001580	0.3275	Lung
KnowGID_001581	0.4197	Spleen
KnowGID_001582	0.3964	Spleen
KnowGID_001583	NA	NA
KnowGID_001584	0.8524	Heart
KnowGID_001585	0.3738	Spleen
KnowGID_001586	NA	NA
KnowGID_001587	0.5391	Thymus
KnowGID_001588	0.3387	Hippocampus
KnowGID_001589	0.5740	Spleen
KnowGID_001590	0.5048	Lung
KnowGID_001591	0.4669	Spleen
KnowGID_001592	NA	NA
KnowGID_001593	0.3202	Lung
KnowGID_001594	0.4669	Thymus
KnowGID_001595	0.3792	Spleen
KnowGID_001596	0.7720	Hippocampus
KnowGID_001597	0.3917	Lung
KnowGID_001598	0.5645	Thymus
KnowGID_001599	1.0000	Spleen
KnowGID_001600	0.7633	Heart
KnowGID_001601	0.5039	Thymus
KnowGID_001602	NA	NA
KnowGID_001603	0.4523	Spleen
KnowGID_001604	0.6495	Thymus
KnowGID_001605	0.3260	Thymus
KnowGID_001606	0.4625	Spleen
KnowGID_001607	0.4980	Thymus
KnowGID_001608	0.4598	Spleen
KnowGID_001609	0.8539	Hippocampus
KnowGID_001610	0.7005	Spleen
KnowGID_001611	0.6558	Spleen
KnowGID_001612	0.6785	Spleen
KnowGID_001613	1.0000	Spleen
KnowGID_001614	1.0000	Lung
KnowGID_001615	0.6531	Spleen
KnowGID_001616	0.3445	Lung
KnowGID_001617	1.0000	Spleen
KnowGID_001618	NA	NA
KnowGID_001619	1.0000	Spleen
KnowGID_001620	0.5563	Hippocampus
KnowGID_001621	0.2785	Hippocampus
KnowGID_001622	0.5090	Spleen
KnowGID_001623	0.6035	Spleen
KnowGID_001624	0.3134	Heart
KnowGID_001625	0.4797	Thymus
KnowGID_001626	0.6759	Spleen
KnowGID_001627	0.2759	Liver
KnowGID_001628	0.3446	Thymus
KnowGID_001629	0.3922	Hippocampus
KnowGID_001630	0.9270	Hippocampus
KnowGID_001631	0.7661	Hippocampus
KnowGID_001632	0.5175	Hippocampus
KnowGID_001633	0.5858	Hippocampus
KnowGID_001634	0.6096	Lung
KnowGID_001635	0.3573	Thymus
KnowGID_001636	0.2929	Thymus
KnowGID_001637	0.6580	Spleen
KnowGID_001638	0.3698	Hippocampus
KnowGID_001639	NA	NA
KnowGID_001640	0.4180	Spleen
KnowGID_001641	0.3058	Spleen
KnowGID_001642	0.2579	Lung
KnowGID_001643	0.4404	Spleen
KnowGID_001644	0.3111	Lung
KnowGID_001645	0.5329	Liver
KnowGID_001646	0.5849	Heart
KnowGID_001647	0.6275	Liver
KnowGID_001648	0.4534	Spleen
KnowGID_001649	0.6268	Spleen
KnowGID_001650	0.4044	Thymus
KnowGID_001651	0.4112	Thymus
KnowGID_001652	0.4422	Thymus
KnowGID_001653	NA	NA
KnowGID_001654	0.3407	Hippocampus
KnowGID_001655	0.5063	Spleen
KnowGID_001656	0.4594	Spleen
KnowGID_001657	0.6398	Spleen
KnowGID_001658	0.3776	Thymus
KnowGID_001659	0.4262	Spleen
KnowGID_001660	0.4001	Spleen
KnowGID_001661	NA	NA
KnowGID_001662	1.0000	Lung
KnowGID_001663	0.5613	Spleen
KnowGID_001664	0.3708	Hippocampus
KnowGID_001665	0.4782	Lung
KnowGID_001666	0.4385	Lung
KnowGID_001667	0.5027	Liver
KnowGID_001668	0.4620	Spleen
KnowGID_001669	0.4567	Thymus
KnowGID_001670	0.5952	Spleen
KnowGID_001671	0.7424	Spleen
KnowGID_001672	NA	NA
KnowGID_001673	0.4722	Spleen
KnowGID_001674	0.5513	Spleen
KnowGID_001675	0.6981	Spleen
KnowGID_001676	0.4330	Thymus
KnowGID_001677	0.3574	Thymus
KnowGID_001678	0.4915	Spleen
KnowGID_001679	0.4029	Hippocampus
KnowGID_001680	0.5607	Spleen
KnowGID_001681	0.6909	Hippocampus
KnowGID_001682	0.3121	Thymus
KnowGID_001683	0.3626	Thymus
KnowGID_001684	0.2861	Thymus
KnowGID_001685	1.0000	Spleen
KnowGID_001686	1.0000	Thymus
KnowGID_001687	0.4400	Hippocampus
KnowGID_001688	0.4722	Spleen
KnowGID_001689	0.4636	Spleen
KnowGID_001690	0.6553	Hippocampus
KnowGID_001691	0.3070	Spleen
KnowGID_001692	0.4666	Spleen
KnowGID_001693	0.6118	Spleen
KnowGID_001694	0.7769	Spleen
KnowGID_001695	0.3148	Thymus
KnowGID_001696	1.0000	Hippocampus
KnowGID_001697	1.0000	Spleen
KnowGID_001698	0.7726	Heart
KnowGID_001699	0.7159	Spleen
KnowGID_001700	0.3308	Spleen
KnowGID_001701	1.0000	Lung
KnowGID_001702	0.5211	Spleen
KnowGID_001703	0.4617	Heart
KnowGID_001704	0.4347	Heart
KnowGID_001705	0.6171	Spleen
KnowGID_001706	0.5147	Spleen
KnowGID_001707	0.3374	Spleen
KnowGID_001708	NA	NA
KnowGID_001709	0.5954	Spleen
KnowGID_001710	0.3605	Spleen
KnowGID_001711	0.2801	Thymus
KnowGID_001712	0.3218	Spleen
KnowGID_001713	0.2989	Thymus
KnowGID_001714	0.2691	Spleen
KnowGID_001715	0.2701	Thymus
KnowGID_001716	0.3683	Thymus
KnowGID_001717	0.4411	Thymus
KnowGID_001718	0.5259	Spleen
KnowGID_001719	NA	NA
KnowGID_001720	0.6612	Spleen
KnowGID_001721	0.3415	Thymus
KnowGID_001722	0.6089	Spleen
KnowGID_001723	0.3797	Spleen
KnowGID_001724	NA	NA
KnowGID_001725	NA	NA
KnowGID_001726	NA	NA
KnowGID_001727	1.0000	Thymus
KnowGID_001728	NA	NA
KnowGID_001729	0.6531	Spleen
KnowGID_001730	0.5543	Spleen
KnowGID_001731	0.4443	Spleen
KnowGID_001732	0.2655	Thymus
KnowGID_001733	0.3215	Spleen
KnowGID_001734	0.2644	Thymus
KnowGID_001735	0.3577	Spleen
KnowGID_001736	0.4305	Spleen
KnowGID_001737	0.5505	Hippocampus
KnowGID_001738	0.6928	Spleen
KnowGID_001739	1.0000	Spleen
KnowGID_001740	0.5654	Spleen
KnowGID_001741	0.6123	Spleen
KnowGID_001742	0.4692	Spleen
KnowGID_001743	NA	NA
KnowGID_001744	NA	NA
KnowGID_001745	0.5178	Heart
KnowGID_001746	0.3172	Thymus
KnowGID_001747	0.2390	Thymus
KnowGID_001748	0.3492	Thymus
KnowGID_001749	0.2640	Thymus
KnowGID_001750	0.2841	Hippocampus
KnowGID_001751	NA	NA
KnowGID_001752	0.4868	Hippocampus
KnowGID_001753	0.3879	Hippocampus
KnowGID_001754	0.3390	Spleen
KnowGID_001755	0.4713	Spleen
KnowGID_001756	0.4207	Spleen
KnowGID_001757	0.7386	Hippocampus
KnowGID_001758	0.8341	Hippocampus
KnowGID_001759	0.6752	Hippocampus
KnowGID_001760	1.0000	Hippocampus
KnowGID_001761	0.3802	Hippocampus
KnowGID_001762	0.3059	Hippocampus
KnowGID_001763	0.5227	Spleen
KnowGID_001764	0.6268	Spleen
KnowGID_001765	0.4453	Hippocampus
KnowGID_001766	0.5865	Spleen
KnowGID_001767	0.4305	Spleen
KnowGID_001768	0.3388	Spleen
KnowGID_001769	0.6480	Lung
KnowGID_001770	0.4179	Spleen
KnowGID_001771	0.4999	Heart
KnowGID_001772	0.4529	Hippocampus
KnowGID_001773	0.5487	Spleen
KnowGID_001774	0.6539	Hippocampus
KnowGID_001775	0.4707	Spleen
KnowGID_001776	NA	NA
KnowGID_001777	0.4951	Spleen
KnowGID_001778	NA	NA
KnowGID_001779	0.5454	Thymus
KnowGID_001780	0.7112	Thymus
KnowGID_001781	0.3881	Spleen
KnowGID_001782	0.4284	Spleen
KnowGID_001783	0.3695	Thymus
KnowGID_001784	0.6242	Heart
KnowGID_001785	1.0000	Spleen
KnowGID_001786	0.7171	Thymus
KnowGID_001787	0.7251	Thymus
KnowGID_001788	0.4211	Thymus
KnowGID_001789	0.5704	Spleen
KnowGID_001790	0.3589	Spleen
KnowGID_001791	0.3877	Thymus
KnowGID_001792	0.6025	Spleen
KnowGID_001793	0.6060	Spleen
KnowGID_001794	0.7599	Thymus
KnowGID_001795	0.5049	Spleen
KnowGID_001796	0.2682	Spleen
KnowGID_001797	0.3131	Thymus
KnowGID_001798	0.3844	Thymus
KnowGID_001799	0.5719	Hippocampus
KnowGID_001800	0.3549	Thymus
KnowGID_001801	1.0000	Thymus
KnowGID_001802	0.6739	Spleen
KnowGID_001803	0.6114	Thymus
KnowGID_001804	0.5796	Thymus
KnowGID_001805	0.3069	Heart
KnowGID_001806	0.2097	Spleen
KnowGID_001807	0.5934	Spleen
KnowGID_001808	0.3767	Spleen
KnowGID_001809	0.5060	Thymus
KnowGID_001810	0.3699	Spleen
KnowGID_001811	0.3379	Thymus
KnowGID_001812	NA	NA
KnowGID_001813	0.2869	Lung
KnowGID_001814	1.0000	Lung
KnowGID_001815	0.5544	Spleen
KnowGID_001816	0.3132	Hippocampus
KnowGID_001817	0.4498	Spleen
KnowGID_001818	0.6403	Lung
KnowGID_001819	1.0000	Thymus
KnowGID_001820	NA	NA
KnowGID_001821	NA	NA
KnowGID_001822	NA	NA
KnowGID_001823	NA	NA
KnowGID_001824	NA	NA
KnowGID_001825	0.4040	Hippocampus
KnowGID_001826	0.3677	Lung
KnowGID_001827	0.3482	Heart
KnowGID_001828	0.6105	Spleen
KnowGID_001829	0.3985	Spleen
KnowGID_001830	0.2911	Heart
KnowGID_001831	0.5281	Thymus
KnowGID_001832	0.3970	Spleen
KnowGID_001833	0.2320	Lung
KnowGID_001834	0.3737	Spleen
KnowGID_001835	0.5531	Lung
KnowGID_001836	0.5304	Lung
KnowGID_001837	0.6288	Spleen
KnowGID_001838	0.5162	Spleen
KnowGID_001839	0.2436	Spleen
KnowGID_001840	0.4083	Hippocampus
KnowGID_001841	0.4511	Thymus
KnowGID_001842	0.5525	Spleen
KnowGID_001843	0.3462	Spleen
KnowGID_001844	0.4374	Hippocampus
KnowGID_001845	0.2753	Spleen
KnowGID_001846	0.3050	Lung
KnowGID_001847	0.4699	Spleen
KnowGID_001848	0.4634	Heart
KnowGID_001849	0.3260	Thymus
KnowGID_001850	0.2693	Spleen
KnowGID_001851	0.3271	Lung
KnowGID_001852	0.2841	Thymus
KnowGID_001853	0.7505	Heart
KnowGID_001854	0.6005	Liver
KnowGID_001855	0.4645	Thymus
KnowGID_001856	1.0000	Spleen
KnowGID_001857	1.0000	Spleen
KnowGID_001858	NA	NA
KnowGID_001859	0.3652	Liver
KnowGID_001860	0.7360	Hippocampus
KnowGID_001861	0.5771	Hippocampus
KnowGID_001862	0.3469	Lung
KnowGID_001863	0.5978	Spleen
KnowGID_001864	0.3617	Spleen
KnowGID_001865	0.5435	Spleen
KnowGID_001866	0.5218	Lung
KnowGID_001867	0.2815	Thymus
KnowGID_001868	0.6725	Lung
KnowGID_001869	0.5921	Thymus
KnowGID_001870	0.5781	Spleen
KnowGID_001871	0.5774	Spleen
KnowGID_001872	0.4259	Spleen
KnowGID_001873	0.4932	Spleen
KnowGID_001874	0.5233	Spleen
KnowGID_001875	0.4222	Spleen
KnowGID_001876	1.0000	Spleen
KnowGID_001877	0.6019	Spleen
KnowGID_001878	0.5992	Spleen
KnowGID_001879	0.3602	Hippocampus
KnowGID_001880	0.3885	Spleen
KnowGID_001881	NA	NA
KnowGID_001882	0.2939	Heart
KnowGID_001883	0.3119	Spleen
KnowGID_001884	0.8152	Hippocampus
KnowGID_001885	1.0000	Lung
KnowGID_001886	0.5440	Spleen
KnowGID_001887	0.3744	Heart
KnowGID_001888	0.6392	Spleen
KnowGID_001889	0.5208	Spleen
KnowGID_001890	0.6421	Heart
KnowGID_001891	0.5252	Hippocampus
KnowGID_001892	0.6271	Hippocampus
KnowGID_001893	0.5091	Hippocampus
KnowGID_001894	0.6996	Hippocampus
KnowGID_001895	0.7111	Hippocampus
KnowGID_001896	0.5014	Spleen
KnowGID_001897	0.7305	Hippocampus
KnowGID_001898	0.7208	Hippocampus
KnowGID_001899	0.7257	Hippocampus
KnowGID_001900	0.5221	Hippocampus
KnowGID_001901	0.4447	Thymus
KnowGID_001902	0.4157	Spleen
KnowGID_001903	0.6316	Spleen
KnowGID_001904	0.5279	Spleen
KnowGID_001905	0.4082	Spleen
KnowGID_001906	0.2321	Liver
KnowGID_001907	0.3995	Spleen
KnowGID_001908	0.5585	Spleen
KnowGID_001909	0.5580	Spleen
KnowGID_001910	1.0000	Thymus
KnowGID_001911	1.0000	Spleen
KnowGID_001912	0.3543	Hippocampus
KnowGID_001913	0.4568	Spleen
KnowGID_001914	NA	NA
KnowGID_001915	0.3774	Thymus
KnowGID_001916	0.3442	Spleen
KnowGID_001917	0.4769	Hippocampus
KnowGID_001918	NA	NA
KnowGID_001919	0.6054	Spleen
KnowGID_001920	0.4878	Spleen
KnowGID_001921	0.5199	Spleen
KnowGID_001922	1.0000	Thymus
KnowGID_001923	0.6574	Hippocampus
KnowGID_001924	0.5100	Thymus
KnowGID_001925	0.3543	Lung
KnowGID_001926	0.6786	Spleen
KnowGID_001927	0.5789	Spleen
KnowGID_001928	0.4767	Thymus
KnowGID_001929	0.4599	Spleen
KnowGID_001930	0.7302	Spleen
KnowGID_001931	0.5404	Spleen
KnowGID_001932	1.0000	Spleen
KnowGID_001933	0.4034	Spleen
KnowGID_001934	0.6349	Spleen
KnowGID_001935	0.4316	Hippocampus
KnowGID_001936	0.5836	Spleen
KnowGID_001937	0.4999	Heart
KnowGID_001938	0.6282	Hippocampus
KnowGID_001939	0.4905	Spleen
KnowGID_001940	0.4509	Spleen
KnowGID_001941	0.6304	Hippocampus
KnowGID_001942	0.5810	Spleen
KnowGID_001943	1.0000	Spleen
KnowGID_001944	0.2929	Spleen
KnowGID_001945	0.3245	Heart
KnowGID_001946	0.3059	Spleen
KnowGID_001947	0.3706	Spleen
KnowGID_001948	0.3792	Lung
KnowGID_001949	0.6496	Spleen
KnowGID_001950	0.6087	Thymus
KnowGID_001951	0.5408	Hippocampus
KnowGID_001952	0.4372	Lung
KnowGID_001953	0.6550	Spleen
KnowGID_001954	0.4188	Spleen
KnowGID_001955	0.6902	Spleen
KnowGID_001956	1.0000	Spleen
KnowGID_001957	NA	NA
KnowGID_001958	0.5963	Spleen
KnowGID_001959	NA	NA
KnowGID_001960	1.0000	Hippocampus
KnowGID_001961	0.3806	Lung
KnowGID_001962	0.5068	Hippocampus
KnowGID_001963	1.0000	Spleen
KnowGID_001964	0.3628	Spleen
KnowGID_001965	NA	NA
KnowGID_001966	0.5244	Spleen
KnowGID_001967	0.3973	Spleen
KnowGID_001968	NA	NA
KnowGID_001969	0.5722	Spleen
KnowGID_001970	1.0000	Thymus
KnowGID_001971	0.4167	Lung
KnowGID_001972	0.4633	Spleen
KnowGID_001973	0.3980	Spleen
KnowGID_001974	0.5070	Spleen
KnowGID_001975	0.5210	Spleen
KnowGID_001976	0.6083	Spleen
KnowGID_001977	0.5553	Spleen
KnowGID_001978	0.3061	Hippocampus
KnowGID_001979	0.4857	Lung
KnowGID_001980	0.4390	Spleen
KnowGID_001981	0.5295	Hippocampus
KnowGID_001982	0.2699	Hippocampus
KnowGID_001983	0.4365	Thymus
KnowGID_001984	0.5495	Heart
KnowGID_001985	0.2519	Lung
KnowGID_001986	0.4670	Spleen
KnowGID_001987	0.6521	Spleen
KnowGID_001988	0.3969	Lung
KnowGID_001989	0.2951	Thymus
KnowGID_001990	0.3383	Spleen
KnowGID_001991	0.3176	Lung
KnowGID_001992	1.0000	Spleen
KnowGID_001993	1.0000	Spleen
KnowGID_001994	0.4467	Hippocampus
KnowGID_001995	0.3133	Liver
KnowGID_001996	0.8524	Liver
KnowGID_001997	0.2877	Spleen
KnowGID_001998	0.3370	Hippocampus
KnowGID_001999	1.0000	Spleen
KnowGID_002000	0.5618	Spleen
KnowGID_002001	0.3689	Spleen
[truncated: 8,571 more rows]
