# Supplementary material for: Comprehensive Characterization of 10,571 Mouse Large Intergenic Noncoding RNAs from Whole Transcriptome Sequencing
Source: PLoS One. 2013 Aug 12;8(8):e70835. doi: 10.1371/journal.pone.0070835 (PMC3741367; doi:10.1371/journal.pone.0070835)
Supplement: Dataset S3 — The list of JS scores of protein-coding genes. (XLS) [file pone.0070835.s011.xls]

NM_001001130	0.2679	Thymus
NM_001001144	0.2091	Hippocampus
NM_001001152	0.3264	Hippocampus
NM_001001160	0.8860	Hippocampus
NM_001001176	0.2504	Lung
NM_001001177	0.4256	Spleen
NM_001001178	0.3903	Hippocampus
NM_001001179	0.3184	Hippocampus
NM_001001180	0.6119	Hippocampus
NM_001001181	0.2054	Hippocampus
NM_001001182	0.2427	Lung
NM_001001183	0.3008	Lung
NM_001001184	0.2715	Thymus
NM_001001185	0.3052	Hippocampus
NM_001001186	0.3279	Spleen
NM_001001187	0.2539	Thymus
NM_001001295	0.2386	Heart
NM_001001297	0.5148	Hippocampus
NM_001001309	0.4116	Lung
NM_001001319	0.4119	Spleen
NM_001001320	0.5093	Spleen
NM_001001321	0.3731	Liver
NM_001001322	0.5450	Liver
NM_001001326	0.2591	Lung
NM_001001327	0.2760	Spleen
NM_001001332	NA	NA
NM_001001333	0.2202	Hippocampus
NM_001001334	0.6382	Hippocampus
NM_001001335	0.3856	Liver
NM_001001444	NA	NA
NM_001001445	0.2872	Heart
NM_001001446	0.7056	Liver
NM_001001447	0.2209	Spleen
NM_001001449	NA	NA
NM_001001450	1.0000	Thymus
NM_001001451	0.3987	Spleen
NM_001001452	0.3614	Spleen
NM_001001453	0.5703	Spleen
NM_001001454	0.7514	Hippocampus
NM_001001488	0.3436	Liver
NM_001001489	0.4530	Lung
NM_001001490	0.4812	Hippocampus
NM_001001491	0.2447	Lung
NM_001001492	0.3497	Lung
NM_001001493	0.2029	Spleen
NM_001001495	0.3420	Thymus
NM_001001496	0.3061	Spleen
NM_001001559	0.6277	Spleen
NM_001001565	0.4216	Hippocampus
NM_001001566	0.2724	Hippocampus
NM_001001602	0.3178	Lung
NM_001001650	0.6179	Spleen
NM_001001714	0.4709	Thymus
NM_001001735	0.2349	Thymus
NM_001001738	0.2877	Thymus
NM_001001792	0.5195	Hippocampus
NM_001001796	0.4738	Spleen
NM_001001798	0.2603	Liver
NM_001001803	NA	NA
NM_001001804	0.5648	Hippocampus
NM_001001805	0.5231	Spleen
NM_001001806	0.2445	Spleen
NM_001001807	0.4524	Thymus
NM_001001808	0.7272	Spleen
NM_001001809	NA	NA
NM_001001810	0.5189	Spleen
NM_001001880	0.3409	Hippocampus
NM_001001881	0.2378	Lung
NM_001001882	0.2840	Spleen
NM_001001883	0.3747	Lung
NM_001001884	0.3041	Thymus
NM_001001885	0.5206	Hippocampus
NM_001001892	0.2305	Spleen
NM_001001932	0.2279	Lung
NM_001001979	0.7002	Hippocampus
NM_001001980	0.3278	Lung
NM_001001981	0.2712	Hippocampus
NM_001001982	0.3744	Lung
NM_001001983	0.2436	Hippocampus
NM_001001984	0.2203	Thymus
NM_001001985	0.5548	Hippocampus
NM_001001986	0.3175	Hippocampus
NM_001001999	0.6507	Hippocampus
NM_001002004	0.2092	Heart
NM_001002005	0.7559	Hippocampus
NM_001002008	0.2467	Lung
NM_001002011	0.2743	Lung
NM_001002012	0.3617	Hippocampus
NM_001002238	0.4461	Hippocampus
NM_001002239	0.2258	Spleen
NM_001002240	0.6100	Thymus
NM_001002241	0.8217	Hippocampus
NM_001002267	0.4279	Hippocampus
NM_001002268	0.4650	Lung
NM_001002272	0.6495	Hippocampus
NM_001002764	0.2239	Thymus
NM_001002786	0.4617	Lung
NM_001002787	0.3935	Spleen
NM_001002791	0.5601	Spleen
NM_001002842	0.4156	Spleen
NM_001002846	0.3024	Thymus
NM_001002894	0.3969	Spleen
NM_001002895	0.2278	Hippocampus
NM_001002896	0.4382	Spleen
NM_001002897	0.2989	Hippocampus
NM_001002898	0.4491	Spleen
NM_001002900	0.5807	Liver
NM_001002927	0.3434	Hippocampus
NM_001002929	0.2315	Thymus
NM_001003393	1.0000	Thymus
NM_001003405	0.5032	Spleen
NM_001003664	NA	NA
NM_001003666	0.2383	Liver
NM_001003667	0.4609	Hippocampus
NM_001003668	0.3450	Hippocampus
NM_001003670	0.4501	Spleen
NM_001003671	0.6178	Hippocampus
NM_001003672	0.4460	Hippocampus
NM_001003685	0.3844	Spleen
NM_001003717	0.2616	Thymus
NM_001003719	0.3333	Hippocampus
NM_001003815	0.3359	Hippocampus
NM_001003817	0.3779	Lung
NM_001003824	0.7431	Hippocampus
NM_001003825	0.9442	Hippocampus
NM_001003893	0.7351	Liver
NM_001003898	0.2900	Thymus
NM_001003899	0.2911	Thymus
NM_001003908	0.2141	Hippocampus
NM_001003909	0.2097	Thymus
NM_001003910	0.2454	Lung
NM_001003911	0.3866	Heart
NM_001003912	0.2250	Hippocampus
NM_001003913	0.2249	Thymus
NM_001003915	0.4018	Lung
NM_001003916	0.2770	Hippocampus
NM_001003917	0.2277	Hippocampus
NM_001003918	0.2326	Thymus
NM_001003919	0.3443	Thymus
NM_001003920	0.6189	Hippocampus
NM_001003933	0.3259	Thymus
NM_001003934	0.6626	Hippocampus
NM_001003939	0.3038	Spleen
NM_001003947	0.9029	Hippocampus
NM_001003948	0.2886	Liver
NM_001003949	0.2084	Heart
NM_001003950	0.2355	Heart
NM_001003951	0.4298	Hippocampus
NM_001003952	NA	NA
NM_001003953	0.3140	Thymus
NM_001003955	0.3183	Heart
NM_001003960	0.3654	Spleen
NM_001003961	0.3549	Spleen
NM_001003963	0.3259	Thymus
NM_001003971	0.3132	Thymus
NM_001003972	0.2826	Thymus
NM_001003973	0.2515	Thymus
NM_001004025	0.3569	Spleen
NM_001004061	0.5107	Thymus
NM_001004062	0.3434	Hippocampus
NM_001004066	0.4101	Spleen
NM_001004139	0.2401	Lung
NM_001004140	0.4638	Thymus
NM_001004141	0.4247	Thymus
NM_001004142	0.3932	Spleen
NM_001004143	0.2537	Hippocampus
NM_001004144	0.2727	Hippocampus
NM_001004145	NA	NA
NM_001004147	0.9027	Hippocampus
NM_001004148	0.4742	Hippocampus
NM_001004149	0.3377	Lung
NM_001004150	0.4450	Spleen
NM_001004151	0.5488	Hippocampus
NM_001004152	0.6243	Thymus
NM_001004153	0.3746	Lung
NM_001004154	0.4388	Hippocampus
NM_001004155	0.3826	Thymus
NM_001004156	0.3190	Hippocampus
NM_001004157	0.2942	Lung
NM_001004158	0.4782	Thymus
NM_001004159	0.6369	Spleen
NM_001004164	0.2264	Hippocampus
NM_001004173	0.4474	Lung
NM_001004174	0.6331	Thymus
NM_001004176	0.3231	Lung
NM_001004177	0.3114	Thymus
NM_001004178	0.2531	Liver
NM_001004180	0.2408	Lung
NM_001004182	0.7750	Hippocampus
NM_001004184	0.2770	Liver
NM_001004185	0.2253	Liver
NM_001004187	0.3924	Thymus
NM_001004190	0.2427	Thymus
NM_001004191	0.2627	Liver
NM_001004192	0.4687	Thymus
NM_001004193	0.3227	Spleen
NM_001004194	0.6427	Spleen
NM_001004293	0.3451	Hippocampus
NM_001004357	0.9239	Hippocampus
NM_001004359	0.3765	Hippocampus
NM_001004361	0.2673	Hippocampus
NM_001004362	0.2122	Thymus
NM_001004363	0.2907	Hippocampus
NM_001004364	0.2586	Lung
NM_001004365	0.4142	Hippocampus
NM_001004366	0.3492	Lung
NM_001004367	0.5478	Hippocampus
NM_001004435	0.5170	Heart
NM_001004436	0.2360	Thymus
NM_001004455	0.4303	Lung
NM_001004468	0.4621	Heart
NM_001004721	0.1992	Lung
NM_001004761	0.8799	Hippocampus
NM_001004762	0.4143	Thymus
NM_001005223	0.2255	Hippocampus
NM_001005225	0.4606	Lung
NM_001005227	1.0000	Lung
NM_001005230	NA	NA
NM_001005232	0.5706	Spleen
NM_001005247	0.2522	Spleen
NM_001005248	0.2443	Thymus
NM_001005331	0.2091	Lung
NM_001005341	0.2342	Thymus
NM_001005342	0.4528	Hippocampus
NM_001005343	0.9045	Hippocampus
NM_001005358	0.2228	Liver
NM_001005370	0.3869	Hippocampus
NM_001005371	0.5170	Lung
NM_001005385	0.3638	Hippocampus
NM_001005419	0.2267	Hippocampus
NM_001005420	0.3589	Hippocampus
NM_001005421	0.3211	Spleen
NM_001005422	0.7561	Lung
NM_001005423	0.2599	Thymus
NM_001005424	0.6688	Hippocampus
NM_001005425	0.7259	Lung
NM_001005426	0.2983	Thymus
NM_001005475	0.3466	Hippocampus
NM_001005477	0.4115	Spleen
NM_001005481	NA	NA
NM_001005485	0.5306	Thymus
NM_001005488	0.6058	Spleen
NM_001005506	0.2592	Lung
NM_001005507	0.2506	Thymus
NM_001005508	0.3263	Thymus
NM_001005509	0.2107	Thymus
NM_001005510	0.3551	Lung
NM_001005511	0.8556	Hippocampus
NM_001005520	0.5902	Spleen
NM_001005523	0.2752	Thymus
NM_001005524	0.5922	Thymus
NM_001005525	0.2186	Thymus
NM_001005568	0.4666	Spleen
NM_001005569	1.0000	Thymus
NM_001005570	0.5300	Spleen
NM_001005605	0.2600	Lung
NM_001005608	0.3443	Thymus
NM_001005740	0.4026	Lung
NM_001005748	0.6356	Hippocampus
NM_001005767	0.2037	Heart
NM_001005784	0.3627	Thymus
NM_001005787	0.4461	Thymus
NM_001005788	0.2745	Lung
NM_001005846	0.4441	Spleen
NM_001005847	0.2239	Lung
NM_001005854	0.2745	Liver
NM_001005858	0.2673	Lung
NM_001005859	0.2688	Spleen
NM_001005860	0.7767	Spleen
NM_001005863	0.3811	Liver
NM_001005864	0.3572	Liver
NM_001005865	0.2920	Lung
NM_001005866	0.2552	Hippocampus
NM_001005867	0.2606	Spleen
NM_001005868	0.2348	Thymus
NM_001005916	0.2618	Thymus
NM_001006664	0.5410	Hippocampus
NM_001006668	0.9317	Hippocampus
NM_001006669	0.9557	Hippocampus
NM_001006674	0.9008	Hippocampus
NM_001006675	0.9588	Hippocampus
NM_001006676	0.9933	Hippocampus
NM_001006677	0.9953	Hippocampus
NM_001006678	0.4988	Hippocampus
NM_001006679	0.8223	Hippocampus
NM_001006680	0.9306	Hippocampus
NM_001007077	0.7565	Thymus
NM_001007154	0.8377	Hippocampus
NM_001007220	0.6897	Hippocampus
NM_001007221	0.5283	Heart
NM_001007222	0.6932	Spleen
NM_001007266	0.5434	Spleen
NM_001007268	0.2711	Spleen
NM_001007460	0.4850	Hippocampus
NM_001007461	0.7245	Thymus
NM_001007462	0.3353	Thymus
NM_001007463	0.5095	Lung
NM_001007465	0.2473	Liver
NM_001007472	0.4110	Spleen
NM_001007567	0.2402	Thymus
NM_001007568	0.2618	Hippocampus
NM_001007569	0.8766	Hippocampus
NM_001007570	0.2535	Heart
NM_001007571	0.2022	Thymus
NM_001007572	0.4463	Spleen
NM_001007573	0.6609	Hippocampus
NM_001007574	0.4334	Hippocampus
NM_001007575	0.2441	Thymus
NM_001007576	0.7120	Hippocampus
NM_001007577	0.3189	Thymus
NM_001007578	0.2717	Lung
NM_001007579	0.4132	Spleen
NM_001007580	0.3886	Spleen
NM_001007581	0.2117	Lung
NM_001007582	0.6004	Thymus
NM_001007583	0.3905	Heart
NM_001007584	0.4696	Spleen
NM_001007589	0.2093	Thymus
NM_001007596	0.4973	Hippocampus
NM_001008230	0.4621	Hippocampus
NM_001008231	0.3121	Hippocampus
NM_001008232	0.2832	Heart
NM_001008233	0.3185	Thymus
NM_001008238	0.2458	Lung
NM_001008419	0.6642	Thymus
NM_001008420	0.8647	Hippocampus
NM_001008421	0.2264	Thymus
NM_001008422	0.2307	Hippocampus
NM_001008423	0.8037	Hippocampus
NM_001008424	0.3055	Lung
NM_001008425	0.2700	Thymus
NM_001008426	0.3103	Lung
NM_001008427	0.2249	Lung
NM_001008428	0.5598	Spleen
NM_001008429	0.4067	Spleen
NM_001008497	0.3519	Spleen
NM_001008498	0.2595	Hippocampus
NM_001008499	0.5487	Heart
NM_001008501	0.2399	Spleen
NM_001008502	0.2619	Thymus
NM_001008506	0.2267	Hippocampus
NM_001008533	0.5028	Hippocampus
NM_001008542	0.2942	Hippocampus
NM_001008543	0.3538	Liver
NM_001008545	0.3505	Thymus
NM_001008546	0.4316	Thymus
NM_001008547	0.3107	Lung
NM_001008548	0.7205	Hippocampus
NM_001008549	0.2811	Spleen
NM_001008550	0.2189	Spleen
NM_001008551	NA	NA
NM_001008700	0.2616	Thymus
NM_001008702	0.3756	Liver
NM_001008705	0.2184	Thymus
NM_001008706	0.4213	Thymus
NM_001008785	0.3146	Thymus
NM_001008791	0.3327	Heart
NM_001008792	0.4337	Thymus
NM_001008793	0.3794	Thymus
NM_001008794	0.4551	Heart
NM_001008795	0.3788	Spleen
NM_001008796	0.3462	Spleen
NM_001008797	0.4527	Thymus
NM_001008798	0.5297	Thymus
NM_001008973	0.6284	Lung
NM_001009544	0.4541	Spleen
NM_001009545	0.5072	Spleen
NM_001009546	0.4436	Thymus
NM_001009547	0.6433	Spleen
NM_001009548	0.6768	Spleen
NM_001009549	0.3347	Spleen
NM_001009550	0.8395	Liver
NM_001009573	0.3258	Lung
NM_001009574	0.4950	Spleen
NM_001009575	0.2720	Hippocampus
NM_001009818	0.2299	Thymus
NM_001009819	0.3350	Thymus
NM_001009927	0.2652	Heart
NM_001009929	0.8942	Hippocampus
NM_001009930	0.8495	Hippocampus
NM_001009935	0.2386	Lung
NM_001009940	0.3742	Spleen
NM_001009947	0.3198	Thymus
NM_001009948	0.7531	Hippocampus
NM_001009949	0.2055	Lung
NM_001009950	0.5935	Spleen
NM_001009951	0.2351	Thymus
NM_001009952	0.5300	Spleen
NM_001009978	0.3344	Hippocampus
NM_001009979	0.3032	Lung
NM_001010825	0.2105	Lung
NM_001010826	0.4386	Spleen
NM_001010827	0.3742	Spleen
NM_001010828	0.5466	Spleen
NM_001010829	0.4289	Spleen
NM_001010830	0.4175	Spleen
NM_001010831	0.5692	Spleen
NM_001010833	0.2566	Thymus
NM_001010834	0.6793	Liver
NM_001010835	0.7232	Spleen
NM_001010836	0.3821	Heart
NM_001010837	0.6905	Spleen
NM_001010838	0.5084	Spleen
NM_001010839	0.4498	Spleen
NM_001010840	0.6243	Spleen
NM_001010930	0.2509	Hippocampus
NM_001010937	0.5023	Hippocampus
NM_001010941	0.7748	Hippocampus
NM_001010973	0.4721	Spleen
NM_001011517	0.5354	Spleen
NM_001011518	1.0000	Spleen
NM_001011519	1.0000	Spleen
NM_001011520	0.4430	Thymus
NM_001011523	1.0000	Thymus
NM_001011524	0.3922	Lung
NM_001011525	0.6064	Spleen
NM_001011527	1.0000	Thymus
NM_001011528	0.4240	Lung
NM_001011529	0.6365	Spleen
NM_001011530	0.6147	Spleen
NM_001011531	0.4880	Thymus
NM_001011532	1.0000	Thymus
NM_001011533	0.3617	Lung
NM_001011534	0.4640	Thymus
NM_001011535	NA	NA
NM_001011536	0.6298	Liver
NM_001011542	0.5720	Spleen
NM_001011662	0.4404	Lung
NM_001011684	1.0000	Thymus
NM_001011687	0.4906	Liver
NM_001011695	0.4829	Thymus
NM_001011707	0.4154	Thymus
NM_001011721	0.4463	Spleen
NM_001011732	0.7304	Hippocampus
NM_001011733	0.4714	Hippocampus
NM_001011734	NA	NA
NM_001011735	NA	NA
NM_001011736	1.0000	Lung
NM_001011737	0.8095	Thymus
NM_001011738	0.7566	Spleen
NM_001011739	0.7435	Spleen
NM_001011740	0.5572	Spleen
NM_001011741	0.6605	Spleen
NM_001011742	0.6159	Spleen
NM_001011743	0.4909	Spleen
NM_001011748	0.7297	Spleen
NM_001011749	0.6991	Spleen
NM_001011750	1.0000	Spleen
NM_001011751	0.5971	Spleen
NM_001011752	0.5702	Spleen
NM_001011753	0.4215	Spleen
NM_001011754	0.4616	Lung
NM_001011755	0.4195	Spleen
NM_001011756	0.6358	Spleen
NM_001011757	0.7190	Spleen
NM_001011758	0.6668	Spleen
NM_001011759	1.0000	Spleen
NM_001011760	0.4807	Spleen
NM_001011761	0.5918	Spleen
NM_001011767	0.6000	Thymus
NM_001011769	0.6260	Hippocampus
NM_001011770	0.5213	Spleen
NM_001011771	0.5526	Thymus
NM_001011773	0.5832	Spleen
NM_001011774	0.3373	Spleen
NM_001011775	0.3517	Thymus
NM_001011776	0.3791	Spleen
NM_001011777	0.4829	Spleen
NM_001011778	NA	NA
NM_001011779	0.5075	Spleen
NM_001011780	0.7541	Hippocampus
NM_001011782	0.3777	Thymus
NM_001011784	0.5230	Spleen
NM_001011785	0.8146	Spleen
NM_001011787	0.8215	Spleen
NM_001011789	0.4056	Spleen
NM_001011790	0.5227	Spleen
NM_001011791	0.6144	Spleen
NM_001011792	NA	NA
NM_001011793	0.5325	Spleen
NM_001011794	0.4500	Spleen
NM_001011795	1.0000	Spleen
NM_001011796	0.6700	Spleen
NM_001011797	0.5584	Spleen
NM_001011798	1.0000	Spleen
NM_001011799	1.0000	Thymus
NM_001011800	0.5516	Spleen
NM_001011801	0.7554	Spleen
NM_001011802	0.8725	Spleen
NM_001011803	0.6215	Spleen
NM_001011804	0.5363	Spleen
NM_001011805	0.5193	Spleen
NM_001011806	0.5001	Spleen
NM_001011807	1.0000	Spleen
NM_001011808	0.5703	Spleen
NM_001011809	0.5227	Spleen
NM_001011810	NA	NA
NM_001011811	1.0000	Spleen
NM_001011812	0.5910	Spleen
NM_001011813	0.7284	Spleen
NM_001011814	0.4836	Thymus
NM_001011815	1.0000	Spleen
NM_001011816	1.0000	Spleen
NM_001011818	0.7782	Hippocampus
NM_001011819	1.0000	Spleen
NM_001011820	0.5560	Spleen
NM_001011820_dup1	NA	NA
NM_001011821	1.0000	Spleen
NM_001011822	0.6359	Spleen
NM_001011823	0.4605	Lung
NM_001011824	0.4828	Thymus
NM_001011825	0.6086	Spleen
NM_001011826	1.0000	Thymus
NM_001011827	0.5830	Spleen
NM_001011828	0.7297	Spleen
NM_001011829	0.4945	Spleen
NM_001011830	0.4634	Lung
NM_001011831	0.5584	Spleen
NM_001011832	1.0000	Spleen
NM_001011833	1.0000	Thymus
NM_001011834	0.4258	Lung
NM_001011835	0.4307	Lung
NM_001011836	0.4645	Thymus
NM_001011837	0.4380	Lung
NM_001011839	1.0000	Spleen
NM_001011840	0.7746	Spleen
NM_001011841	0.5902	Spleen
NM_001011842	0.4603	Spleen
NM_001011845	0.4243	Lung
NM_001011846	0.6359	Spleen
NM_001011847	NA	NA
NM_001011848	1.0000	Spleen
NM_001011849	NA	NA
NM_001011850	0.5714	Spleen
NM_001011851	0.5417	Spleen
NM_001011852	0.4287	Liver
NM_001011853	0.4636	Spleen
NM_001011854	0.6357	Spleen
NM_001011855	0.4656	Spleen
NM_001011856	0.5032	Spleen
NM_001011857	1.0000	Thymus
NM_001011858	NA	NA
NM_001011859	0.6555	Spleen
NM_001011860	1.0000	Thymus
NM_001011861	0.5910	Spleen
NM_001011862	0.4829	Thymus
NM_001011863	0.6334	Spleen
NM_001011864	0.5446	Spleen
NM_001011865	0.5273	Spleen
NM_001011866	0.4375	Lung
NM_001011867	0.3095	Spleen
NM_001011868	0.4720	Thymus
NM_001011869	1.0000	Spleen
NM_001011870	0.5505	Thymus
NM_001011871	1.0000	Spleen
NM_001011872	0.5143	Liver
NM_001011873	0.8155	Liver
NM_001011874	0.7910	Hippocampus
NM_001011875	0.6118	Spleen
NM_001011876	NA	NA
NM_001011877	1.0000	Spleen
NM_001012236	0.2711	Spleen
NM_001012265	0.3782	Spleen
NM_001012266	1.0000	Spleen
NM_001012269	0.7018	Spleen
NM_001012273	0.4955	Thymus
NM_001012305	0.7727	Hippocampus
NM_001012306	0.9262	Liver
NM_001012307	1.0000	Thymus
NM_001012307_dup1	NA	NA
NM_001012309	0.2476	Lung
NM_001012310	0.5211	Liver
NM_001012311	0.3718	Hippocampus
NM_001012322	0.4274	Hippocampus
NM_001012323	0.8118	Liver
NM_001012324	0.3321	Lung
NM_001012325	0.2397	Liver
NM_001012330	0.2867	Hippocampus
NM_001012335	0.3474	Hippocampus
NM_001012336	0.2655	Thymus
NM_001012363	0.5842	Liver
NM_001012392	0.6802	Lung
NM_001012396	0.2536	Lung
NM_001012400	0.2482	Liver
NM_001012401	0.4220	Heart
NM_001012402	0.4042	Thymus
NM_001012434	0.3558	Spleen
NM_001012448	0.3321	Thymus
NM_001012449	0.3374	Liver
NM_001012450	0.3256	Thymus
NM_001012451	0.3726	Thymus
NM_001012477	0.2709	Heart
NM_001012517	0.2565	Lung
NM_001012518	0.3175	Hippocampus
NM_001012520	0.5697	Spleen
NM_001012623	0.9343	Hippocampus
NM_001012624	0.9380	Hippocampus
NM_001012625	0.9510	Hippocampus
NM_001012638	0.2322	Spleen
NM_001012640	0.8188	Thymus
NM_001012667	0.3439	Liver
NM_001012704	0.5589	Lung
NM_001012723	0.7837	Lung
NM_001012725	0.8561	Lung
NM_001012726	0.7241	Spleen
NM_001012765	0.3300	Heart
NM_001012766	0.4830	Lung
NM_001013012	0.2106	Heart
NM_001013013	0.7297	Heart
NM_001013019	0.3658	Heart
NM_001013022	0.4099	Lung
NM_001013023	0.2585	Thymus
NM_001013024	0.5284	Heart
NM_001013025	0.2144	Lung
NM_001013026	0.3258	Thymus
NM_001013028	0.2330	Thymus
NM_001013256	0.2359	Hippocampus
NM_001013360	0.4722	Hippocampus
NM_001013362	0.2869	Lung
NM_001013365	0.4416	Spleen
NM_001013366	0.2223	Thymus
NM_001013367	0.2232	Lung
NM_001013368	0.4044	Thymus
NM_001013369	0.4782	Spleen
NM_001013370	0.2289	Spleen
NM_001013371	0.2507	Thymus
NM_001013372	0.4205	Spleen
NM_001013373	0.4237	Heart
NM_001013374	0.2224	Thymus
NM_001013375	0.2321	Thymus
NM_001013376	0.2153	Thymus
NM_001013377	0.4407	Thymus
NM_001013378	0.2468	Thymus
NM_001013379	0.2265	Thymus
NM_001013380	0.2365	Lung
NM_001013381	0.2577	Heart
NM_001013382	0.6889	Heart
NM_001013384	0.4251	Spleen
NM_001013385	0.6413	Hippocampus
NM_001013386	0.4686	Hippocampus
NM_001013387	0.3242	Spleen
NM_001013389	0.2166	Hippocampus
NM_001013390	0.3572	Heart
NM_001013391	0.2421	Thymus
NM_001013393	0.5411	Spleen
NM_001013405	0.2669	Heart
NM_001013411	0.8185	Hippocampus
NM_001013412	NA	NA
NM_001013414	0.2393	Hippocampus
NM_001013441	0.2345	Heart
NM_001013575	0.5693	Spleen
NM_001013577	0.2643	Thymus
NM_001013578	0.3339	Thymus
NM_001013580	0.4177	Lung
NM_001013581	0.4537	Liver
NM_001013607	0.4352	Thymus
NM_001013608	0.2298	Thymus
NM_001013609	0.5645	Spleen
NM_001013616	0.2616	Liver
NM_001013741	0.8584	Hippocampus
NM_001013745	0.4762	Lung
NM_001013749	0.4761	Hippocampus
NM_001013750	0.5695	Spleen
NM_001013751	0.5733	Hippocampus
NM_001013753	0.3831	Hippocampus
NM_001013755	0.3597	Hippocampus
NM_001013756	0.3360	Hippocampus
NM_001013757	0.7559	Spleen
NM_001013758	0.4818	Hippocampus
NM_001013759	0.6377	Lung
NM_001013760	0.5531	Thymus
NM_001013761	0.4594	Hippocampus
NM_001013762	0.8119	Liver
NM_001013764	0.5545	Liver
NM_001013765	0.4044	Thymus
NM_001013766	0.4424	Spleen
NM_001013767	0.2825	Thymus
NM_001013769	0.2822	Spleen
NM_001013770	0.2656	Lung
NM_001013771	0.4848	Lung
NM_001013773	0.4322	Spleen
NM_001013774	0.5078	Thymus
NM_001013776	0.3776	Lung
NM_001013777	0.6720	Hippocampus
NM_001013778	0.4367	Hippocampus
NM_001013779	0.3561	Spleen
NM_001013780	0.5183	Heart
NM_001013783	0.5917	Thymus
NM_001013784	0.5834	Hippocampus
NM_001013785	0.5215	Liver
NM_001013786	0.2018	Lung
NM_001013787	0.6713	Spleen
NM_001013792	0.2286	Spleen
NM_001013797	1.0000	Thymus
NM_001013799	0.4405	Thymus
NM_001013802	0.6310	Hippocampus
NM_001013804	0.4687	Thymus
NM_001013806	0.2132	Hippocampus
NM_001013810	0.5823	Spleen
NM_001013811	0.3503	Thymus
NM_001013813	0.2768	Lung
NM_001013814	0.3591	Liver
NM_001013816	0.3375	Spleen
NM_001013817	0.3239	Spleen
NM_001013820	0.9108	Liver
NM_001013823	0.5231	Spleen
NM_001013824	0.5272	Thymus
NM_001013826	0.3853	Hippocampus
NM_001013829	0.2823	Hippocampus
NM_001013832	0.3914	Spleen
NM_001013833	0.4470	Lung
NM_001014288	0.3316	Lung
NM_001014390	0.2099	Thymus
NM_001014394	0.3201	Spleen
NM_001014395	0.6343	Spleen
NM_001014397	0.3136	Spleen
NM_001014398	0.5194	Spleen
NM_001014399	0.3430	Lung
NM_001014422	0.4226	Spleen
NM_001014423	0.5398	Lung
NM_001014424	0.4544	Lung
NM_001014761	0.5544	Hippocampus
NM_001014836	0.2420	Lung
NM_001014900	0.5902	Lung
NM_001014973	0.2188	Lung
NM_001014974	0.2694	Thymus
NM_001014976	0.4664	Thymus
NM_001014981	0.3022	Hippocampus
NM_001014995	0.2750	Thymus
NM_001014996	0.3339	Thymus
NM_001014997	0.6341	Thymus
NM_001015039	0.4040	Hippocampus
NM_001015046	0.3298	Hippocampus
NM_001015099	0.3296	Thymus
NM_001015507	0.2206	Thymus
NM_001015681	0.2573	Thymus
NM_001015876	0.2219	Spleen
NM_001015889	0.2751	Hippocampus
NM_001017362	0.4407	Spleen
NM_001017393	NA	NA
NM_001017393_dup1	NA	NA
NM_001017394	NA	NA
NM_001017407	0.6326	Thymus
NM_001017409	0.7972	Thymus
NM_001017419	0.5827	Thymus
NM_001017422	NA	NA
NM_001017426	0.2648	Thymus
NM_001017427	0.5326	Lung
NM_001017429	0.2112	Heart
NM_001017433	0.6434	Thymus
NM_001017441	0.5289	Hippocampus
NM_001017525	0.3552	Thymus
NM_001017955	0.4735	Hippocampus
NM_001017959	0.2683	Liver
NM_001017966	0.2588	Liver
NM_001017968	0.2374	Spleen
NM_001017983	0.3711	Hippocampus
NM_001017985	0.2659	Thymus
NM_001018002	0.5726	Spleen
NM_001018013	0.4741	Spleen
NM_001018019	1.0000	Spleen
NM_001018031	0.4592	Thymus
NM_001018042	0.2582	Thymus
NM_001018063	0.2347	Hippocampus
NM_001018079	0.6520	Spleen
NM_001018087	0.5173	Hippocampus
NM_001024134	0.2566	Lung
NM_001024135	0.2526	Hippocampus
NM_001024136	0.3602	Hippocampus
NM_001024137	0.4926	Thymus
NM_001024138	0.6556	Hippocampus
NM_001024139	0.5072	Lung
NM_001024141	0.3586	Heart
NM_001024142	0.2970	Hippocampus
NM_001024145	0.5108	Lung
NM_001024147	0.5286	Thymus
NM_001024148	0.8872	Liver
NM_001024205	0.2335	Thymus
NM_001024206	0.2050	Liver
NM_001024225	1.0000	Thymus
NM_001024230	0.3278	Spleen
NM_001024385	0.2410	Hippocampus
NM_001024458	0.2136	Hippocampus
NM_001024468	0.8416	Hippocampus
NM_001024474	0.4160	Hippocampus
NM_001024478	0.7094	Lung
NM_001024504	0.3215	Heart
NM_001024508	0.2345	Hippocampus
NM_001024512	0.2192	Heart
NM_001024526	0.2206	Thymus
NM_001024539	0.4918	Hippocampus
NM_001024560	0.3464	Hippocampus
NM_001024602	0.3091	Hippocampus
NM_001024604	0.2332	Thymus
NM_001024606	0.2431	Liver
NM_001024614	0.6297	Lung
NM_001024616	0.2344	Hippocampus
NM_001024617	0.2693	Thymus
NM_001024618	0.6413	Heart
NM_001024619	0.2816	Liver
NM_001024622	0.2068	Hippocampus
NM_001024624	0.3713	Hippocampus
NM_001024626	0.2589	Thymus
NM_001024645	0.4766	Hippocampus
NM_001024672	0.4951	Liver
NM_001024673	0.5721	Spleen
NM_001024698	0.4561	Hippocampus
NM_001024699	0.2537	Thymus
NM_001024702	0.3393	Hippocampus
NM_001024703	0.2880	Liver
NM_001024705	0.4570	Thymus
NM_001024706	0.6204	Hippocampus
NM_001024707	0.3625	Hippocampus
NM_001024709	0.5620	Spleen
NM_001024712	0.3856	Hippocampus
NM_001024714	0.4247	Spleen
NM_001024716	0.2368	Lung
NM_001024717	0.4416	Hippocampus
NM_001024719	0.7835	Liver
NM_001024720	0.4519	Lung
NM_001024721	0.4768	Spleen
NM_001024726	0.3033	Thymus
NM_001024727	0.6241	Spleen
NM_001024728	0.2266	Spleen
NM_001024806	0.2159	Thymus
NM_001024837	0.6176	Hippocampus
NM_001024841	0.3631	Lung
NM_001024842	0.6698	Thymus
NM_001024846	0.3101	Hippocampus
NM_001024848	0.4008	Thymus
NM_001024848_dup1	NA	NA
NM_001024850	1.0000	Spleen
NM_001024851	0.6975	Hippocampus
NM_001024853	0.2642	Hippocampus
NM_001024854	0.2230	Hippocampus
NM_001024856	0.3592	Hippocampus
NM_001024857	0.3180	Hippocampus
NM_001024910	0.5771	Lung
NM_001024911	0.2604	Lung
NM_001024917	0.3077	Thymus
NM_001024918	0.5145	Hippocampus
NM_001024919	0.2373	Heart
NM_001024920	0.2498	Thymus
NM_001024922	0.2227	Thymus
NM_001024926	0.2323	Heart
NM_001024927	0.4035	Hippocampus
NM_001024928	0.2875	Hippocampus
NM_001024931	0.6935	Hippocampus
NM_001024932	0.5027	Spleen
NM_001024945	0.2531	Lung
NM_001024950	0.2484	Hippocampus
NM_001024952	0.2413	Thymus
NM_001024954	0.3393	Hippocampus
NM_001024955	0.2802	Thymus
NM_001025067	0.2387	Hippocampus
NM_001025074	0.8464	Hippocampus
NM_001025083	0.6284	Thymus
NM_001025084	1.0000	Spleen
NM_001025085	0.5105	Spleen
NM_001025086	0.4511	Spleen
NM_001025093	0.2467	Hippocampus
NM_001025102	0.2467	Hippocampus
NM_001025103	0.4405	Lung
NM_001025106	0.2298	Thymus
NM_001025156	0.2475	Thymus
NM_001025163	0.2969	Hippocampus
NM_001025192	0.2684	Lung
NM_001025208	0.4936	Liver
NM_001025240	0.4101	Spleen
NM_001025241	NA	NA
NM_001025241_dup1	NA	NA
NM_001025241_dup2	NA	NA
NM_001025244	0.6642	Spleen
NM_001025245	0.2932	Thymus
NM_001025246	0.2433	Thymus
NM_001025250	0.3837	Lung
NM_001025251	0.6091	Hippocampus
NM_001025254	0.5373	Hippocampus
NM_001025255	0.6753	Hippocampus
NM_001025256	0.6448	Hippocampus
NM_001025257	0.4020	Lung
NM_001025258	0.3785	Hippocampus
NM_001025259	0.7149	Hippocampus
NM_001025260	0.4120	Spleen
NM_001025261	0.4462	Hippocampus
NM_001025262	0.3871	Lung
NM_001025263	0.3545	Hippocampus
NM_001025264	0.2770	Heart
NM_001025286	0.4694	Spleen
NM_001025296	0.2089	Thymus
NM_001025305	0.4701	Thymus
NM_001025307	0.3541	Hippocampus
NM_001025309	0.2594	Hippocampus
NM_001025310	0.2836	Liver
NM_001025311	0.2925	Hippocampus
NM_001025312	0.3646	Thymus
NM_001025313	0.2375	Spleen
NM_001025351	NA	NA
NM_001025353	1.0000	Thymus
NM_001025360	0.2822	Lung
NM_001025364	0.3722	Heart
NM_001025365	0.2690	Thymus
NM_001025371	0.2655	Lung
NM_001025372	0.5027	Hippocampus
NM_001025373	0.2098	Spleen
NM_001025375	0.2259	Lung
NM_001025376	0.2200	Liver
NM_001025377	0.4373	Thymus
NM_001025378	0.2689	Thymus
NM_001025379	0.4426	Lung
NM_001025380	0.8412	Spleen
NM_001025381	0.5420	Hippocampus
NM_001025382	0.3492	Spleen
NM_001025383	0.4148	Hippocampus
NM_001025383_dup1	NA	NA
NM_001025384	0.4125	Hippocampus
NM_001025384_dup1	NA	NA
NM_001025385	0.4402	Thymus
NM_001025386	0.4455	Thymus
NM_001025388	0.2047	Hippocampus
NM_001025391	0.2605	Spleen
NM_001025392	0.2306	Hippocampus
NM_001025393	0.2823	Thymus
NM_001025395	0.2834	Lung
NM_001025426	0.2672	Hippocampus
NM_001025427	0.3222	Thymus
NM_001025428	0.5195	Heart
NM_001025429	0.4945	Hippocampus
NM_001025430	0.2854	Hippocampus
NM_001025431	0.2974	Hippocampus
NM_001025432	0.2388	Thymus
NM_001025435	0.2997	Spleen
NM_001025438	0.2595	Heart
NM_001025439	0.3626	Heart
NM_001025444	0.2330	Lung
NM_001025559	0.2693	Liver
NM_001025560	0.3723	Heart
NM_001025561	0.3298	Spleen
NM_001025562	0.2260	Spleen
NM_001025565	0.5964	Hippocampus
NM_001025566	0.2860	Hippocampus
NM_001025567	0.4835	Spleen
NM_001025568	0.8627	Heart
NM_001025570	0.3636	Lung
NM_001025571	0.4738	Thymus
NM_001025572	0.2617	Hippocampus
NM_001025573	0.6364	Thymus
NM_001025574	0.8315	Thymus
NM_001025575	0.6142	Liver
NM_001025576	0.3203	Heart
NM_001025577	0.2563	Spleen
NM_001025581	0.7788	Hippocampus
NM_001025582	0.2842	Liver
NM_001025584	0.8962	Hippocampus
NM_001025585	0.4017	Spleen
NM_001025586	0.2185	Thymus
NM_001025587	0.2224	Thymus
NM_001025589	0.2358	Thymus
NM_001025590	0.4073	Spleen
NM_001025594	0.2067	Thymus
NM_001025597	0.3820	Thymus
NM_001025599	0.2391	Spleen
NM_001025600	0.3935	Hippocampus
NM_001025602	0.4015	Spleen
NM_001025605	0.2569	Lung
NM_001025606	0.4524	Heart
NM_001025607	NA	NA
NM_001025608	0.2285	Lung
NM_001025610	0.3788	Thymus
NM_001025612	0.2930	Spleen
NM_001025613	0.3089	Lung
NM_001025614	0.2750	Lung
NM_001025615	0.2800	Spleen
NM_001025617	0.2466	Thymus
NM_001025618	0.2366	Spleen
NM_001025779	0.4577	Thymus
NM_001025947	0.2072	Heart
NM_001026211	0.2413	Lung
NM_001026212	0.2158	Hippocampus
NM_001026214	0.2667	Liver
NM_001029836	0.4150	Lung
NM_001029837	0.3792	Spleen
NM_001029838	0.3088	Lung
NM_001029841	0.3962	Thymus
NM_001029842	0.3811	Spleen
NM_001029843	0.2828	Thymus
NM_001029844	0.2712	Thymus
NM_001029850	0.4138	Lung
NM_001029855	0.2994	Spleen
NM_001029856	0.4157	Thymus
NM_001029867	0.7164	Liver
NM_001029868	0.4307	Hippocampus
NM_001029872	0.6035	Spleen
NM_001029873	0.7834	Hippocampus
NM_001029876	0.2743	Thymus
NM_001029877	0.4354	Hippocampus
NM_001029878	0.6093	Hippocampus
NM_001029889	0.2096	Hippocampus
NM_001029890	0.5109	Thymus
NM_001029893	0.4554	Thymus
NM_001029895	0.3013	Lung
NM_001029912	0.4254	Hippocampus
NM_001029929	0.2822	Thymus
NM_001029930	0.4280	Hippocampus
NM_001029933	0.3919	Hippocampus
NM_001029934	0.2512	Hippocampus
NM_001029935	0.2956	Heart
NM_001029936	0.3244	Hippocampus
NM_001029937	0.8006	Lung
NM_001029938	0.3351	Heart
NM_001029977	0.7457	Liver
NM_001029978	0.5965	Hippocampus
NM_001029979	0.2256	Lung
NM_001029982	0.2184	Thymus
NM_001029983	0.2182	Lung
NM_001029984	0.4043	Spleen
NM_001029985	0.3501	Heart
NM_001029987	0.4616	Spleen
NM_001029988	0.5392	Thymus
NM_001029990	0.2141	Spleen
NM_001029993	0.3100	Thymus
NM_001029994	0.2308	Thymus
NM_001030014	0.2349	Heart
NM_001030274	0.2270	Heart
NM_001030289	0.2880	Lung
NM_001030290	0.6351	Spleen
NM_001030291	0.5187	Spleen
NM_001030292	0.5433	Spleen
NM_001030293	NA	NA
NM_001030294	0.4056	Thymus
NM_001030296	0.5108	Hippocampus
NM_001030297	1.0000	Thymus
NM_001030305	0.7143	Thymus
NM_001030306	0.2237	Thymus
NM_001030307	0.2466	Thymus
NM_001031621	0.4778	Lung
NM_001031622	0.5671	Thymus
NM_001031622_dup1	NA	NA
NM_001031622_dup2	NA	NA
NM_001031622_dup3	NA	NA
NM_001031664	0.5792	Hippocampus
NM_001031667	0.2215	Hippocampus
NM_001031772	0.5658	Hippocampus
NM_001031808	0.2194	Heart
NM_001031811	0.6501	Hippocampus
NM_001031814	0.2538	Thymus
NM_001031851	0.7903	Liver
NM_001032298	0.4469	Liver
NM_001032378	0.2952	Lung
NM_001032413	0.2967	Lung
NM_001032414	0.3550	Heart
NM_001032727	0.7829	Hippocampus
NM_001033039	0.2883	Hippocampus
NM_001033040	0.3057	Lung
NM_001033041	0.6494	Liver
NM_001033042	0.4348	Heart
NM_001033043	0.3638	Hippocampus
NM_001033122	0.4153	Thymus
NM_001033123	0.2559	Hippocampus
NM_001033123_dup1	NA	NA
NM_001033123_dup2	NA	NA
NM_001033124	0.3556	Lung
NM_001033126	0.4636	Thymus
NM_001033128	0.3729	Hippocampus
NM_001033131	0.7903	Thymus
NM_001033132	0.2038	Lung
NM_001033135	0.2448	Liver
NM_001033136	0.2142	Liver
NM_001033139	0.2645	Thymus
NM_001033140	0.2207	Heart
NM_001033141	0.3549	Lung
NM_001033142	0.2351	Thymus
NM_001033145	0.2448	Lung
NM_001033148	0.3082	Lung
NM_001033149	0.3656	Hippocampus
NM_001033150	0.2513	Heart
NM_001033155	0.2705	Hippocampus
NM_001033156	0.2351	Hippocampus
NM_001033157	0.3004	Thymus
NM_001033158	0.3913	Lung
NM_001033159	0.2346	Thymus
NM_001033161	0.2386	Thymus
NM_001033162	0.4904	Hippocampus
NM_001033163	0.3127	Lung
NM_001033164	0.2115	Spleen
NM_001033165	0.2535	Liver
NM_001033166	0.2554	Thymus
NM_001033167	0.2535	Liver
NM_001033168	0.4974	Thymus
NM_001033170	0.5333	Lung
NM_001033171	0.4817	Lung
NM_001033172	0.3614	Hippocampus
NM_001033173	0.2973	Hippocampus
NM_001033174	0.2040	Heart
NM_001033175	0.2223	Spleen
NM_001033176	0.7401	Spleen
NM_001033177	0.9089	Thymus
NM_001033178	0.2723	Hippocampus
NM_001033181	NA	NA
NM_001033184	1.0000	Spleen
NM_001033185	0.6165	Hippocampus
NM_001033186	0.5318	Thymus
NM_001033189	0.2747	Lung
NM_001033191	0.3827	Spleen
NM_001033192	0.2302	Lung
NM_001033194	0.2244	Hippocampus
NM_001033196	0.2206	Lung
NM_001033197	0.3965	Spleen
NM_001033199	0.6296	Thymus
NM_001033201	0.2385	Thymus
NM_001033202	0.2364	Hippocampus
NM_001033204	0.2605	Liver
NM_001033205	0.7278	Hippocampus
NM_001033206	0.3517	Lung
NM_001033207	0.3156	Spleen
NM_001033208	0.3714	Heart
NM_001033209	0.4978	Liver
NM_001033210	0.3126	Lung
NM_001033211	0.4354	Hippocampus
NM_001033212	0.6447	Hippocampus
NM_001033213	0.2566	Hippocampus
NM_001033214	0.4205	Spleen
NM_001033215	0.3596	Thymus
NM_001033217	0.2827	Lung
NM_001033219	0.2287	Hippocampus
NM_001033220	0.3380	Lung
NM_001033221	0.4838	Spleen
NM_001033222	0.2186	Thymus
NM_001033223	0.4437	Hippocampus
NM_001033225	0.2188	Thymus
NM_001033226	0.3513	Hippocampus
NM_001033227	0.3831	Thymus
NM_001033228	0.3179	Lung
NM_001033229	0.6497	Thymus
NM_001033231	0.2078	Spleen
NM_001033233	0.3659	Spleen
NM_001033234	1.0000	Thymus
NM_001033235	0.4058	Spleen
NM_001033236	0.2323	Thymus
NM_001033237	0.2994	Thymus
NM_001033238	0.2442	Spleen
NM_001033239	0.5139	Thymus
NM_001033240	0.5159	Lung
NM_001033241	0.3870	Spleen
NM_001033242	0.2273	Lung
NM_001033243	0.4156	Lung
NM_001033244	0.4233	Thymus
NM_001033245	0.4235	Spleen
NM_001033246	0.5116	Hippocampus
NM_001033247	0.6465	Lung
NM_001033248	0.4638	Hippocampus
NM_001033249	0.3009	Hippocampus
NM_001033250	0.5529	Hippocampus
NM_001033251	0.5130	Spleen
NM_001033252	0.4864	Spleen
NM_001033253	0.2880	Hippocampus
NM_001033254	0.4779	Hippocampus
NM_001033255	0.5072	Spleen
NM_001033257	0.3632	Lung
NM_001033258	0.5320	Hippocampus
NM_001033259	0.2148	Hippocampus
NM_001033260	0.3389	Lung
NM_001033261	0.2491	Thymus
NM_001033262	0.3301	Hippocampus
NM_001033263	0.4417	Hippocampus
NM_001033264	0.5051	Liver
NM_001033266	0.7367	Thymus
NM_001033267	0.3847	Thymus
NM_001033268	0.2109	Thymus
NM_001033269	0.5416	Thymus
NM_001033270	0.2459	Hippocampus
NM_001033271	0.2296	Spleen
NM_001033272	0.2951	Thymus
NM_001033273	0.2233	Spleen
NM_001033274	0.2394	Thymus
NM_001033275	0.2573	Lung
NM_001033276	0.2488	Thymus
NM_001033277	0.2592	Hippocampus
NM_001033279	0.2031	Hippocampus
NM_001033280	0.8123	Thymus
NM_001033281	0.7450	Lung
NM_001033283	0.5240	Spleen
NM_001033284	0.2672	Liver
NM_001033285	0.2903	Hippocampus
NM_001033286	0.5131	Liver
NM_001033288	0.3522	Lung
NM_001033289	0.3602	Hippocampus
NM_001033290	0.4603	Spleen
NM_001033291	0.5088	Spleen
NM_001033292	0.4564	Thymus
NM_001033293	0.2705	Lung
NM_001033294	0.2714	Thymus
NM_001033296	1.0000	Thymus
NM_001033297	0.2254	Heart
NM_001033298	0.2416	Heart
NM_001033299	0.2981	Thymus
NM_001033300	0.2117	Thymus
NM_001033301	0.4836	Lung
NM_001033302	0.2791	Hippocampus
NM_001033303	0.5907	Thymus
NM_001033304	0.4416	Lung
NM_001033305	0.2255	Heart
NM_001033306	0.2479	Lung
NM_001033308	0.3905	Spleen
NM_001033310	0.2185	Hippocampus
NM_001033311	0.3521	Lung
NM_001033312	0.3189	Hippocampus
NM_001033313	0.2254	Lung
NM_001033314	0.2674	Thymus
NM_001033315	0.6804	Hippocampus
NM_001033316	0.5510	Spleen
NM_001033317	0.7837	Hippocampus
NM_001033318	0.2294	Hippocampus
NM_001033319	0.2358	Thymus
NM_001033320	0.3622	Thymus
NM_001033321	0.2817	Lung
NM_001033322	0.3797	Hippocampus
NM_001033323	0.4399	Hippocampus
NM_001033324	0.2947	Lung
NM_001033325	1.0000	Thymus
NM_001033326	NA	NA
NM_001033328	0.2048	Hippocampus
NM_001033329	0.4799	Hippocampus
NM_001033330	0.8498	Hippocampus
NM_001033331	0.4720	Thymus
NM_001033332	0.3453	Liver
NM_001033333	0.5494	Heart
NM_001033334	0.5299	Hippocampus
NM_001033335	0.3109	Spleen
NM_001033336	0.2110	Spleen
NM_001033337	0.2738	Liver
NM_001033338	0.5140	Hippocampus
NM_001033339	0.4815	Thymus
NM_001033340	0.7417	Heart
NM_001033341	0.2485	Thymus
NM_001033342	0.3978	Lung
NM_001033343	0.4404	Heart
NM_001033344	0.7681	Heart
NM_001033345	0.6025	Lung
NM_001033346	0.4909	Hippocampus
NM_001033347	0.5617	Hippocampus
NM_001033348	0.2329	Heart
NM_001033349	0.5285	Hippocampus
NM_001033350	0.4783	Spleen
NM_001033351	0.8289	Hippocampus
NM_001033352	0.2567	Heart
NM_001033354	0.8262	Hippocampus
NM_001033355	0.2384	Heart
NM_001033356	0.4678	Hippocampus
NM_001033359	0.7371	Heart
NM_001033360	0.8632	Hippocampus
NM_001033361	0.3907	Spleen
NM_001033362	0.4473	Spleen
NM_001033364	0.5558	Thymus
NM_001033365	0.7890	Hippocampus
NM_001033366	0.5740	Lung
NM_001033367	0.4901	Spleen
NM_001033369	0.5105	Hippocampus
NM_001033371	0.6258	Lung
NM_001033372	0.4960	Thymus
NM_001033373	0.4509	Hippocampus
NM_001033374	0.6049	Hippocampus
NM_001033375	0.2172	Thymus
NM_001033378	0.4160	Spleen
NM_001033379	0.2683	Thymus
NM_001033380	0.3619	Lung
NM_001033382	0.3977	Thymus
NM_001033383	0.2341	Thymus
NM_001033385	0.2560	Lung
NM_001033389	0.2396	Lung
NM_001033391	0.4178	Thymus
NM_001033393	0.2088	Spleen
NM_001033394	0.5779	Hippocampus
NM_001033397	0.5001	Spleen
NM_001033399	0.3217	Hippocampus
NM_001033400	0.7559	Spleen
NM_001033404	1.0000	Thymus
NM_001033405	0.4249	Spleen
NM_001033407	0.4868	Spleen
NM_001033408	0.5346	Thymus
NM_001033409	0.4565	Heart
NM_001033410	1.0000	Thymus
NM_001033411	0.4393	Heart
NM_001033412	0.4861	Spleen
NM_001033415	0.3724	Spleen
NM_001033416	0.3146	Hippocampus
NM_001033418	0.4732	Spleen
NM_001033419	0.6312	Spleen
NM_001033420	0.2812	Lung
NM_001033421	0.3838	Hippocampus
NM_001033422	0.2427	Thymus
NM_001033423	0.4492	Spleen
NM_001033424	0.4630	Spleen
NM_001033425	0.4771	Spleen
NM_001033426	0.4792	Hippocampus
NM_001033427	0.4487	Thymus
NM_001033428	0.6656	Spleen
NM_001033429	0.4694	Hippocampus
NM_001033430	0.2327	Spleen
NM_001033431	0.5881	Liver
NM_001033432	0.2210	Lung
NM_001033433	0.3234	Liver
NM_001033434	0.4377	Spleen
NM_001033435	0.3495	Spleen
NM_001033436	0.2805	Thymus
NM_001033437	0.5210	Heart
NM_001033438	0.4162	Spleen
NM_001033439	0.2528	Lung
NM_001033440	0.3759	Spleen
NM_001033441	0.2210	Thymus
NM_001033442	0.5429	Hippocampus
NM_001033442_dup1	NA	NA
NM_001033443	0.4713	Hippocampus
NM_001033444	0.5157	Thymus
NM_001033445	0.3016	Hippocampus
NM_001033446	0.4116	Thymus
NM_001033448	0.2867	Spleen
NM_001033449	0.3283	Hippocampus
NM_001033450	0.2752	Spleen
NM_001033451	0.2740	Thymus
NM_001033452	0.4692	Thymus
NM_001033453	0.2578	Heart
NM_001033455	0.4217	Thymus
NM_001033457	0.2095	Thymus
NM_001033458	0.3422	Hippocampus
NM_001033459	0.3572	Lung
NM_001033460	0.4155	Lung
NM_001033461	0.6214	Lung
NM_001033463	0.2096	Thymus
NM_001033464	0.3988	Lung
NM_001033465	0.5908	Lung
NM_001033466	0.2791	Thymus
NM_001033468	0.5002	Spleen
NM_001033469	0.5320	Spleen
NM_001033471	0.4621	Spleen
NM_001033472	0.2619	Thymus
NM_001033473	0.6172	Hippocampus
NM_001033474	0.2151	Hippocampus
NM_001033475	0.2450	Spleen
NM_001033477	0.5554	Thymus
NM_001033478	0.4911	Liver
NM_001033479	1.0000	Thymus
NM_001033481	0.3022	Lung
NM_001033484	0.4506	Thymus
NM_001033485	0.6406	Liver
NM_001033488	0.5461	Spleen
NM_001033489	0.7283	Heart
NM_001033490	0.2286	Hippocampus
NM_001033491	0.5747	Spleen
NM_001033492	0.6331	Spleen
NM_001033493	0.3048	Lung
NM_001033496	0.2284	Spleen
NM_001033498	0.6132	Lung
NM_001033499	0.4482	Spleen
NM_001033500	0.4280	Lung
NM_001033525	0.2867	Spleen
NM_001033528	0.2217	Spleen
NM_001033530	0.2188	Spleen
NM_001033531	0.4303	Hippocampus
NM_001033532	0.2263	Lung
NM_001033533	0.3090	Lung
NM_001033534	0.3386	Lung
NM_001033535	0.4573	Hippocampus
NM_001033536	0.2716	Thymus
NM_001033537	0.2227	Heart
NM_001033538	0.5688	Thymus
NM_001033539	0.6124	Spleen
NM_001033540	0.3228	Hippocampus
NM_001033541	0.4060	Spleen
NM_001033542	0.4459	Thymus
NM_001033543	0.3836	Thymus
NM_001033547	0.5714	Spleen
NM_001033548	0.2859	Lung
NM_001033550	0.2906	Hippocampus
NM_001033573	0.3133	Liver
NM_001033597	0.8307	Hippocampus
NM_001033598	0.6830	Hippocampus
NM_001033599	0.8342	Hippocampus
NM_001033600	0.3426	Lung
NM_001033606	0.3416	Hippocampus
NM_001033621	0.8446	Heart
NM_001033630	0.2525	Heart
NM_001033632	0.4109	Spleen
NM_001033633	0.5247	Hippocampus
NM_001033634	0.2478	Hippocampus
NM_001033636	0.2834	Hippocampus
NM_001033638	0.4085	Thymus
NM_001033654	0.2463	Spleen
NM_001033668	0.4802	Lung
NM_001033669	0.4553	Thymus
NM_001033711	0.3597	Spleen
NM_001033713	0.2163	Lung
NM_001033759	0.3515	Lung
NM_001033764	0.3342	Thymus
NM_001033765	0.3801	Spleen
NM_001033766	0.5969	Spleen
NM_001033767	0.4458	Liver
NM_001033768	0.2452	Hippocampus
NM_001033769	NA	NA
NM_001033770	NA	NA
NM_001033773	0.7734	Liver
NM_001033774	0.6078	Lung
NM_001033775	0.5136	Liver
NM_001033776	0.6293	Spleen
NM_001033779	0.6234	Spleen
NM_001033780	0.5065	Spleen
NM_001033782	0.5148	Spleen
NM_001033783	0.3861	Spleen
NM_001033785	0.7051	Lung
NM_001033786	NA	NA
NM_001033789	0.3497	Spleen
NM_001033790	0.4414	Spleen
NM_001033791	1.0000	Thymus
NM_001033793	0.4578	Lung
NM_001033794	0.4134	Spleen
NM_001033795	0.8680	Hippocampus
NM_001033799	0.6355	Spleen
NM_001033805	0.3635	Heart
NM_001033807	0.5235	Spleen
NM_001033813	0.4328	Lung
NM_001033819	0.7510	Liver
NM_001033820	0.3064	Hippocampus
NM_001033851	0.3201	Lung
NM_001033865	0.3016	Thymus
NM_001033872	0.2593	Liver
NM_001033874	0.4716	Lung
NM_001033875	0.5177	Thymus
NM_001033876	0.8567	Hippocampus
NM_001033877	0.3679	Lung
NM_001033878	0.5082	Spleen
NM_001033879	0.5845	Spleen
NM_001033880	0.4891	Spleen
NM_001033904	0.6013	Thymus
NM_001033908	0.3643	Hippocampus
NM_001033922	0.5818	Spleen
NM_001033929	0.3603	Liver
NM_001033954	0.4295	Hippocampus
NM_001033960	0.2961	Hippocampus
NM_001033962	0.2198	Thymus
NM_001033966	0.2309	Heart
NM_001033978	0.4629	Spleen
NM_001033979	0.3663	Spleen
NM_001033980	0.7444	Lung
NM_001033981	0.6715	Spleen
NM_001033983	0.5669	Spleen
NM_001033988	0.2447	Thymus
NM_001034013	0.8739	Hippocampus
NM_001034029	0.4328	Lung
NM_001034030	0.5028	Lung
NM_001034031	0.4841	Lung
NM_001034037	0.7473	Lung
NM_001034059	0.4293	Lung
NM_001034060	0.3969	Lung
NM_001034085	0.2441	Thymus
NM_001034097	0.3289	Lung
NM_001034100	0.4425	Liver
NM_001034101	0.4335	Spleen
NM_001034102	NA	NA
NM_001034103	1.0000	Thymus
NM_001034115	0.6174	Hippocampus
NM_001034168	0.7453	Hippocampus
NM_001034851	0.2274	Heart
NM_001034856	0.7863	Spleen
NM_001034858	0.5091	Heart
NM_001034859	0.2719	Heart
NM_001034860	0.3277	Spleen
NM_001034862	0.2595	Thymus
NM_001034863	0.3712	Hippocampus
NM_001034864	0.4014	Spleen
NM_001034866	0.2937	Hippocampus
NM_001034867	0.4061	Heart
NM_001034868	0.3911	Spleen
NM_001034869	0.5292	Spleen
NM_001034871	0.5551	Spleen
NM_001034872	0.4492	Hippocampus
NM_001034873	0.7591	Hippocampus
NM_001034874	0.5924	Hippocampus
NM_001034875	0.3831	Spleen
NM_001034876	0.5488	Lung
NM_001034877	0.4852	Thymus
NM_001034878	0.5696	Lung
NM_001034880	0.4937	Spleen
NM_001034881	0.3695	Spleen
NM_001034882	0.3814	Thymus
NM_001034885	0.4680	Spleen
NM_001034891	0.3215	Spleen
NM_001034893	0.4842	Spleen
NM_001034894	0.6937	Hippocampus
NM_001034895	0.5261	Hippocampus
NM_001034896	0.4652	Thymus
NM_001034898	0.5131	Lung
NM_001034899	0.3617	Hippocampus
NM_001034900	0.4022	Spleen
NM_001034902	0.4223	Thymus
NM_001034903	0.2661	Thymus
NM_001034904	0.3949	Spleen
NM_001034904_dup1	NA	NA
NM_001034905	0.4192	Spleen
NM_001034906	0.3727	Hippocampus
NM_001034907	0.5010	Hippocampus
NM_001034909	0.3463	Thymus
NM_001034910	0.4434	Thymus
NM_001034962	0.3972	Heart
NM_001034963	0.3467	Heart
NM_001034964	0.2756	Heart
NM_001035122	0.2736	Hippocampus
NM_001035123	0.2035	Liver
NM_001035226	0.2564	Spleen
NM_001035228	0.2294	Liver
NM_001035231	0.2685	Thymus
NM_001035239	0.6148	Hippocampus
NM_001035240	0.5088	Hippocampus
NM_001035241	0.7794	Hippocampus
NM_001035242	0.7965	Hippocampus
NM_001035243	0.7671	Hippocampus
NM_001035244	0.8507	Hippocampus
NM_001035245	0.8645	Hippocampus
NM_001035246	0.8668	Hippocampus
NM_001035509	0.5533	Hippocampus
NM_001035510	0.6553	Hippocampus
NM_001035525	0.2838	Spleen
NM_001035526	0.3773	Spleen
NM_001035531	0.3875	Spleen
NM_001035532	0.3269	Lung
NM_001035533	0.5725	Hippocampus
NM_001035854	0.2854	Hippocampus
NM_001036293	0.2102	Spleen
NM_001036684	0.7066	Hippocampus
NM_001036740	0.5275	Spleen
NM_001037098	0.5945	Hippocampus
NM_001037099	0.7506	Hippocampus
NM_001037127	0.4052	Hippocampus
NM_001037128	0.4215	Thymus
NM_001037129	0.2815	Thymus
NM_001037130	0.6113	Thymus
NM_001037134	0.4572	Thymus
NM_001037136	0.5020	Hippocampus
NM_001037143	0.5600	Thymus
NM_001037166	0.3236	Spleen
NM_001037167	0.7426	Spleen
NM_001037168	0.8952	Thymus
NM_001037170	0.2299	Liver
NM_001037177	0.5467	Heart
NM_001037178	0.6721	Hippocampus
NM_001037221	0.4214	Heart
NM_001037247	1.0000	Thymus
NM_001037248	0.6453	Spleen
NM_001037248_dup1	NA	NA
NM_001037248_dup2	NA	NA
NM_001037279	0.3112	Thymus
NM_001037294	0.7017	Heart
NM_001037298	0.3114	Lung
NM_001037321	0.7056	Heart
NM_001037326	0.2526	Thymus
NM_001037493	0.6186	Heart
NM_001037502	1.0000	Thymus
NM_001037539	0.5044	Hippocampus
NM_001037634	0.5690	Spleen
NM_001037665	0.2483	Thymus
NM_001037707	0.2521	Hippocampus
NM_001037709	0.3336	Lung
NM_001037711	0.4336	Lung
NM_001037712	0.3919	Thymus
NM_001037713	0.2381	Lung
NM_001037716	0.5888	Spleen
NM_001037717	0.2381	Thymus
NM_001037718	0.5884	Spleen
NM_001037719	0.4810	Spleen
NM_001037722	0.3624	Hippocampus
NM_001037723	0.3932	Thymus
NM_001037724	0.3000	Spleen
NM_001037725	0.2353	Lung
NM_001037726	0.4236	Thymus
NM_001037727	0.3590	Thymus
NM_001037736	0.2874	Lung
NM_001037737	0.2286	Lung
NM_001037740	0.5374	Heart
NM_001037741	0.2659	Heart
NM_001037742	0.2194	Thymus
NM_001037743	0.5014	Lung
NM_001037744	0.5025	Spleen
NM_001037745	0.3281	Hippocampus
NM_001037746	0.2361	Thymus
NM_001037747	0.3249	Lung
NM_001037748	NA	NA
NM_001037748_dup1	NA	NA
NM_001037748_dup2	NA	NA
NM_001037748_dup3	NA	NA
NM_001037748_dup4	NA	NA
NM_001037748_dup5	NA	NA
NM_001037748_dup6	NA	NA
NM_001037748_dup7	NA	NA
NM_001037748_dup8	NA	NA
NM_001037749	0.5157	Lung
NM_001037751	1.0000	Spleen
NM_001037752	0.6397	Thymus
NM_001037754	0.4965	Hippocampus
NM_001037755	0.2455	Lung
NM_001037756	0.2583	Hippocampus
NM_001037757	0.2313	Spleen
NM_001037758	0.2938	Hippocampus
NM_001037759	0.3485	Thymus
NM_001037761	0.3372	Heart
NM_001037762	0.2262	Liver
NM_001037764	0.2868	Thymus
NM_001037800	0.6325	Spleen
NM_001037801	0.6072	Thymus
NM_001037809	0.3396	Thymus
NM_001037810	0.4274	Spleen
NM_001037812	0.2760	Lung
NM_001037822	0.6060	Spleen
NM_001037841	0.3938	Spleen
NM_001037842	0.4382	Lung
NM_001037846	0.2540	Thymus
NM_001037847	0.2463	Thymus
NM_001037848	0.4986	Thymus
NM_001037859	0.2669	Spleen
NM_001037863	0.3712	Liver
NM_001037865	0.4926	Lung
NM_001037877	0.2779	Hippocampus
NM_001037878	0.2142	Thymus
NM_001037905	0.3478	Lung
NM_001037906	0.8841	Hippocampus
NM_001037907	0.7117	Hippocampus
NM_001037909	0.4932	Spleen
NM_001037913	0.2176	Liver
NM_001037914	0.3436	Lung
NM_001037915	0.6845	Liver
NM_001037916	0.4226	Lung
NM_001037917	0.5430	Spleen
NM_001037918	0.2300	Liver
NM_001037919	0.6338	Spleen
NM_001037922	0.3958	Spleen
NM_001037923	0.2621	Lung
NM_001037925	NA	NA
NM_001037926	0.4759	Spleen
NM_001037927	0.4863	Lung
NM_001037928	0.3265	Lung
NM_001037929	0.4090	Spleen
NM_001037931	0.5237	Thymus
NM_001037932	0.8496	Liver
NM_001037933	0.5367	Lung
NM_001037937	0.3229	Liver
NM_001037938	0.2524	Liver
NM_001037939	0.6511	Liver
NM_001037940	0.2142	Thymus
NM_001037941	0.3422	Thymus
NM_001037955	0.2076	Lung
NM_001037957	0.2419	Thymus
NM_001037987	0.5416	Hippocampus
NM_001037997	0.2526	Lung
NM_001037999	0.2907	Lung
NM_001038010	0.2187	Hippocampus
NM_001038015	0.2257	Thymus
NM_001038018	0.2624	Thymus
NM_001038230	0.2595	Spleen
NM_001038231	0.2921	Spleen
NM_001038492	0.2422	Heart
NM_001038499	0.5473	Thymus
NM_001038500	1.0000	Thymus
NM_001038587	0.4028	Hippocampus
NM_001038589	0.5468	Hippocampus
NM_001038590	0.4054	Hippocampus
NM_001038592	0.2378	Hippocampus
NM_001038593	0.4776	Hippocampus
NM_001038594	0.5009	Hippocampus
NM_001038602	0.3452	Lung
NM_001038604	0.3261	Lung
NM_001038607	0.4544	Hippocampus
NM_001038608	0.2065	Thymus
NM_001038609	0.3660	Hippocampus
NM_001038610	0.4344	Lung
NM_001038612	0.4767	Hippocampus
NM_001038613	0.5488	Hippocampus
NM_001038614	0.4148	Hippocampus
NM_001038616	0.6822	Hippocampus
NM_001038619	0.5784	Hippocampus
NM_001038621	0.2497	Hippocampus
NM_001038624	0.5469	Hippocampus
NM_001038625	0.2211	Lung
NM_001038627	0.2475	Lung
NM_001038635	0.2400	Lung
NM_001038637	0.3227	Hippocampus
NM_001038641	0.2814	Thymus
NM_001038642	0.3237	Thymus
NM_001038643	0.2857	Lung
NM_001038651	0.3000	Thymus
NM_001038653	0.3489	Lung
NM_001038654	0.4947	Lung
NM_001038655	0.7264	Hippocampus
NM_001038658	0.6759	Hippocampus
NM_001038660	0.3239	Lung
NM_001038663	0.2228	Thymus
NM_001038664	0.2889	Lung
NM_001038676	0.6357	Spleen
NM_001038695	0.2592	Thymus
NM_001038696	0.2602	Thymus
NM_001038697	0.5013	Heart
NM_001038698	0.7845	Hippocampus
NM_001038699	0.2544	Thymus
NM_001038700	0.3093	Thymus
NM_001038701	0.8599	Hippocampus
NM_001038703	0.3214	Lung
NM_001038708	0.2695	Thymus
NM_001038710	0.5284	Hippocampus
NM_001038839	0.2976	Spleen
NM_001038845	0.2877	Lung
NM_001038846	0.2892	Thymus
NM_001038887	0.3270	Lung
NM_001038993	0.2382	Thymus
NM_001038995	0.2445	Thymus
NM_001038996	0.6935	Spleen
NM_001038997	0.6602	Thymus
NM_001038998	0.3434	Thymus
NM_001038999	0.3727	Hippocampus
NM_001039000	0.7739	Hippocampus
NM_001039038	0.6418	Lung
NM_001039039	0.2450	Lung
NM_001039042	0.6538	Lung
NM_001039045	0.2415	Spleen
NM_001039047	0.6752	Spleen
NM_001039048	0.7395	Heart
NM_001039049	1.0000	Thymus
NM_001039050	0.4154	Hippocampus
NM_001039051	0.5499	Spleen
NM_001039052	0.3952	Spleen
NM_001039053	0.3904	Spleen
NM_001039056	0.5225	Lung
NM_001039057	0.5719	Lung
NM_001039059	0.4887	Spleen
NM_001039060	0.4118	Thymus
NM_001039061	0.3081	Hippocampus
NM_001039071	0.6043	Heart
NM_001039072	0.6753	Heart
NM_001039073	0.2841	Hippocampus
NM_001039074	0.7447	Heart
NM_001039075	0.4448	Heart
NM_001039076	0.7055	Heart
NM_001039077	0.2565	Hippocampus
NM_001039078	0.2551	Hippocampus
NM_001039079	0.6108	Hippocampus
NM_001039080	0.4009	Lung
NM_001039081	0.2829	Thymus
NM_001039084	0.2610	Heart
NM_001039086	0.2913	Heart
NM_001039087	0.4294	Heart
NM_001039088	0.2219	Thymus
NM_001039089	0.2130	Hippocampus
NM_001039090	0.2317	Lung
NM_001039092	0.4287	Hippocampus
NM_001039093	0.2269	Thymus
NM_001039094	0.5572	Hippocampus
NM_001039095	1.0000	Thymus
NM_001039103	0.4423	Spleen
NM_001039104	0.4233	Lung
NM_001039105	0.6132	Lung
NM_001039106	0.3190	Hippocampus
NM_001039114	0.3298	Spleen
NM_001039115	0.2703	Hippocampus
NM_001039116	1.0000	Thymus
NM_001039118	0.5751	Thymus
NM_001039119	NA	NA
NM_001039120	0.6376	Spleen
NM_001039121	0.7516	Spleen
NM_001039122	0.4846	Spleen
NM_001039123	0.5015	Thymus
NM_001039124	0.3487	Spleen
NM_001039125	NA	NA
NM_001039126	0.2946	Lung
NM_001039128	1.0000	Thymus
NM_001039129	0.2370	Lung
NM_001039137	0.3017	Hippocampus
NM_001039138	0.2966	Hippocampus
NM_001039139	0.2372	Hippocampus
NM_001039143	0.4427	Spleen
NM_001039146	0.3861	Liver
NM_001039147	0.2831	Hippocampus
NM_001039149	0.3243	Spleen
NM_001039150	0.5439	Lung
NM_001039151	0.2965	Spleen
NM_001039153	0.2225	Hippocampus
NM_001039154	0.7668	Hippocampus
NM_001039155	0.7325	Hippocampus
NM_001039156	0.6137	Thymus
NM_001039157	0.3173	Spleen
NM_001039158	0.2550	Lung
NM_001039159	0.3369	Thymus
NM_001039160	0.4276	Spleen
NM_001039160_dup1	NA	NA
NM_001039162	0.2645	Lung
NM_001039167	0.7699	Hippocampus
NM_001039168	0.5493	Hippocampus
NM_001039169	0.2504	Thymus
NM_001039170	0.3356	Thymus
NM_001039173	0.8466	Hippocampus
NM_001039175	0.5629	Lung
NM_001039176	0.4726	Lung
NM_001039179	0.3292	Hippocampus
NM_001039180	0.2372	Thymus
NM_001039181	0.4818	Lung
NM_001039184	0.2416	Thymus
NM_001039185	0.3083	Liver
NM_001039186	0.4156	Liver
NM_001039187	0.4020	Liver
NM_001039188	0.2390	Liver
NM_001039189	0.4678	Lung
NM_001039192	0.3825	Thymus
NM_001039194	0.2622	Heart
NM_001039195	0.8935	Hippocampus
NM_001039198	0.3339	Hippocampus
NM_001039200	0.2163	Lung
NM_001039201	0.2851	Hippocampus
NM_001039202	0.4150	Hippocampus
NM_001039209	0.2905	Heart
NM_001039214	0.2374	Thymus
NM_001039218	1.0000	Thymus
NM_001039219	0.3857	Spleen
NM_001039220	0.3055	Lung
NM_001039222	NA	NA
NM_001039223	0.3158	Thymus
NM_001039228	0.3493	Hippocampus
NM_001039231	0.2829	Spleen
NM_001039238	0.6702	Thymus
NM_001039239	0.3365	Thymus
NM_001039240	0.5137	Lung
NM_001039242	0.4953	Hippocampus
NM_001039243	0.4211	Hippocampus
NM_001039244	0.3053	Heart
NM_001039347	0.4818	Hippocampus
NM_001039351	0.3244	Thymus
NM_001039352	0.2783	Lung
NM_001039353	0.2578	Thymus
NM_001039354	0.4038	Hippocampus
NM_001039356	0.3532	Hippocampus
NM_001039363	0.2156	Spleen
NM_001039364	0.4342	Spleen
NM_001039365	0.9188	Hippocampus
NM_001039368	0.2547	Lung
NM_001039371	0.2742	Lung
NM_001039373	0.2763	Thymus
NM_001039376	0.3070	Hippocampus
NM_001039385	0.8553	Hippocampus
NM_001039386	0.5427	Hippocampus
NM_001039387	0.3148	Liver
NM_001039388	0.4796	Hippocampus
NM_001039389	0.2798	Hippocampus
NM_001039390	0.2850	Spleen
NM_001039391	0.2466	Spleen
NM_001039392	0.2963	Lung
NM_001039394	0.2307	Spleen
NM_001039466	0.3952	Hippocampus
NM_001039472	0.3455	Thymus
NM_001039474	0.2351	Thymus
NM_001039475	0.4679	Lung
NM_001039478	0.2515	Spleen
NM_001039482	0.2364	Thymus
NM_001039483	0.2094	Liver
NM_001039484	0.4319	Hippocampus
NM_001039485	0.6278	Lung
NM_001039488	0.2516	Thymus
NM_001039493	0.2736	Spleen
NM_001039494	0.3999	Thymus
NM_001039495	0.6657	Lung
NM_001039501	0.6738	Lung
NM_001039502	0.6445	Spleen
NM_001039507	0.2590	Heart
NM_001039509	0.4433	Hippocampus
NM_001039510	0.4844	Hippocampus
NM_001039511	0.2569	Heart
NM_001039512	0.3801	Heart
NM_001039514	0.2136	Hippocampus
NM_001039515	0.4083	Hippocampus
NM_001039518	0.2605	Lung
NM_001039519	0.2252	Thymus
NM_001039520	0.2242	Thymus
NM_001039521	0.2084	Thymus
NM_001039522	0.2328	Thymus
NM_001039530	0.2476	Spleen
NM_001039532	0.2078	Lung
NM_001039533	0.2132	Lung
NM_001039534	0.2476	Heart
NM_001039536	0.2234	Thymus
NM_001039537	0.4465	Lung
NM_001039543	0.8149	Heart
NM_001039544	0.6175	Liver
NM_001039545	0.3579	Spleen
NM_001039546	0.2639	Lung
NM_001039551	0.3699	Hippocampus
NM_001039552	0.2092	Spleen
NM_001039553	0.3170	Spleen
NM_001039554	0.3060	Lung
NM_001039555	0.7599	Liver
NM_001039556	0.4826	Thymus
NM_001039557	0.4120	Hippocampus
NM_001039558	0.5891	Hippocampus
NM_001039560	0.2987	Thymus
NM_001039562	0.2264	Lung
NM_001039563	0.4965	Lung
NM_001039566	0.3556	Thymus
NM_001039578	0.2813	Hippocampus
NM_001039581	0.2673	Lung
NM_001039586	0.4738	Liver
NM_001039593	0.2842	Lung
NM_001039594	0.4760	Thymus
NM_001039595	0.4347	Thymus
NM_001039644	0.2267	Lung
NM_001039645	0.6572	Hippocampus
NM_001039646	0.2915	Liver
NM_001039647	0.3173	Liver
NM_001039652	0.7245	Hippocampus
NM_001039653	0.4929	Hippocampus
NM_001039655	0.7395	Hippocampus
NM_001039657	0.4669	Heart
NM_001039658	0.3374	Spleen
NM_001039666	1.0000	Thymus
NM_001039669	0.3972	Spleen
NM_001039676	0.3641	Lung
NM_001039678	0.8563	Liver
NM_001039683	0.4932	Spleen
NM_001039684	0.2703	Spleen
NM_001039688	0.7719	Thymus
NM_001039689	0.7315	Thymus
NM_001039692	0.2242	Lung
NM_001039695	0.6016	Thymus
NM_001039696	0.4902	Thymus
NM_001039698	0.8258	Thymus
NM_001039700	0.4410	Spleen
NM_001039701	0.2997	Thymus
NM_001039710	0.2193	Lung
NM_001039720	0.7667	Liver
NM_001039723	0.2933	Thymus
NM_001039824	0.2133	Hippocampus
NM_001039878	0.2386	Spleen
NM_001039889	0.5580	Spleen
NM_001039934	0.3331	Hippocampus
NM_001039939	0.2422	Thymus
NM_001039941	1.0000	Spleen
NM_001039942	NA	NA
NM_001039943	1.0000	Spleen
NM_001039944	NA	NA
NM_001039951	0.3253	Thymus
NM_001039959	0.4400	Lung
NM_001039965	0.2246	Spleen
NM_001039967	0.2721	Lung
NM_001040026	0.2361	Heart
NM_001040027	NA	NA
NM_001040055	0.5364	Spleen
NM_001040072	0.3279	Lung
NM_001040085	0.3683	Lung
NM_001040086	0.4703	Lung
NM_001040087	0.5894	Hippocampus
NM_001040088	0.3487	Lung
NM_001040089	0.6745	Spleen
NM_001040106	0.3012	Hippocampus
NM_001040111	0.3340	Spleen
NM_001040112	0.2767	Lung
NM_001040130	0.2594	Heart
NM_001040131	0.2398	Thymus
NM_001040136	0.3464	Liver
NM_001040137	0.3189	Heart
NM_001040187	0.2365	Thymus
NM_001040395	0.2463	Liver
NM_001040396	0.1938	Hippocampus
NM_001040397	0.6699	Heart
NM_001040399	0.2509	Liver
NM_001040400	0.2170	Hippocampus
NM_001040403	0.2108	Lung
NM_001040426	0.4932	Lung
NM_001040434	0.3488	Hippocampus
NM_001040435	0.3746	Thymus
NM_001040459	0.4080	Lung
NM_001040461	0.3997	Hippocampus
NM_001040611	0.5265	Hippocampus
NM_001040631	0.5200	Hippocampus
NM_001040632	0.3239	Lung
NM_001040654	0.4823	Lung
NM_001040669	0.8410	Spleen
NM_001040682	0.3419	Hippocampus
NM_001040683	0.2280	Thymus
NM_001040684	0.3938	Liver
NM_001040686	0.2796	Spleen
NM_001040689	0.8055	Lung
NM_001040690	0.2187	Thymus
NM_001040691	0.4648	Thymus
NM_001040692	1.0000	Thymus
NM_001040695	0.2177	Thymus
NM_001040696	0.3446	Spleen
NM_001040699	0.4621	Hippocampus
NM_001040700	0.7197	Lung
NM_001042407	0.2347	Heart
NM_001042408	0.3746	Spleen
NM_001042411	0.2763	Lung
NM_001042418	0.2327	Spleen
NM_001042419	0.2733	Hippocampus
NM_001042420	0.3157	Hippocampus
NM_001042421	0.4848	Thymus
NM_001042438	0.2249	Lung
NM_001042451	0.3971	Hippocampus
NM_001042484	0.2169	Spleen
NM_001042485	0.2462	Liver
[truncated: 24,211 more rows]
