# Supplementary material for: Comprehensive Characterization of 10,571 Mouse Large Intergenic Noncoding RNAs from Whole Transcriptome Sequencing
Source: PLoS One. 2013 Aug 12;8(8):e70835. doi: 10.1371/journal.pone.0070835 (PMC3741367; doi:10.1371/journal.pone.0070835)
Supplement: Dataset S4 — The orthologous regions of mouse lincRNAs in the human genome. (XLS) [file pone.0070835.s012.xls]

chromosom name (mm9)	start (mm9)	end (mm9)	lincRNA name	chromosom name (hg19)	start (hg19)	end (hg19)	Transmap orthologous
chr1	3063333	3064403	KnowTID_00000001	chr8	56535074	56535248	N
chr1	4105759	4109981	NovelTID_00000215	chr8	55682491	55683988	Y
chr1	4486631	4489459	KnowTID_00000003	chr8	55364183	55367391	N
chr1	4573209	4576333	KnowTID_00000387	chr8	55279687	55280530	N
chr1	4775858	4776711	KnowTID_00000004	chr8	55046815	55047728	Y
chr1	6396070	6407478	NovelTID_00000216	chr8	53397611	53409438	N
chr1	6851317	6854232	KnowTID_00000390	chr8	53020393	53023040	N
chr1	7339486	7387950	KnowTID_00000391	chr7	92601854	92624206	N
chr1	7351805	7352932	KnowTID_00000392	chr7	92615651	92616425	N
chr1	7365968	7387950	KnowTID_00000393	chr7	92546395	92557666	N
chr1	7368767	7371470	KnowTID_00000394	chr7	92602849	92604094	N
chr1	7372088	7387959	KnowTID_00000395	chr7	92546395	92557666	N
chr1	7488048	7508230	KnowTID_00000008	chr8	52455564	52505114	N
chr1	9629335	9630663	KnowTID_00000009	chr8	67446584	67447711	N
chr1	10772536	10774458	KnowTID_00000396	chr8	68706830	68707922	N
chr1	10870353	10872206	KnowTID_00000010	chr8	68767049	68777470	N
chr1	12657643	12663171	KnowTID_00000011	chr8	70356940	70361515	N
chr1	13068526	13068823	KnowTID_00000012	chr8	70891744	70891932	N
chr1	13417527	13419396	KnowTID_00000013	chr8	71357988	71359629	N
chr1	13836951	13839200	KnowTID_00000400	chr8	71848676	71851178	N
chr1	14099295	14102900	KnowTID_00000014	chr8	72055129	72056626	N
chr1	14778725	14783046	KnowTID_00000015	chr8	72831040	72836399	N
chr1	15784873	15786719	KnowTID_00000016	chr8	73909187	73909883	N
chr1	15836645	15838289	KnowTID_00000401	chr8	73963198	73963891	N
chr1	15837503	15838648	KnowTID_00000017	chr8	73963198	73964283	N
chr1	16985013	16987544	NovelTID_00000003	chr8	75146928	75149442	Y
chr1	17088719	17090873	KnowTID_00000020	chr8	75234509	75236957	N
chr1	17158485	17163184	KnowTID_00000021	chr8	75291150	75296398	N
chr1	17158493	17163181	KnowTID_00000022	chr8	75291150	75296395	N
chr1	18000546	18002026	KnowTID_00000404	chr2	29045869	29047046	N
chr1	19695406	19697412	NovelTID_00000004	chr6	51153991	51154683	N
chr1	20878730	20880554	KnowTID_00000405	chr6	52225169	52226824	N
chr1	21156578	21177708	KnowTID_00000025	chr6	52670280	52684095	Y
chr1	21224802	21226902	KnowTID_00000026	chr6	52734379	52735520	N
chr1	23269067	23271590	KnowTID_00000027	chr6	72121581	72124009	N
chr1	23284671	23285852	KnowTID_00000028	chr6	72104339	72105205	N
chr1	23398587	23404611	KnowTID_00000406	chr6	71988806	71990476	N
chr1	23452038	23454011	NovelTID_00000218	chr6	71948507	71957273	N
chr1	23543100	23545569	NovelTID_00000219	chr6	71868072	71870242	N
chr1	23581051	23583614	NovelTID_00000005	chr6	71815772	71818132	N
chr1	24107463	24110263	KnowTID_00000029	chr6	71118896	71122835	N
chr1	24621717	24621931	KnowTID_00000030	chrM	8059	8295	Y
chr1	24621717	24622407	KnowTID_00000407	chrM	7584	8295	Y
chr1	24622548	24622811	KnowTID_00000031	chrM	7182	7440	Y
chr1	25020053	25021821	KnowTID_00000408	chr6	70201664	70203223	N
chr1	26707038	26708175	KnowTID_00000410	chr6	68662024	68664090	N
chr1	27940890	27959032	KnowTID_00000034	chr6	67358977	67383960	N
chr1	30177858	30179746	NovelTID_00000220	chr6	65017888	65019439	N
chr1	30235724	30237558	NovelTID_00000221	chr6	64963248	64964382	N
chr1	30510626	30511230	NovelTID_00000222	chr6	64761882	64762011	N
chr1	30673688	30677228	KnowTID_00000035	chr6	64608458	64611000	N
chr1	30827134	30827640	KnowTID_00000036	chr16	89759819	89761196	Y
chr1	30932285	30935067	KnowTID_00000037	chr6	64342403	64344060	N
chr1	31006824	31007031	KnowTID_00000038	chr6	64281762	64281995	Y
chr1	31076032	31153299	KnowTID_00000413	chr6	64166663	64239133	Y
chr1	32716426	32748804	NovelTID_00000006	chr6	62362987	62388855	N
chr1	32716426	32748804	NovelTID_00000007	chr6	62362987	62388855	N
chr1	32716426	32761271	NovelTID_00000008	chr6	62346806	62388855	N
chr1	32716426	32761271	NovelTID_00000009	chr6	62346806	62388855	N
chr1	32716426	32761978	NovelTID_00000010	chr6	62346170	62388855	N
chr1	32716426	32761978	NovelTID_00000011	chr6	62346170	62388855	N
chr1	32716426	32761978	NovelTID_00000012	chr6	62346170	62388855	N
chr1	32716426	32761978	NovelTID_00000013	chr6	62346170	62388855	N
chr1	32767023	32769493	KnowTID_00000039	chr6	62340145	62342236	N
chr1	33024328	33029335	KnowTID_00000414	chr6	58013822	58015151	N
chr1	33728761	33731072	KnowTID_00000415	chr6	57177944	57180005	N
chr1	34395025	34397267	KnowTID_00000416	chr6	56277582	56279548	N
chr1	34534219	34542456	KnowTID_00000418	chr2	131144289	131145603	N
chr1	35203242	35204413	NovelTID_00000225	chr2	130368581	130368714	N
chr1	35936689	35937964	KnowTID_00000040	chr2	129252024	129252205	N
chr1	35938182	35940310	NovelTID_00000231	chr2	129249033	129249813	N
chr1	36059863	36060666	KnowTID_00000420	chr2	129127317	129128183	N
chr1	36086491	36087863	KnowTID_00000421	chr2	129105221	129106584	N
chr1	36426112	36448379	NovelTID_00000233	chr2	97304191	97337683	Y
chr1	36518814	36528290	NovelTID_00000015	chr2	97420144	97426484	N
chr1	36518814	36528290	NovelTID_00000016	chr2	97420144	97426484	N
chr1	36522416	36526463	NovelTID_00000234	chr2	97421712	97424786	N
chr1	36522416	36528342	NovelTID_00000235	chr2	97421712	97426535	N
chr1	36523486	36528342	NovelTID_00000236	chr2	97422047	97426535	N
chr1	36771390	36771783	KnowTID_00000044	chr2	98286184	98286575	Y
chr1	36772438	36782529	NovelTID_00000237	chr2	98287913	98292555	N
chr1	36795892	36801637	KnowTID_00000422	chr2	98313896	98317817	Y
chr1	36997313	36999413	NovelTID_00000238	chr2	98613482	98614708	N
chr1	37356196	37356542	KnowTID_00000424	chr2	99060529	99061011	N
chr1	37799051	37801607	NovelTID_00000017	chr2	99573564	99576319	N
chr1	37922143	37928233	KnowTID_00000045	chr2	99758079	99769244	Y
chr1	38188927	38216737	KnowTID_00000046	chr2	100109209	100145052	N
chr1	38824028	38824531	KnowTID_00000047	chr2	100856133	100856653	N
chr1	39042434	39044532	KnowTID_00000425	chr2	101177974	101179348	Y
chr1	39105492	39114482	KnowTID_00000426	chr2	101273258	101287453	N
chr1	39899272	39904175	KnowTID_00000427	chr2	102239362	102242195	N
chr1	39899272	39904175	KnowTID_00000428	chr2	102239362	102242195	N
chr1	40105883	40107213	KnowTID_00000429	chr2	102563113	102564286	N
chr1	40224308	40224953	NovelTID_00000019	chr2	102677506	102677673	N
chr1	40737425	40738304	KnowTID_00000430	chr2	103234914	103235888	N
chr1	41224404	41238097	KnowTID_00000431	chr2	103794053	103799511	N
chr1	42318411	42342479	NovelTID_00000020	chr2	105050542	105071108	Y
chr1	42318626	42342694	NovelTID_00000021	chr2	105050764	105071108	Y
chr1	42318626	42360695	NovelTID_00000022	chr2	105050764	105093579	Y
chr1	42318626	42363517	NovelTID_00000023	chr2	105050764	105097327	Y
chr1	42318626	42363517	NovelTID_00000024	chr2	105050764	105097327	Y
chr1	42591100	42593220	KnowTID_00000048	chr2	105313835	105315431	N
chr1	42749876	42751670	KnowTID_00000433	chr2	105467825	105469647	Y
chr1	42763916	42764897	KnowTID_00000434	chr2	105481943	105482785	Y
chr1	42763988	42769506	KnowTID_00000435	chr2	105482011	105487893	Y
chr1	42763988	42770553	KnowTID_00000436	chr2	105482011	105489073	Y
chr1	42807556	42809726	KnowTID_00000049	chr2	105524951	105526284	N
chr1	43253826	43273438	KnowTID_00000050	chr2	106055186	106075121	N
chr1	43307000	43359772	KnowTID_00000437	chr2	106114551	106196830	N
chr1	43715530	43724582	NovelTID_00000240	chr2	106584160	106589615	N
chr1	44523456	44525570	KnowTID_00000438	chr2	189094866	189097799	N
chr1	45824584	45827047	KnowTID_00000052	chr14	20145926	20149098	N
chr1	46934047	46937917	KnowTID_00000440	chr2	196485512	196490532	N
chr1	47490667	47492609	KnowTID_00000441	chr2	196001472	196002242	N
chr1	49022811	49024216	KnowTID_00000442	chr2	194878223	194878394	N
chr1	50800230	50800839	NovelTID_00000243	chr2	193202450	193202652	N
chr1	51252064	51254590	KnowTID_00000056	chr2	192802164	192804583	N
chr1	51390214	51400123	NovelTID_00000026	chr2	192667245	192677806	N
chr1	51514777	51515775	KnowTID_00000443	chr2	192567456	192569299	N
chr1	51563929	51569173	KnowTID_00000444	chr2	192504116	192509762	N
chr1	51563929	51653562	KnowTID_00000445	chr2	192431684	192509762	N
chr1	51583848	51586213	KnowTID_00000446	chr2	192488899	192490813	N
chr1	52388667	52395009	KnowTID_00000057	chr2	191650557	191656302	N
chr1	52570224	52572152	NovelTID_00000027	chr2	191502418	191507239	N
chr1	52570224	52577372	NovelTID_00000028	chr2	191495787	191507239	N
chr1	52570224	52577372	NovelTID_00000029	chr2	191495787	191507239	N
chr1	52579742	52639517	KnowTID_00000059	chr2	191438776	191492066	N
chr1	52626857	52637136	KnowTID_00000447	chr2	191441689	191450948	N
chr1	53754873	53763628	KnowTID_00000448	chr2	196915821	196933534	Y
chr1	53848044	53849499	KnowTID_00000060	chr2	197040840	197042138	Y
chr1	55299045	55300659	KnowTID_00000061	chr2	198575672	198576778	N
chr1	55301192	55302698	KnowTID_00000062	chr2	198578586	198580255	N
chr1	55931358	55933994	NovelTID_00000245	chr2	199161744	199169317	N
chr1	55948920	55972689	KnowTID_00000063	chr2	199180711	199203753	N
chr1	55988084	56029172	KnowTID_00000064	chr2	199212943	199253189	N
chr1	56017757	56029172	KnowTID_00000065	chr2	199239760	199253189	N
chr1	56075821	56077047	KnowTID_00000066	chr2	199305951	199306763	N
chr1	56588667	56590720	KnowTID_00000067	chr2	199825804	199827759	N
chr1	57184183	57186245	KnowTID_00000068	chr2	200502494	200512712	Y
chr1	57257488	57271840	KnowTID_00000449	chr2	200599705	200613748	N
chr1	57383621	57384640	NovelTID_00000247	chr2	200712494	200713436	N
chr1	57416065	57434388	KnowTID_00000450	chr2	200761330	200775922	N
chr1	57416115	57433724	KnowTID_00000451	chr2	200761382	200774770	N
chr1	57416115	57434365	KnowTID_00000452	chr2	200761382	200775899	N
chr1	57577674	57580486	KnowTID_00000453	chr2	200939017	200940755	N
chr1	57746621	57815559	NovelTID_00000248	chr2	201095339	201157876	N
chr1	59294144	59294597	NovelTID_00000249	chr2	202645761	202646205	N
chr1	59294213	59295863	NovelTID_00000030	chr2	202645840	202648309	N
chr1	59443548	59448438	NovelTID_00000031	chr2	202797466	202802824	N
chr1	59465447	59474562	NovelTID_00000250	chr2	202824140	202831554	N
chr1	59469292	59475750	NovelTID_00000251	chr2	202825637	202832604	N
chr1	59504708	59506346	KnowTID_00000457	chr2	202859763	202861417	N
chr1	59545323	59549449	KnowTID_00000458	chr2	202904593	202907502	N
chr1	59562534	59564063	NovelTID_00000034	chr15	88521242	88522401	N
chr1	59773381	59775888	KnowTID_00000070	chr2	203174906	203175999	N
chr1	59819875	59821115	KnowTID_00000459	chr2	203240479	203241823	Y
chr1	59930312	59932700	KnowTID_00000071	chr2	203427708	203430674	Y
chr1	59933714	59935858	KnowTID_00000072	chr2	203431709	203434260	Y
chr1	60126628	60129954	KnowTID_00000460	chr2	190671423	190674712	N
chr1	60651650	60653080	KnowTID_00000462	chr2	204428208	204429407	N
chr1	60655028	60656297	NovelTID_00000252	chr2	204431891	204433037	N
chr1	60867935	60872311	NovelTID_00000035	chr2	204630723	204632898	N
chr1	60867935	60913800	NovelTID_00000036	chr2	204630723	204675890	N
chr1	60867935	60937148	NovelTID_00000037	chr2	204630723	204700802	N
chr1	60882685	60903515	NovelTID_00000253	chr2	204651618	204668707	N
chr1	60937181	60938582	KnowTID_00000073	chr2	204700835	204702322	N
chr1	61007546	61008274	NovelTID_00000254	chr2	204767869	204768004	N
chr1	61030612	61034718	NovelTID_00000038	chr2	204798231	204801452	N
chr1	61030710	61032308	NovelTID_00000039	chr2	204798315	204799437	N
chr1	61587738	61593699	NovelTID_00000040	chr2	205334856	205341324	N
chr1	62696069	62697267	NovelTID_00000255	chr2	206495288	206495830	N
chr1	62745446	62747073	NovelTID_00000256	chr2	206542693	206543843	N
chr1	62867928	62878944	KnowTID_00000463	chr2	206665081	206675854	N
chr1	62889232	62906011	NovelTID_00000257	chr2	206683041	206699776	N
chr1	62930837	62931880	NovelTID_00000041	chr2	206712398	206713731	N
chr1	62953853	62983445	NovelTID_00000258	chr2	206722306	206760558	N
chr1	63304006	63305837	KnowTID_00000074	chr2	207125742	207126064	N
chr1	63304006	63312979	KnowTID_00000075	chr2	207125742	207131303	N
chr1	64232564	64349617	KnowTID_00000465	chr2	208083823	208197491	N
chr1	64527481	64528808	KnowTID_00000466	chr2	208359360	208363856	N
chr1	64563427	64565191	NovelTID_00000042	chr2	208380729	208381256	N
chr1	64563631	64564415	NovelTID_00000043	chr2	208380729	208381024	N
chr1	64667098	64669330	KnowTID_00000076	chr2	208494283	208495613	Y
chr1	64785084	64787181	KnowTID_00000077	chr2	208635740	208638557	N
chr1	65483474	65486193	KnowTID_00000467	chr7	65413656	65421137	Y
chr1	67142863	67150887	NovelTID_00000259	chr2	211398480	211406439	N
chr1	67142863	67163083	NovelTID_00000260	chr2	211398480	211413659	N
chr1	67142863	67163083	NovelTID_00000261	chr2	211398480	211413659	N
chr1	67147274	67163083	NovelTID_00000262	chr2	211402937	211413659	N
chr1	67147274	67163083	NovelTID_00000263	chr2	211402937	211413659	N
chr1	67155128	67163083	NovelTID_00000264	chr2	211408706	211413659	N
chr1	67155128	67163083	NovelTID_00000265	chr2	211408706	211413659	N
chr1	69476213	69478849	NovelTID_00000266	chr2	213766607	213768576	N
chr1	69487629	69490658	KnowTID_00000079	chr2	213777621	213779660	Y
chr1	69536930	69540362	KnowTID_00000469	chr2	213822147	213824684	N
chr1	69815532	69835841	NovelTID_00000044	chr2	214097973	214115375	N
chr1	69817441	69819327	KnowTID_00000470	chr2	214099994	214101804	N
chr1	71731244	71739412	NovelTID_00000045	chr2	216330257	216338977	N
chr1	71889663	71893184	KnowTID_00000471	chr2	216486921	216490207	Y
chr1	71934685	71937778	KnowTID_00000080	chr2	216525591	216527396	N
chr1	71934685	71937778	KnowTID_00000081	chr2	216525591	216527396	N
chr1	71940641	71963699	KnowTID_00000472	chr2	216530003	216550460	N
chr1	71981293	71985197	NovelTID_00000267	chr2	216574510	216578123	N
chr1	72153728	72168575	KnowTID_00000473	chr2	216768850	216783376	N
chr1	72603122	72604765	KnowTID_00000082	chr2	217252909	217255826	N
chr1	72617085	72623084	NovelTID_00000268	chr2	217262588	217270410	N
chr1	72776761	72781862	NovelTID_00000269	chr2	217395063	217399967	N
chr1	72791732	72802500	NovelTID_00000270	chr2	217412671	217424353	N
chr1	72791732	72802500	NovelTID_00000271	chr2	217412671	217424353	N
chr1	72796739	72802500	NovelTID_00000272	chr2	217417720	217424353	N
chr1	72797019	72802500	NovelTID_00000273	chr2	217418071	217424353	N
chr1	72809575	72816305	NovelTID_00000274	chr2	217429565	217433868	N
chr1	72809575	72819382	NovelTID_00000275	chr2	217429565	217437439	N
chr1	72809744	72819418	NovelTID_00000276	chr2	217429716	217437477	N
chr1	72814700	72816305	NovelTID_00000277	chr6	111216232	111216707	N
chr1	72983409	72985550	NovelTID_00000046	chr2	217623691	217625764	N
chr1	72983472	72984318	NovelTID_00000047	chr2	217623767	217624645	N
chr1	72983566	72984163	NovelTID_00000048	chr2	217623862	217624645	N
chr1	73010359	73019747	KnowTID_00000084	chr2	217657198	217671462	N
chr1	73064718	73065452	KnowTID_00000474	chr2	217727163	217727754	N
chr1	73069058	73069453	KnowTID_00000475	chr2	217731047	217731918	Y
chr1	73092431	73093921	NovelTID_00000278	chr2	217756454	217757594	N
chr1	73253463	73255997	KnowTID_00000476	chr2	217946609	217948762	N
chr1	73437958	73454143	KnowTID_00000477	chr2	218147226	218164164	Y
chr1	73441907	73454143	KnowTID_00000478	chr2	218150924	218164164	Y
chr1	73445541	73477353	KnowTID_00000085	chr2	218154412	218185870	Y
chr1	73568670	73572034	KnowTID_00000479	chr2	218285082	218288817	N
chr1	73572408	73575549	NovelTID_00000279	chr2	218289081	218290277	Y
chr1	73664661	73790523	KnowTID_00000480	chr2	218374985	218486843	N
chr1	74863594	74872492	NovelTID_00000049	chr2	219773830	219776426	N
chr1	74863665	74874592	NovelTID_00000050	chr2	219773929	219776426	N
chr1	75000825	75002415	KnowTID_00000086	chr2	219928406	219929270	N
chr1	75933257	75952418	NovelTID_00000051	chr2	220871081	220884481	N
chr1	76481085	76506589	NovelTID_00000280	chr2	221368509	221393741	N
chr1	76485707	76498603	KnowTID_00000088	chr2	221373333	221385313	N
chr1	76485707	76498603	KnowTID_00000089	chr2	221373333	221385313	N
chr1	76510210	76526519	NovelTID_00000052	chr2	221397622	221416782	N
chr1	76887046	77024367	KnowTID_00000481	chr2	221764997	221914930	N
chr1	77543651	77553490	NovelTID_00000053	chr2	222472445	222482744	N
chr1	77601295	77618682	NovelTID_00000054	chr2	222525032	222532859	N
chr1	77642555	77659678	NovelTID_00000281	chr2	222560974	222575172	N
chr1	77768397	77803618	NovelTID_00000282	chr2	222700900	222739112	N
chr1	77856429	77892874	NovelTID_00000283	chr2	222796224	222833857	N
chr1	80221618	80225367	KnowTID_00000091	chr2	225281677	225297407	N
chr1	80232979	80244015	KnowTID_00000092	chr2	225303591	225319217	N
chr1	80251605	80252772	KnowTID_00000483	chr2	225327541	225327688	N
chr1	80442506	80472235	KnowTID_00000093	chr2	225565629	225595286	N
chr1	81516912	81519545	KnowTID_00000484	chr2	226758786	226761988	N
chr1	82101754	82103558	KnowTID_00000094	chr2	227460330	227462509	N
chr1	82802997	82804043	KnowTID_00000485	chr2	228298931	228299941	N
chr1	82903478	82907429	KnowTID_00000095	chr2	228451125	228452635	N
chr1	82909899	82910705	KnowTID_00000096	chr2	228463546	228464403	N
chr1	82951760	82952588	KnowTID_00000487	chr2	228478882	228479622	N
chr1	82956797	82957706	KnowTID_00000098	chr2	228482152	228482945	Y
chr1	83038099	83039055	KnowTID_00000488	chr2	228588597	228589536	N
chr1	83054860	83055950	KnowTID_00000489	chr2	228610542	228611190	Y
chr1	83054860	83055950	KnowTID_00000490	chr2	228610542	228611190	Y
chr1	83057504	83058496	KnowTID_00000099	chr2	228610543	228611772	N
chr1	83423170	83423973	KnowTID_00000491	chr2	229075917	229086472	N
chr1	83840176	83908146	KnowTID_00000492	chr2	229684042	229750053	N
chr1	83840176	83908219	KnowTID_00000493	chr2	229684042	229750053	N
chr1	84954756	84956626	NovelTID_00000284	chr2	230989289	230990859	N
chr1	84987104	84989255	KnowTID_00000494	chr2	231041333	231042557	N
chr1	87467464	87471479	NovelTID_00000286	chr2	231024514	231025090	N
chr1	87783400	87789319	NovelTID_00000287	chr2	231717476	231722626	N
chr1	87868939	87883492	KnowTID_00000495	chr2	231800858	231819088	N
chr1	88387060	88389842	NovelTID_00000056	chr2	232530057	232532428	N
chr1	88417734	88418940	KnowTID_00000496	chr2	232563807	232566611	N
chr1	88429179	88432516	NovelTID_00000288	chr2	232580181	232582810	N
chr1	88534775	88537029	KnowTID_00000100	chr2	232757800	232758109	N
chr1	89350281	89352509	KnowTID_00000101	chr2	233725999	233726762	N
chr1	89503379	89507545	NovelTID_00000057	chr2	233914127	233916626	N
chr1	90325447	90359201	NovelTID_00000289	chr2	234991279	235042136	Y
chr1	90325447	90359201	NovelTID_00000290	chr2	234991279	235042136	Y
chr1	90325447	90359667	NovelTID_00000291	chr2	234991279	235042617	Y
chr1	90340553	90359201	NovelTID_00000292	chr2	235016367	235042136	N
chr1	90340553	90359201	NovelTID_00000293	chr2	235016367	235042136	N
chr1	90340553	90359201	NovelTID_00000294	chr2	235016367	235042136	N
chr1	90340553	90359201	NovelTID_00000295	chr2	235016367	235042136	N
chr1	90340553	90359667	NovelTID_00000296	chr2	235016367	235042617	N
chr1	90340553	90359667	NovelTID_00000297	chr2	235016367	235042617	N
chr1	90448091	90458742	KnowTID_00000102	chr2	235186700	235197311	N
chr1	90456441	90458742	KnowTID_00000103	chr2	235194689	235197311	N
chr1	90549659	90551420	KnowTID_00000104	chr2	235332644	235334563	N
chr1	90551823	90555036	NovelTID_00000058	chr2	235335073	235346695	N
chr1	90899027	90912594	NovelTID_00000298	chr2	235772126	235783588	N
chr1	90912687	90918785	KnowTID_00000106	chr2	235784746	235790189	N
chr1	91154082	91154703	NovelTID_00000059	chr2	236110189	236110261	N
chr1	91256921	91302708	KnowTID_00000497	chr2	236245658	236311131	N
chr1	92050202	92056037	KnowTID_00000107	chr2	237417033	237424467	N
chr1	92123734	92125101	KnowTID_00000498	chr2	237504413	237506515	N
chr1	92152597	92156798	NovelTID_00000299	chr2	237545263	237554091	N
chr1	92177032	92180487	KnowTID_00000109	chr2	237586197	237590160	N
chr1	92234537	92270632	NovelTID_00000060	chr2	237657053	237699080	Y
chr1	92234537	92334417	NovelTID_00000061	chr2	237657053	237779260	N
chr1	92417070	92419872	KnowTID_00000110	chr2	237896017	237898290	N
chr1	92655213	92657064	KnowTID_00000111	chr2	238230410	238230847	N
chr1	92767159	92767996	KnowTID_00000500	chr2	238344473	238345235	N
chr1	93134760	93137931	KnowTID_00000501	chr2	238864014	238864601	N
chr1	93301455	93302606	KnowTID_00000502	chr2	239135747	239136553	Y
chr1	93379600	93381351	KnowTID_00000113	chr2	239218305	239218548	N
chr1	93507981	93510107	NovelTID_00000301	chr2	239467797	239472337	N
chr1	93812836	93816128	KnowTID_00000114	chr2	239941896	239946856	N
chr1	94144259	94146441	NovelTID_00000302	chr2	240422082	240424055	N
chr1	94233889	94238757	NovelTID_00000303	chr2	240625921	240626953	N
chr1	94246473	94248471	NovelTID_00000064	chr2	240630818	240634717	N
chr1	94276237	94290201	NovelTID_00000065	chr2	240692857	240721342	N
chr1	94284536	94290201	NovelTID_00000066	chr2	240713677	240721342	N
chr1	94586642	94627327	NovelTID_00000304	chr2	241168000	241226194	N
chr1	94586642	94627327	NovelTID_00000305	chr2	241168000	241226194	N
chr1	94607328	94614055	NovelTID_00000067	chr2	241186771	241195688	N
chr1	94609733	94613774	NovelTID_00000306	chr2	241191569	241195688	N
chr1	94610614	94627327	NovelTID_00000307	chr2	241192550	241226194	N
chr1	94610614	94627327	NovelTID_00000308	chr2	241192550	241226194	N
chr1	94612089	94614203	NovelTID_00000068	chr2	241193955	241195688	N
chr1	95019468	95020630	NovelTID_00000309	chr2	241778969	241779402	N
chr1	95022410	95025427	NovelTID_00000310	chr2	241789819	241790717	N
chr1	95097808	95098366	NovelTID_00000069	chr2	241888349	241888959	N
chr1	96694018	96699049	KnowTID_00000116	chr5	99338671	99353039	N
chr1	97363785	97366510	KnowTID_00000117	chr5	100059611	100061059	N
chr1	97478719	97480996	KnowTID_00000504	chr5	100138954	100139740	N
chr1	97479626	97481937	KnowTID_00000505	chr5	100139700	100140122	N
chr1	97597760	97613095	KnowTID_00000506	chr5	100284351	100303734	N
chr1	97887235	97918335	KnowTID_00000507	chr5	100615436	100657868	N
chr1	98439635	98453280	KnowTID_00000508	chr5	101266168	101286484	N
chr1	98768797	98777807	KnowTID_00000119	chr5	101632072	101645930	Y
chr1	98769029	98777826	KnowTID_00000120	chr5	101632380	101645930	N
chr1	99432046	99447211	NovelTID_00000071	chr5	102712590	102728411	N
chr1	99440840	99442025	KnowTID_00000509	chr5	102722488	102724003	N
chr1	99533968	99534951	KnowTID_00000511	chr5	102619959	102621502	N
chr1	100028043	100041232	KnowTID_00000121	chr5	102056427	102067371	N
chr1	100069875	100088943	NovelTID_00000072	chr5	102000041	102027969	N
chr1	100069875	100090652	NovelTID_00000073	chr5	101998512	102027969	N
chr1	100486129	100662390	KnowTID_00000122	chr2	123125706	123250831	N
chr1	102824479	102825974	NovelTID_00000313	chr2	123014854	123015560	N
chr1	107011439	107029055	NovelTID_00000314	chr18	59329907	59340614	N
chr1	107021003	107024298	NovelTID_00000075	chr18	59336687	59340233	N
chr1	107141786	107159149	NovelTID_00000315	chr18	59453676	59467315	N
chr1	107767559	107774099	NovelTID_00000076	chr18	60080863	60085123	N
chr1	107784209	107787589	KnowTID_00000512	chr18	60090644	60092828	N
chr1	107868242	107869318	NovelTID_00000077	chr18	60173386	60174188	N
chr1	107885802	107886829	KnowTID_00000513	chr18	60189118	60190099	N
chr1	107969160	107972471	KnowTID_00000514	chr18	60288133	60289503	N
chr1	108049201	108068101	KnowTID_00000515	chr18	60353791	60382413	N
chr1	108296754	108298564	KnowTID_00000516	chr18	60666498	60667994	N
chr1	108420614	108424032	NovelTID_00000078	chr18	60775333	60779829	N
chr1	108694141	108695547	KnowTID_00000127	chr18	61092805	61094290	N
chr1	109813835	109847524	KnowTID_00000129	chr18	61905485	61927530	Y
chr1	109813835	109847524	KnowTID_00000130	chr18	61905485	61927530	Y
chr1	109997804	109999671	KnowTID_00000517	chr18	62038284	62039593	N
chr1	110313653	110316409	KnowTID_00000132	chr18	62314415	62316784	N
chr1	114294639	114297043	KnowTID_00000520	chr2	100050656	100051822	N
chr1	114751307	114752366	NovelTID_00000079	chr2	123360574	123360858	N
chr1	115109365	115158467	NovelTID_00000316	chr2	122958404	123020711	N
chr1	115340403	115340856	NovelTID_00000080	chr2	122756650	122756773	N
chr1	115787961	115860711	KnowTID_00000521	chr2	122903878	122951628	N
chr1	117565564	117581196	KnowTID_00000522	chr2	124772779	124782742	N
chr1	118480212	118482871	KnowTID_00000135	chr2	125674398	125677834	N
chr1	120253888	120260026	KnowTID_00000136	chr2	122452506	122458247	N
chr1	120636130	120637029	NovelTID_00000318	chr2	121881872	121882051	N
chr1	120951046	120952912	KnowTID_00000138	chr2	121491537	121492815	N
chr1	120980422	120982657	KnowTID_00000141	chr2	121441779	121453357	N
chr1	121114535	121120192	NovelTID_00000319	chr2	121298152	121303552	N
chr1	121202129	121217172	KnowTID_00000142	chr2	121210296	121223950	Y
chr1	121202129	121217172	KnowTID_00000143	chr2	121210296	121223950	Y
chr1	121225776	121235150	KnowTID_00000144	chr2	121197584	121199687	N
chr1	121225776	121282158	KnowTID_00000145	chr2	121153148	121199687	N
chr1	121336824	121340928	KnowTID_00000526	chr2	121086661	121087338	N
chr1	121339726	121342123	KnowTID_00000146	chr2	121084269	121084614	N
chr1	121340613	121342123	KnowTID_00000147	chr2	121084269	121084614	N
chr1	121549045	121551453	KnowTID_00000527	chr2	120739930	120742472	Y
chr1	121799706	121803474	KnowTID_00000148	chr2	120446680	120449319	N
chr1	122332381	122335034	KnowTID_00000149	chr2	119816937	119823944	N
chr1	122518316	122586980	KnowTID_00000150	chr2	119516360	119586890	N
chr1	122655020	122660098	NovelTID_00000084	chr2	119421979	119425997	N
chr1	122659352	122660098	NovelTID_00000085	chr2	119421979	119422907	N
chr1	122765572	122768674	KnowTID_00000151	chr2	119312969	119315011	N
chr1	122983952	123015312	KnowTID_00000152	chr2	119041457	119076957	N
chr1	122983952	123017701	KnowTID_00000153	chr2	119040087	119076957	N
chr1	122983952	123017701	KnowTID_00000154	chr2	119040087	119076957	N
chr1	122983952	123034149	KnowTID_00000155	chr2	119021090	119076957	N
chr1	122983952	123034149	KnowTID_00000156	chr2	119021090	119076957	N
chr1	122983981	123017552	KnowTID_00000157	chr2	119040209	119076928	N
chr1	122984050	123075018	KnowTID_00000158	chr2	118981704	119076857	N
chr1	122984103	122985509	KnowTID_00000159	chr2	119075632	119076801	N
chr1	123010219	123015312	KnowTID_00000160	chr2	119041457	119047377	N
chr1	123010219	123017701	KnowTID_00000161	chr2	119040087	119047377	N
chr1	123010219	123034149	KnowTID_00000162	chr2	119021090	119047377	N
chr1	123015317	123016400	KnowTID_00000163	chr2	119040693	119041457	N
chr1	123233321	123235491	KnowTID_00000164	chr2	118840303	118840625	N
chr1	123251692	123256477	KnowTID_00000529	chr2	118831382	118832834	N
chr1	124101721	124148757	KnowTID_00000166	chr2	117844364	117897668	N
chr1	125218047	125220660	KnowTID_00000530	chr2	116607684	116607994	N
chr1	126272154	126275819	KnowTID_00000531	chr2	115609129	115612408	N
chr1	126402333	126742616	KnowTID_00000532	chr2	115200075	115505220	Y
chr1	126721278	126724305	KnowTID_00000533	chr2	115211467	115216567	N
chr1	126870358	127215446	KnowTID_00000169	chr2	114789312	115100899	N
chr1	127086858	127094032	KnowTID_00000534	chr2	114885641	114887546	N
chr1	127392139	127394380	NovelTID_00000320	chr2	114588511	114589160	N
chr1	128731600	128735870	NovelTID_00000086	chr2	134439334	134441327	N
chr1	128768779	128773166	KnowTID_00000536	chr2	134482606	134490522	N
chr1	129575501	129576125	KnowTID_00000537	chr2	135478530	135478849	N
chr1	129847158	129847852	NovelTID_00000323	chr2	135953210	135953550	Y
chr1	130516676	130519076	NovelTID_00000088	chr2	136898351	136899056	N
chr1	130572233	130573677	NovelTID_00000089	chr2	136970777	136971009	N
chr1	130667175	130670998	KnowTID_00000539	chr2	137073718	137077696	N
chr1	132364548	132366802	KnowTID_00000170	chr1	207479047	207488247	N
chr1	132662960	132681010	KnowTID_00000172	chr1	207173843	207181774	N
chr1	132681112	132682388	NovelTID_00000091	chr1	207160457	207160775	N
chr1	132681112	132697286	NovelTID_00000092	chr1	207143699	207160775	Y
chr1	133463643	133464514	NovelTID_00000325	chr1	206184811	206185194	N
chr1	133796297	133796792	NovelTID_00000328	chr1	205724372	205724449	N
chr1	134238599	134246576	KnowTID_00000175	chr1	205252714	205257416	N
chr1	134371901	134373602	KnowTID_00000540	chr1	205091486	205091834	N
chr1	134768743	134773861	NovelTID_00000329	chr1	204657711	204662676	N
chr1	134840088	134841897	KnowTID_00000541	chr1	204579043	204580821	Y
chr1	134858229	134869291	KnowTID_00000542	chr1	204544827	204558235	N
chr1	135082318	135084492	KnowTID_00000176	chr1	204320490	204323488	N
chr1	135571268	135573755	KnowTID_00000181	chr1	203747315	203747948	N
chr1	135726104	135727802	KnowTID_00000183	chr1	203555223	203555661	N
chr1	135731765	135734949	KnowTID_00000184	chr1	203549673	203550077	N
chr1	135830033	135841672	NovelTID_00000094	chr1	203423399	203435295	N
chr1	135858738	135868515	KnowTID_00000185	chr1	203391072	203409841	N
chr1	135874038	135878959	NovelTID_00000095	chr1	203373895	203379421	N
chr1	135883365	135884059	KnowTID_00000186	chr1	203373022	203373209	N
chr1	135992981	135995734	KnowTID_00000543	chr1	203251649	203255798	N
chr1	136061253	136063517	NovelTID_00000096	chr1	203170458	203171857	N
chr1	136168554	136170271	NovelTID_00000334	chr1	203072609	203073637	N
chr1	136351068	136352050	KnowTID_00000544	chr1	202896432	202898431	N
chr1	136538830	136543097	KnowTID_00000545	chr1	202679710	202684849	Y
chr1	137656609	137657704	NovelTID_00000097	chr1	201444431	201445723	N
chr1	137656609	137662417	NovelTID_00000098	chr1	201438582	201445723	N
chr1	137758467	137759098	NovelTID_00000335	chr1	201317546	201318461	N
chr1	138144238	138147058	KnowTID_00000188	chr1	200854556	200857479	N
chr1	138144561	138146196	KnowTID_00000546	chr1	200855190	200857081	N
chr1	138149247	138152423	KnowTID_00000547	chr1	200847138	200850186	N
chr1	138272422	138297893	NovelTID_00000099	chr1	200657454	200679248	N
chr1	138463238	138510807	KnowTID_00000189	chr1	200397710	200455200	N
chr1	138463238	138521386	KnowTID_00000190	chr1	200379315	200455200	N
chr1	138463238	138521386	KnowTID_00000191	chr1	200379315	200455200	N
chr1	138473514	138476054	KnowTID_00000548	chr1	200442083	200444550	Y
chr1	138478420	138481754	KnowTID_00000192	chr1	200436911	200439215	N
chr1	138499609	138502045	KnowTID_00000549	chr1	200411950	200413680	N
chr1	138518674	138521227	KnowTID_00000550	chr1	200379468	200382475	N
chr1	138566250	138586093	KnowTID_00000193	chr1	200320419	200339382	N
chr1	138566250	138586093	KnowTID_00000194	chr1	200320419	200339382	N
chr1	138566250	138586093	KnowTID_00000195	chr1	200320419	200339382	N
chr1	138566250	138586093	KnowTID_00000196	chr1	200320419	200339382	N
chr1	138566250	138586093	KnowTID_00000197	chr1	200320419	200339382	N
chr1	138566250	138586093	KnowTID_00000198	chr1	200320419	200339382	N
chr1	138566250	138586093	KnowTID_00000199	chr1	200320419	200339382	N
chr1	138566250	138586093	KnowTID_00000200	chr1	200320419	200339382	N
chr1	138566250	138587091	KnowTID_00000201	chr1	200320419	200339382	N
chr1	138566250	138587091	KnowTID_00000202	chr1	200320419	200339382	N
chr1	138566250	138587091	KnowTID_00000203	chr1	200320419	200339382	N
chr1	138566250	138587091	KnowTID_00000204	chr1	200320419	200339382	N
chr1	138566250	138587091	KnowTID_00000205	chr1	200320419	200339382	N
chr1	138566250	138587091	KnowTID_00000206	chr1	200320419	200339382	N
chr1	138566250	138587091	KnowTID_00000207	chr1	200320419	200339382	N
chr1	138566250	138587091	KnowTID_00000208	chr1	200320419	200339382	N
chr1	138566250	138587379	KnowTID_00000209	chr1	200320419	200339382	N
chr1	138566250	138587379	KnowTID_00000210	chr1	200320419	200339382	N
chr1	138566250	138587379	KnowTID_00000211	chr1	200320419	200339382	N
chr1	138566250	138587379	KnowTID_00000212	chr1	200320419	200339382	N
chr1	138566250	138587379	KnowTID_00000213	chr1	200320419	200339382	N
chr1	138566250	138587379	KnowTID_00000214	chr1	200320419	200339382	N
chr1	138566250	138587379	KnowTID_00000215	chr1	200320419	200339382	N
chr1	138566250	138587379	KnowTID_00000216	chr1	200320419	200339382	N
chr1	138567301	138586093	KnowTID_00000217	chr1	200320419	200338291	N
chr1	138567301	138586093	KnowTID_00000218	chr1	200320419	200338291	N
chr1	138567301	138586093	KnowTID_00000219	chr1	200320419	200338291	N
chr1	138567301	138586093	KnowTID_00000220	chr1	200320419	200338291	N
chr1	138567301	138586093	KnowTID_00000221	chr1	200320419	200338291	N
chr1	138567301	138586093	KnowTID_00000222	chr1	200320419	200338291	N
chr1	138567301	138586093	KnowTID_00000223	chr1	200320419	200338291	N
chr1	138567301	138586093	KnowTID_00000224	chr1	200320419	200338291	N
chr1	138567301	138586093	KnowTID_00000225	chr1	200320419	200338291	N
chr1	138567301	138586093	KnowTID_00000226	chr1	200320419	200338291	N
chr1	138567301	138586093	KnowTID_00000227	chr1	200320419	200338291	N
chr1	138567301	138586093	KnowTID_00000228	chr1	200320419	200338291	N
chr1	138567301	138586093	KnowTID_00000229	chr1	200320419	200338291	N
chr1	138567301	138586093	KnowTID_00000230	chr1	200320419	200338291	N
chr1	138567301	138586093	KnowTID_00000231	chr1	200320419	200338291	N
chr1	138567301	138586093	KnowTID_00000232	chr1	200320419	200338291	N
chr1	138567301	138587091	KnowTID_00000233	chr1	200320419	200338291	N
chr1	138567301	138587091	KnowTID_00000234	chr1	200320419	200338291	N
chr1	138567301	138587091	KnowTID_00000235	chr1	200320419	200338291	N
chr1	138567301	138587091	KnowTID_00000236	chr1	200320419	200338291	N
chr1	138567301	138587091	KnowTID_00000237	chr1	200320419	200338291	N
chr1	138567301	138587091	KnowTID_00000238	chr1	200320419	200338291	N
chr1	138567301	138587091	KnowTID_00000239	chr1	200320419	200338291	N
chr1	138567301	138587091	KnowTID_00000240	chr1	200320419	200338291	N
chr1	138567301	138587091	KnowTID_00000241	chr1	200320419	200338291	N
chr1	138567301	138587091	KnowTID_00000242	chr1	200320419	200338291	N
chr1	138567301	138587091	KnowTID_00000243	chr1	200320419	200338291	N
chr1	138567301	138587091	KnowTID_00000244	chr1	200320419	200338291	N
chr1	138567301	138587379	KnowTID_00000245	chr1	200320419	200338291	N
chr1	138567301	138587379	KnowTID_00000246	chr1	200320419	200338291	N
chr1	138567301	138587379	KnowTID_00000247	chr1	200320419	200338291	N
chr1	138567301	138587379	KnowTID_00000248	chr1	200320419	200338291	N
chr1	138567301	138587379	KnowTID_00000249	chr1	200320419	200338291	N
chr1	138567301	138587379	KnowTID_00000250	chr1	200320419	200338291	N
chr1	138567301	138587379	KnowTID_00000251	chr1	200320419	200338291	N
chr1	138567301	138587379	KnowTID_00000252	chr1	200320419	200338291	N
chr1	138567301	138587379	KnowTID_00000253	chr1	200320419	200338291	N
chr1	138567301	138587379	KnowTID_00000254	chr1	200320419	200338291	N
chr1	138567301	138587379	KnowTID_00000255	chr1	200320419	200338291	N
chr1	138567301	138587379	KnowTID_00000256	chr1	200320419	200338291	N
chr1	138569506	138586093	KnowTID_00000257	chr1	200320419	200335128	N
chr1	138569506	138586093	KnowTID_00000258	chr1	200320419	200335128	N
chr1	138569506	138586093	KnowTID_00000259	chr1	200320419	200335128	N
chr1	138569506	138586093	KnowTID_00000260	chr1	200320419	200335128	N
chr1	138569506	138586093	KnowTID_00000261	chr1	200320419	200335128	N
chr1	138569506	138586093	KnowTID_00000262	chr1	200320419	200335128	N
chr1	138569506	138586093	KnowTID_00000263	chr1	200320419	200335128	N
chr1	138569506	138586093	KnowTID_00000264	chr1	200320419	200335128	N
chr1	138569506	138587091	KnowTID_00000265	chr1	200320419	200335128	N
chr1	138569506	138587091	KnowTID_00000266	chr1	200320419	200335128	N
chr1	138569506	138587091	KnowTID_00000267	chr1	200320419	200335128	N
chr1	138569506	138587091	KnowTID_00000268	chr1	200320419	200335128	N
chr1	138569506	138587091	KnowTID_00000269	chr1	200320419	200335128	N
chr1	138569506	138587091	KnowTID_00000270	chr1	200320419	200335128	N
chr1	138569506	138587091	KnowTID_00000271	chr1	200320419	200335128	N
chr1	138569506	138587091	KnowTID_00000272	chr1	200320419	200335128	N
chr1	138569506	138587379	KnowTID_00000273	chr1	200320419	200335128	N
chr1	138569506	138587379	KnowTID_00000274	chr1	200320419	200335128	N
chr1	138569506	138587379	KnowTID_00000275	chr1	200320419	200335128	N
chr1	138569506	138587379	KnowTID_00000276	chr1	200320419	200335128	N
chr1	138569506	138587379	KnowTID_00000277	chr1	200320419	200335128	N
chr1	138569506	138587379	KnowTID_00000278	chr1	200320419	200335128	N
chr1	138569506	138587379	KnowTID_00000279	chr1	200320419	200335128	N
chr1	138569506	138587379	KnowTID_00000280	chr1	200320419	200335128	N
chr1	138575659	138586093	KnowTID_00000281	chr1	200320419	200330314	N
chr1	138575659	138587091	KnowTID_00000282	chr1	200320419	200330314	N
chr1	138575659	138587379	KnowTID_00000283	chr1	200320419	200330314	N
chr1	138579913	138584490	KnowTID_00000284	chr1	200320419	200324710	N
chr1	138579913	138587379	KnowTID_00000285	chr1	200320419	200324710	N
chr1	138580131	138586093	KnowTID_00000286	chr1	200320419	200324175	N
chr1	138580131	138587091	KnowTID_00000287	chr1	200320419	200324175	N
chr1	138592787	138622305	KnowTID_00000288	chr1	200277177	200306190	N
chr1	138622138	138622719	KnowTID_00000289	chr1	200276981	200277340	N
chr1	138641251	138734236	KnowTID_00000551	chr1	200150369	200262872	N
chr1	139148718	139150634	KnowTID_00000290	chr1	199622888	199624394	N
chr1	139660653	139664104	KnowTID_00000553	chr1	199053070	199056811	N
chr1	139684255	139696119	NovelTID_00000100	chr1	199022998	199035018	N
chr1	139685607	139696119	NovelTID_00000106	chr1	199022998	199033595	N
chr1	139688000	139695014	NovelTID_00000107	chr1	199023808	199030488	N
chr1	139708425	139708708	KnowTID_00000291	chr1	199004904	199005060	N
chr1	139795165	139795755	KnowTID_00000292	chr1	198905964	198906558	Y
chr1	139795171	139796306	KnowTID_00000293	chr1	198905450	198906552	Y
chr1	139820964	139822956	KnowTID_00000295	chr1	198874304	198876033	N
chr1	139831911	139833923	KnowTID_00000296	chr1	198862938	198865230	N
chr1	139845998	139848251	KnowTID_00000297	chr1	198847808	198850405	N
chr1	139848154	139851220	KnowTID_00000298	chr1	198843867	198847901	N
chr1	139854401	139857204	KnowTID_00000299	chr1	198834057	198836934	N
chr1	139867750	139868892	KnowTID_00000300	chr1	198819301	198819512	N
chr1	139890413	139906360	NovelTID_00000108	chr1	198776934	198794739	N
chr1	140086792	140088670	KnowTID_00000554	chr1	198590501	198592692	N
chr1	140146980	140156352	NovelTID_00000109	chr1	198521375	198524455	N
chr1	140158224	140158638	KnowTID_00000301	chr1	198518944	198519373	N
chr1	140536671	140578652	KnowTID_00000555	chr1	198071919	198113168	N
chr1	140568008	140578652	KnowTID_00000556	chr1	198071919	198083992	N
chr1	140624656	140635739	NovelTID_00000338	chr1	197971077	197992186	N
chr1	140772850	140773527	KnowTID_00000557	chr1	197867537	197867983	N
chr1	140857019	140859480	KnowTID_00000558	chr1	197745581	197751037	N
chr1	141276028	141299429	KnowTID_00000302	chr1	197195549	197236515	N
chr1	141304856	141310441	KnowTID_00000303	chr1	197189355	197190328	N
chr1	142969662	142998338	NovelTID_00000342	chr1	195603164	195636335	N
chr1	142972175	142998338	NovelTID_00000343	chr1	195603164	195635455	N
chr1	143316613	143319723	KnowTID_00000559	chr1	195280184	195281037	N
chr1	145936860	145938300	NovelTID_00000110	chr1	192699046	192703014	N
chr1	146121136	146182881	NovelTID_00000111	chr1	192483300	192521282	N
chr1	146121267	146182881	NovelTID_00000112	chr1	192483300	192521250	N
chr1	146867202	146870764	KnowTID_00000560	chr1	191945529	191947055	N
chr1	147170523	147173821	KnowTID_00000561	chr1	191632569	191635157	N
chr1	147170523	147173821	KnowTID_00000562	chr1	191632569	191635157	N
chr1	148274027	148342171	KnowTID_00000563	chr1	190447629	190498697	N
chr1	148324776	148329485	KnowTID_00000564	chr1	190460714	190461433	N
chr1	150081646	150095508	KnowTID_00000565	chr1	188552884	188566155	N
chr1	151255619	151257075	KnowTID_00000566	chr1	187299755	187300921	N
chr1	151257852	151259309	KnowTID_00000567	chr1	187296952	187298800	N
chr1	151282144	151284457	KnowTID_00000569	chr1	187282102	187282802	N
chr1	151916149	151918149	NovelTID_00000114	chr1	186689046	186689375	N
chr1	151922002	151946947	KnowTID_00000570	chr1	186649876	186685445	N
chr1	151935182	151947004	KnowTID_00000571	chr1	186649769	186661260	N
chr1	151945310	151947093	KnowTID_00000572	chr1	186649686	186651471	N
chr1	152006172	152012078	KnowTID_00000573	chr1	186587878	186592249	N
chr1	152848171	152852415	NovelTID_00000115	chr1	185693067	185697532	N
chr1	152927579	152929675	KnowTID_00000574	chr1	185562283	185563648	N
chr1	152985163	152991225	KnowTID_00000307	chr1	185495105	185498096	N
chr1	153096265	153098547	NovelTID_00000345	chr1	185384515	185386354	N
chr1	153096265	153099177	NovelTID_00000346	chr1	185384515	185386354	N
chr1	153117271	153119587	KnowTID_00000575	chr1	185363954	185365665	N
chr1	153584363	153589612	NovelTID_00000116	chr1	184738712	184745863	N
chr1	153596079	153597128	KnowTID_00000576	chr1	184731059	184731531	N
chr1	154013560	154018556	NovelTID_00000117	chr1	184263286	184267413	N
chr1	154023723	154060333	NovelTID_00000118	chr1	184217977	184254009	N
chr1	154067600	154069837	NovelTID_00000119	chr1	184208126	184210185	N
chr1	154139312	154139658	KnowTID_00000577	chr1	184121633	184121980	N
chr1	154750587	154752359	KnowTID_00000308	chr1	183439277	183440870	Y
chr1	154783733	154784171	KnowTID_00000309	chr1	183411521	183412355	N
chr1	155561783	155563699	KnowTID_00000310	chr1	182593922	182594600	N
chr1	155568369	155584959	KnowTID_00000578	chr1	182575342	182588843	N
chr1	155827021	155853510	NovelTID_00000347	chr1	182242014	182270172	N
chr1	155849598	155853510	NovelTID_00000348	chr1	182242014	182243231	N
chr1	155849603	155853350	NovelTID_00000349	chr1	182242014	182243231	N
chr1	155857219	155872215	NovelTID_00000121	chr1	182218441	182229654	N
chr1	155857876	155871828	NovelTID_00000122	chr1	182219398	182229654	N
chr1	155877654	155878617	NovelTID_00000123	chr1	182209183	182210090	N
chr1	155878783	155880200	NovelTID_00000124	chr1	182206631	182208365	N
chr1	156088650	156104036	KnowTID_00000579	chr1	181954945	181963028	N
chr1	156102818	156117546	KnowTID_00000311	chr1	181921117	181956152	N
chr1	156636012	156638488	NovelTID_00000126	chr1	181389593	181391898	N
chr1	156638884	156639873	KnowTID_00000580	chr1	181388162	181389268	N
chr1	156729295	156731154	KnowTID_00000581	chr1	181287175	181288881	N
chr1	156843782	156864202	NovelTID_00000350	chr1	181148846	181175381	N
chr1	156910652	156930396	KnowTID_00000582	chr1	181074827	181097448	N
chr1	157080334	157081565	NovelTID_00000127	chr1	180895594	180896932	N
chr1	157087820	157088842	KnowTID_00000583	chr1	180885945	180887119	Y
chr1	157088554	157089398	KnowTID_00000584	chr1	180885350	180886236	Y
chr1	157820447	157821636	KnowTID_00000312	chr1	179922841	179923840	Y
chr1	158260582	158262015	NovelTID_00000351	chr1	179503693	179513343	Y
chr1	158260582	158262300	NovelTID_00000352	chr1	179503423	179513343	Y
chr1	158332474	158348372	NovelTID_00000353	chr7	134173121	134175915	Y
chr1	158711920	158718250	NovelTID_00000128	chr1	178902182	178907499	N
chr1	158869968	158870325	KnowTID_00000315	chr1	178693694	178694073	Y
chr1	158902947	158920572	NovelTID_00000354	chr1	178625836	178651824	N
chr1	158922703	158948895	NovelTID_00000129	chr1	178593833	178624310	N
chr1	158925777	158940073	NovelTID_00000130	chr1	178602044	178622340	N
chr1	158928151	158940058	NovelTID_00000131	chr1	178602044	178620177	N
chr1	158938532	158940073	NovelTID_00000132	chr1	178602044	178603854	N
chr1	158957619	158967217	NovelTID_00000133	chr1	178565152	178574431	N
chr1	158958137	158960096	NovelTID_00000134	chr1	178571899	178574413	N
chr1	158973677	158975980	KnowTID_00000316	chr1	178554414	178555388	N
chr1	158990027	158995639	NovelTID_00000355	chr1	178532266	178542574	N
chr1	159381444	159388523	NovelTID_00000136	chr1	178007306	178019457	N
chr1	159636921	159638260	NovelTID_00000137	chr1	177788846	177790147	N
chr1	159636921	159638260	NovelTID_00000138	chr1	177788846	177790147	N
chr1	159677161	159679621	NovelTID_00000139	chr1	177744879	177748151	N
chr1	159677161	159689598	NovelTID_00000140	chr1	177735451	177748151	N
chr1	159683194	159689598	NovelTID_00000141	chr1	177735451	177741798	N
chr1	159820005	159823125	NovelTID_00000142	chr1	177614105	177617174	N
chr1	161065527	161096518	KnowTID_00000317	chr1	176305766	176344425	N
chr1	161860314	161861857	KnowTID_00000318	chr1	175284332	175285987	Y
chr1	161865169	161870287	NovelTID_00000356	chr1	175275345	175281032	N
chr1	161867442	161869705	NovelTID_00000357	chr1	175276338	175278649	N
chr1	161906911	161908428	NovelTID_00000358	chr1	175236643	175237380	N
chr1	161906911	161908428	NovelTID_00000359	chr1	175236643	175237380	N
chr1	161906911	161909253	NovelTID_00000360	chr1	175223794	175237380	N
chr1	161906911	161909253	NovelTID_00000361	chr1	175223794	175237380	N
chr1	161915773	161925342	NovelTID_00000362	chr1	175196517	175220107	N
chr1	161915773	161933791	NovelTID_00000363	chr1	175190820	175220107	N
chr1	161915773	161933791	NovelTID_00000364	chr1	175190820	175220107	N
chr1	161915773	161933791	NovelTID_00000365	chr1	175190820	175220107	N
chr1	161915773	161955385	NovelTID_00000366	chr1	175177640	175220107	N
chr1	161915773	161955887	NovelTID_00000367	chr1	175177530	175220107	N
chr1	161915773	161955887	NovelTID_00000368	chr1	175177530	175220107	N
chr1	161915997	161955887	NovelTID_00000369	chr1	175177530	175219871	N
chr1	162143103	162144018	KnowTID_00000319	chr1	174967858	174968914	Y
chr1	162143824	162144947	KnowTID_00000320	chr1	174967777	174968085	Y
chr1	162933393	162936632	KnowTID_00000585	chr1	173868904	173872327	Y
chr1	163643835	163644958	KnowTID_00000321	chr1	172732197	172733182	N
chr1	163697759	163705217	NovelTID_00000370	chr1	172644399	172667179	N
chr1	163698013	163705107	NovelTID_00000371	chr1	172644552	172654764	N
chr1	163807969	163813045	KnowTID_00000322	chr1	172498592	172499551	N
chr1	163820578	163831044	KnowTID_00000323	chr1	172479097	172488810	N
chr1	164546645	164550590	NovelTID_00000143	chr1	171633845	171635587	N
chr1	164797208	164799687	KnowTID_00000324	chr1	171213102	171217170	N
chr1	164801726	164803839	NovelTID_00000144	chr1	171180162	171182564	Y
chr1	165027125	165028104	NovelTID_00000145	chr1	170889355	170889496	N
chr1	165039123	165041106	KnowTID_00000325	chr1	170879464	170881614	N
chr1	165932939	165942968	KnowTID_00000586	chr1	169749290	169755599	Y
chr1	165971104	165975624	NovelTID_00000372	chr1	169708392	169714695	N
chr1	166389183	166394614	KnowTID_00000326	chr1	169070370	169074822	N
chr1	166390315	166392729	NovelTID_00000373	chr1	169071510	169073747	N
chr1	166390315	166393721	NovelTID_00000374	chr1	169070804	169073747	N
chr1	166394276	166403886	NovelTID_00000375	chr1	169061018	169069756	N
chr1	166394504	166396880	NovelTID_00000376	chr1	169065531	169069756	N
chr1	166396150	166402422	NovelTID_00000377	chr1	169061264	169069356	N
chr1	166396150	166403886	NovelTID_00000378	chr1	169061018	169069356	N
chr1	166408698	166425438	NovelTID_00000379	chr1	169039023	169053677	N
chr1	166421278	166425428	NovelTID_00000380	chr1	169039023	169042707	N
chr1	166423009	166424554	NovelTID_00000381	chr1	169039023	169040304	N
chr1	166433437	166445013	KnowTID_00000327	chr1	169014119	169029721	Y
chr1	166466191	166466931	NovelTID_00000382	chr1	168989641	168989928	N
chr1	166505585	166507884	KnowTID_00000328	chr1	168940325	168941936	N
chr1	166507564	166508684	KnowTID_00000329	chr1	168939531	168940608	N
chr1	166560950	166562257	NovelTID_00000146	chr1	168887032	168888317	N
chr1	166642684	166645059	NovelTID_00000147	chr1	168791800	168796388	N
chr1	166769723	166775695	NovelTID_00000383	chr1	168640919	168644232	N
chr1	166792594	166794385	NovelTID_00000384	chr1	168622059	168624293	N
chr1	166793251	166801569	KnowTID_00000330	chr1	168617880	168623107	N
chr1	166799489	166800818	KnowTID_00000331	chr1	168618241	168619274	N
chr1	166802963	166806484	KnowTID_00000587	chr1	168609756	168615662	N
chr1	166881547	166883478	NovelTID_00000385	chr1	168523895	168525302	N
chr1	166891051	166891530	KnowTID_00000332	chr1	168502358	168504291	N
chr1	166891051	166892955	KnowTID_00000333	chr1	168500530	168504291	N
chr1	166922912	166927603	NovelTID_00000386	chr1	168466808	168472529	N
chr1	166992956	167039307	NovelTID_00000148	chr1	168341794	168381832	N
chr1	166994154	166998245	KnowTID_00000588	chr1	168374952	168380143	N
chr1	166994154	167022061	KnowTID_00000589	chr1	168356585	168380143	N
chr1	167213083	167214480	NovelTID_00000149	chr1	168103354	168105084	Y
chr1	167255963	167256876	KnowTID_00000334	chr1	168048781	168049829	Y
chr1	167259026	167259276	KnowTID_00000590	chr1	168045916	168045949	N
chr1	167515313	167516122	KnowTID_00000335	chr1	167769084	167770105	N
chr1	167651686	167652908	KnowTID_00000336	chr1	167581704	167583923	N
chr1	167933088	167968389	KnowTID_00000337	chr1	167151844	167189827	N
chr1	167978041	167981038	NovelTID_00000392	chr1	167134172	167137724	N
chr1	168269656	168276833	NovelTID_00000150	chr1	166857247	166862922	Y
chr1	168378382	168385619	KnowTID_00000592	chr1	166707737	166768491	N
chr1	168904153	168929861	KnowTID_00000593	chr1	166136838	166155457	N
chr1	168928523	168930972	KnowTID_00000594	chr1	166136196	166138817	Y
chr1	169153016	169153231	KnowTID_00000338	chr1	165880652	165880858	Y
chr1	169155086	169155355	KnowTID_00000339	chr1	165878282	165878540	Y
chr1	170605402	170606013	KnowTID_00000595	chr1	164291798	164292364	N
chr1	171393095	171400866	NovelTID_00000151	chr1	163367482	163376420	N
chr1	171393095	171400866	NovelTID_00000152	chr1	163367482	163376420	N
chr1	171410463	171414206	KnowTID_00000596	chr1	163344233	163347969	N
chr1	171410463	171415603	KnowTID_00000597	chr1	163342636	163347969	N
chr1	171698313	171699173	NovelTID_00000153	chr1	163015833	163016591	N
chr1	172105310	172106446	KnowTID_00000340	chr1	162527223	162531009	Y
chr1	172184179	172185870	KnowTID_00000598	chr1	162467626	162468141	N
chr1	172797997	172800861	KnowTID_00000341	chr1	161733529	161736015	N
chr1	172912074	172916597	KnowTID_00000342	chr1	161628276	161630082	N
chr1	173190863	173191265	KnowTID_00000599	chr1	161157283	161157732	N
chr1	173353315	173367449	KnowTID_00000603	chr1	160991194	161003817	Y
chr1	173353579	173367483	KnowTID_00000604	chr1	160991160	161003817	Y
chr1	173486175	173487010	NovelTID_00000394	chr1	160834132	160835329	N
chr1	173552040	173553090	NovelTID_00000154	chr1	160742265	160742858	N
chr1	174305102	174306494	KnowTID_00000608	chr1	160001855	160003744	N
chr1	174318366	174321120	KnowTID_00000609	chr1	159992616	159993131	N
chr1	174318496	174320816	KnowTID_00000610	chr1	159992616	159993131	N
chr1	174318496	174321149	KnowTID_00000611	chr1	159992616	159993131	N
chr1	174365438	174405100	KnowTID_00000344	chr1	159924501	159964280	N
chr1	174443379	174444938	KnowTID_00000345	chr1	159879601	159881533	Y
chr1	174444978	174448326	NovelTID_00000155	chr1	159876115	159879601	N
chr1	174741213	174744969	NovelTID_00000156	chr1	159267977	159271765	N
chr1	174803681	174804544	KnowTID_00000346	chr1	159569303	159569952	N
chr1	174920148	174920992	NovelTID_00000157	chr1	159479056	159479915	N
chr1	177504439	177508546	KnowTID_00000347	chr1	241625832	241632126	N
chr1	177885585	177887529	KnowTID_00000612	chr1	242246001	242247785	N
chr1	178206343	178209900	KnowTID_00000348	chr1	242688959	242692226	N
chr1	178300285	178303851	KnowTID_00000613	chr1	242794996	242799877	N
chr1	178360241	178457400	KnowTID_00000614	chr1	242857504	242990179	N
chr1	179237953	179250736	NovelTID_00000158	chr1	244066573	244079547	N
chr1	179237953	179273265	NovelTID_00000159	chr1	244066573	244099256	N
chr1	179389096	179391334	KnowTID_00000349	chr1	244228897	244231206	Y
chr1	179397508	179406398	KnowTID_00000350	chr1	244238098	244253437	N
chr1	179449207	179452177	NovelTID_00000160	chr1	244292175	244297448	N
chr1	179565837	179567068	KnowTID_00000615	chr1	244391137	244391956	N
chr1	179571672	179573074	KnowTID_00000616	chr1	244395949	244397460	N
chr1	180269731	180271601	KnowTID_00000351	chr1	245037701	245038274	N
chr1	180434541	180436011	NovelTID_00000161	chr1	245279007	245281480	N
chr1	180865174	180869266	KnowTID_00000352	chr1	245868915	245872667	Y
chr1	180867240	180869330	KnowTID_00000353	chr1	245870463	245872733	Y
chr1	181795665	181797240	NovelTID_00000395	chr1	227616111	227617720	Y
chr1	182142027	182144881	NovelTID_00000396	chr1	227100816	227106654	N
chr1	182142027	182154486	NovelTID_00000397	chr1	227095768	227106654	N
chr1	182142027	182154486	NovelTID_00000398	chr1	227095768	227106654	N
chr1	182447589	182449544	KnowTID_00000617	chr1	226669384	226669632	N
chr1	182707972	182709037	KnowTID_00000355	chr1	226297096	226298375	N
chr1	182807593	182815947	KnowTID_00000618	chr1	226140724	226146459	N
chr1	183017272	183020178	KnowTID_00000620	chr1	224413796	224415204	Y
chr1	183020764	183023489	KnowTID_00000357	chr4	1800977	1810193	N
chr1	183162589	183165130	NovelTID_00000163	chr1	224644841	224647406	Y
chr1	183162589	183165130	NovelTID_00000164	chr1	224644841	224647406	Y
chr1	183163754	183165130	NovelTID_00000165	chr1	224645738	224647406	Y
chr1	183215938	183226722	NovelTID_00000166	chr1	224704354	224720860	N
chr1	183215960	183226153	NovelTID_00000167	chr1	224704376	224718280	N
chr1	183547071	183548010	KnowTID_00000622	chr1	225231824	225232128	N
chr1	183583509	183608139	KnowTID_00000359	chr1	225334633	225373836	Y
chr1	183616560	183620373	KnowTID_00000623	chr1	225392596	225394833	N
chr1	183830003	183832015	KnowTID_00000624	chr1	225679331	225681471	N
chr1	183950354	183952697	KnowTID_00000360	chr1	225841182	225844749	N
chr1	183957414	183961340	KnowTID_00000625	chr1	225851499	225856082	N
chr1	183957414	183963763	KnowTID_00000626	chr1	225851499	225865007	N
chr1	184185436	184200074	NovelTID_00000168	chr1	224391443	224400750	Y
chr1	184185514	184202713	NovelTID_00000169	chr1	224389564	224400666	Y
chr1	184185532	184186374	NovelTID_00000170	chr1	224399505	224400660	Y
chr1	184230964	184233420	KnowTID_00000362	chr3	186617916	186618370	N
chr1	184293412	184302950	NovelTID_00000401	chr1	224251625	224261351	N
chr1	184293412	184302950	NovelTID_00000402	chr1	224251625	224261351	N
chr1	184309194	184312448	NovelTID_00000403	chr1	224075725	224229168	N
chr1	184447753	184450875	NovelTID_00000404	chr1	223894359	223900081	Y
chr1	184599987	184600665	NovelTID_00000405	chr1	223673614	223674320	N
chr1	184610069	184612023	KnowTID_00000363	chr1	223659273	223661252	N
chr1	184837840	184840672	KnowTID_00000627	chr1	223374871	223375930	N
chr1	184865825	184869569	KnowTID_00000364	chr1	223335866	223338726	N
chr1	185377279	185388348	NovelTID_00000172	chr1	222545232	222553408	N
chr1	185501785	185502577	NovelTID_00000406	chr1	222404546	222404683	N
chr1	185572855	185633625	KnowTID_00000365	chr1	222211423	222290568	N
chr1	185764375	185790022	NovelTID_00000407	chr1	221996258	222026909	N
chr1	185764375	185818319	NovelTID_00000408	chr1	221963372	222026909	N
chr1	185765841	185807119	NovelTID_00000409	chr1	221980018	222024452	N
chr1	185825833	185828737	NovelTID_00000410	chr1	221952288	221958414	N
chr1	185830241	185831748	NovelTID_00000411	chr1	221946945	221950731	N
chr1	185993695	185996151	NovelTID_00000176	chr1	221737987	221740727	N
chr1	186198116	186206458	NovelTID_00000412	chr1	221456677	221462023	N
chr1	186266858	186267611	KnowTID_00000367	chr1	221386055	221386894	N
chr1	186351719	186381570	KnowTID_00000628	chr1	221249372	221279060	N
chr1	186558044	186563517	NovelTID_00000177	chr1	221047326	221051070	N
chr1	186603931	186606159	NovelTID_00000413	chr1	220992409	220995179	N
chr1	186855165	186856764	NovelTID_00000179	chr1	220665896	220667235	N
chr1	186880515	186883676	NovelTID_00000180	chr1	220629835	220635234	N
chr1	186909980	186915198	KnowTID_00000368	chr1	220595264	220601347	N
chr1	187153329	187155737	KnowTID_00000369	chr1	220264159	220265684	Y
chr1	187183339	187186744	KnowTID_00000629	chr1	220229311	220229988	N
chr1	187435383	187468937	NovelTID_00000181	chr1	219874412	219930370	N
chr1	188006135	188006623	KnowTID_00000631	chr1	219240613	219241020	N
chr1	188171193	188172304	KnowTID_00000371	chr1	218982623	218983788	N
chr1	188335716	188382351	KnowTID_00000632	chr1	218687500	218735106	N
chr1	188335760	188382560	KnowTID_00000633	chr1	218686991	218735106	N
chr1	188411203	188425763	NovelTID_00000182	chr1	218640100	218648752	N
chr1	188411203	188425763	NovelTID_00000183	chr1	218640100	218648752	N
chr1	188411203	188425763	NovelTID_00000184	chr1	218640100	218648752	N
chr1	188411203	188429232	NovelTID_00000185	chr1	218637976	218648752	N
chr1	188411203	188429232	NovelTID_00000186	chr1	218637976	218648752	N
chr1	188411203	188429232	NovelTID_00000187	chr1	218637976	218648752	N
chr1	188411203	188438793	NovelTID_00000188	chr1	218625054	218648752	N
chr1	188411203	188438793	NovelTID_00000189	chr1	218625054	218648752	N
chr1	188411203	188438793	NovelTID_00000190	chr1	218625054	218648752	N
chr1	188411203	188438793	NovelTID_00000191	chr1	218625054	218648752	N
chr1	188411203	188438793	NovelTID_00000192	chr1	218625054	218648752	N
chr1	188411205	188439324	NovelTID_00000193	chr1	218624544	218648750	N
chr1	188411409	188413493	NovelTID_00000194	chr1	218647422	218648574	N
chr1	188413664	188423794	NovelTID_00000195	chr1	218642014	218647215	N
chr1	188413664	188437831	NovelTID_00000196	chr1	218626086	218647215	N
chr1	188535096	188536977	KnowTID_00000634	chr1	218512714	218514372	N
chr1	188573274	188576800	KnowTID_00000372	chr1	218454985	218458553	N
chr1	188750811	188753991	KnowTID_00000373	chr1	218199285	218204064	N
chr1	189271755	189286543	KnowTID_00000374	chr1	217494141	217507947	N
chr1	189310084	189315003	NovelTID_00000414	chr1	217446828	217451778	N
chr1	189411354	189414845	NovelTID_00000415	chr1	217333420	217337705	N
chr1	190888773	190890312	KnowTID_00000375	chr1	215634171	215635274	N
chr1	190912396	190913399	KnowTID_00000636	chr1	215591113	215591698	N
chr1	191863216	191869066	NovelTID_00000416	chr1	214297569	214302094	N
chr1	191872666	191912745	NovelTID_00000197	chr1	214242207	214294356	N
chr1	191881917	191886247	NovelTID_00000418	chr1	214280569	214284404	N
chr1	191881917	191886247	NovelTID_00000419	chr1	214280569	214284404	N
chr1	191882028	191883530	NovelTID_00000420	chr1	214282739	214283560	N
chr1	191882337	191883603	NovelTID_00000421	chr1	214282715	214283560	N
chr1	191882411	191883603	NovelTID_00000422	chr1	214282715	214283560	N
chr1	191882584	191884200	NovelTID_00000423	chr1	214282715	214283560	N
chr1	191883193	191912777	NovelTID_00000198	chr1	214242207	214283394	N
chr1	191883193	191915182	NovelTID_00000199	chr1	214241425	214283394	N
chr1	191897453	191912353	NovelTID_00000200	chr1	214242609	214259049	N
chr1	192042567	192048018	NovelTID_00000201	chr1	214113204	214116884	N
chr1	192042567	192048018	NovelTID_00000202	chr1	214113204	214116884	N
chr1	192198529	192215928	NovelTID_00000425	chr1	213934714	213957335	N
chr1	192227526	192241024	KnowTID_00000376	chr1	213902645	213918183	N
chr1	192243211	192268724	KnowTID_00000637	chr1	213859239	213898791	N
chr1	192515135	192519146	NovelTID_00000203	chr1	213548100	213554741	N
chr1	192515135	192521557	NovelTID_00000204	chr1	213546614	213554741	N
chr1	192961922	192962968	NovelTID_00000426	chr1	212811675	212812560	N
chr1	193073302	193075145	KnowTID_00000377	chr1	212694156	212695910	N
chr1	193091056	193112593	KnowTID_00000378	chr1	212651966	212673672	N
chr1	193123383	193125138	NovelTID_00000205	chr1	212629029	212629681	N
chr1	193222538	193227151	KnowTID_00000638	chr1	212449653	212457330	N
chr1	193230429	193231040	NovelTID_00000206	chr1	212445063	212445692	N
chr1	193234733	193236912	KnowTID_00000379	chr1	212438996	212443501	N
chr1	193244225	193245275	NovelTID_00000427	chr1	212429720	212431195	N
chr1	193244225	193246862	NovelTID_00000428	chr1	212429032	212431195	N
chr1	193244550	193245802	NovelTID_00000207	chr1	212429197	212430505	N
chr1	193253395	193256582	NovelTID_00000429	chr1	212414216	212417199	N
chr1	193260218	193288927	KnowTID_00000639	chr1	212386231	212410558	N
chr1	193297897	193300405	NovelTID_00000208	chr1	212375874	212376437	N
chr1	193311111	193314194	NovelTID_00000209	chr1	212340557	212350209	N
chr1	193314220	193315396	NovelTID_00000210	chr1	212339510	212340522	N
chr1	193315061	193319118	NovelTID_00000430	chr1	212334882	212339596	N
chr1	193641274	193643421	KnowTID_00000381	chr1	211851200	211854480	N
chr1	193644548	193645228	KnowTID_00000640	chr1	211849122	211849385	N
chr1	194717429	194720945	KnowTID_00000641	chr1	210337235	210343905	Y
chr1	195302818	195305444	NovelTID_00000211	chr1	209635124	209638866	N
chr1	195469965	195481962	NovelTID_00000431	chr1	209439825	209458773	N
chr1	195514265	195614604	NovelTID_00000212	chr1	209278453	209398604	N
chr1	195514265	195614604	NovelTID_00000213	chr1	209278453	209398604	N
chr1	195771034	195773981	KnowTID_00000642	chr1	209115756	209118395	N
chr1	196038380	196048953	KnowTID_00000643	chr1	208826639	208840223	N
chr1	196041418	196042773	KnowTID_00000644	chr1	208837025	208838454	N
chr1	196126557	196138877	NovelTID_00000432	chr1	208729272	208746367	N
chr1	196126557	196143606	NovelTID_00000433	chr1	208724408	208746367	N
chr1	196126557	196167676	NovelTID_00000434	chr1	208702181	208746367	N
chr1	196126557	196167676	NovelTID_00000435	chr1	208702181	208746367	N
chr1	196126574	196149138	NovelTID_00000436	chr1	208719379	208746348	N
chr1	196126574	196164769	NovelTID_00000437	chr1	208704399	208746348	N
chr1	196126782	196149192	NovelTID_00000438	chr1	208719325	208746138	N
chr1	196133248	196143606	NovelTID_00000439	chr1	208724408	208736780	N
chr1	196133248	196167676	NovelTID_00000440	chr1	208702181	208736780	N
chr1	196136715	196167676	NovelTID_00000441	chr1	208702181	208731656	N
chr1	196144690	196150653	NovelTID_00000442	chr1	208717813	208723724	N
chr1	196184106	196190455	NovelTID_00000443	chr1	208673038	208679929	N
chr1	196819453	196822389	KnowTID_00000383	chr1	208020641	208024097	N
chr1	196839940	196842646	KnowTID_00000384	chr1	207997891	208001001	N
chr1	196844091	196844441	KnowTID_00000645	chr1	207996252	207996606	N
chr1	197046244	197048960	KnowTID_00000646	chr1	207575091	207576912	N
chr10	3128184	3134202	NovelTID_00000858	chr6	154831937	154841843	N
chr10	5950117	5952634	KnowTID_00000860	chr6	151717992	151719943	N
chr10	5952416	5954789	KnowTID_00000861	chr6	151716581	151718033	N
chr10	6092765	6100749	KnowTID_00000647	chr6	151530061	151550997	N
chr10	6133420	6140115	KnowTID_00000648	chr6	151477707	151483904	N
chr10	6617518	6619411	KnowTID_00000862	chr6	150905978	150908953	N
chr10	6627134	6628376	KnowTID_00000863	chr6	150897008	150900152	N
chr10	7544964	7547304	KnowTID_00000649	chr6	149811133	149815323	N
chr10	7696165	7702693	NovelTID_00000444	chr6	149595578	149615569	N
chr10	7696983	7703156	NovelTID_00000445	chr6	149595076	149615569	N
chr10	7699844	7703166	NovelTID_00000446	chr6	149595065	149600400	N
chr10	7803903	7806374	NovelTID_00000862	chr6	149499606	149501392	N
chr10	7895935	7913447	NovelTID_00000447	chr6	149405261	149430074	N
chr10	7912531	7914962	NovelTID_00000863	chr6	149404626	149405588	N
chr10	8662761	8665101	KnowTID_00000864	chr6	148593399	148596479	N
chr10	8778617	8781324	KnowTID_00000865	chr6	148475463	148478361	N
chr10	8789216	8791273	KnowTID_00000866	chr6	148466676	148468986	N
chr10	8889584	8892601	KnowTID_00000868	chr6	148355540	148356198	N
chr10	8943771	8944549	KnowTID_00000870	chr6	148309858	148310180	N
chr10	9017809	9020414	KnowTID_00000871	chr6	148228979	148231872	N
chr10	9018743	9020386	KnowTID_00000650	chr6	148228985	148231030	N
chr10	9080976	9083107	KnowTID_00000872	chr6	148178718	148180448	N
chr10	9147396	9151624	KnowTID_00000873	chr6	148105219	148108643	N
chr10	9167876	9171236	KnowTID_00000874	chr6	148089040	148091852	N
chr10	9202726	9207000	KnowTID_00000875	chr6	148044710	148051806	N
chr10	9266043	9267319	KnowTID_00000876	chr6	147973039	147974368	N
chr10	9342744	9344647	KnowTID_00000877	chr6	147889382	147891157	N
chr10	9418497	9419083	NovelTID_00000864	chr6	147788080	147788474	N
chr10	9620955	9642736	NovelTID_00000448	chr6	147505923	147524908	Y
chr10	9737176	9741204	KnowTID_00000652	chr6	147425232	147428542	N
chr10	9871156	9890273	NovelTID_00000449	chr6	147311190	147322694	Y
chr10	9954788	9957125	KnowTID_00000653	chr6	147249003	147250062	N
chr10	9954791	9978497	KnowTID_00000654	chr6	147228762	147250062	N
chr10	9985400	9989699	NovelTID_00000865	chr6	147224450	147228008	N
chr10	9985400	9991222	NovelTID_00000866	chr6	147222596	147228008	N
chr10	10964587	11000797	KnowTID_00000878	chr6	146136353	146166428	Y
chr10	10975346	11001019	KnowTID_00000879	chr6	146136023	146159788	Y
chr10	11021896	11023877	KnowTID_00000655	chr6	146115387	146117118	Y
chr10	11808199	11848109	NovelTID_00000450	chr6	145406879	145463803	N
chr10	12636443	12642925	KnowTID_00000880	chr6	144537131	144544965	N
chr10	12636443	12642925	KnowTID_00000881	chr6	144537131	144544965	N
chr10	13216027	13216553	NovelTID_00000867	chr6	143836108	143836481	N
chr10	13591085	13599014	KnowTID_00000657	chr6	143363720	143378981	N
chr10	13647003	13648770	KnowTID_00000882	chr6	143292820	143306459	N
chr10	13685579	13685781	KnowTID_00000658	chr6	143267320	143267515	N
chr10	13929850	13935757	NovelTID_00000868	chr6	142997923	143005514	N
chr10	13929850	13935757	NovelTID_00000869	chr6	142997923	143005514	N
chr10	13929850	13935757	NovelTID_00000870	chr6	142997923	143005514	N
chr10	14033713	14034539	KnowTID_00000883	chr6	142891101	142891960	N
chr10	14042287	14044213	NovelTID_00000451	chr6	142883263	142886787	N
chr10	14265143	14271199	NovelTID_00000452	chr6	142619252	142623022	Y
chr10	14900908	15197661	KnowTID_00000659	chr6	141712767	141985919	N
chr10	15020155	15021518	KnowTID_00000660	chr6	141882394	141884054	N
chr10	15020197	15032182	KnowTID_00000661	chr6	141863712	141884012	N
chr10	15455049	15479859	NovelTID_00000871	chr6	141485759	141537202	N
chr10	15455049	15479859	NovelTID_00000872	chr6	141485759	141537202	N
chr10	15467212	15470883	NovelTID_00000873	chr6	141495141	141520078	N
chr10	16670899	16815588	KnowTID_00000884	chr6	140312455	140432839	N
chr10	16670900	16675819	KnowTID_00000885	chr6	140429918	140432838	N
chr10	17248888	17273725	NovelTID_00000454	chr6	139874267	139911558	N
chr10	17394637	17396523	NovelTID_00000455	chr6	139746241	139748342	N
chr10	17510327	17515134	KnowTID_00000886	chr6	139614568	139616751	N
chr10	17744048	17745453	NovelTID_00000874	chr6	139348243	139348858	N
chr10	17954858	17957866	KnowTID_00000665	chr6	139088519	139094840	Y
chr10	18301651	18304913	KnowTID_00000887	chr6	138662454	138665746	Y
chr10	18595359	18606851	NovelTID_00000875	chr6	138344304	138353494	N
chr10	18596683	18606851	NovelTID_00000876	chr6	138344304	138352135	N
chr10	18637103	18638195	NovelTID_00000457	chr6	138296106	138296903	N
chr10	18637103	18647205	NovelTID_00000458	chr6	138287600	138296903	N
chr10	18637103	18652354	NovelTID_00000459	chr6	138280358	138296903	N
chr10	18637103	18652354	NovelTID_00000460	chr6	138280358	138296903	N
chr10	18637103	18659353	NovelTID_00000461	chr6	138280358	138296903	N
chr10	18637103	18659353	NovelTID_00000462	chr6	138280358	138296903	N
chr10	18637103	18670629	NovelTID_00000463	chr6	138269552	138296903	N
chr10	18637103	18671533	NovelTID_00000464	chr6	138268478	138296903	N
chr10	18650863	18652354	NovelTID_00000465	chr6	138280358	138283092	N
chr10	18650863	18659353	NovelTID_00000466	chr6	138280358	138283092	N
chr10	18650863	18670629	NovelTID_00000467	chr6	138269552	138283092	N
chr10	18650887	18671533	NovelTID_00000468	chr6	138268478	138283092	N
chr10	18781418	18783349	NovelTID_00000469	chr6	138142436	138146325	Y
chr10	18806335	18806984	KnowTID_00000888	chr6	138126993	138127721	N
chr10	18813855	18821401	KnowTID_00000889	chr6	138113211	138121657	N
chr10	18861554	18927753	KnowTID_00000666	chr6	137998071	138070355	N
chr10	18887043	18927753	KnowTID_00000667	chr6	137998071	138046782	N
chr10	18955014	18962502	NovelTID_00000877	chr6	137960233	137969668	N
chr10	18997681	19000089	KnowTID_00000668	chr6	137921560	137923432	N
chr10	19010794	19045623	KnowTID_00000669	chr6	137850179	137900429	N
chr10	19057197	19063754	NovelTID_00000470	chr6	137829808	137836219	N
chr10	19206520	19227117	KnowTID_00000670	chr6	137605443	137640538	N
chr10	19239107	19242456	KnowTID_00000891	chr6	137587726	137592010	N
chr10	20887091	20889184	NovelTID_00000471	chr6	135493871	135495015	N
chr10	20891840	20906600	NovelTID_00000878	chr6	135469067	135493144	N
chr10	20906749	20908423	KnowTID_00000671	chr6	135466998	135468913	N
chr10	20946693	20972061	NovelTID_00000879	chr6	135409235	135435223	N
chr10	21176687	21178437	KnowTID_00000672	chr6	135154434	135155495	N
chr10	21550304	21564657	KnowTID_00000892	chr6	134682853	134694938	N
chr10	22290465	22333263	NovelTID_00000890	chr6	134393639	134428600	N
chr10	22290465	22333263	NovelTID_00000891	chr6	134393639	134428600	N
chr10	22471702	22473138	KnowTID_00000674	chr6	134260801	134261215	N
chr10	22794032	22796653	NovelTID_00000892	chr6	133894530	133895165	N
chr10	23331068	23341954	KnowTID_00000897	chr6	133276179	133284414	N
chr10	23426612	23431274	NovelTID_00000893	chr6	133215607	133221069	N
chr10	23446149	23467178	KnowTID_00000675	chr6	133186031	133202126	N
chr10	23498417	23499640	KnowTID_00000898	chr6	133148996	133149326	N
chr10	23501062	23502409	KnowTID_00000899	chr6	133145860	133146313	N
chr10	23922706	23925554	KnowTID_00000676	chr6	132751980	132754447	N
chr10	24079337	24081611	KnowTID_00000900	chr6	132555435	132557159	N
chr10	24157367	24160960	KnowTID_00000677	chr6	132456395	132461332	N
chr10	24269120	24269797	KnowTID_00000901	chr6	132320324	132320949	Y
chr10	24269120	24273500	KnowTID_00000902	chr6	132317886	132320949	Y
chr10	24269246	24270146	KnowTID_00000903	chr6	132320324	132320835	Y
chr10	24294132	24297428	KnowTID_00000904	chr6	132295285	132299493	N
chr10	24647377	24650489	NovelTID_00000473	chr6	131891680	131894218	N
chr10	24650529	24677534	NovelTID_00000895	chr6	131857807	131890564	N
chr10	24682144	24683290	NovelTID_00000896	chr6	131854533	131854719	N
chr10	24719841	24751839	NovelTID_00000474	chr6	131745294	131774067	N
chr10	24748085	24782897	NovelTID_00000897	chr6	131721074	131746219	N
chr10	24748085	24817976	NovelTID_00000898	chr6	131678829	131746219	N
chr10	24748085	24817976	NovelTID_00000899	chr6	131678829	131746219	N
chr10	24769775	24817976	NovelTID_00000901	chr6	131678829	131735356	N
chr10	24783188	24817976	NovelTID_00000902	chr6	131678829	131712061	N
chr10	25256191	25393149	KnowTID_00000679	chr6	131037350	131148297	N
chr10	25404331	25423233	NovelTID_00000476	chr6	131003053	131016609	N
chr10	25404331	25423233	NovelTID_00000477	chr6	131003053	131016609	N
chr10	25417798	25419284	KnowTID_00000906	chr6	131007321	131008844	N
chr10	25499119	25557243	KnowTID_00000907	chr6	130902729	130933413	Y
chr10	26430034	26431436	KnowTID_00000680	chr6	130072860	130073928	N
chr10	26466512	26468087	KnowTID_00000681	chr6	130054790	130055480	N
chr10	28920295	28924162	NovelTID_00000478	chr6	127790643	127792010	N
chr10	28926069	28929095	KnowTID_00000682	chr6	127783248	127786781	Y
chr10	28928202	28930710	KnowTID_00000683	chr6	127781555	127784297	N
chr10	29632041	29634256	KnowTID_00000685	chr6	127026973	127029345	N
chr10	29650406	29652324	KnowTID_00000686	chr6	127001834	127016607	N
chr10	29707930	29720414	NovelTID_00000906	chr6	126954973	126968994	N
chr10	30092723	30095367	KnowTID_00000687	chr3	12610367	12625212	N
chr10	30231565	30233929	KnowTID_00000909	chr6	126390248	126392883	N
chr10	30250719	30251836	KnowTID_00000910	chr6	126362797	126363915	N
chr10	30964827	30967200	KnowTID_00000911	chr6	125682223	125682726	N
chr10	31168062	31171888	KnowTID_00000912	chr6	125466587	125469888	N
chr10	31213840	31216742	KnowTID_00000913	chr6	125410517	125412941	N
chr10	32800359	32803237	KnowTID_00000688	chr6	123958226	123960779	Y
chr10	33709588	33712046	KnowTID_00000915	chr6	116923241	116923778	N
chr10	33950024	33953579	KnowTID_00000916	chr6	116657187	116659157	N
chr10	33962618	33965395	KnowTID_00000917	chr6	116648453	116650961	N
chr10	33986816	33989766	NovelTID_00000480	chr6	116627728	116633269	N
chr10	34620278	34620659	NovelTID_00000481	chr6	116005484	116006197	N
chr10	35198632	35205202	KnowTID_00000918	chr6	115494109	115496365	N
chr10	35519407	35558471	NovelTID_00000907	chr6	115214071	115233206	N
chr10	36907413	37898838	KnowTID_00000919	chr6	113171379	114132505	N
chr10	37039175	37052985	NovelTID_00000482	chr6	113956663	113970654	N
chr10	37057291	37099458	KnowTID_00000690	chr6	113906854	113953554	N
chr10	37074654	37076872	KnowTID_00000691	chr6	113933609	113935674	N
chr10	37080320	37099949	KnowTID_00000921	chr6	113906372	113929551	N
chr10	37835914	37841856	NovelTID_00000909	chr6	113228203	113234068	N
chr10	38014879	38033652	KnowTID_00000922	chr6	113042780	113083421	N
chr10	38889270	38893058	KnowTID_00000923	chr6	112362416	112368258	N
chr10	39883212	39890845	NovelTID_00000484	chr6	111387675	111392254	N
chr10	39883879	39890845	NovelTID_00000485	chr6	111387675	111392000	N
chr10	39883879	39890845	NovelTID_00000486	chr6	111387675	111392000	N
chr10	39883879	39896108	NovelTID_00000487	chr6	111381134	111392000	N
chr10	39883879	39896108	NovelTID_00000488	chr6	111381134	111392000	N
chr10	39883879	39896108	NovelTID_00000489	chr6	111381134	111392000	N
chr10	39891544	39896108	NovelTID_00000490	chr6	111381134	111386699	N
chr10	40230085	40231364	NovelTID_00000491	chr6	110868741	110869766	N
chr10	41057415	41061180	NovelTID_00000492	chr6	109962223	109965844	Y
chr10	41103353	41104035	NovelTID_00000493	chr6	109884702	109885289	Y
chr10	41752128	41752867	NovelTID_00000911	chr6	109154421	109155628	N
chr10	41776861	41788409	NovelTID_00000912	chr6	109105983	109120379	Y
chr10	41790504	41793412	KnowTID_00000926	chr6	109100105	109103805	Y
chr10	41809415	41810007	KnowTID_00000696	chr6	109088920	109089030	Y
chr10	42273838	42278378	NovelTID_00000494	chr6	108513300	108517841	N
chr10	42574673	42576489	KnowTID_00000927	chr6	108149265	108150146	N
chr10	42691088	42710968	KnowTID_00000928	chr6	107992646	108014088	N
chr10	42695569	42697484	KnowTID_00000929	chr6	108008917	108010485	N
chr10	42932526	42934637	KnowTID_00000698	chr6	107788760	107790530	N
chr10	42940026	42941188	KnowTID_00000930	chr6	107780862	107781891	N
chr10	43379123	43383304	KnowTID_00000699	chr6	107303610	107304708	N
chr10	43432578	43449071	NovelTID_00000913	chr6	107213792	107232529	N
chr10	43460006	43461806	NovelTID_00000914	chr6	107197526	107199089	N
chr10	43465963	43485642	KnowTID_00000700	chr6	107178664	107194179	Y
chr10	43510297	43513839	NovelTID_00000915	chr6	107164019	107164753	N
chr10	43546385	43553107	KnowTID_00000701	chr6	107139371	107143049	N
chr10	43789219	43795377	NovelTID_00000495	chr6	106890187	106896098	N
chr10	43832341	43868840	NovelTID_00000916	chr6	106808434	106846675	Y
chr10	43987549	43988140	KnowTID_00000931	chr6	106773698	106774164	N
chr10	44116583	44121433	NovelTID_00000917	chr6	106592726	106596977	N
chr10	44285403	44287245	KnowTID_00000932	chr6	106388751	106389364	N
chr10	44317694	44321980	KnowTID_00000933	chr6	106348222	106351693	N
chr10	44416985	44419737	KnowTID_00000702	chr6	106244582	106247198	N
chr10	44435363	44438911	KnowTID_00000703	chr6	106226047	106229975	N
chr10	44622540	44623267	NovelTID_00000919	chr6	106020638	106020758	N
chr10	44722698	44724459	NovelTID_00000496	chr6	105928793	105930891	Y
chr10	44744111	44748123	NovelTID_00000497	chr6	105896353	105904011	N
chr10	44744111	44748123	NovelTID_00000498	chr6	105896353	105904011	N
chr10	44786217	44786884	KnowTID_00000934	chr6	105851081	105852130	N
chr10	44899404	44904106	KnowTID_00000705	chr6	105705749	105708967	N
chr10	44899404	44904106	KnowTID_00000706	chr6	105705749	105708967	N
chr10	45527369	45529737	KnowTID_00000707	chr6	105133246	105134806	N
chr10	45527509	45571824	KnowTID_00000708	chr6	105085039	105134662	N
chr10	46735371	46755257	NovelTID_00000920	chr6	104091986	104115484	N
chr10	48588383	48590051	KnowTID_00000713	chr6	102710237	102718762	N
chr10	48814652	48817252	KnowTID_00000937	chr6	102519668	102520401	Y
chr10	49508632	49509973	KnowTID_00000714	chr6	101840080	101841502	N
chr10	49511366	49514575	KnowTID_00000715	chr6	101836696	101838497	N
chr10	49527957	49530906	KnowTID_00000938	chr6	101826113	101828598	N
chr10	49699839	49701687	KnowTID_00000939	chr6	101746099	101749064	N
chr10	50611200	50614347	KnowTID_00000941	chr6	100912958	100916411	N
chr10	51240668	51244455	NovelTID_00000921	chr2	100047800	100050896	N
chr10	51386794	51395637	KnowTID_00000719	chr6	117185096	117193539	N
chr10	51477062	51480821	KnowTID_00000720	chr6	117265048	117266930	N
chr10	51492176	51495648	NovelTID_00000922	chr6	117279354	117281566	N
chr10	52900875	52901512	NovelTID_00000501	chr6	118699005	118699765	N
chr10	52900875	52939127	NovelTID_00000502	chr6	118699005	118707104	N
chr10	52954992	52980542	KnowTID_00000722	chr6	118737748	118770092	N
chr10	53129687	53144078	KnowTID_00000723	chr6	119003911	119021636	N
chr10	53218248	53220479	KnowTID_00000944	chr6	119085792	119086166	N
chr10	53220334	53238795	KnowTID_00000945	chr6	119085998	119107105	N
chr10	53517829	53523335	KnowTID_00000946	chr6	119433170	119434367	N
chr10	53795727	53800887	KnowTID_00000724	chr6	119671110	119676465	N
chr10	55604822	55649850	NovelTID_00000923	chr6	121276168	121310301	N
chr10	56224306	56225093	KnowTID_00000725	chr12	117013772	117014402	N
chr10	56300658	56301666	KnowTID_00000726	chr6	121988486	121989876	N
chr10	56629412	56634571	KnowTID_00000947	chr6	122241410	122247372	N
chr10	56629412	56634571	KnowTID_00000948	chr6	122241410	122247372	N
chr10	56652298	56702037	NovelTID_00000924	chr6	122264873	122333197	N
chr10	56691794	56695721	NovelTID_00000925	chr6	122321404	122326160	N
chr10	56691794	56695721	NovelTID_00000926	chr6	122321404	122326160	N
chr10	56691794	56701754	NovelTID_00000927	chr6	122321404	122332563	N
chr10	56691794	56701754	NovelTID_00000928	chr6	122321404	122332563	N
chr10	56691794	56701754	NovelTID_00000929	chr6	122321404	122332563	N
chr10	56691794	56701754	NovelTID_00000930	chr6	122321404	122332563	N
chr10	56691794	56701754	NovelTID_00000931	chr6	122321404	122332563	N
chr10	56691794	56701754	NovelTID_00000932	chr6	122321404	122332563	N
chr10	56691794	56701754	NovelTID_00000933	chr6	122321404	122332563	N
chr10	56691794	56701754	NovelTID_00000934	chr6	122321404	122332563	N
chr10	56691794	56701754	NovelTID_00000935	chr6	122321404	122332563	N
chr10	56691794	56701754	NovelTID_00000936	chr6	122321404	122332563	N
chr10	56691794	56701754	NovelTID_00000937	chr6	122321404	122332563	N
chr10	56691794	56701754	NovelTID_00000938	chr6	122321404	122332563	N
chr10	56691794	56701754	NovelTID_00000939	chr6	122321404	122332563	N
chr10	56691794	56701754	NovelTID_00000940	chr6	122321404	122332563	N
chr10	56691794	56702037	NovelTID_00000941	chr6	122321404	122333197	N
chr10	56691794	56702037	NovelTID_00000942	chr6	122321404	122333197	N
chr10	56691794	56702037	NovelTID_00000943	chr6	122321404	122333197	N
chr10	56691794	56702037	NovelTID_00000944	chr6	122321404	122333197	N
chr10	56691794	56702037	NovelTID_00000945	chr6	122321404	122333197	N
chr10	56691794	56702037	NovelTID_00000946	chr6	122321404	122333197	N
chr10	56691794	56702037	NovelTID_00000947	chr6	122321404	122333197	N
chr10	56691794	56702037	NovelTID_00000948	chr6	122321404	122333197	N
chr10	56692370	56702037	NovelTID_00000949	chr6	122321883	122333197	N
chr10	56692370	56702037	NovelTID_00000950	chr6	122321883	122333197	N
chr10	56693113	56701754	NovelTID_00000951	chr6	122322609	122332563	N
chr10	56693113	56701754	NovelTID_00000952	chr6	122322609	122332563	N
chr10	56693113	56701754	NovelTID_00000953	chr6	122322609	122332563	N
chr10	56693113	56701754	NovelTID_00000954	chr6	122322609	122332563	N
chr10	56696064	56702037	NovelTID_00000955	chr6	122326420	122333197	N
chr10	56697239	56702037	NovelTID_00000956	chr6	122326556	122333197	N
chr10	56707840	56711604	NovelTID_00000957	chr6	122341640	122347115	N
chr10	56712033	56719295	NovelTID_00000958	chr6	122347637	122353377	N
chr10	56836953	56856226	NovelTID_00000503	chr6	122452399	122466037	N
chr10	56836953	56884099	NovelTID_00000504	chr6	122452399	122483945	N
chr10	56836953	56884099	NovelTID_00000505	chr6	122452399	122483945	N
chr10	56841792	56884099	NovelTID_00000506	chr6	122457866	122483945	N
chr10	56841792	56884099	NovelTID_00000507	chr6	122457866	122483945	N
chr10	57012242	57024840	NovelTID_00000508	chr6	122586980	122595296	N
chr10	57198186	57206159	KnowTID_00000949	chr6	122713264	122720756	N
chr10	59382822	59383642	KnowTID_00000952	chr10	74069941	74070282	N
chr10	59615591	59624672	NovelTID_00000960	chr10	73795535	73799935	N
chr10	60494050	60500828	KnowTID_00000729	chr10	72698829	72700644	N
chr10	60500594	60514636	KnowTID_00000954	chr10	72686292	72696259	N
chr10	60500594	60514636	KnowTID_00000955	chr10	72686292	72696259	N
chr10	60505719	60514636	KnowTID_00000956	chr10	72686292	72696259	N
chr10	60505719	60514636	KnowTID_00000957	chr10	72686292	72696259	N
chr10	60891620	60891995	KnowTID_00000730	chr10	72187407	72187811	Y
chr10	61053988	61054965	KnowTID_00000731	chr10	72051247	72052293	N
chr10	61486151	61488363	KnowTID_00000732	chr10	71516518	71518627	N
chr10	61993390	61994736	NovelTID_00000510	chr10	70820605	70821329	N
chr10	65338535	65370987	KnowTID_00000959	chr10	66577302	66606888	N
chr10	65583356	65586812	KnowTID_00000960	chr10	66297626	66299939	N
chr10	66160988	66168709	KnowTID_00000734	chr10	65711959	65733299	N
chr10	66295799	66308327	NovelTID_00000963	chr10	65591258	65605655	N
chr10	66299305	66300051	NovelTID_00000964	chr10	65601530	65602143	N
chr10	66299305	66307129	NovelTID_00000965	chr10	65591258	65602143	N
chr10	66374892	66380610	KnowTID_00000961	chr10	65474502	65477975	N
chr10	66375236	66383006	KnowTID_00000962	chr10	65473608	65477165	N
chr10	66378383	66380487	KnowTID_00000963	chr10	65474502	65476332	N
chr10	66403234	66407125	NovelTID_00000511	chr10	65452053	65456155	N
chr10	66947135	66948799	KnowTID_00000964	chr10	64628073	64629419	N
chr10	66959106	66960455	KnowTID_00000965	chr10	64616517	64617009	N
chr10	66960502	66973071	NovelTID_00000966	chr10	64606469	64616471	N
chr10	66966287	66974164	NovelTID_00000512	chr10	64605361	64613242	N
chr10	66968375	66974164	NovelTID_00000513	chr10	64605361	64611015	N
chr10	67031269	67034737	KnowTID_00000966	chr10	64533493	64538311	N
chr10	67031963	67034707	KnowTID_00000967	chr10	64533523	64537771	N
chr10	67049137	67054259	NovelTID_00000514	chr10	64508753	64515565	N
chr10	67083219	67086442	NovelTID_00000515	chr10	64481999	64484791	N
chr10	67165783	67168313	NovelTID_00000517	chr10	64388147	64392327	N
chr10	67170585	67172216	KnowTID_00000735	chr10	64383952	64386086	N
chr10	67171367	67180787	KnowTID_00000968	chr10	64374377	64385570	N
chr10	67248491	67249441	KnowTID_00000736	chr10	64273867	64278437	N
chr10	67400885	67407277	NovelTID_00000519	chr10	64062001	64077438	N
chr10	67400885	67407277	NovelTID_00000520	chr10	64062001	64077438	N
chr10	67425226	67436456	KnowTID_00000969	chr10	64034886	64044597	N
chr10	67544209	67544668	NovelTID_00000967	chr10	63868777	63869738	N
chr10	67775755	67789726	KnowTID_00000737	chr10	63622016	63635692	N
chr10	67781820	67783890	KnowTID_00000970	chr10	63626892	63630218	N
chr10	67787693	67790071	KnowTID_00000971	chr10	63621819	63623324	N
chr10	68366951	68367238	KnowTID_00000972	chr10	63042969	63043326	N
chr10	68483487	68496636	KnowTID_00000973	chr10	62870783	62885971	N
chr10	68789927	68790919	KnowTID_00000975	chr10	62569871	62570243	N
chr10	68901752	68902488	KnowTID_00000976	chr10	62428049	62428375	N
chr10	69701765	69706086	NovelTID_00000969	chr10	61471554	61473802	N
chr10	69827994	69831366	KnowTID_00000738	chr10	61238899	61239736	N
chr10	69830445	69831366	KnowTID_00000739	chr10	61238899	61239736	N
chr10	70201519	70202776	NovelTID_00000970	chr10	60778726	60779697	N
chr10	70631484	70644800	KnowTID_00000977	chr10	60236851	60266623	N
chr10	70633581	70644800	KnowTID_00000978	chr10	60236851	60263197	N
chr10	70637502	70644787	KnowTID_00000979	chr10	60236851	60246410	N
chr10	70664492	70667235	KnowTID_00000740	chr10	60204140	60204518	N
chr10	70748436	70754991	NovelTID_00000523	chr10	60086051	60087638	Y
chr10	70750672	70754991	NovelTID_00000524	chr10	60086051	60087638	Y
chr10	70808904	70810380	KnowTID_00000980	chr10	60027775	60028140	N
chr10	72408310	72411029	KnowTID_00000742	chr10	57606214	57606527	N
chr10	72408310	72411029	KnowTID_00000743	chr10	57606214	57606527	N
chr10	72436050	72549453	KnowTID_00000982	chr10	57391790	57553908	N
chr10	74328226	74329643	KnowTID_00000983	chr10	55318909	55319430	N
chr10	75093951	75098114	NovelTID_00000971	chr22	24586301	24587963	N
chr10	75093951	75098114	NovelTID_00000972	chr22	24586301	24587963	N
chr10	75096376	75097460	NovelTID_00000973	chr22	24586929	24587963	N
chr10	75298720	75300169	KnowTID_00000985	chr22	24256245	24256532	Y
chr10	75808196	75809907	KnowTID_00000744	chr21	47877600	47878679	Y
chr10	76147176	76149548	KnowTID_00000745	chr21	47448073	47448862	N
chr10	76429104	76457254	NovelTID_00000974	chr21	47004769	47058821	N
chr10	76896251	76898413	NovelTID_00000527	chr21	46474989	46477321	N
chr10	76896251	76899847	NovelTID_00000528	chr21	46473608	46477321	N
chr10	76896251	76914014	NovelTID_00000975	chr21	46460758	46477321	N
chr10	76933330	76934638	NovelTID_00000529	chr21	46411733	46412305	N
chr10	77356164	77358856	KnowTID_00000748	chr21	45886231	45886694	N
chr10	77368622	77369170	NovelTID_00000530	chr21	45871955	45872517	N
chr10	77711018	77726777	NovelTID_00000978	chr21	45420414	45427365	N
chr10	77711689	77723089	NovelTID_00000979	chr21	45420414	45427365	N
chr10	77932559	77934001	KnowTID_00000989	chr21	45121639	45122907	N
chr10	78061866	78064619	KnowTID_00000750	chr19	15202952	15203455	N
chr10	79229819	79232728	NovelTID_00000532	chr19	663361	665073	N
chr10	80591722	80593431	KnowTID_00000757	chr19	4077316	4078629	N
chr10	81666607	81668062	NovelTID_00000535	chr19	4224346	4224505	N
chr10	81778119	81779304	KnowTID_00000994	chr2	27760263	27760620	N
chr10	82253645	82268166	KnowTID_00000996	chr12	104566932	104601405	N
chr10	82813351	82814411	NovelTID_00000537	chr12	105358689	105359188	N
chr10	83005938	83006611	KnowTID_00000998	chr12	105500698	105501402	Y
chr10	83266897	83272156	NovelTID_00000538	chr12	105802579	105806311	N
chr10	83267489	83272156	NovelTID_00000539	chr12	105803203	105806311	N
chr10	83350846	83364493	NovelTID_00000540	chr12	105900697	105919489	N
chr10	83392744	83398670	NovelTID_00000541	chr12	105969680	105979904	N
chr10	83392744	83399146	NovelTID_00000542	chr12	105969680	105980216	N
chr10	83399307	83399887	NovelTID_00000982	chr12	105980377	105981011	N
chr10	83426163	83430749	NovelTID_00000983	chr12	106015227	106032583	N
chr10	83455472	83467605	KnowTID_00000999	chr12	106062089	106080620	N
chr10	83499304	83563442	KnowTID_00001000	chr12	106115198	106195150	N
chr10	83564664	83569728	NovelTID_00000984	chr12	106196142	106202285	N
chr10	83567006	83570583	NovelTID_00000985	chr12	106200041	106205931	N
chr10	83567773	83569728	NovelTID_00000986	chr12	106200750	106202285	N
chr10	83920528	83921877	NovelTID_00000543	chr12	106547525	106549016	N
chr10	83920636	83943257	NovelTID_00000544	chr12	106547633	106588968	N
chr10	83929750	83934386	NovelTID_00000545	chr12	106572502	106574714	N
chr10	83980789	83986015	KnowTID_00000766	chr12	106625034	106628293	N
chr10	84009091	84017130	KnowTID_00001001	chr12	106666760	106671969	N
chr10	84010161	84016083	KnowTID_00001002	chr12	106667334	106670746	N
chr10	84010942	84017130	KnowTID_00001003	chr12	106668307	106671969	N
chr10	84214910	84217988	KnowTID_00001004	chr12	106972109	106975731	N
chr10	84683686	84729137	KnowTID_00001006	chr12	107525577	107572863	N
chr10	84691792	84729137	KnowTID_00001007	chr12	107537878	107572863	N
chr10	84801073	84802361	NovelTID_00000546	chr12	107655280	107656689	N
chr10	85166005	85167252	NovelTID_00000988	chr12	9582997	9583353	N
chr10	85276808	85278488	NovelTID_00000547	chr12	9582669	9583353	Y
chr10	85292563	85296235	KnowTID_00000767	chr12	104345209	104350439	N
chr10	85989817	85994018	NovelTID_00000989	chr12	31253229	31254065	N
chr10	85995064	85997865	NovelTID_00000990	chr12	31244635	31246224	N
chr10	85995617	85997865	NovelTID_00000991	chr12	31244635	31245027	N
chr10	86124930	86126700	NovelTID_00000548	chr12	31244635	31245012	Y
chr10	86127239	86127888	NovelTID_00000549	chr12	31246171	31246333	N
chr10	86693504	86701985	KnowTID_00000768	chr12	103682297	103695551	N
chr10	86757110	86760294	NovelTID_00000551	chr12	103612073	103612596	N
chr10	87193027	87212537	NovelTID_00000993	chr12	102997097	103043183	N
chr10	87240031	87249691	NovelTID_00000994	chr12	102951363	102957238	N
chr10	87240031	87261061	NovelTID_00000995	chr12	102939962	102957238	N
chr10	87247403	87253832	NovelTID_00000552	chr12	102946014	102953189	N
chr10	87429415	87430762	KnowTID_00000769	chr18	657727	673015	Y
chr10	87500969	87502424	KnowTID_00001008	chr12	102642920	102645305	N
chr10	88337344	88338546	KnowTID_00001009	chr12	101623496	101624981	N
chr10	88779791	88790022	NovelTID_00000997	chr12	101127607	101133927	Y
chr10	88798304	88807507	KnowTID_00001010	chr12	101111192	101117245	Y
chr10	88849844	88850953	NovelTID_00000554	chr12	101053289	101055268	N
chr10	89149113	89150607	KnowTID_00000773	chr12	100659692	100660845	Y
chr10	89149115	89152108	KnowTID_00000774	chr12	100649791	100660843	Y
chr10	89199517	89203938	KnowTID_00001011	chr12	100538506	100542712	N
chr10	90671240	90683364	KnowTID_00001012	chr12	98837189	98861922	N
chr10	90964047	90965878	KnowTID_00001013	chr12	98583954	98585746	N
chr10	91351573	91416325	KnowTID_00000775	chr12	98133592	98191373	N
chr10	91614694	91617812	KnowTID_00001014	chr12	97866716	97870018	Y
chr10	91618595	91621874	KnowTID_00001015	chr12	97862428	97865858	N
chr10	91634045	91838118	KnowTID_00001016	chr12	97631758	97850291	N
chr10	91863758	91880240	KnowTID_00000776	chr12	97584530	97607962	N
chr10	92106835	92114479	KnowTID_00000777	chr12	97381798	97388995	N
chr10	92546929	92556175	NovelTID_00000555	chr12	96866052	96879477	N
chr10	92595281	92598577	NovelTID_00000998	chr12	96823896	96830029	N
chr10	92621815	92623251	NovelTID_00000999	chr12	96794485	96795995	N
chr10	92780147	92785468	KnowTID_00000778	chr12	96569352	96580505	N
chr10	92798976	92811624	KnowTID_00000779	chr12	96545076	96559190	N
chr10	92915466	92915842	NovelTID_00001000	chr12	96429751	96433403	N
chr10	93359902	93364701	KnowTID_00000780	chr12	95829330	95836263	N
chr10	93692709	93696390	NovelTID_00001001	chr12	95353573	95355992	N
chr10	93697489	93701362	NovelTID_00001002	chr12	95344889	95351452	N
chr10	94136237	94151358	KnowTID_00001019	chr12	94853768	94868889	Y
chr10	94136456	94139156	KnowTID_00001020	chr12	94867904	94868889	Y
chr10	94138807	94139199	KnowTID_00000781	chr12	94867904	94868061	Y
chr10	94148449	94151364	KnowTID_00001021	chr12	94853762	94856170	Y
chr10	94485366	94486157	NovelTID_00000558	chr12	94452447	94453754	N
chr10	94579012	94580365	KnowTID_00001022	chr12	94329712	94330605	N
chr10	94583215	94608459	KnowTID_00001023	chr12	94285890	94324528	N
chr10	94798909	94825850	KnowTID_00000782	chr12	94018044	94047057	N
chr10	94820612	94825944	KnowTID_00000783	chr12	94017913	94031295	N
chr10	94880008	94891274	KnowTID_00000784	chr12	93956591	93964233	Y
chr10	94905381	94916062	KnowTID_00001025	chr12	93923834	93931265	N
chr10	94905381	94923855	KnowTID_00001026	chr12	93915433	93931265	N
chr10	94905381	94923855	KnowTID_00001027	chr12	93915433	93931265	N
chr10	94906056	94916062	KnowTID_00001028	chr12	93923834	93931265	N
chr10	94906056	94923855	KnowTID_00001029	chr12	93915433	93931265	N
chr10	94906056	94923855	KnowTID_00001030	chr12	93915433	93931265	N
chr10	94918901	94921672	KnowTID_00000785	chr12	93918501	93919826	N
chr10	95176636	95180141	KnowTID_00001031	chr12	93570503	93570915	N
chr10	95181004	95182977	KnowTID_00001032	chr12	93568540	93569484	N
chr10	95182118	95185134	KnowTID_00001033	chr12	93565581	93569244	N
chr10	95193860	95201987	KnowTID_00000787	chr12	93552478	93555849	N
chr10	95226255	95229115	KnowTID_00001034	chr12	93530406	93532347	N
chr10	95289021	95306725	NovelTID_00001003	chr12	93436132	93454410	N
chr10	95289021	95306725	NovelTID_00001004	chr12	93436132	93454410	N
chr10	95289021	95306725	NovelTID_00001005	chr12	93436132	93454410	N
chr10	95289021	95306725	NovelTID_00001006	chr12	93436132	93454410	N
chr10	95289021	95306725	NovelTID_00001007	chr12	93436132	93454410	N
chr10	95307760	95310707	NovelTID_00001008	chr12	93428765	93434229	N
chr10	95355168	95359921	KnowTID_00000788	chr12	93380543	93383129	N
chr10	95355168	95359921	KnowTID_00000789	chr12	93380543	93383129	N
chr10	95355168	95359921	KnowTID_00000790	chr12	93380543	93383129	N
chr10	95355168	95359921	KnowTID_00000791	chr12	93380543	93383129	N
chr10	95643975	95645285	NovelTID_00000559	chr12	92986768	92988108	N
chr10	95662757	95683514	NovelTID_00000560	chr12	92956640	92973968	N
chr10	95688840	95711342	KnowTID_00000792	chr12	92918809	92950291	N
chr10	95727239	95742711	NovelTID_00000561	chr12	92886222	92899319	N
chr10	95729018	95755498	NovelTID_00000562	chr12	92876007	92897242	Y
chr10	95729018	95755498	NovelTID_00000563	chr12	92876007	92897242	Y
chr10	95786887	95798067	NovelTID_00001009	chr12	92837407	92844667	N
chr10	95814926	95854929	NovelTID_00001010	chr12	92764735	92820201	Y
chr10	95819860	95825110	NovelTID_00000564	chr12	92813917	92818739	Y
chr10	95829163	95830678	NovelTID_00001011	chr12	92805699	92806939	N
chr10	95943719	95950696	NovelTID_00000565	chr12	92679988	92682174	N
chr10	95958354	95986614	KnowTID_00001036	chr12	92642439	92671712	N
chr10	95985563	95986598	KnowTID_00001037	chr12	92642455	92643149	N
chr10	96047700	96058491	NovelTID_00001012	chr12	92568728	92580400	N
chr10	96064167	96067511	KnowTID_00001038	chr12	92560249	92561298	Y
chr10	96064167	96067511	KnowTID_00001039	chr12	92560249	92561298	Y
chr10	96114479	96117090	KnowTID_00000793	chr12	92492735	92496240	N
chr10	96498401	96523693	KnowTID_00000794	chr12	92058963	92085870	N
chr10	96850841	96864728	NovelTID_00001013	chr12	91669513	91703050	N
chr10	96885570	96888555	KnowTID_00001040	chr12	91641451	91644080	N
chr10	97053617	97059565	KnowTID_00001041	chr12	91461100	91467791	N
chr10	98000111	98031670	KnowTID_00000796	chr12	90437935	90466739	N
chr10	98116432	98162342	KnowTID_00001042	chr12	90332093	90371749	N
chr10	98296642	98343476	NovelTID_00001014	chr12	90150098	90196790	N
chr10	98296642	98343476	NovelTID_00001015	chr12	90150098	90196790	N
chr10	98299135	98335064	NovelTID_00001016	chr12	90159893	90194825	N
chr10	98334308	98335064	NovelTID_00001017	chr12	90159893	90160714	N
chr10	98502107	98504077	KnowTID_00000797	chr12	49194606	49195041	N
chr10	98565851	98569598	NovelTID_00001018	chr12	89919919	89923166	Y
chr10	98679217	98691405	NovelTID_00001019	chr12	89777917	89789646	N
chr10	98679336	98682564	NovelTID_00001020	chr12	89787069	89789646	N
chr10	98682255	98691405	NovelTID_00001021	chr12	89777917	89787340	N
chr10	98683060	98686526	NovelTID_00001022	chr12	89782968	89786421	N
chr10	98684938	98687649	NovelTID_00001023	chr12	89782893	89784757	N
chr10	98695699	98697206	NovelTID_00000566	chr12	89772593	89773409	N
chr10	98695699	98701173	NovelTID_00000567	chr12	89768451	89773409	N
chr10	98695699	98701638	NovelTID_00000568	chr12	89768003	89773409	N
chr10	98697209	98701638	NovelTID_00000569	chr12	89768003	89772079	N
chr10	98700648	98704821	NovelTID_00001024	chr12	89764914	89768469	N
chr10	98736868	98741696	NovelTID_00000570	chr12	89729278	89734343	N
chr10	98761521	98818784	KnowTID_00000798	chr12	89657396	89710826	N
chr10	98912826	98923406	NovelTID_00001025	chr12	89555887	89560981	N
chr10	98912826	98923406	NovelTID_00001026	chr12	89555887	89560981	N
chr10	98918263	98922916	NovelTID_00001027	chr12	89556392	89559034	N
chr10	98918294	98922899	NovelTID_00001028	chr12	89556415	89559034	N
chr10	98919216	98922899	NovelTID_00001029	chr12	89556415	89559034	N
chr10	98922429	98924446	NovelTID_00000571	chr12	89555036	89556886	N
chr10	98922429	98952849	NovelTID_00000572	chr12	89522323	89556886	N
chr10	98922451	98953227	NovelTID_00000573	chr12	89522323	89556862	N
chr10	98922451	98953227	NovelTID_00000574	chr12	89522323	89556862	N
chr10	99071804	99120768	KnowTID_00000799	chr12	89363604	89417557	N
chr10	99375731	99380052	NovelTID_00000575	chr12	89116855	89119775	N
chr10	99375756	99380052	NovelTID_00000576	chr12	89116855	89119750	N
chr10	99383218	99415791	NovelTID_00000577	chr12	89050320	89114323	Y
chr10	99385824	99388668	NovelTID_00000578	chr12	89085979	89112091	N
chr10	100170168	100204269	KnowTID_00001045	chr12	88242867	88262908	N
chr10	101878516	101880231	KnowTID_00000800	chr12	86349929	86351466	N
chr10	102194805	102196653	NovelTID_00000579	chr12	85973882	85975037	N
chr10	102797362	102819736	NovelTID_00000580	chr12	85318362	85338782	N
chr10	102970001	103029199	KnowTID_00000801	chr12	85146624	85182405	N
chr10	105011614	105020930	KnowTID_00000802	chr12	83073666	83080558	N
chr10	105511282	105516132	KnowTID_00000803	chr12	82527850	82529413	N
chr10	106637871	106642630	KnowTID_00001049	chr12	81389975	81394072	N
chr10	106703675	106708855	NovelTID_00001030	chr12	81331562	81336835	Y
chr10	107383700	107414888	KnowTID_00000804	chr12	80512117	80557415	N
chr10	107714988	107716515	NovelTID_00001032	chr12	80167534	80169074	Y
chr10	107879901	107882602	NovelTID_00001033	chr12	79943329	79945260	N
chr10	107881273	107882443	NovelTID_00001034	chr12	79943382	79944467	N
chr10	107883661	107886117	KnowTID_00000805	chr12	79932467	79941512	N
chr10	107922144	107923670	KnowTID_00001050	chr12	79880596	79881454	N
chr10	108448738	108451471	KnowTID_00000806	chr12	79255650	79257720	N
chr10	109085834	109086594	KnowTID_00000807	chr12	78637210	78638275	N
chr10	109440947	109445532	KnowTID_00001051	chr12	78215477	78223632	N
chr10	109444965	109448486	KnowTID_00001052	chr12	78215398	78216052	N
chr10	109515746	109518023	KnowTID_00001053	chr12	78122116	78123993	N
chr10	109536874	109539960	KnowTID_00001054	chr12	78090623	78091372	N
chr10	109577762	109579045	KnowTID_00001055	chr12	78044502	78045493	N
chr10	109578581	109581235	KnowTID_00001056	chr12	78042445	78044682	N
chr10	109591323	109594885	KnowTID_00001057	chr12	78018478	78025528	N
chr10	109618285	109620696	KnowTID_00001058	chr12	77996400	77998747	N
chr10	109641049	109644470	KnowTID_00001059	chr12	77976192	77979272	N
chr10	109651770	109652817	KnowTID_00001060	chr12	77967018	77967657	N
chr10	109816563	109818717	KnowTID_00001061	chr12	77789351	77791291	N
chr10	109891743	109892900	KnowTID_00001062	chr12	77718764	77719961	N
chr10	110037705	110053017	KnowTID_00000809	chr12	77582810	77607168	N
chr10	110080455	110084827	NovelTID_00001035	chr12	77550113	77554789	N
chr10	110511213	110520575	NovelTID_00001036	chr12	77043874	77059782	N
chr10	110511213	110520575	NovelTID_00001037	chr12	77043874	77059782	N
chr10	110584678	110590473	NovelTID_00001038	chr12	76957071	76959427	N
chr10	110768853	110773476	NovelTID_00000582	chr12	76665766	76666399	N
chr10	110774179	110784241	KnowTID_00000810	chr12	76653928	76663723	N
chr10	111019876	111047582	NovelTID_00000583	chr12	76291607	76328792	N
chr10	111019876	111047582	NovelTID_00000584	chr12	76291607	76328792	N
chr10	111019876	111048022	NovelTID_00000585	chr12	76291321	76328792	N
chr10	111019876	111048022	NovelTID_00000586	chr12	76291321	76328792	N
chr10	111023774	111031329	KnowTID_00001063	chr12	76314031	76326370	N
chr10	111031940	111036437	NovelTID_00000587	chr12	76310936	76313721	N
chr10	111031940	111047582	NovelTID_00000588	chr12	76291607	76313721	N
chr10	111031940	111047582	NovelTID_00000589	chr12	76291607	76313721	N
chr10	111031940	111047582	NovelTID_00000590	chr12	76291607	76313721	N
chr10	111031940	111047582	NovelTID_00000591	chr12	76291607	76313721	N
chr10	111031940	111048022	NovelTID_00000592	chr12	76291321	76313721	N
chr10	111031940	111048022	NovelTID_00000593	chr12	76291321	76313721	N
chr10	111031940	111048022	NovelTID_00000594	chr12	76291321	76313721	N
chr10	111031940	111048022	NovelTID_00000595	chr12	76291321	76313721	N
chr10	111032943	111036437	NovelTID_00000596	chr12	76310936	76311976	N
chr10	111032943	111047582	NovelTID_00000597	chr12	76291607	76311976	N
chr10	111032943	111047582	NovelTID_00000598	chr12	76291607	76311976	N
chr10	111032943	111047582	NovelTID_00000599	chr12	76291607	76311976	N
chr10	111032943	111047582	NovelTID_00000600	chr12	76291607	76311976	N
chr10	111032943	111048022	NovelTID_00000601	chr12	76291321	76311976	N
chr10	111032943	111048022	NovelTID_00000602	chr12	76291321	76311976	N
chr10	111032943	111048022	NovelTID_00000603	chr12	76291321	76311976	N
chr10	111032943	111048022	NovelTID_00000604	chr12	76291321	76311976	N
chr10	111033639	111036437	NovelTID_00000605	chr12	76310936	76311468	N
chr10	111033639	111047582	NovelTID_00000606	chr12	76291607	76311468	N
chr10	111033639	111047582	NovelTID_00000607	chr12	76291607	76311468	N
chr10	111033639	111047582	NovelTID_00000608	chr12	76291607	76311468	N
chr10	111033639	111047582	NovelTID_00000609	chr12	76291607	76311468	N
chr10	111033639	111048022	NovelTID_00000610	chr12	76291321	76311468	N
chr10	111033639	111048022	NovelTID_00000611	chr12	76291321	76311468	N
chr10	111033639	111048022	NovelTID_00000612	chr12	76291321	76311468	N
chr10	111033639	111048022	NovelTID_00000613	chr12	76291321	76311468	N
chr10	111044995	111047582	NovelTID_00000614	chr12	76291607	76295916	N
chr10	111044995	111047582	NovelTID_00000615	chr12	76291607	76295916	N
chr10	111044995	111048022	NovelTID_00000616	chr12	76291321	76295916	N
chr10	111044995	111048022	NovelTID_00000617	chr12	76291321	76295916	N
chr10	111291576	111311432	KnowTID_00001064	chr12	76018344	76041722	Y
chr10	111340527	111344198	KnowTID_00000811	chr12	75970764	75974210	N
chr10	112163981	112222655	KnowTID_00000812	chr12	75098579	75167021	N
chr10	112274807	112282863	KnowTID_00000813	chr12	75041444	75044484	N
chr10	112412677	112465278	KnowTID_00000815	chr12	74804685	74871886	N
chr10	114258376	114346758	NovelTID_00001039	chr12	72581145	72650839	Y
chr10	114752701	114753430	KnowTID_00000818	chr12	72147476	72148582	N
chr10	116111646	116116359	KnowTID_00000820	chr12	70513572	70515210	N
chr10	116160122	116166233	KnowTID_00001067	chr12	70424808	70432446	N
chr10	116166308	116176816	KnowTID_00000821	chr12	70392588	70424726	N
chr10	116387617	116400335	KnowTID_00000822	chr12	70113902	70132501	Y
chr10	116387617	116400335	KnowTID_00000823	chr12	70113902	70132501	Y
chr10	116387622	116396360	KnowTID_00000824	chr12	70117271	70132496	Y
chr10	116387636	116394288	KnowTID_00000825	chr12	70118504	70132482	Y
chr10	116392454	116394288	KnowTID_00000826	chr12	70118504	70120259	N
chr10	116392454	116399464	KnowTID_00000827	chr12	70114652	70120259	N
chr10	116421116	116421960	NovelTID_00001043	chr12	70095614	70098151	N
chr10	116480801	116482157	KnowTID_00000828	chr12	70004965	70006403	N
chr10	116585736	116587038	KnowTID_00000829	chr12	69862462	69864019	N
chr10	116597479	116599469	NovelTID_00000618	chr12	69853996	69856129	N
chr10	116601400	116609287	KnowTID_00001068	chr12	69841526	69851816	N
chr10	116615505	116618166	KnowTID_00000830	chr12	69834117	69837120	N
chr10	116626903	116627323	KnowTID_00001069	chr12	69825514	69825913	N
chr10	116661587	116665005	KnowTID_00000831	chr12	69750162	69753471	N
chr10	116731887	116732474	KnowTID_00001071	chr12	69739315	69739620	N
chr10	116837848	116847848	NovelTID_00001044	chr12	69592005	69606284	N
chr10	116838151	116850967	NovelTID_00001045	chr12	69590759	69606154	N
chr10	116845816	116850057	NovelTID_00001046	chr12	69590928	69593412	N
chr10	116845816	116850967	NovelTID_00001047	chr12	69590759	69593412	N
chr10	116845816	116850967	NovelTID_00001048	chr12	69590759	69593412	N
chr10	116846690	116851342	NovelTID_00001049	chr12	69590366	69593412	N
chr10	116883079	116884491	KnowTID_00001072	chr12	69522112	69532422	N
chr10	117147929	117149283	NovelTID_00001050	chr12	69201500	69201790	N
chr10	117153028	117155368	NovelTID_00001051	chr12	69181227	69181532	N
chr10	117301500	117305219	NovelTID_00000623	chr12	68978645	68985805	N
chr10	117302093	117305002	NovelTID_00000624	chr12	68978645	68985375	N
chr10	117336377	117341460	NovelTID_00000625	chr12	68942022	68952430	N
chr10	117338584	117341757	NovelTID_00000626	chr12	68941764	68945900	N
chr10	117338741	117341804	NovelTID_00000627	chr12	68933966	68945744	N
chr10	117340454	117344057	NovelTID_00000628	chr12	68931599	68943398	N
chr10	117340904	117341364	NovelTID_00000629	chr12	68942076	68942522	N
chr10	117340904	117341364	NovelTID_00000630	chr12	68942076	68942522	N
chr10	117340904	117341863	NovelTID_00000631	chr12	68933945	68942522	N
chr10	117362514	117385363	KnowTID_00000833	chr12	68883086	68905085	N
chr10	117434737	117436376	NovelTID_00001052	chr12	68829470	68830569	N
chr10	117438060	117439508	NovelTID_00001053	chr12	68827249	68827972	N
chr10	117527600	117529755	NovelTID_00000633	chr12	68768665	68770863	N
chr10	117527600	117538570	NovelTID_00000634	chr12	68760839	68770863	N
chr10	117549572	117561150	KnowTID_00000834	chr12	68741221	68750262	N
chr10	117934834	117939872	NovelTID_00000635	chr12	68443752	68474888	N
chr10	117938750	117993652	NovelTID_00001055	chr12	68383214	68444733	Y
chr10	117948521	117950379	NovelTID_00001056	chr12	68428391	68429418	N
chr10	117948521	117993652	NovelTID_00001057	chr12	68383214	68429418	Y
chr10	117950538	117951764	NovelTID_00001058	chr12	68428058	68428370	N
chr10	117962248	118000488	NovelTID_00001059	chr12	68376802	68415542	N
chr10	118155201	118156484	KnowTID_00001074	chr12	68194325	68195177	N
chr10	118241561	118242849	NovelTID_00001060	chr12	68103992	68104775	Y
chr10	118292660	118293990	KnowTID_00001076	chr12	68055139	68056441	Y
chr10	118315142	118319099	NovelTID_00000636	chr12	68025401	68031505	N
chr10	118318004	118320710	KnowTID_00001077	chr12	68023451	68026185	N
chr10	118357436	118364199	KnowTID_00001078	chr12	67982309	67990982	N
chr10	118363909	118373800	NovelTID_00000637	chr12	67977597	67982924	N
chr10	118424329	118428094	NovelTID_00001061	chr12	67928950	67930650	N
chr10	118442145	118448362	NovelTID_00000638	chr12	67909533	67915292	N
chr10	118455401	118458726	KnowTID_00001079	chr12	67899346	67900639	N
chr10	118465345	118487555	KnowTID_00001080	chr12	67853104	67890840	N
chr10	118495572	118497535	NovelTID_00001062	chr12	67842669	67844940	N
chr10	118504529	118505743	KnowTID_00000836	chr12	67834784	67835297	N
chr10	118529960	118540163	KnowTID_00000837	chr12	67809020	67819088	N
chr10	118572219	118603441	KnowTID_00001081	chr12	67752275	67780943	N
chr10	118762163	118768918	KnowTID_00000838	chr12	67582492	67589848	N
chr10	118817425	118836513	NovelTID_00001063	chr12	67513920	67532948	N
chr10	118846934	118848278	KnowTID_00001082	chr12	67502326	67503711	N
chr10	118850499	118863920	KnowTID_00000839	chr12	67485577	67497650	N
chr10	118855457	118860395	KnowTID_00001083	chr12	67489480	67491197	N
chr10	120047336	120051832	KnowTID_00000840	chr12	66054324	66057990	N
chr10	120047336	120051832	KnowTID_00000841	chr12	66054324	66057990	N
chr10	120070078	120072972	KnowTID_00001085	chr12	66026038	66030782	N
chr10	120183031	120185389	KnowTID_00001086	chr12	65902755	65904070	N
chr10	120550579	120552301	KnowTID_00001088	chr12	65433545	65435097	N
chr10	120596837	120598585	KnowTID_00001089	chr12	65385287	65386775	N
chr10	120622085	120622567	KnowTID_00001090	chr12	65363366	65363766	N
chr10	120636196	120639705	KnowTID_00001091	chr12	65343334	65347692	N
chr10	120672518	120680189	NovelTID_00001065	chr12	65298411	65305877	N
chr10	120690619	120691542	NovelTID_00001066	chr12	65289642	65289995	N
chr10	120926088	120930964	NovelTID_00000639	chr12	64981992	64984912	N
chr10	120947392	120949135	KnowTID_00000842	chr12	64958880	64960885	N
chr10	120959782	120963518	NovelTID_00000640	chr12	64935114	64935848	N
chr10	121556752	121567614	KnowTID_00000843	chr12	64128734	64139861	N
chr10	121823906	121839736	NovelTID_00000641	chr12	63606139	63615063	N
chr10	121823906	121839736	NovelTID_00000642	chr12	63606139	63615063	N
chr10	121823906	121839736	NovelTID_00000643	chr12	63606139	63615063	N
chr10	121823906	121842505	NovelTID_00000644	chr12	63604208	63615063	N
chr10	121823906	121842505	NovelTID_00000645	chr12	63604208	63615063	N
chr10	121823906	121842505	NovelTID_00000646	chr12	63604208	63615063	N
chr10	121823906	121842505	NovelTID_00000647	chr12	63604208	63615063	N
chr10	121823906	121842505	NovelTID_00000648	chr12	63604208	63615063	N
chr10	121823906	121842505	NovelTID_00000649	chr12	63604208	63615063	N
chr10	121823906	121842505	NovelTID_00000650	chr12	63604208	63615063	N
chr10	121823906	121842505	NovelTID_00000651	chr12	63604208	63615063	N
chr10	121823906	121842505	NovelTID_00000652	chr12	63604208	63615063	N
chr10	121823906	121842505	NovelTID_00000653	chr12	63604208	63615063	N
chr10	121823906	121849095	NovelTID_00000654	chr12	63589235	63615063	N
chr10	121823906	121849095	NovelTID_00000655	chr12	63589235	63615063	N
chr10	121823906	121849095	NovelTID_00000656	chr12	63589235	63615063	N
chr10	121823906	121849095	NovelTID_00000657	chr12	63589235	63615063	N
chr10	121823906	121849095	NovelTID_00000658	chr12	63589235	63615063	N
chr10	121823906	121849095	NovelTID_00000659	chr12	63589235	63615063	N
chr10	121823906	121849095	NovelTID_00000660	chr12	63589235	63615063	N
chr10	121823906	121849095	NovelTID_00000661	chr12	63589235	63615063	N
chr10	121823906	121849095	NovelTID_00000662	chr12	63589235	63615063	N
chr10	121823906	121849095	NovelTID_00000663	chr12	63589235	63615063	N
chr10	121823906	121849095	NovelTID_00000664	chr12	63589235	63615063	N
chr10	121823906	121849095	NovelTID_00000665	chr12	63589235	63615063	N
chr10	121823906	121849095	NovelTID_00000666	chr12	63589235	63615063	N
chr10	121823906	121849095	NovelTID_00000667	chr12	63589235	63615063	N
chr10	121823906	121855905	NovelTID_00000668	chr12	63576988	63615063	N
chr10	121823906	121855905	NovelTID_00000669	chr12	63576988	63615063	N
chr10	121823906	121855905	NovelTID_00000670	chr12	63576988	63615063	N
chr10	121823906	121855905	NovelTID_00000671	chr12	63576988	63615063	N
chr10	121823906	121855905	NovelTID_00000672	chr12	63576988	63615063	N
chr10	121823906	121855905	NovelTID_00000673	chr12	63576988	63615063	N
chr10	121823906	121855905	NovelTID_00000674	chr12	63576988	63615063	N
chr10	121823906	121855905	NovelTID_00000675	chr12	63576988	63615063	N
chr10	121823906	121855905	NovelTID_00000676	chr12	63576988	63615063	N
chr10	121823906	121855905	NovelTID_00000677	chr12	63576988	63615063	N
chr10	121823906	121855905	NovelTID_00000678	chr12	63576988	63615063	N
chr10	121823906	121871495	NovelTID_00000679	chr12	63557141	63615063	N
chr10	121823906	121871495	NovelTID_00000680	chr12	63557141	63615063	N
chr10	121823906	121871495	NovelTID_00000681	chr12	63557141	63615063	N
chr10	121823906	121871495	NovelTID_00000682	chr12	63557141	63615063	N
chr10	121823906	121871495	NovelTID_00000683	chr12	63557141	63615063	N
chr10	121823906	121871495	NovelTID_00000684	chr12	63557141	63615063	N
chr10	121823906	121871495	NovelTID_00000685	chr12	63557141	63615063	N
chr10	121823906	121871495	NovelTID_00000686	chr12	63557141	63615063	N
chr10	121823906	121871495	NovelTID_00000687	chr12	63557141	63615063	N
chr10	121823906	121871495	NovelTID_00000688	chr12	63557141	63615063	N
chr10	121823906	121871495	NovelTID_00000689	chr12	63557141	63615063	N
chr10	121823906	121871495	NovelTID_00000690	chr12	63557141	63615063	N
chr10	121823906	121871495	NovelTID_00000691	chr12	63557141	63615063	N
chr10	121823906	121871495	NovelTID_00000692	chr12	63557141	63615063	N
chr10	121823906	121871495	NovelTID_00000693	chr12	63557141	63615063	N
chr10	121823906	121871495	NovelTID_00000694	chr12	63557141	63615063	N
chr10	121823906	121871495	NovelTID_00000695	chr12	63557141	63615063	N
chr10	121823906	121871495	NovelTID_00000696	chr12	63557141	63615063	N
chr10	121823906	121871495	NovelTID_00000697	chr12	63557141	63615063	N
chr10	121823906	121871495	NovelTID_00000698	chr12	63557141	63615063	N
chr10	121823906	121871495	NovelTID_00000699	chr12	63557141	63615063	N
chr10	121823906	121871495	NovelTID_00000700	chr12	63557141	63615063	N
chr10	121823906	121871495	NovelTID_00000701	chr12	63557141	63615063	N
chr10	121823906	121871495	NovelTID_00000702	chr12	63557141	63615063	N
chr10	121823906	121871495	NovelTID_00000703	chr12	63557141	63615063	N
chr10	121823906	121871495	NovelTID_00000704	chr12	63557141	63615063	N
chr10	121823906	121871495	NovelTID_00000705	chr12	63557141	63615063	N
chr10	121823906	121871495	NovelTID_00000706	chr12	63557141	63615063	N
chr10	121823906	121871495	NovelTID_00000707	chr12	63557141	63615063	N
chr10	121823906	121871495	NovelTID_00000708	chr12	63557141	63615063	N
chr10	121823906	121871495	NovelTID_00000709	chr12	63557141	63615063	N
chr10	121823906	121871495	NovelTID_00000710	chr12	63557141	63615063	N
chr10	121823906	121871495	NovelTID_00000711	chr12	63557141	63615063	N
chr10	121823906	121871495	NovelTID_00000712	chr12	63557141	63615063	N
chr10	121823906	121871495	NovelTID_00000713	chr12	63557141	63615063	N
chr10	121823906	121871495	NovelTID_00000714	chr12	63557141	63615063	N
chr10	121823906	121871495	NovelTID_00000715	chr12	63557141	63615063	N
chr10	121823906	121871495	NovelTID_00000716	chr12	63557141	63615063	N
chr10	121823906	121871495	NovelTID_00000717	chr12	63557141	63615063	N
chr10	121823906	121871495	NovelTID_00000718	chr12	63557141	63615063	N
chr10	121823906	121871495	NovelTID_00000719	chr12	63557141	63615063	N
chr10	121823906	121871495	NovelTID_00000720	chr12	63557141	63615063	N
chr10	121823906	121871495	NovelTID_00000721	chr12	63557141	63615063	N
chr10	121823906	121871495	NovelTID_00000722	chr12	63557141	63615063	N
chr10	121823906	121871495	NovelTID_00000723	chr12	63557141	63615063	N
chr10	121823906	121871495	NovelTID_00000724	chr12	63557141	63615063	N
chr10	121823906	121871495	NovelTID_00000725	chr12	63557141	63615063	N
chr10	121823906	121871495	NovelTID_00000726	chr12	63557141	63615063	N
chr10	121823906	121871495	NovelTID_00000727	chr12	63557141	63615063	N
chr10	121823906	121871495	NovelTID_00000728	chr12	63557141	63615063	N
chr10	121823906	121871495	NovelTID_00000729	chr12	63557141	63615063	N
chr10	121823906	121871495	NovelTID_00000730	chr12	63557141	63615063	N
chr10	121823906	121871495	NovelTID_00000731	chr12	63557141	63615063	N
chr10	121823906	121871495	NovelTID_00000732	chr12	63557141	63615063	N
chr10	121823906	121871495	NovelTID_00000733	chr12	63557141	63615063	N
chr10	121823906	121871495	NovelTID_00000734	chr12	63557141	63615063	N
chr10	121823906	121871495	NovelTID_00000735	chr12	63557141	63615063	N
chr10	121823906	121871495	NovelTID_00000736	chr12	63557141	63615063	N
chr10	121823906	121871495	NovelTID_00000737	chr12	63557141	63615063	N
chr10	121823906	121871495	NovelTID_00000738	chr12	63557141	63615063	N
chr10	121823906	121871495	NovelTID_00000739	chr12	63557141	63615063	N
chr10	121823906	121871495	NovelTID_00000740	chr12	63557141	63615063	N
chr10	121823906	121871495	NovelTID_00000741	chr12	63557141	63615063	N
chr10	121823906	121871495	NovelTID_00000742	chr12	63557141	63615063	N
chr10	121823906	121871495	NovelTID_00000743	chr12	63557141	63615063	N
chr10	121823906	121871495	NovelTID_00000744	chr12	63557141	63615063	N
chr10	121823906	121871495	NovelTID_00000745	chr12	63557141	63615063	N
chr10	121823906	121871495	NovelTID_00000746	chr12	63557141	63615063	N
chr10	121823906	121871495	NovelTID_00000747	chr12	63557141	63615063	N
chr10	121823906	121871495	NovelTID_00000748	chr12	63557141	63615063	N
chr10	121823906	121871495	NovelTID_00000749	chr12	63557141	63615063	N
chr10	121823906	121871495	NovelTID_00000750	chr12	63557141	63615063	N
chr10	121823906	121871495	NovelTID_00000751	chr12	63557141	63615063	N
chr10	121823906	121871495	NovelTID_00000752	chr12	63557141	63615063	N
chr10	121823906	121871495	NovelTID_00000753	chr12	63557141	63615063	N
chr10	121823906	121871495	NovelTID_00000754	chr12	63557141	63615063	N
chr10	121823906	121871495	NovelTID_00000755	chr12	63557141	63615063	N
chr10	121823906	121871495	NovelTID_00000756	chr12	63557141	63615063	N
chr10	121823906	121871495	NovelTID_00000757	chr12	63557141	63615063	N
chr10	121823906	121871495	NovelTID_00000758	chr12	63557141	63615063	N
chr10	121823906	121871495	NovelTID_00000759	chr12	63557141	63615063	N
chr10	121823906	121871495	NovelTID_00000760	chr12	63557141	63615063	N
chr10	121823906	121871495	NovelTID_00000761	chr12	63557141	63615063	N
chr10	121823906	121871495	NovelTID_00000762	chr12	63557141	63615063	N
chr10	121823962	121880004	NovelTID_00000763	chr12	63551773	63615001	Y
chr10	121824998	121839736	NovelTID_00000764	chr12	63606139	63613745	N
chr10	121824998	121842505	NovelTID_00000765	chr12	63604208	63613745	N
chr10	121824998	121842505	NovelTID_00000766	chr12	63604208	63613745	N
chr10	121824998	121842505	NovelTID_00000767	chr12	63604208	63613745	N
chr10	121824998	121849095	NovelTID_00000768	chr12	63589235	63613745	N
chr10	121824998	121849095	NovelTID_00000769	chr12	63589235	63613745	N
chr10	121824998	121849095	NovelTID_00000770	chr12	63589235	63613745	N
chr10	121824998	121849095	NovelTID_00000771	chr12	63589235	63613745	N
chr10	121824998	121855905	NovelTID_00000772	chr12	63576988	63613745	N
chr10	121824998	121855905	NovelTID_00000773	chr12	63576988	63613745	N
chr10	121824998	121855905	NovelTID_00000774	chr12	63576988	63613745	N
chr10	121824998	121871495	NovelTID_00000775	chr12	63557141	63613745	N
chr10	121824998	121871495	NovelTID_00000776	chr12	63557141	63613745	N
chr10	121824998	121871495	NovelTID_00000777	chr12	63557141	63613745	N
chr10	121824998	121871495	NovelTID_00000778	chr12	63557141	63613745	N
chr10	121824998	121871495	NovelTID_00000779	chr12	63557141	63613745	N
chr10	121824998	121871495	NovelTID_00000780	chr12	63557141	63613745	N
chr10	121824998	121871495	NovelTID_00000781	chr12	63557141	63613745	N
chr10	121824998	121871495	NovelTID_00000782	chr12	63557141	63613745	N
chr10	121824998	121871495	NovelTID_00000783	chr12	63557141	63613745	N
chr10	121824998	121871495	NovelTID_00000784	chr12	63557141	63613745	N
chr10	121824998	121871495	NovelTID_00000785	chr12	63557141	63613745	N
chr10	121824998	121871495	NovelTID_00000786	chr12	63557141	63613745	N
chr10	121824998	121871495	NovelTID_00000787	chr12	63557141	63613745	N
chr10	121824998	121871495	NovelTID_00000788	chr12	63557141	63613745	N
chr10	121824998	121871495	NovelTID_00000789	chr12	63557141	63613745	N
chr10	121824998	121871495	NovelTID_00000790	chr12	63557141	63613745	N
chr10	121824998	121871495	NovelTID_00000791	chr12	63557141	63613745	N
chr10	121824998	121871495	NovelTID_00000792	chr12	63557141	63613745	N
chr10	121824998	121871495	NovelTID_00000793	chr12	63557141	63613745	N
chr10	121824998	121871495	NovelTID_00000794	chr12	63557141	63613745	N
chr10	121824998	121871495	NovelTID_00000795	chr12	63557141	63613745	N
chr10	121824998	121871495	NovelTID_00000796	chr12	63557141	63613745	N
chr10	121824998	121871495	NovelTID_00000797	chr12	63557141	63613745	N
chr10	121824998	121871495	NovelTID_00000798	chr12	63557141	63613745	N
chr10	121836924	121842505	NovelTID_00000799	chr12	63604208	63609897	N
chr10	121836924	121842505	NovelTID_00000800	chr12	63604208	63609897	N
chr10	121836924	121842505	NovelTID_00000801	chr12	63604208	63609897	N
chr10	121836924	121849095	NovelTID_00000802	chr12	63589235	63609897	N
chr10	121836924	121849095	NovelTID_00000803	chr12	63589235	63609897	N
chr10	121836924	121849095	NovelTID_00000804	chr12	63589235	63609897	N
chr10	121836924	121849095	NovelTID_00000805	chr12	63589235	63609897	N
chr10	121836924	121855905	NovelTID_00000806	chr12	63576988	63609897	N
chr10	121836924	121855905	NovelTID_00000807	chr12	63576988	63609897	N
chr10	121836924	121855905	NovelTID_00000808	chr12	63576988	63609897	N
chr10	121836924	121871495	NovelTID_00000809	chr12	63557141	63609897	N
chr10	121836924	121871495	NovelTID_00000810	chr12	63557141	63609897	N
chr10	121836924	121871495	NovelTID_00000811	chr12	63557141	63609897	N
chr10	121836924	121871495	NovelTID_00000812	chr12	63557141	63609897	N
chr10	121836924	121871495	NovelTID_00000813	chr12	63557141	63609897	N
chr10	121836924	121871495	NovelTID_00000814	chr12	63557141	63609897	N
chr10	121836924	121871495	NovelTID_00000815	chr12	63557141	63609897	N
chr10	121836924	121871495	NovelTID_00000816	chr12	63557141	63609897	N
chr10	121836924	121871495	NovelTID_00000817	chr12	63557141	63609897	N
chr10	121836924	121871495	NovelTID_00000818	chr12	63557141	63609897	N
chr10	121836924	121871495	NovelTID_00000819	chr12	63557141	63609897	N
chr10	121836924	121871495	NovelTID_00000820	chr12	63557141	63609897	N
chr10	121836924	121871495	NovelTID_00000821	chr12	63557141	63609897	N
chr10	121836924	121871495	NovelTID_00000822	chr12	63557141	63609897	N
chr10	121836924	121871495	NovelTID_00000823	chr12	63557141	63609897	N
chr10	121836924	121871495	NovelTID_00000824	chr12	63557141	63609897	N
chr10	121836924	121871495	NovelTID_00000825	chr12	63557141	63609897	N
chr10	121836924	121871495	NovelTID_00000826	chr12	63557141	63609897	N
chr10	121836924	121871495	NovelTID_00000827	chr12	63557141	63609897	N
chr10	121836924	121871495	NovelTID_00000828	chr12	63557141	63609897	N
chr10	121836924	121871495	NovelTID_00000829	chr12	63557141	63609897	N
chr10	121836924	121871495	NovelTID_00000830	chr12	63557141	63609897	N
chr10	121836924	121871495	NovelTID_00000831	chr12	63557141	63609897	N
chr10	121836924	121871495	NovelTID_00000832	chr12	63557141	63609897	N
chr10	121839756	121842505	NovelTID_00000833	chr12	63604208	63606127	N
chr10	121839756	121849095	NovelTID_00000834	chr12	63589235	63606127	N
chr10	121839756	121855905	NovelTID_00000835	chr12	63576988	63606127	N
chr10	121839756	121871495	NovelTID_00000836	chr12	63557141	63606127	N
chr10	121839756	121871495	NovelTID_00000837	chr12	63557141	63606127	N
chr10	121839756	121871495	NovelTID_00000838	chr12	63557141	63606127	N
chr10	121839756	121871495	NovelTID_00000839	chr12	63557141	63606127	N
chr10	121839756	121871495	NovelTID_00000840	chr12	63557141	63606127	N
chr10	121839756	121871495	NovelTID_00000841	chr12	63557141	63606127	N
chr10	121839756	121871495	NovelTID_00000842	chr12	63557141	63606127	N
chr10	121839756	121871495	NovelTID_00000843	chr12	63557141	63606127	N
chr10	121854145	121871495	NovelTID_00000844	chr12	63557141	63579768	N
chr10	121854145	121871495	NovelTID_00000845	chr12	63557141	63579768	N
chr10	121854145	121871495	NovelTID_00000846	chr12	63557141	63579768	N
chr10	121995497	121996962	KnowTID_00001092	chr12	63458246	63459588	N
chr10	122002078	122006947	KnowTID_00001093	chr12	63451868	63452768	N
chr10	122043671	122046539	NovelTID_00001070	chr12	63408498	63410735	N
chr10	122087392	122115714	NovelTID_00001071	chr12	63329050	63357687	N
chr10	122097776	122098650	KnowTID_00000844	chr12	63350624	63351419	N
chr10	124595951	124600979	NovelTID_00000850	chr12	60246290	60255264	N
chr10	124597391	124598287	NovelTID_00001072	chr12	60252552	60253498	N
chr10	124656355	124658839	KnowTID_00001095	chr12	60181033	60183767	N
chr10	124659069	124660854	KnowTID_00001096	chr12	60178244	60180657	N
chr10	124779009	124779235	KnowTID_00001097	chr12	60045677	60045918	N
chr10	124779452	124780891	NovelTID_00000851	chr12	60044209	60045461	N
chr10	124826342	124826543	KnowTID_00001098	chr12	59989793	59990012	Y
chr10	125531309	125566272	NovelTID_00000852	chr12	59120133	59155696	N
chr10	125531309	125566272	NovelTID_00000853	chr12	59120133	59155696	N
chr10	125556860	125575384	NovelTID_00001073	chr12	59110278	59129622	N
chr10	125692172	125694274	KnowTID_00000845	chr12	58986589	58990015	N
chr10	125809030	125812118	KnowTID_00000846	chr12	58901996	58905489	N
chr10	126115628	126116658	NovelTID_00001074	chr12	58592213	58593348	N
chr10	126225919	126230766	KnowTID_00001099	chr12	58481286	58485886	N
chr10	126395078	126398053	KnowTID_00000848	chr12	58260684	58262674	N
chr10	126408693	126409069	KnowTID_00001100	chr12	58247012	58247412	N
chr10	126412232	126414548	KnowTID_00001101	chr12	58242336	58244724	N
chr10	126507430	126511852	KnowTID_00000849	chr12	58136259	58138739	Y
chr10	126512319	126514557	KnowTID_00000850	chr12	58134109	58136021	Y
chr10	126586072	126588402	NovelTID_00001077	chr2	30382095	30382416	N
chr10	126600805	126602169	NovelTID_00001078	chr12	58026997	58028162	Y
chr10	127372356	127374333	NovelTID_00001079	chr12	57274456	57275224	N
chr10	127942512	127944952	KnowTID_00000855	chr12	56540640	56540910	N
chr10	128095794	128096907	KnowTID_00001102	chr12	56405270	56406053	N
chr10	128182019	128184051	NovelTID_00000856	chr12	56322995	56324886	N
chr10	128408252	128415166	KnowTID_00000857	chr12	56053301	56054199	N
chr10	128416863	128424272	NovelTID_00000857	chr12	56046727	56051817	N
chr11	3227122	3228084	KnowTID_00001217	chr22	31698705	31699690	N
chr11	3309385	3310422	NovelTID_00001081	chr22	31607012	31608033	N
chr11	3440798	3446476	NovelTID_00001082	chr22	31470917	31475253	N
chr11	4199531	4203682	NovelTID_00001084	chr22	30597804	30603006	N
chr11	4203065	4204666	NovelTID_00001085	chr22	30596706	30598328	N
chr11	4203065	4205213	NovelTID_00001086	chr22	30595645	30598328	N
chr11	4504691	4505274	NovelTID_00001087	chr22	30267410	30267795	N
chr11	4647229	4648419	NovelTID_00001088	chr22	30114704	30115920	N
chr11	5081764	5082289	NovelTID_00001231	chr22	29550409	29550885	N
chr11	5163314	5165425	NovelTID_00001089	chr22	29466268	29467498	N
chr11	5759696	5761222	KnowTID_00001104	chr7	44141469	44142881	N
chr11	5760866	5761222	KnowTID_00001105	chr7	44142485	44142881	N
chr11	6362192	6364825	KnowTID_00001223	chr2	190793644	190794161	N
chr11	6526173	6527499	KnowTID_00001106	chr7	45151431	45151715	N
chr11	7304886	7323488	NovelTID_00001092	chr7	46193729	46207646	N
chr11	7304886	7334955	NovelTID_00001093	chr7	46193729	46227761	N
chr11	8132494	8132870	NovelTID_00001094	chr7	47114653	47115039	N
chr11	8182547	8187328	NovelTID_00001234	chr7	47186552	47188724	N
chr11	8580768	8591806	NovelTID_00001095	chr7	47662684	47676428	Y
chr11	16416910	16417314	KnowTID_00001111	chr19	40738240	40738686	N
chr11	16416910	16417314	KnowTID_00001112	chr19	40738240	40738686	N
chr11	16507555	16509861	KnowTID_00001113	chr7	54910658	54911716	N
chr11	16650154	16651811	KnowTID_00001226	chr7	55085442	55086279	N
chr11	16855188	16858507	NovelTID_00001096	chr2	68686565	68690568	Y
chr11	16858791	16860040	KnowTID_00001114	chr2	68685599	68686224	N
chr11	17210558	17241499	NovelTID_00001097	chr2	68159106	68193955	N
chr11	17729367	17751330	NovelTID_00001235	chr2	67705207	67722522	N
chr11	18351592	18351997	KnowTID_00001115	chr2	67183186	67183947	N
chr11	18647288	18647737	NovelTID_00001098	chr2	66927844	66928360	N
chr11	18651329	18652625	KnowTID_00001227	chr2	66922650	66923948	Y
chr11	18698944	18700512	KnowTID_00001116	chr2	66896724	66897471	N
chr11	18740414	18743613	KnowTID_00001228	chr2	66860555	66865166	N
chr11	18926396	18927419	KnowTID_00001229	chr2	66653100	66654431	N
chr11	19241878	19246336	NovelTID_00001236	chr2	66302651	66306774	N
chr11	19408291	19411988	KnowTID_00001230	chr2	66107805	66110902	N
chr11	19408291	19411988	KnowTID_00001231	chr2	66107805	66110902	N
chr11	19432246	19434325	KnowTID_00001117	chr2	66088470	66090549	N
chr11	19452823	19454723	KnowTID_00001232	chr2	66062474	66063561	N
chr11	19512487	19516069	NovelTID_00001237	chr2	66007767	66011761	N
chr11	19819256	19820324	KnowTID_00001233	chr2	65663501	65664285	Y
chr11	19925704	19929647	NovelTID_00001238	chr2	65535284	65535741	N
chr11	20233035	20234750	NovelTID_00001100	chr2	65214315	65216106	N
chr11	20272952	20275453	NovelTID_00001101	chr2	65168222	65171030	N
chr11	20353084	20356026	NovelTID_00001105	chr2	65091815	65095670	N
chr11	20361261	20364667	KnowTID_00001236	chr2	65078006	65084747	N
chr11	20369548	20373990	NovelTID_00001106	chr2	65061794	65066188	N
chr11	20558624	20565058	NovelTID_00001243	chr2	64843785	64851754	N
chr11	20641786	20644967	KnowTID_00001118	chr2	64742709	64751267	Y
chr11	20838728	20851412	NovelTID_00001107	chr2	64511731	64516797	N
chr11	20882251	20882823	NovelTID_00001244	chr2	64487655	64488200	N
chr11	22500337	22510882	KnowTID_00001237	chr2	62693161	62696930	N
chr11	22904244	22905894	KnowTID_00001119	chr2	62094349	62094571	N
chr11	22967997	22975574	KnowTID_00001121	chr2	61986583	61990783	N
chr11	22968082	22973327	KnowTID_00001122	chr2	61989405	61990783	N
chr11	23204164	23205575	KnowTID_00001238	chr2	61699144	61701432	N
chr11	23205419	23206308	KnowTID_00001239	chr2	61698516	61699108	N
chr11	23696132	23702023	NovelTID_00001245	chr2	61085649	61086849	N
chr11	23705527	23719091	NovelTID_00001246	chr2	61068064	61081477	N
chr11	23707669	23720043	NovelTID_00001247	chr2	61067751	61078832	N
chr11	23936469	23937595	KnowTID_00001240	chr2	60831080	60833852	N
chr11	24079458	24080839	KnowTID_00001123	chr2	60671362	60672538	N
chr11	24155691	24157998	NovelTID_00001109	chr2	60578820	60580995	Y
chr11	24155691	24159515	NovelTID_00001110	chr2	60577024	60580995	Y
chr11	24155691	24174322	NovelTID_00001111	chr2	60556251	60580995	N
chr11	24155691	24174412	NovelTID_00001112	chr2	60556161	60580995	N
chr11	24164728	24174412	NovelTID_00001113	chr2	60556161	60567953	N
chr11	24678288	24679780	NovelTID_00001114	chr2	60060570	60062024	N
chr11	27079452	27081692	KnowTID_00001124	chr2	57783227	57784793	N
chr11	28635410	28638356	KnowTID_00001125	chr2	56232907	56236085	N
chr11	28750386	28751342	NovelTID_00001115	chr2	56154625	56155050	N
chr11	29549769	29550347	NovelTID_00001116	chr2	55329336	55329973	N
chr11	30168323	30169403	KnowTID_00001126	chr2	54682039	54683282	N
chr11	30371933	30373392	KnowTID_00001127	chr2	54556598	54557939	N
chr11	30671292	30671674	KnowTID_00001242	chr2	54198290	54198671	N
chr11	31309846	31313474	NovelTID_00001117	chr5	172798045	172799081	N
chr11	31535710	31537337	KnowTID_00001130	chr5	172997345	172998416	N
chr11	31611441	31613309	NovelTID_00001252	chr5	173096422	173097634	N
chr11	31648554	31650771	NovelTID_00001253	chr5	173148041	173158086	N
chr11	31770096	31770745	KnowTID_00001246	chr5	173314479	173315177	N
chr11	32002803	32004618	KnowTID_00001131	chr5	173587721	173588748	N
chr11	32002803	32004674	KnowTID_00001132	chr5	173587721	173588748	N
chr11	32033275	32036195	KnowTID_00001247	chr5	173631896	173632230	N
chr11	32122434	32123396	NovelTID_00001254	chr16	122780	124494	N
chr11	32193504	32196204	NovelTID_00001119	chr16	226816	227136	N
chr11	34026006	34037497	NovelTID_00001120	chr5	169625489	169638595	Y
chr11	34036047	34037497	NovelTID_00001121	chr5	169625489	169626868	Y
chr11	34038334	34039545	NovelTID_00001122	chr5	169623364	169624655	Y
chr11	34597507	34611107	NovelTID_00001123	chr5	169056522	169064161	N
chr11	34602304	34611162	NovelTID_00001124	chr5	169056522	169058033	N
chr11	34753992	34755166	NovelTID_00001255	chr5	168894435	168895917	N
chr11	35523063	35525532	KnowTID_00001133	chr5	168088738	168091821	Y
chr11	37078854	37085630	NovelTID_00001256	chr5	166364953	166369838	N
chr11	38072808	38076993	KnowTID_00001248	chr5	165373618	165374502	N
chr11	38163195	38165725	KnowTID_00001249	chr5	165271058	165274445	N
chr11	38675343	38705118	NovelTID_00001125	chr5	164661070	164685753	N
chr11	39121204	39203727	KnowTID_00001250	chr5	164148198	164247902	N
chr11	40329882	40336807	NovelTID_00001126	chr5	163066302	163072908	N
chr11	40385240	40397582	KnowTID_00001251	chr5	163012484	163025652	N
chr11	40557315	40558870	KnowTID_00001134	chr5	162875569	162876536	Y
chr11	41276780	41280047	KnowTID_00001135	chr5	162089252	162091474	N
chr11	41276780	41280047	KnowTID_00001136	chr5	162089252	162091474	N
chr11	42629168	42632682	KnowTID_00001137	chr5	160528354	160531503	N
chr11	43167124	43169367	KnowTID_00001138	chr5	159924721	159927331	N
chr11	43963501	44009754	NovelTID_00001257	chr5	158985247	159038446	N
chr11	44872421	44876353	KnowTID_00001252	chr5	158069321	158076011	N
chr11	45062934	45087182	NovelTID_00001258	chr5	157881040	157902905	N
chr11	45136365	45139566	KnowTID_00001139	chr5	157824024	157826551	N
chr11	45434112	45436009	NovelTID_00001260	chr5	157543848	157544889	N
chr11	45523570	45566437	NovelTID_00001261	chr5	157422087	157459661	N
chr11	45851719	45852625	NovelTID_00001262	chr5	157023553	157024262	N
chr11	46204022	46204880	NovelTID_00001128	chr5	156606659	156607185	N
chr11	46617533	46618451	NovelTID_00001263	chr5	156401124	156404007	N
chr11	47981436	47983907	KnowTID_00001140	chr5	154907034	154908405	N
chr11	48274079	48277755	KnowTID_00001254	chr5	154637952	154641107	N
chr11	48450457	48451074	NovelTID_00001264	chr5	154477431	154478242	N
chr11	48582847	48586694	NovelTID_00001265	chr5	154348576	154350283	N
chr11	48594331	48596286	KnowTID_00001255	chr5	154336768	154337112	Y
chr11	48608512	48612904	NovelTID_00001266	chr5	180672176	180681804	N
chr11	48669394	48671625	NovelTID_00001267	chr5	180615658	180616347	N
chr11	49081524	49082666	NovelTID_00001130	chr5	180211862	180212534	Y
chr11	49526271	49529334	NovelTID_00001131	chr5	179912540	179921337	Y
chr11	49526271	49532849	NovelTID_00001132	chr5	179911471	179921337	Y
chr11	49536389	49539789	KnowTID_00001141	chr5	179899528	179902770	N
chr11	50358941	50364092	NovelTID_00001133	chr5	178832365	178835258	N
chr11	50359310	50364092	NovelTID_00001134	chr5	178832365	178834827	N
chr11	51397428	51398153	KnowTID_00001257	chr5	177659779	177660765	Y
chr11	51452389	51453838	KnowTID_00001258	chr5	177551881	177552335	Y
chr11	51697595	51698424	KnowTID_00001143	chr5	133837024	133837377	N
chr11	51698751	51703211	NovelTID_00001135	chr5	133831263	133833935	N
chr11	51698751	51704845	NovelTID_00001136	chr5	133831185	133833935	N
chr11	51698751	51704845	NovelTID_00001137	chr5	133831185	133833935	N
chr11	51698751	51704845	NovelTID_00001138	chr5	133831185	133833935	N
chr11	51698751	51704845	NovelTID_00001139	chr5	133831185	133833935	N
chr11	51700900	51703211	NovelTID_00001140	chr5	133831263	133832156	N
chr11	51700900	51704845	NovelTID_00001141	chr5	133831185	133832156	N
chr11	51700900	51704845	NovelTID_00001142	chr5	133831185	133832156	N
chr11	51700900	51704845	NovelTID_00001143	chr5	133831185	133832156	N
chr11	51700900	51704845	NovelTID_00001144	chr5	133831185	133832156	N
chr11	51758145	51761906	NovelTID_00001270	chr5	133769278	133773106	N
chr11	51758292	51761361	NovelTID_00001271	chr5	133769600	133773106	N
chr11	51758292	51761906	NovelTID_00001272	chr5	133769278	133773106	N
chr11	51760150	51761943	NovelTID_00001146	chr5	133769278	133771087	N
chr11	51910813	51912091	KnowTID_00001259	chr5	133562063	133563498	Y
chr11	52123447	52126897	NovelTID_00001273	chr5	133423971	133426142	N
chr11	52159291	52160489	NovelTID_00001147	chr5	133360698	133362742	N
chr11	52171438	52172130	NovelTID_00001274	chr5	133343389	133344118	N
chr11	53295912	53300848	KnowTID_00001261	chr5	132145641	132146599	N
chr11	53524855	53529279	NovelTID_00001275	chr5	131882311	131886486	N
chr11	54110373	54112034	KnowTID_00001265	chr5	131351848	131352413	N
chr11	54616412	54628277	KnowTID_00001145	chr5	130577692	130587853	N
chr11	55162031	55163839	NovelTID_00001276	chr5	150985677	150986749	N
chr11	55162031	55163839	NovelTID_00001277	chr5	150985677	150986749	N
chr11	55181872	55182724	NovelTID_00001278	chr5	151002827	151004173	N
chr11	55318490	55320723	KnowTID_00001266	chr5	151191061	151193607	N
chr11	56346533	56369982	NovelTID_00001279	chr5	152354366	152371283	N
chr11	57245199	57246353	KnowTID_00001146	chr5	153298279	153299280	N
chr11	57267064	57281136	NovelTID_00001280	chr5	153326608	153344372	N
chr11	57353397	57359370	NovelTID_00001149	chr5	153444590	153448187	N
chr11	57401148	57403590	KnowTID_00001267	chr5	153490130	153492730	N
chr11	57415078	57416174	KnowTID_00001268	chr5	153519304	153519736	N
chr11	57786944	57790985	NovelTID_00001150	chr5	154092660	154096338	Y
chr11	57819113	57822208	KnowTID_00001269	chr5	154131674	154134565	N
chr11	57906070	57908220	NovelTID_00001151	chr5	154229361	154230568	N
chr11	57906070	57908220	NovelTID_00001152	chr5	154229361	154230568	N
chr11	57906070	57908220	NovelTID_00001153	chr5	154229361	154230568	N
chr11	57906691	57908220	NovelTID_00001154	chr5	154230227	154230568	N
chr11	57906691	57908220	NovelTID_00001155	chr5	154230227	154230568	N
chr11	57916239	57917391	NovelTID_00001156	chr5	154235706	154237906	Y
chr11	59042011	59043275	NovelTID_00001158	chr1	228269094	228270145	N
chr11	59448994	59451238	KnowTID_00001147	chr17	16923599	16926332	N
chr11	59902534	59913650	NovelTID_00001282	chr17	17566662	17579197	N
chr11	61016096	61017597	KnowTID_00001151	chr17	19656431	19656995	N
chr11	61312142	61315379	KnowTID_00001272	chr17	19273768	19274679	N
chr11	62481460	62483286	NovelTID_00001160	chr17	16418930	16420301	N
chr11	62749263	62752292	NovelTID_00001161	chr17	15386323	15387193	N
chr11	63259896	63262111	KnowTID_00001274	chr17	14767084	14767927	N
chr11	63426083	63428236	NovelTID_00001284	chr17	14589803	14591178	N
chr11	63428967	63437095	NovelTID_00001285	chr17	14582376	14589022	N
chr11	64575661	64576498	NovelTID_00001287	chr17	13157114	13157436	N
chr11	64578225	64581187	NovelTID_00001164	chr17	13154478	13155585	N
chr11	64586591	64588204	KnowTID_00001276	chr17	13145666	13146635	N
chr11	64745138	64748407	KnowTID_00001155	chr17	12975132	12975868	N
chr11	64984189	64987147	NovelTID_00001288	chr17	12672226	12686863	N
chr11	65086580	65088354	NovelTID_00001165	chr17	12563094	12565016	N
chr11	65455758	65463340	NovelTID_00001290	chr17	12131382	12136454	N
chr11	65455758	65463340	NovelTID_00001291	chr17	12131382	12136454	N
chr11	66692285	66694266	KnowTID_00001277	chr17	10773639	10774554	N
chr11	66815587	66825127	KnowTID_00001156	chr17	10646871	10654958	N
chr11	67584813	67586415	NovelTID_00001166	chr17	9727473	9729036	Y
chr11	67602516	67606597	KnowTID_00001157	chr17	9700036	9706014	Y
chr11	67735877	67737310	KnowTID_00001158	chr17	9546965	9548610	Y
chr11	68020852	68021232	NovelTID_00001167	chr17	9149306	9150029	N
chr11	68437129	68438082	NovelTID_00001168	chr17	8599911	8600938	N
chr11	68471509	68494535	NovelTID_00001169	chr17	8547645	8566520	N
chr11	68473457	68474956	NovelTID_00001170	chr17	8562704	8564773	N
chr11	68490924	68492483	KnowTID_00001278	chr17	8547645	8549085	N
chr11	69194354	69196984	NovelTID_00001294	chr17	7771034	7772774	Y
chr11	70286954	70290996	NovelTID_00001295	chr17	4654503	4656341	N
chr11	72032207	72034623	NovelTID_00001296	chr17	6564757	6565199	N
chr11	72500085	72501596	KnowTID_00001282	chr17	4171265	4172451	N
chr11	72765116	72770614	NovelTID_00001171	chr17	3877517	3882779	N
chr11	74569358	74571129	KnowTID_00001283	chr17	2448206	2449334	N
chr11	75108202	75111159	NovelTID_00001298	chr17	1803306	1808221	N
chr11	75542836	75546272	NovelTID_00001172	chr17	1303652	1307862	N
chr11	76479745	76481312	NovelTID_00001174	chr17	1171447	1171772	N
[truncated: 9,480 more rows]
