# Supplementary material for: Comprehensive Characterization of 10,571 Mouse Large Intergenic Noncoding RNAs from Whole Transcriptome Sequencing
Source: PLoS One. 2013 Aug 12;8(8):e70835. doi: 10.1371/journal.pone.0070835 (PMC3741367; doi:10.1371/journal.pone.0070835)
Supplement: Dataset S6 — The list of GO terms according to the number of lincRNAs. (XLS) [file pone.0070835.s014.xls]

ID	Num of gene have the function	type	function
GO:0009987	708	BP	cellular process
GO:0071841	523	BP	cellular component organization or biogenesis at cellular level
GO:0051179	477	BP	localization
GO:0006810	463	BP	transport
GO:0046483	463	BP	heterocycle metabolic process
GO:0010817	463	BP	regulation of hormone levels
GO:0065008	463	BP	regulation of biological quality
GO:0051234	463	BP	establishment of localization
GO:0016043	451	BP	cellular component organization
GO:0071842	446	BP	cellular component organization at cellular level
GO:0071840	439	BP	cellular component organization or biogenesis
GO:0050794	439	BP	regulation of cellular process
GO:0009143	434	BP	nucleoside triphosphate catabolic process
GO:0009146	434	BP	purine nucleoside triphosphate catabolic process
GO:0044237	421	BP	cellular metabolic process
GO:0008152	413	BP	metabolic process
GO:0044238	413	BP	primary metabolic process
GO:0035556	403	BP	intracellular signal transduction
GO:0044249	394	BP	cellular biosynthetic process
GO:0009058	394	BP	biosynthetic process
GO:0009203	373	BP	ribonucleoside triphosphate catabolic process
GO:0009261	373	BP	ribonucleotide catabolic process
GO:0009154	373	BP	purine ribonucleotide catabolic process
GO:0009207	373	BP	purine ribonucleoside triphosphate catabolic process
GO:0006796	371	BP	phosphate-containing compound metabolic process
GO:0006793	371	BP	phosphorus metabolic process
GO:0048522	371	BP	positive regulation of cellular process
GO:0065009	371	BP	regulation of molecular function
GO:0071804	367	BP	cellular potassium ion transport
GO:0044057	367	BP	regulation of system process
GO:0071805	367	BP	potassium ion transmembrane transport
GO:0006813	367	BP	potassium ion transport
GO:0048518	362	BP	positive regulation of biological process
GO:0065007	362	BP	biological regulation
GO:0050789	362	BP	regulation of biological process
GO:0043933	357	BP	macromolecular complex subunit organization
GO:0007018	357	BP	microtubule-based movement
KEGG:04114	357	ke	Oocyte meiosis
GO:0009966	332	BP	regulation of signal transduction
GO:0044248	321	BP	cellular catabolic process
GO:0048583	319	BP	regulation of response to stimulus
GO:0008104	318	BP	protein localization
GO:0009653	310	BP	anatomical structure morphogenesis
GO:0007154	310	BP	cell communication
GO:0000902	310	BP	cell morphogenesis
GO:0022610	310	BP	biological adhesion
GO:0007155	310	BP	cell adhesion
GO:0006928	310	BP	cellular component movement
GO:0040011	310	BP	locomotion
GO:0023051	310	BP	regulation of signaling
GO:0023052	310	BP	signaling
GO:0048858	308	BP	cell projection morphogenesis
GO:0032990	308	BP	cell part morphogenesis
KEGG:04360	308	ke	Axon guidance
GO:0030030	308	BP	cell projection organization
GO:0031175	308	BP	neuron projection development
GO:0007411	305	BP	axon guidance
GO:0006184	305	BP	GTP catabolic process
GO:1901068	305	BP	guanosine-containing compound metabolic process
GO:1901069	305	BP	guanosine-containing compound catabolic process
GO:0048812	305	BP	neuron projection morphogenesis
GO:0051641	305	BP	cellular localization
GO:0010959	305	BP	regulation of metal ion transport
GO:0007264	305	BP	small GTPase mediated signal transduction
GO:0006152	305	BP	purine nucleoside catabolic process
GO:0048667	305	BP	cell morphogenesis involved in neuron differentiation
GO:0051924	305	BP	regulation of calcium ion transport
GO:0009164	305	BP	nucleoside catabolic process
GO:0046039	305	BP	GTP metabolic process
KEGG:04010	305	ke	MAPK signaling pathway
GO:0046128	305	BP	purine ribonucleoside metabolic process
GO:0046130	305	BP	purine ribonucleoside catabolic process
GO:0009119	305	BP	ribonucleoside metabolic process
GO:0042278	305	BP	purine nucleoside metabolic process
GO:0051649	305	BP	establishment of localization in cell
GO:0042454	305	BP	ribonucleoside catabolic process
GO:0007275	304	BP	multicellular organismal development
GO:0048731	304	BP	system development
GO:0048869	301	BP	cellular developmental process
GO:0007165	301	BP	signal transduction
GO:0030154	301	BP	cell differentiation
GO:0045595	301	BP	regulation of cell differentiation
GO:0010646	301	BP	regulation of cell communication
GO:0051128	301	BP	regulation of cellular component organization
GO:0032879	301	BP	regulation of localization
GO:0032502	301	BP	developmental process
GO:2000026	301	BP	regulation of multicellular organismal development
GO:0016337	301	BP	cell-cell adhesion
GO:0051239	301	BP	regulation of multicellular organismal process
GO:0032989	301	BP	cellular component morphogenesis
GO:0048856	301	BP	anatomical structure development
KEGG:04080	300	ke	Neuroactive ligand-receptor interaction
GO:0070271	300	BP	protein complex biogenesis
GO:0006461	300	BP	protein complex assembly
KEGG:04724	300	ke	Glutamatergic synapse
GO:0022607	300	BP	cellular component assembly
GO:0065003	300	BP	macromolecular complex assembly
GO:0071822	300	BP	protein complex subunit organization
GO:0022008	299	BP	neurogenesis
GO:0048468	299	BP	cell development
GO:0048666	299	BP	neuron development
GO:0021954	299	BP	central nervous system neuron development
GO:0048699	299	BP	generation of neurons
GO:0021955	299	BP	central nervous system neuron axonogenesis
GO:0007399	299	BP	nervous system development
GO:0007409	299	BP	axonogenesis
GO:0030182	299	BP	neuron differentiation
KEGG:04930	296	ke	Type II diabetes mellitus
KEGG:04730	296	ke	Long-term depression
GO:0002790	296	BP	peptide secretion
GO:0030072	296	BP	peptide hormone secretion
GO:0032412	296	BP	regulation of ion transmembrane transporter activity
GO:0030001	296	BP	metal ion transport
GO:0015807	296	BP	L-amino acid transport
GO:0017157	296	BP	regulation of exocytosis
GO:0030705	296	BP	cytoskeleton-dependent intracellular transport
GO:0021953	296	BP	central nervous system neuron differentiation
GO:0046058	296	BP	cAMP metabolic process
GO:0031345	296	BP	negative regulation of cell projection organization
GO:0030817	296	BP	regulation of cAMP biosynthetic process
GO:0032409	296	BP	regulation of transporter activity
GO:0048878	296	BP	chemical homeostasis
GO:0060284	296	BP	regulation of cell development
GO:0010977	296	BP	negative regulation of neuron projection development
KEGG:04726	296	ke	Serotonergic synapse
GO:0070838	296	BP	divalent metal ion transport
KEGG:04070	296	ke	Phosphatidylinositol signaling system
GO:2000310	296	BP	regulation of N-methyl-D-aspartate selective glutamate receptor activity
KEGG:04020	296	ke	Calcium signaling pathway
GO:0051046	296	BP	regulation of secretion
KEGG:05214	296	ke	Glioma
GO:0031644	296	BP	regulation of neurological system process
GO:0051402	296	BP	neuron apoptotic process
GO:0051963	296	BP	regulation of synapse assembly
GO:0035637	296	BP	multicellular organismal signaling
GO:0045956	296	BP	positive regulation of calcium ion-dependent exocytosis
GO:0003001	296	BP	generation of a signal involved in cell-cell signaling
GO:0007218	296	BP	neuropeptide signaling pathway
GO:2000300	296	BP	regulation of synaptic vesicle exocytosis
GO:0050803	296	BP	regulation of synapse structure and activity
GO:0034765	296	BP	regulation of ion transmembrane transport
GO:0044089	296	BP	positive regulation of cellular component biogenesis
GO:0006836	296	BP	neurotransmitter transport
GO:0009914	296	BP	hormone transport
GO:0030815	296	BP	negative regulation of cAMP metabolic process
GO:0070997	296	BP	neuron death
GO:0060997	296	BP	dendritic spine morphogenesis
GO:0007215	296	BP	glutamate receptor signaling pathway
GO:0007610	296	BP	behavior
KEGG:04012	296	ke	ErbB signaling pathway
GO:0046903	296	BP	secretion
GO:0045921	296	BP	positive regulation of exocytosis
GO:0009205	296	BP	purine ribonucleoside triphosphate metabolic process
GO:0022029	296	BP	telencephalon cell migration
GO:0051047	296	BP	positive regulation of secretion
KEGG:04728	296	ke	Dopaminergic synapse
GO:0035249	296	BP	synaptic transmission, glutamatergic
GO:0019226	296	BP	transmission of nerve impulse
GO:0060078	296	BP	regulation of postsynaptic membrane potential
GO:0050770	296	BP	regulation of axonogenesis
GO:0006873	296	BP	cellular ion homeostasis
GO:1900543	296	BP	negative regulation of purine nucleotide metabolic process
KEGG:04540	296	ke	Gap junction
GO:0050905	296	BP	neuromuscular process
GO:0009117	296	BP	nucleotide metabolic process
GO:0021761	296	BP	limbic system development
GO:0015812	296	BP	gamma-aminobutyric acid transport
GO:0019725	296	BP	cellular homeostasis
GO:0015844	296	BP	monoamine transport
KEGG:04720	296	ke	Long-term potentiation
KEGG:04966	296	ke	Collecting duct acid secretion
KEGG:05031	296	ke	Amphetamine addiction
GO:1900371	296	BP	regulation of purine nucleotide biosynthetic process
GO:0035640	296	BP	exploration behavior
KEGG:05033	296	ke	Nicotine addiction
GO:0030803	296	BP	negative regulation of cyclic nucleotide biosynthetic process
GO:0006812	296	BP	cation transport
GO:2000311	296	BP	regulation of alpha-amino-3-hydroxy-5-methyl-4-isoxazole propionate selective glutamate receptor activity
GO:0032230	296	BP	positive regulation of synaptic transmission, GABAergic
GO:0030800	296	BP	negative regulation of cyclic nucleotide metabolic process
GO:0031646	296	BP	positive regulation of neurological system process
GO:0008306	296	BP	associative learning
GO:0022604	296	BP	regulation of cell morphogenesis
GO:0046700	296	BP	heterocycle catabolic process
GO:0021766	296	BP	hippocampus development
GO:0045980	296	BP	negative regulation of nucleotide metabolic process
GO:0043523	296	BP	regulation of neuron apoptotic process
GO:0051953	296	BP	negative regulation of amine transport
GO:0051051	296	BP	negative regulation of transport
GO:0042063	296	BP	gliogenesis
GO:0007267	296	BP	cell-cell signaling
GO:0010975	296	BP	regulation of neuron projection development
GO:0097061	296	BP	dendritic spine organization
GO:0034220	296	BP	ion transmembrane transport
GO:0007158	296	BP	neuron cell-cell adhesion
GO:0009187	296	BP	cyclic nucleotide metabolic process
GO:0007631	296	BP	feeding behavior
GO:0051588	296	BP	regulation of neurotransmitter transport
GO:0045838	296	BP	positive regulation of membrane potential
GO:0070588	296	BP	calcium ion transmembrane transport
GO:0051960	296	BP	regulation of nervous system development
GO:0050808	296	BP	synapse organization
GO:0010769	296	BP	regulation of cell morphogenesis involved in differentiation
KEGG:05030	296	ke	Cocaine addiction
GO:0051925	296	BP	regulation of calcium ion transport via voltage-gated calcium channel activity
GO:0048172	296	BP	regulation of short-term neuronal synaptic plasticity
GO:0019933	296	BP	cAMP-mediated signaling
GO:0001764	296	BP	neuron migration
GO:0030802	296	BP	regulation of cyclic nucleotide biosynthetic process
GO:0046928	296	BP	regulation of neurotransmitter secretion
GO:0051969	296	BP	regulation of transmission of nerve impulse
KEGG:04971	296	ke	Gastric acid secretion
GO:0045664	296	BP	regulation of neuron differentiation
GO:0061001	296	BP	regulation of dendritic spine morphogenesis
GO:0007214	296	BP	gamma-aminobutyric acid signaling pathway
GO:0000904	296	BP	cell morphogenesis involved in differentiation
GO:0035176	296	BP	social behavior
GO:0007187	296	BP	G-protein coupled receptor signaling pathway, coupled to cyclic nucleotide second messenger
GO:0007269	296	BP	neurotransmitter secretion
GO:0007270	296	BP	neuron-neuron synaptic transmission
GO:0050877	296	BP	neurological system process
GO:0007210	296	BP	serotonin receptor signaling pathway
GO:0015837	296	BP	amine transport
GO:0006814	296	BP	sodium ion transport
GO:0007417	296	BP	central nervous system development
GO:0042220	296	BP	response to cocaine
GO:0060341	296	BP	regulation of cellular localization
GO:0051259	296	BP	protein oligomerization
GO:0045761	296	BP	regulation of adenylate cyclase activity
GO:0030900	296	BP	forebrain development
GO:0050885	296	BP	neuromuscular process controlling balance
GO:0008542	296	BP	visual learning
GO:0016192	296	BP	vesicle-mediated transport
GO:0051932	296	BP	synaptic transmission, GABAergic
GO:0006887	296	BP	exocytosis
GO:0009123	296	BP	nucleoside monophosphate metabolic process
GO:0050806	296	BP	positive regulation of synaptic transmission
GO:0051966	296	BP	regulation of synaptic transmission, glutamatergic
GO:2000463	296	BP	positive regulation of excitatory postsynaptic membrane potential
GO:0050805	296	BP	negative regulation of synaptic transmission
GO:0050801	296	BP	ion homeostasis
GO:0051962	296	BP	positive regulation of nervous system development
GO:0022898	296	BP	regulation of transmembrane transporter activity
GO:0048708	296	BP	astrocyte differentiation
GO:0042596	296	BP	fear response
GO:0031344	296	BP	regulation of cell projection organization
GO:0019233	296	BP	sensory perception of pain
GO:0048013	296	BP	ephrin receptor signaling pathway
GO:0055086	296	BP	nucleobase-containing small molecule metabolic process
GO:0019935	296	BP	cyclic-nucleotide-mediated signaling
GO:0003008	296	BP	system process
GO:0021819	296	BP	layer formation in cerebral cortex
GO:0030818	296	BP	negative regulation of cAMP biosynthetic process
GO:0051971	296	BP	positive regulation of transmission of nerve impulse
GO:0021700	296	BP	developmental maturation
GO:0055065	296	BP	metal ion homeostasis
GO:0031279	296	BP	regulation of cyclase activity
GO:0048169	296	BP	regulation of long-term neuronal synaptic plasticity
GO:0048814	296	BP	regulation of dendrite morphogenesis
GO:0050804	296	BP	regulation of synaptic transmission
GO:0007416	296	BP	synapse assembly
GO:0016079	296	BP	synaptic vesicle exocytosis
GO:0035235	296	BP	ionotropic glutamate receptor signaling pathway
GO:0006163	296	BP	purine nucleotide metabolic process
GO:0060996	296	BP	dendritic spine development
KEGG:04970	296	ke	Salivary secretion
GO:0007268	296	BP	synaptic transmission
KEGG:04514	296	ke	Cell adhesion molecules (CAMs)
GO:0001505	296	BP	regulation of neurotransmitter levels
GO:0007628	296	BP	adult walking behavior
GO:0030808	296	BP	regulation of nucleotide biosynthetic process
GO:0021543	296	BP	pallium development
GO:0014073	296	BP	response to tropane
GO:0017156	296	BP	calcium ion-dependent exocytosis
GO:0007616	296	BP	long-term memory
GO:0007611	296	BP	learning or memory
GO:0010001	296	BP	glial cell differentiation
GO:0051938	296	BP	L-glutamate import
GO:0043092	296	BP	L-amino acid import
GO:0060627	296	BP	regulation of vesicle-mediated transport
GO:0009116	296	BP	nucleoside metabolic process
GO:0021987	296	BP	cerebral cortex development
KEGG:04725	296	ke	Cholinergic synapse
GO:0031346	296	BP	positive regulation of cell projection organization
GO:0043269	296	BP	regulation of ion transport
GO:0048168	296	BP	regulation of neuronal synaptic plasticity
GO:0060291	296	BP	long-term synaptic potentiation
GO:0034762	296	BP	regulation of transmembrane transport
GO:0050768	296	BP	negative regulation of neurogenesis
GO:0016082	296	BP	synaptic vesicle priming
GO:0006140	296	BP	regulation of nucleotide metabolic process
GO:0030073	296	BP	insulin secretion
GO:0043279	296	BP	response to alkaloid
GO:0072523	296	BP	purine-containing compound catabolic process
GO:0008038	296	BP	neuron recognition
GO:0001662	296	BP	behavioral fear response
GO:0006865	296	BP	amino acid transport
KEGG:05032	296	ke	Morphine addiction
GO:0021801	296	BP	cerebral cortex radial glia guided migration
GO:0023061	296	BP	signal release
GO:0030799	296	BP	regulation of cyclic nucleotide metabolic process
GO:0031645	296	BP	negative regulation of neurological system process
KEGG:05034	296	ke	Alcoholism
GO:0015672	296	BP	monovalent inorganic cation transport
GO:0072503	296	BP	cellular divalent inorganic cation homeostasis
GO:0030814	296	BP	regulation of cAMP metabolic process
GO:0001508	296	BP	regulation of action potential
GO:0007632	296	BP	visual behavior
GO:0051048	296	BP	negative regulation of secretion
GO:0051705	296	BP	behavioral interaction between organisms
GO:0007613	296	BP	memory
GO:0015833	296	BP	peptide transport
GO:0055082	296	BP	cellular chemical homeostasis
GO:0021895	296	BP	cerebral cortex neuron differentiation
GO:0006816	296	BP	calcium ion transport
GO:0002209	296	BP	behavioral defense response
GO:0009144	296	BP	purine nucleoside triphosphate metabolic process
GO:1900542	296	BP	regulation of purine nucleotide metabolic process
GO:0006820	296	BP	anion transport
GO:0048488	296	BP	synaptic vesicle endocytosis
GO:0050773	296	BP	regulation of dendrite development
GO:0017158	296	BP	regulation of calcium ion-dependent exocytosis
GO:0032228	296	BP	regulation of synaptic transmission, GABAergic
GO:0010469	296	BP	regulation of receptor activity
KEGG:04723	296	ke	Retrograde endocannabinoid signaling
GO:0019228	296	BP	regulation of action potential in neuron
GO:0019932	296	BP	second-messenger-mediated signaling
GO:0006874	296	BP	cellular calcium ion homeostasis
GO:0051339	296	BP	regulation of lyase activity
GO:0043113	296	BP	receptor clustering
GO:0007612	296	BP	learning
GO:0033555	296	BP	multicellular organismal response to stress
GO:0051968	296	BP	positive regulation of synaptic transmission, glutamatergic
GO:0001964	296	BP	startle response
GO:0034655	296	BP	nucleobase-containing compound catabolic process
GO:0030534	296	BP	adult behavior
GO:0009199	296	BP	ribonucleoside triphosphate metabolic process
GO:0008088	296	BP	axon cargo transport
GO:0051970	296	BP	negative regulation of transmission of nerve impulse
GO:1900449	296	BP	regulation of glutamate receptor signaling pathway
GO:0032940	296	BP	secretion by cell
GO:0006171	296	BP	cAMP biosynthetic process
GO:0016358	296	BP	dendrite development
GO:0072511	296	BP	divalent inorganic cation transport
KEGG:04727	296	ke	GABAergic synapse
GO:0042592	296	BP	homeostatic process
GO:0009190	296	BP	cyclic nucleotide biosynthetic process
GO:0009124	296	BP	nucleoside monophosphate biosynthetic process
GO:0051049	296	BP	regulation of transport
GO:0060081	296	BP	membrane hyperpolarization
GO:0007626	296	BP	locomotory behavior
GO:0050767	296	BP	regulation of neurogenesis
GO:0007420	296	BP	brain development
GO:0051965	296	BP	positive regulation of synapse assembly
GO:0050807	296	BP	regulation of synapse organization
GO:0007193	296	BP	adenylate cyclase-inhibiting G-protein coupled receptor signaling pathway
GO:0021537	296	BP	telencephalon development
GO:0048709	296	BP	oligodendrocyte differentiation
GO:0006195	296	BP	purine nucleotide catabolic process
GO:0021885	296	BP	forebrain cell migration
GO:0048489	296	BP	synaptic vesicle transport
GO:0021892	296	BP	cerebral cortex GABAergic interneuron differentiation
GO:0009166	296	BP	nucleotide catabolic process
GO:0072521	296	BP	purine-containing compound metabolic process
GO:0032501	296	BP	multicellular organismal process
GO:0007188	296	BP	adenylate cyclase-modulating G-protein coupled receptor signaling pathway
GO:0014051	296	BP	gamma-aminobutyric acid secretion
GO:0051899	296	BP	membrane depolarization
GO:0014047	296	BP	glutamate secretion
KEGG:05014	296	ke	Amyotrophic lateral sclerosis (ALS)
GO:0035641	296	BP	locomotory exploration behavior
KEGG:04961	296	ke	Endocrine and other factor-regulated calcium reabsorption
GO:0048167	296	BP	regulation of synaptic plasticity
GO:0055085	296	BP	transmembrane transport
GO:0010976	296	BP	positive regulation of neuron projection development
GO:0006811	296	BP	ion transport
KEGG:04721	296	ke	Synaptic vesicle cycle
GO:0046879	296	BP	hormone secretion
GO:0051130	296	BP	positive regulation of cellular component organization
GO:0010970	296	BP	microtubule-based transport
GO:0006753	296	BP	nucleoside phosphate metabolic process
GO:0060998	296	BP	regulation of dendritic spine development
GO:0055074	296	BP	calcium ion homeostasis
GO:0060079	296	BP	regulation of excitatory postsynaptic membrane potential
GO:0042391	296	BP	regulation of membrane potential
GO:0051050	296	BP	positive regulation of transport
GO:0048813	296	BP	dendrite morphogenesis
GO:0072507	296	BP	divalent inorganic cation homeostasis
GO:0021799	296	BP	cerebral cortex radially oriented cell migration
GO:0035418	296	BP	protein localization to synapse
GO:0008344	296	BP	adult locomotory behavior
GO:0051952	296	BP	regulation of amine transport
GO:0050890	296	BP	cognition
GO:1901214	296	BP	regulation of neuron death
GO:0021952	296	BP	central nervous system projection neuron axonogenesis
GO:0051937	296	BP	catecholamine transport
GO:0071705	296	BP	nitrogen compound transport
GO:0080090	254	BP	regulation of primary metabolic process
KEGG:01100	254	ke	Metabolic pathways
GO:0006732	254	BP	coenzyme metabolic process
GO:0031323	254	BP	regulation of cellular metabolic process
KEGG:00640	254	ke	Propanoate metabolism
GO:0019222	254	BP	regulation of metabolic process
GO:0060255	253	BP	regulation of macromolecule metabolic process
GO:0002253	244	BP	activation of immune response
GO:0072524	238	BP	pyridine-containing compound metabolic process
GO:0006006	238	BP	glucose metabolic process
GO:0019318	238	BP	hexose metabolic process
GO:0043648	238	BP	dicarboxylic acid metabolic process
GO:0005996	238	BP	monosaccharide metabolic process
KEGG:00010	238	ke	Glycolysis / Gluconeogenesis
GO:0019362	238	BP	pyridine nucleotide metabolic process
KEGG:00620	238	ke	Pyruvate metabolism
GO:0046649	236	BP	lymphocyte activation
GO:0006139	234	BP	nucleobase-containing compound metabolic process
GO:0009889	234	BP	regulation of biosynthetic process
GO:0044260	234	BP	cellular macromolecule metabolic process
GO:0010467	234	BP	gene expression
GO:0090304	234	BP	nucleic acid metabolic process
GO:2000112	234	BP	regulation of cellular macromolecule biosynthetic process
GO:0034645	234	BP	cellular macromolecule biosynthetic process
GO:0043170	234	BP	macromolecule metabolic process
GO:0031326	234	BP	regulation of cellular biosynthetic process
GO:0034641	234	BP	cellular nitrogen compound metabolic process
GO:0009059	234	BP	macromolecule biosynthetic process
GO:0006807	234	BP	nitrogen compound metabolic process
GO:0019219	231	BP	regulation of nucleobase-containing compound metabolic process
GO:0051252	231	BP	regulation of RNA metabolic process
GO:2001141	231	BP	regulation of RNA biosynthetic process
GO:0006355	231	BP	regulation of transcription, DNA-dependent
GO:0032774	231	BP	RNA biosynthetic process
GO:0016070	231	BP	RNA metabolic process
GO:0016568	231	BP	chromatin modification
GO:0006351	231	BP	transcription, DNA-dependent
GO:0051171	231	BP	regulation of nitrogen compound metabolic process
GO:0010468	231	BP	regulation of gene expression
GO:0006325	231	BP	chromatin organization
GO:0051276	231	BP	chromosome organization
GO:0010556	231	BP	regulation of macromolecule biosynthetic process
GO:0006974	227	BP	response to DNA damage stimulus
GO:0006996	227	BP	organelle organization
GO:0007049	227	BP	cell cycle
GO:0042110	227	BP	T cell activation
GO:0006259	227	BP	DNA metabolic process
GO:0030098	227	BP	lymphocyte differentiation
GO:0006281	227	BP	DNA repair
GO:0002521	227	BP	leukocyte differentiation
GO:0043436	183	BP	oxoacid metabolic process
GO:0006629	183	BP	lipid metabolic process
GO:0055114	183	BP	oxidation-reduction process
KEGG:00071	183	ke	Fatty acid metabolism
GO:0019752	183	BP	carboxylic acid metabolic process
GO:0051186	183	BP	cofactor metabolic process
KEGG:04146	183	ke	Peroxisome
GO:0019395	183	BP	fatty acid oxidation
GO:0009056	183	BP	catabolic process
GO:0072329	183	BP	monocarboxylic acid catabolic process
GO:0044255	183	BP	cellular lipid metabolic process
KEGG:00650	183	ke	Butanoate metabolism
GO:0042180	183	BP	cellular ketone metabolic process
GO:0030258	183	BP	lipid modification
GO:0046395	183	BP	carboxylic acid catabolic process
GO:0016054	183	BP	organic acid catabolic process
GO:0044242	183	BP	cellular lipid catabolic process
KEGG:00630	183	ke	Glyoxylate and dicarboxylate metabolism
GO:0044282	183	BP	small molecule catabolic process
GO:0006631	183	BP	fatty acid metabolic process
GO:0032787	183	BP	monocarboxylic acid metabolic process
GO:0044281	183	BP	small molecule metabolic process
GO:0016042	183	BP	lipid catabolic process
GO:0006082	183	BP	organic acid metabolic process
GO:0034440	183	BP	lipid oxidation
GO:0006464	174	BP	cellular protein modification process
GO:0043412	174	BP	macromolecule modification
GO:0044267	174	BP	cellular protein metabolic process
GO:0036211	174	BP	protein modification process
GO:0019538	169	BP	protein metabolic process
GO:0030301	168	BP	cholesterol transport
GO:0006639	168	BP	acylglycerol metabolic process
KEGG:00260	168	ke	Glycine, serine and threonine metabolism
GO:0006638	168	BP	neutral lipid metabolic process
GO:0015918	168	BP	sterol transport
GO:0055088	168	BP	lipid homeostasis
GO:0006066	167	BP	alcohol metabolic process
GO:0071941	167	BP	nitrogen cycle metabolic process
GO:0051180	167	BP	vitamin transport
GO:0008206	167	BP	bile acid metabolic process
GO:0042866	167	BP	pyruvate biosynthetic process
GO:0034754	167	BP	cellular hormone metabolic process
GO:0019439	167	BP	aromatic compound catabolic process
KEGG:00270	167	ke	Cysteine and methionine metabolism
KEGG:00100	167	ke	Steroid biosynthesis
GO:0019627	167	BP	urea metabolic process
GO:0015849	167	BP	organic acid transport
GO:0030195	167	BP	negative regulation of blood coagulation
GO:0050819	167	BP	negative regulation of coagulation
GO:0006776	167	BP	vitamin A metabolic process
GO:0006520	167	BP	cellular amino acid metabolic process
GO:0006569	167	BP	tryptophan catabolic process
GO:0050810	167	BP	regulation of steroid biosynthetic process
GO:1900046	167	BP	regulation of hemostasis
KEGG:04976	167	ke	Bile secretion
GO:0009064	167	BP	glutamine family amino acid metabolic process
GO:0050878	167	BP	regulation of body fluid levels
GO:0045540	167	BP	regulation of cholesterol biosynthetic process
GO:0006637	167	BP	acyl-CoA metabolic process
KEGG:00830	167	ke	Retinol metabolism
KEGG:00062	167	ke	Fatty acid elongation
GO:0006518	167	BP	peptide metabolic process
GO:0044272	167	BP	sulfur compound biosynthetic process
GO:0044262	167	BP	cellular carbohydrate metabolic process
GO:0000050	167	BP	urea cycle
GO:0030193	167	BP	regulation of blood coagulation
GO:0046164	167	BP	alcohol catabolic process
GO:0006576	167	BP	cellular biogenic amine metabolic process
GO:0008203	167	BP	cholesterol metabolic process
GO:0006694	167	BP	steroid biosynthetic process
KEGG:00250	167	ke	Alanine, aspartate and glutamate metabolism
KEGG:00120	167	ke	Primary bile acid biosynthesis
GO:0071827	167	BP	plasma lipoprotein particle organization
GO:0009071	167	BP	serine family amino acid catabolic process
GO:0052547	167	BP	regulation of peptidase activity
GO:0006725	167	BP	cellular aromatic compound metabolic process
GO:0006959	167	BP	humoral immune response
KEGG:00500	167	ke	Starch and sucrose metabolism
GO:0042632	167	BP	cholesterol homeostasis
KEGG:00040	167	ke	Pentose and glucuronate interconversions
GO:0042060	167	BP	wound healing
GO:0042559	167	BP	pteridine-containing compound biosynthetic process
GO:0042730	167	BP	fibrinolysis
GO:0015718	167	BP	monocarboxylic acid transport
GO:0008202	167	BP	steroid metabolic process
GO:0009075	167	BP	histidine family amino acid metabolic process
GO:0019441	167	BP	tryptophan catabolic process to kynurenine
GO:0042493	167	BP	response to drug
KEGG:01040	167	ke	Biosynthesis of unsaturated fatty acids
GO:0034369	167	BP	plasma lipoprotein particle remodeling
GO:0009308	167	BP	amine metabolic process
GO:0006855	167	BP	drug transmembrane transport
GO:0051917	167	BP	regulation of fibrinolysis
GO:0001676	167	BP	long-chain fatty acid metabolic process
GO:0051188	167	BP	cofactor biosynthetic process
GO:0046486	167	BP	glycerolipid metabolic process
GO:0050892	167	BP	intestinal absorption
GO:0000096	167	BP	sulfur amino acid metabolic process
GO:0006534	167	BP	cysteine metabolic process
GO:0010038	167	BP	response to metal ion
GO:0044092	167	BP	negative regulation of molecular function
GO:0035238	167	BP	vitamin A biosynthetic process
GO:0006572	167	BP	tyrosine catabolic process
GO:0006575	167	BP	cellular modified amino acid metabolic process
KEGG:00053	167	ke	Ascorbate and aldarate metabolism
KEGG:00591	167	ke	Linoleic acid metabolism
GO:0006558	167	BP	L-phenylalanine metabolic process
GO:0055092	167	BP	sterol homeostasis
KEGG:00983	167	ke	Drug metabolism - other enzymes
GO:0019216	167	BP	regulation of lipid metabolic process
GO:0009084	167	BP	glutamine family amino acid biosynthetic process
GO:0006081	167	BP	cellular aldehyde metabolic process
KEGG:00480	167	ke	Glutathione metabolism
GO:0019438	167	BP	aromatic compound biosynthetic process
GO:0006720	167	BP	isoprenoid metabolic process
GO:0042402	167	BP	cellular biogenic amine catabolic process
KEGG:00350	167	ke	Tyrosine metabolism
GO:0006957	167	BP	complement activation, alternative pathway
GO:0006699	167	BP	bile acid biosynthetic process
GO:0034367	167	BP	macromolecular complex remodeling
KEGG:00450	167	ke	Selenocompound metabolism
GO:0019363	167	BP	pyridine nucleotide biosynthetic process
KEGG:00232	167	ke	Caffeine metabolism
GO:0006570	167	BP	tyrosine metabolic process
GO:0019748	167	BP	secondary metabolic process
GO:0042445	167	BP	hormone metabolic process
GO:0002455	167	BP	humoral immune response mediated by circulating immunoglobulin
GO:0009069	167	BP	serine family amino acid metabolic process
GO:0071466	167	BP	cellular response to xenobiotic stimulus
KEGG:00380	167	ke	Tryptophan metabolism
KEGG:00514	167	ke	Other types of O-glycan biosynthesis
GO:0015711	167	BP	organic anion transport
GO:0006568	167	BP	tryptophan metabolic process
GO:0009725	167	BP	response to hormone stimulus
KEGG:00980	167	ke	Metabolism of xenobiotics by cytochrome P450
GO:0006775	167	BP	fat-soluble vitamin metabolic process
GO:0072525	167	BP	pyridine-containing compound biosynthetic process
GO:0030194	167	BP	positive regulation of blood coagulation
GO:0052548	167	BP	regulation of endopeptidase activity
GO:0005975	167	BP	carbohydrate metabolic process
GO:1900048	167	BP	positive regulation of hemostasis
GO:0046890	167	BP	regulation of lipid biosynthetic process
GO:0009063	167	BP	cellular amino acid catabolic process
KEGG:04975	167	ke	Fat digestion and absorption
GO:0009410	167	BP	response to xenobiotic stimulus
GO:0009074	167	BP	aromatic amino acid family catabolic process
GO:0042904	167	BP	9-cis-retinoic acid biosynthetic process
KEGG:00410	167	ke	beta-Alanine metabolism
GO:0042905	167	BP	9-cis-retinoic acid metabolic process
GO:0010565	167	BP	regulation of cellular ketone metabolic process
GO:0006805	167	BP	xenobiotic metabolic process
GO:0001523	167	BP	retinoid metabolic process
GO:0009077	167	BP	histidine family amino acid catabolic process
GO:0042558	167	BP	pteridine-containing compound metabolic process
GO:0000038	167	BP	very long-chain fatty acid metabolic process
GO:0044271	167	BP	cellular nitrogen compound biosynthetic process
KEGG:00140	167	ke	Steroid hormone biosynthesis
GO:0043604	167	BP	amide biosynthetic process
GO:0007596	167	BP	blood coagulation
KEGG:05150	167	ke	Staphylococcus aureus infection
GO:0006790	167	BP	sulfur compound metabolic process
GO:0009072	167	BP	aromatic amino acid family metabolic process
KEGG:00770	167	ke	Pantothenate and CoA biosynthesis
GO:0006548	167	BP	histidine catabolic process
KEGG:04977	167	ke	Vitamin digestion and absorption
GO:0010951	167	BP	negative regulation of endopeptidase activity
GO:0042573	167	BP	retinoic acid metabolic process
GO:0045940	167	BP	positive regulation of steroid metabolic process
GO:0016125	167	BP	sterol metabolic process
GO:0016126	167	BP	sterol biosynthetic process
GO:0006547	167	BP	histidine metabolic process
GO:0035383	167	BP	thioester metabolic process
GO:0072376	167	BP	protein activation cascade
GO:0042178	167	BP	xenobiotic catabolic process
GO:0046218	167	BP	indolalkylamine catabolic process
GO:0006641	167	BP	triglyceride metabolic process
GO:0070189	167	BP	kynurenine metabolic process
GO:0008299	167	BP	isoprenoid biosynthetic process
GO:0008209	167	BP	androgen metabolic process
GO:0043603	167	BP	cellular amide metabolic process
KEGG:04610	167	ke	Complement and coagulation cascades
GO:0006633	167	BP	fatty acid biosynthetic process
GO:0052695	167	BP	cellular glucuronidation
KEGG:00310	167	ke	Lysine degradation
GO:0006695	167	BP	cholesterol biosynthetic process
GO:0006536	167	BP	glutamate metabolic process
GO:0009698	167	BP	phenylpropanoid metabolic process
GO:0050818	167	BP	regulation of coagulation
GO:0070328	167	BP	triglyceride homeostasis
GO:0008610	167	BP	lipid biosynthetic process
GO:0010466	167	BP	negative regulation of peptidase activity
GO:0006958	167	BP	complement activation, classical pathway
GO:0071825	167	BP	protein-lipid complex subunit organization
GO:0009108	167	BP	coenzyme biosynthetic process
GO:0046889	167	BP	positive regulation of lipid biosynthetic process
GO:0044106	167	BP	cellular amine metabolic process
GO:0043086	167	BP	negative regulation of catalytic activity
GO:0016101	167	BP	diterpenoid metabolic process
GO:0042436	167	BP	indole-containing compound catabolic process
GO:0010876	167	BP	lipid localization
KEGG:00860	167	ke	Porphyrin and chlorophyll metabolism
GO:0044283	167	BP	small molecule biosynthetic process
GO:0016053	167	BP	organic acid biosynthetic process
GO:0031639	167	BP	plasminogen activation
KEGG:03320	167	ke	PPAR signaling pathway
KEGG:00982	167	ke	Drug metabolism - cytochrome P450
GO:0046394	167	BP	carboxylic acid biosynthetic process
GO:0009310	167	BP	amine catabolic process
GO:0015721	167	BP	bile acid and bile salt transport
GO:0051346	167	BP	negative regulation of hydrolase activity
GO:0050820	167	BP	positive regulation of coagulation
GO:0006559	167	BP	L-phenylalanine catabolic process
GO:0006956	167	BP	complement activation
GO:0006869	167	BP	lipid transport
GO:0046942	167	BP	carboxylic acid transport
KEGG:00590	167	ke	Arachidonic acid metabolism
GO:0050817	167	BP	coagulation
GO:1900047	167	BP	negative regulation of hemostasis
GO:0008652	167	BP	cellular amino acid biosynthetic process
GO:0071702	167	BP	organic substance transport
GO:0030162	167	BP	regulation of proteolysis
GO:0015893	167	BP	drug transport
KEGG:00330	167	ke	Arginine and proline metabolism
GO:0006544	167	BP	glycine metabolic process
GO:0006749	167	BP	glutathione metabolic process
GO:0051918	167	BP	negative regulation of fibrinolysis
GO:0006063	167	BP	uronic acid metabolic process
GO:0007599	167	BP	hemostasis
GO:0006766	167	BP	vitamin metabolic process
GO:0006730	167	BP	one-carbon metabolic process
GO:0006508	167	BP	proteolysis
GO:0051919	167	BP	positive regulation of fibrinolysis
GO:0017144	167	BP	drug metabolic process
GO:0045834	167	BP	positive regulation of lipid metabolic process
KEGG:00340	167	ke	Histidine metabolism
GO:0019585	167	BP	glucuronate metabolic process
GO:0006721	167	BP	terpenoid metabolic process
GO:0034368	167	BP	protein-lipid complex remodeling
GO:0090305	166	BP	nucleic acid phosphodiester bond hydrolysis
GO:0002376	151	BP	immune system process
KEGG:05340	151	ke	Primary immunodeficiency
GO:0022403	150	BP	cell cycle phase
GO:0000280	150	BP	nuclear division
GO:0051301	150	BP	cell division
GO:0000087	150	BP	M phase of mitotic cell cycle
GO:0000278	150	BP	mitotic cell cycle
GO:0007067	150	BP	mitosis
GO:0006310	150	BP	DNA recombination
GO:0048285	150	BP	organelle fission
GO:0022402	150	BP	cell cycle process
GO:0000279	150	BP	M phase
GO:0030217	150	BP	T cell differentiation
GO:0002694	147	BP	regulation of leukocyte activation
GO:0002682	147	BP	regulation of immune system process
GO:0001775	147	BP	cell activation
GO:0045321	147	BP	leukocyte activation
KEGG:03040	143	ke	Spliceosome
GO:0008380	138	BP	RNA splicing
GO:0016071	138	BP	mRNA metabolic process
GO:0033554	138	BP	cellular response to stress
GO:0006397	138	BP	mRNA processing
GO:0006396	138	BP	RNA processing
GO:0006915	138	BP	apoptotic process
GO:0045893	93	BP	positive regulation of transcription, DNA-dependent
GO:0006955	90	BP	immune response
GO:0006366	89	BP	transcription from RNA polymerase II promoter
GO:0010628	89	BP	positive regulation of gene expression
GO:0002562	89	BP	somatic diversification of immune receptors via germline recombination within a single locus
GO:0016444	89	BP	somatic cell DNA recombination
GO:0033151	89	BP	V(D)J recombination
GO:0007059	89	BP	chromosome segregation
GO:0006357	89	BP	regulation of transcription from RNA polymerase II promoter
KEGG:03450	89	ke	Non-homologous end-joining
GO:0002200	89	BP	somatic diversification of immune receptors
GO:0051249	86	BP	regulation of lymphocyte activation
GO:0002684	86	BP	positive regulation of immune system process
GO:0043547	86	BP	positive regulation of GTPase activity
KEGG:05414	80	ke	Dilated cardiomyopathy
KEGG:05410	80	ke	Hypertrophic cardiomyopathy (HCM)
KEGG:03013	77	ke	RNA transport
GO:0051028	77	BP	mRNA transport
GO:0009141	77	BP	nucleoside triphosphate metabolic process
GO:0043484	77	BP	regulation of RNA splicing
GO:0002768	77	BP	immune response-regulating cell surface receptor signaling pathway
GO:0000398	77	BP	nuclear mRNA splicing, via spliceosome
GO:0016032	77	BP	viral reproduction
GO:0002757	77	BP	immune response-activating signal transduction
GO:0022415	77	BP	viral reproductive process
GO:0022613	77	BP	ribonucleoprotein complex biogenesis
GO:0051169	77	BP	nuclear transport
GO:0071843	77	BP	cellular component biogenesis at cellular level
GO:0030183	77	BP	B cell differentiation
GO:0006406	77	BP	mRNA export from nucleus
GO:0050658	77	BP	RNA transport
GO:0016265	77	BP	death
GO:0002429	77	BP	immune response-activating cell surface receptor signaling pathway
GO:0008219	77	BP	cell death
GO:0015931	77	BP	nucleobase-containing compound transport
KEGG:05168	77	ke	Herpes simplex infection
GO:0050851	77	BP	antigen receptor-mediated signaling pathway
GO:0070230	77	BP	positive regulation of lymphocyte apoptotic process
GO:0000377	77	BP	RNA splicing, via transesterification reactions with bulged adenosine as nucleophile
GO:0034470	77	BP	ncRNA processing
KEGG:03008	77	ke	Ribosome biogenesis in eukaryotes
GO:0034660	77	BP	ncRNA metabolic process
GO:0042254	77	BP	ribosome biogenesis
GO:0051236	77	BP	establishment of RNA localization
GO:0000375	77	BP	RNA splicing, via transesterification reactions
GO:0006405	77	BP	RNA export from nucleus
GO:0012501	77	BP	programmed cell death
GO:0010212	77	BP	response to ionizing radiation
GO:0006913	77	BP	nucleocytoplasmic transport
GO:0050778	77	BP	positive regulation of immune response
GO:0006403	77	BP	RNA localization
GO:0006413	77	BP	translational initiation
GO:0048024	77	BP	regulation of nuclear mRNA splicing, via spliceosome
GO:0002764	77	BP	immune response-regulating signaling pathway
GO:0006364	77	BP	rRNA processing
GO:0050657	77	BP	nucleic acid transport
GO:0007159	77	BP	leukocyte cell-cell adhesion
GO:0007507	76	BP	heart development
GO:0016310	75	BP	phosphorylation
GO:0050790	75	BP	regulation of catalytic activity
GO:0051246	75	BP	regulation of protein metabolic process
GO:0010107	71	BP	potassium ion import
GO:0055013	71	BP	cardiac muscle cell development
GO:0009206	71	BP	purine ribonucleoside triphosphate biosynthetic process
GO:0044042	71	BP	glucan metabolic process
GO:0003231	71	BP	cardiac ventricle development
GO:0030048	71	BP	actin filament-based movement
GO:0090257	71	BP	regulation of muscle system process
GO:0048738	71	BP	cardiac muscle tissue development
GO:0006086	71	BP	acetyl-CoA biosynthetic process from pyruvate
GO:0009145	71	BP	purine nucleoside triphosphate biosynthetic process
GO:0003013	71	BP	circulatory system process
GO:0007512	71	BP	adult heart development
GO:0055007	71	BP	cardiac muscle cell differentiation
GO:0030239	71	BP	myofibril assembly
GO:0006073	71	BP	cellular glucan metabolic process
KEGG:00190	71	ke	Oxidative phosphorylation
GO:0006734	71	BP	NADH metabolic process
GO:0022904	71	BP	respiratory electron transport chain
GO:0006936	71	BP	muscle contraction
KEGG:05412	71	ke	Arrhythmogenic right ventricular cardiomyopathy (ARVC)
GO:0003208	71	BP	cardiac ventricle morphogenesis
GO:0006754	71	BP	ATP biosynthetic process
KEGG:04260	71	ke	Cardiac muscle contraction
GO:0015986	71	BP	ATP synthesis coupled proton transport
GO:0055001	71	BP	muscle cell development
GO:0030049	71	BP	muscle filament sliding
GO:0009260	71	BP	ribonucleotide biosynthetic process
GO:0046365	71	BP	monosaccharide catabolic process
KEGG:05012	71	ke	Parkinson's disease
GO:0048747	71	BP	muscle fiber development
GO:0014706	71	BP	striated muscle tissue development
GO:0070296	71	BP	sarcoplasmic reticulum calcium ion transport
GO:0009060	71	BP	aerobic respiration
GO:0009109	71	BP	coenzyme catabolic process
GO:0042692	71	BP	muscle cell differentiation
GO:0009185	71	BP	ribonucleoside diphosphate metabolic process
GO:0006941	71	BP	striated muscle contraction
GO:0003229	71	BP	ventricular cardiac muscle tissue development
GO:0009201	71	BP	ribonucleoside triphosphate biosynthetic process
GO:0046496	71	BP	nicotinamide nucleotide metabolic process
GO:0055010	71	BP	ventricular cardiac muscle tissue morphogenesis
GO:0035051	71	BP	cardiac cell differentiation
GO:0006102	71	BP	isocitrate metabolic process
GO:0055003	71	BP	cardiac myofibril assembly
KEGG:05010	71	ke	Alzheimer's disease
GO:0008016	71	BP	regulation of heart contraction
GO:0060047	71	BP	heart contraction
GO:0033275	71	BP	actin-myosin filament sliding
GO:0060415	71	BP	muscle tissue morphogenesis
GO:0019674	71	BP	NAD metabolic process
GO:0061061	71	BP	muscle structure development
GO:0006099	71	BP	tricarboxylic acid cycle
GO:0003206	71	BP	cardiac chamber morphogenesis
GO:0003012	71	BP	muscle system process
GO:0006733	71	BP	oxidoreduction coenzyme metabolic process
GO:0003007	71	BP	heart morphogenesis
GO:0010880	71	BP	regulation of release of sequestered calcium ion into cytosol by sarcoplasmic reticulum
GO:0016052	71	BP	carbohydrate catabolic process
GO:0009142	71	BP	nucleoside triphosphate biosynthetic process
GO:0051146	71	BP	striated muscle cell differentiation
GO:0006937	71	BP	regulation of muscle contraction
GO:0009152	71	BP	purine ribonucleotide biosynthetic process
GO:0006096	71	BP	glycolysis
GO:0055008	71	BP	cardiac muscle tissue morphogenesis
GO:0003015	71	BP	heart process
GO:0055006	71	BP	cardiac cell development
GO:0070252	71	BP	actin-mediated cell contraction
KEGG:05016	71	ke	Huntington's disease
GO:0006085	71	BP	acetyl-CoA biosynthetic process
GO:0045214	71	BP	sarcomere organization
KEGG:00020	71	ke	Citrate cycle (TCA cycle)
KEGG:04910	71	ke	Insulin signaling pathway
GO:0014808	71	BP	release of sequestered calcium ion into cytosol by sarcoplasmic reticulum
GO:0006084	71	BP	acetyl-CoA metabolic process
GO:0015985	71	BP	energy coupled proton transport, down electrochemical gradient
GO:0006942	71	BP	regulation of striated muscle contraction
GO:0007517	71	BP	muscle organ development
GO:0060048	71	BP	cardiac muscle contraction
GO:0008015	71	BP	blood circulation
GO:0046356	71	BP	acetyl-CoA catabolic process
GO:0006007	71	BP	glucose catabolic process
GO:0051187	71	BP	cofactor catabolic process
GO:0055002	71	BP	striated muscle cell development
GO:0048644	71	BP	muscle organ morphogenesis
GO:0009133	71	BP	nucleoside diphosphate biosynthetic process
GO:0019320	71	BP	hexose catabolic process
GO:0006103	71	BP	2-oxoglutarate metabolic process
GO:0015980	71	BP	energy derivation by oxidation of organic compounds
GO:0009188	71	BP	ribonucleoside diphosphate biosynthetic process
GO:0045333	71	BP	cellular respiration
GO:0003205	71	BP	cardiac chamber development
KEGG:05166	70	ke	HTLV-I infection
GO:0002250	70	BP	adaptive immune response
GO:0008283	66	BP	cell proliferation
GO:0008284	66	BP	positive regulation of cell proliferation
GO:0031399	66	BP	regulation of protein modification process
GO:0031325	66	BP	positive regulation of cellular metabolic process
GO:0009893	66	BP	positive regulation of metabolic process
GO:0048523	66	BP	negative regulation of cellular process
GO:0006468	66	BP	protein phosphorylation
GO:0048519	66	BP	negative regulation of biological process
GO:0010604	66	BP	positive regulation of macromolecule metabolic process
KEGG:05222	62	ke	Small cell lung cancer
GO:0010564	61	BP	regulation of cell cycle process
GO:0007051	61	BP	spindle organization
GO:0043543	61	BP	protein acylation
GO:0051726	61	BP	regulation of cell cycle
GO:0051321	61	BP	meiotic cell cycle
GO:0043966	61	BP	histone H3 acetylation
GO:0000236	61	BP	mitotic prometaphase
GO:0051235	61	BP	maintenance of location
GO:0007088	61	BP	regulation of mitosis
GO:0034502	61	BP	protein localization to chromosome
GO:0007346	61	BP	regulation of mitotic cell cycle
GO:0006260	61	BP	DNA replication
GO:0051299	61	BP	centrosome separation
GO:0006323	61	BP	DNA packaging
GO:0071173	61	BP	spindle assembly checkpoint
GO:0007098	61	BP	centrosome cycle
GO:0006333	61	BP	chromatin assembly or disassembly
GO:0045859	61	BP	regulation of protein kinase activity
GO:0018205	61	BP	peptidyl-lysine modification
GO:0051439	61	BP	regulation of ubiquitin-protein ligase activity involved in mitotic cell cycle
GO:0000724	61	BP	double-strand break repair via homologous recombination
KEGG:03410	61	ke	Base excision repair
GO:0009411	61	BP	response to UV
GO:0031577	61	BP	spindle checkpoint
GO:0002520	61	BP	immune system development
GO:0032886	61	BP	regulation of microtubule-based process
GO:0048610	61	BP	cellular process involved in reproduction
GO:0000003	61	BP	reproduction
GO:0007080	61	BP	mitotic metaphase plate congression
KEGG:03030	61	ke	DNA replication
GO:0051984	61	BP	positive regulation of chromosome segregation
GO:0006950	61	BP	response to stress
GO:0010605	61	BP	negative regulation of macromolecule metabolic process
GO:0000090	61	BP	mitotic anaphase
GO:0045185	61	BP	maintenance of protein location
GO:0033043	61	BP	regulation of organelle organization
KEGG:04110	61	ke	Cell cycle
KEGG:04660	61	ke	T cell receptor signaling pathway
GO:0006301	61	BP	postreplication repair
GO:0030261	61	BP	chromosome condensation
GO:0009892	61	BP	negative regulation of metabolic process
GO:0007062	61	BP	sister chromatid cohesion
GO:0050000	61	BP	chromosome localization
GO:0031570	61	BP	DNA integrity checkpoint
KEGG:04914	61	ke	Progesterone-mediated oocyte maturation
GO:0007052	61	BP	mitotic spindle organization
GO:0044265	61	BP	cellular macromolecule catabolic process
KEGG:04115	61	ke	p53 signaling pathway
GO:0007126	61	BP	meiosis
GO:0022414	61	BP	reproductive process
GO:0034453	61	BP	microtubule anchoring
GO:0000079	61	BP	regulation of cyclin-dependent protein kinase activity
GO:0016570	61	BP	histone modification
GO:0051329	61	BP	interphase of mitotic cell cycle
GO:0000725	61	BP	recombinational repair
GO:0051327	61	BP	M phase of meiotic cell cycle
GO:0051783	61	BP	regulation of nuclear division
GO:0000077	61	BP	DNA damage checkpoint
GO:0043549	61	BP	regulation of kinase activity
GO:0045786	61	BP	negative regulation of cell cycle
GO:0006302	61	BP	double-strand break repair
GO:0070925	61	BP	organelle assembly
GO:0007050	61	BP	cell cycle arrest
GO:0007100	61	BP	mitotic centrosome separation
GO:0030097	61	BP	hemopoiesis
GO:0006200	61	BP	ATP catabolic process
GO:0032507	61	BP	maintenance of protein location in cell
GO:0051322	61	BP	anaphase
GO:0010948	61	BP	negative regulation of cell cycle process
GO:0000086	61	BP	G2/M transition of mitotic cell cycle
GO:0000910	61	BP	cytokinesis
GO:0051338	61	BP	regulation of transferase activity
GO:0034621	61	BP	cellular macromolecular complex subunit organization
GO:0006268	61	BP	DNA unwinding involved in replication
GO:0000075	61	BP	cell cycle checkpoint
GO:0009314	61	BP	response to radiation
GO:0071103	61	BP	DNA conformation change
GO:0051298	61	BP	centrosome duplication
GO:0070647	61	BP	protein modification by small protein conjugation or removal
GO:0007091	61	BP	mitotic metaphase/anaphase transition
KEGG:03420	61	ke	Nucleotide excision repair
GO:0000226	61	BP	microtubule cytoskeleton organization
GO:0051297	61	BP	centrosome organization
GO:0016567	61	BP	protein ubiquitination
GO:0032446	61	BP	protein modification by small protein conjugation
KEGG:03440	61	ke	Homologous recombination
GO:0051052	61	BP	regulation of DNA metabolic process
GO:0051310	61	BP	metaphase plate congression
GO:0046034	61	BP	ATP metabolic process
KEGG:03460	61	ke	Fanconi anemia pathway
GO:0051303	61	BP	establishment of chromosome localization
KEGG:03430	61	ke	Mismatch repair
GO:0045934	61	BP	negative regulation of nucleobase-containing compound metabolic process
GO:0012502	61	BP	induction of programmed cell death
GO:0031023	61	BP	microtubule organizing center organization
GO:0051651	61	BP	maintenance of location in cell
GO:0006473	61	BP	protein acetylation
GO:0007093	61	BP	mitotic cell cycle checkpoint
GO:0051325	61	BP	interphase
GO:0016569	61	BP	covalent chromatin modification
GO:0007010	61	BP	cytoskeleton organization
KEGG:00240	61	ke	Pyrimidine metabolism
GO:0007017	61	BP	microtubule-based process
GO:0006917	61	BP	induction of apoptosis
GO:0006261	61	BP	DNA-dependent DNA replication
GO:0006270	61	BP	DNA-dependent DNA replication initiation
GO:0000082	61	BP	G1/S transition of mitotic cell cycle
GO:0070507	61	BP	regulation of microtubule cytoskeleton organization
GO:0071156	61	BP	regulation of cell cycle arrest
KEGG:05162	61	ke	Measles
GO:0048534	61	BP	hemopoietic or lymphoid organ development
GO:0033036	22	BP	macromolecule localization
GO:0030036	18	BP	actin cytoskeleton organization
GO:0030029	18	BP	actin filament-based process
GO:0010627	18	BP	regulation of intracellular protein kinase cascade
GO:0009062	16	BP	fatty acid catabolic process
GO:0006635	16	BP	fatty acid beta-oxidation
GO:0009081	16	BP	branched chain family amino acid metabolic process
GO:0009083	16	BP	branched chain family amino acid catabolic process
KEGG:00280	16	ke	Valine, leucine and isoleucine degradation
GO:0043085	14	BP	positive regulation of catalytic activity
GO:0000165	14	BP	MAPK cascade
GO:0051345	14	BP	positive regulation of hydrolase activity
GO:0043408	14	BP	regulation of MAPK cascade
GO:0070887	14	BP	cellular response to chemical stimulus
KEGG:04144	14	ke	Endocytosis
GO:0016477	14	BP	cell migration
GO:0051336	14	BP	regulation of hydrolase activity
GO:0044093	14	BP	positive regulation of molecular function
GO:0071310	14	BP	cellular response to organic substance
GO:0007243	13	BP	intracellular protein kinase cascade
KEGG:04650	9	ke	Natural killer cell mediated cytotoxicity
GO:0033124	9	BP	regulation of GTP catabolic process
KEGG:04064	9	ke	NF-kappa B signaling pathway
GO:0046907	9	BP	intracellular transport
GO:0007265	9	BP	Ras protein signal transduction
GO:0002252	9	BP	immune effector process
KEGG:04210	9	ke	Apoptosis
GO:0002819	9	BP	regulation of adaptive immune response
GO:0043087	9	BP	regulation of GTPase activity
GO:0019882	9	BP	antigen processing and presentation
GO:0042981	9	BP	regulation of apoptotic process
GO:0002822	9	BP	regulation of adaptive immune response based on somatic recombination of immune receptors built from immunoglobulin superfamily domains
GO:0002460	9	BP	adaptive immune response based on somatic recombination of immune receptors built from immunoglobulin superfamily domains
GO:0048584	9	BP	positive regulation of response to stimulus
GO:0030811	9	BP	regulation of nucleotide catabolic process
GO:0034097	9	BP	response to cytokine stimulus
GO:0071345	9	BP	cellular response to cytokine stimulus
GO:0050865	9	BP	regulation of cell activation
GO:0046578	9	BP	regulation of Ras protein signal transduction
GO:0016311	9	BP	dephosphorylation
GO:0010941	9	BP	regulation of cell death
KEGG:05332	9	ke	Graft-versus-host disease
KEGG:04672	9	ke	Intestinal immune network for IgA production
GO:0050776	9	BP	regulation of immune response
KEGG:04621	9	ke	NOD-like receptor signaling pathway
GO:0033121	9	BP	regulation of purine nucleotide catabolic process
GO:0019221	9	BP	cytokine-mediated signaling pathway
GO:0051056	9	BP	regulation of small GTPase mediated signal transduction
KEGG:05330	9	ke	Allograft rejection
KEGG:04810	9	ke	Regulation of actin cytoskeleton
GO:0007266	9	BP	Rho protein signal transduction
GO:0002697	9	BP	regulation of immune effector process
GO:0009617	8	BP	response to bacterium
GO:0042742	8	BP	defense response to bacterium
KEGG:04141	8	ke	Protein processing in endoplasmic reticulum
KEGG:00510	7	ke	N-Glycan biosynthesis
GO:0001525	5	BP	angiogenesis
GO:0008360	5	BP	regulation of cell shape
GO:0048010	5	BP	vascular endothelial growth factor receptor signaling pathway
GO:0030336	5	BP	negative regulation of cell migration
GO:0030857	5	BP	negative regulation of epithelial cell differentiation
GO:0001568	5	BP	blood vessel development
GO:0045937	5	BP	positive regulation of phosphate metabolic process
GO:0007229	5	BP	integrin-mediated signaling pathway
GO:0023056	5	BP	positive regulation of signaling
GO:0001666	5	BP	response to hypoxia
GO:0001934	5	BP	positive regulation of protein phosphorylation
GO:0018193	5	BP	peptidyl-amino acid modification
KEGG:05200	5	ke	Pathways in cancer
GO:0032270	5	BP	positive regulation of cellular protein metabolic process
GO:0050678	5	BP	regulation of epithelial cell proliferation
GO:0010562	5	BP	positive regulation of phosphorus metabolic process
GO:0048513	5	BP	organ development
GO:0045765	5	BP	regulation of angiogenesis
GO:0042127	5	BP	regulation of cell proliferation
GO:2000147	5	BP	positive regulation of cell motility
GO:0007435	5	BP	salivary gland morphogenesis
GO:0050793	5	BP	regulation of developmental process
GO:0071363	5	BP	cellular response to growth factor stimulus
GO:0048144	5	BP	fibroblast proliferation
GO:0035295	5	BP	tube development
GO:0060429	5	BP	epithelium development
GO:0032268	5	BP	regulation of cellular protein metabolic process
GO:0019220	5	BP	regulation of phosphate metabolic process
GO:0048875	5	BP	chemical homeostasis within a tissue
KEGG:04512	5	ke	ECM-receptor interaction
GO:0010594	5	BP	regulation of endothelial cell migration
GO:0048754	5	BP	branching morphogenesis of a tube
GO:0042325	5	BP	regulation of phosphorylation
GO:0050673	5	BP	epithelial cell proliferation
GO:0060541	5	BP	respiratory system development
GO:2000145	5	BP	regulation of cell motility
GO:0051270	5	BP	regulation of cellular component movement
GO:0051674	5	BP	localization of cell
GO:0001944	5	BP	vasculature development
KEGG:04510	5	ke	Focal adhesion
GO:0035924	5	BP	cellular response to vascular endothelial growth factor stimulus
GO:0009605	5	BP	response to external stimulus
GO:0042327	5	BP	positive regulation of phosphorylation
GO:0051174	5	BP	regulation of phosphorus metabolic process
GO:0009887	5	BP	organ morphogenesis
GO:0051247	5	BP	positive regulation of protein metabolic process
GO:0030324	5	BP	lung development
GO:0043010	5	BP	camera-type eye development
GO:0007431	5	BP	salivary gland development
GO:0072001	5	BP	renal system development
GO:0050896	5	BP	response to stimulus
GO:0043281	5	BP	regulation of cysteine-type endopeptidase activity involved in apoptotic process
GO:0031589	5	BP	cell-substrate adhesion
GO:0022603	5	BP	regulation of anatomical structure morphogenesis
GO:0048732	5	BP	gland development
GO:0018212	5	BP	peptidyl-tyrosine modification
KEGG:05100	5	ke	Bacterial invasion of epithelial cells
GO:0090287	5	BP	regulation of cellular response to growth factor stimulus
GO:0048870	5	BP	cell motility
GO:0072359	5	BP	circulatory system development
GO:0002009	5	BP	morphogenesis of an epithelium
KEGG:04670	5	ke	Leukocyte transendothelial migration
GO:0048646	5	BP	anatomical structure formation involved in morphogenesis
GO:0001822	5	BP	kidney development
GO:0010033	5	BP	response to organic substance
GO:0051093	5	BP	negative regulation of developmental process
GO:0040013	5	BP	negative regulation of locomotion
GO:0048729	5	BP	tissue morphogenesis
GO:0010647	5	BP	positive regulation of cell communication
GO:0030335	5	BP	positive regulation of cell migration
GO:0070848	5	BP	response to growth factor stimulus
GO:0007169	5	BP	transmembrane receptor protein tyrosine kinase signaling pathway
GO:0051272	5	BP	positive regulation of cellular component movement
GO:2000146	5	BP	negative regulation of cell motility
GO:0045596	5	BP	negative regulation of cell differentiation
GO:0002040	5	BP	sprouting angiogenesis
GO:0034329	5	BP	cell junction assembly
GO:0009967	5	BP	positive regulation of signal transduction
GO:0022612	5	BP	gland morphogenesis
GO:0030323	5	BP	respiratory tube development
GO:0051716	5	BP	cellular response to stimulus
GO:0035239	5	BP	tube morphogenesis
GO:0001763	5	BP	morphogenesis of a branching structure
GO:0038084	5	BP	vascular endothelial growth factor signaling pathway
GO:0043062	5	BP	extracellular structure organization
GO:0040017	5	BP	positive regulation of locomotion
GO:0030198	5	BP	extracellular matrix organization
GO:0010595	5	BP	positive regulation of endothelial cell migration
GO:0043129	5	BP	surfactant homeostasis
GO:0001932	5	BP	regulation of protein phosphorylation
GO:0008285	5	BP	negative regulation of cell proliferation
GO:0043542	5	BP	endothelial cell migration
GO:0051094	5	BP	positive regulation of developmental process
GO:0030334	5	BP	regulation of cell migration
GO:0072358	5	BP	cardiovascular system development
GO:0048286	5	BP	lung alveolus development
GO:0048514	5	BP	blood vessel morphogenesis
GO:0007167	5	BP	enzyme linked receptor protein signaling pathway
GO:0009888	5	BP	tissue development
GO:0018108	5	BP	peptidyl-tyrosine phosphorylation
GO:0001655	5	BP	urogenital system development
KEGG:04520	5	ke	Adherens junction
GO:0045766	5	BP	positive regulation of angiogenesis
GO:0031401	5	BP	positive regulation of protein modification process
GO:0048585	5	BP	negative regulation of response to stimulus
GO:0034330	5	BP	cell junction organization
GO:0040012	5	BP	regulation of locomotion
GO:0006952	4	BP	defense response
GO:0045087	4	BP	innate immune response
GO:0002365	4	BP	gamma-delta T cell lineage commitment
GO:0030041	4	BP	actin filament polymerization
KEGG:04666	4	ke	Fc gamma R-mediated phagocytosis
GO:0002224	4	BP	toll-like receptor signaling pathway
GO:0044085	4	BP	cellular component biogenesis
GO:0032970	4	BP	regulation of actin filament-based process
KEGG:00051	4	ke	Fructose and mannose metabolism
KEGG:05220	4	ke	Chronic myeloid leukemia
GO:0051254	4	BP	positive regulation of RNA metabolic process
GO:0043254	4	BP	regulation of protein complex assembly
GO:0031347	4	BP	regulation of defense response
KEGG:05140	4	ke	Leishmaniasis
GO:0080134	4	BP	regulation of response to stress
GO:0031349	4	BP	positive regulation of defense response
KEGG:05132	4	ke	Salmonella infection
GO:0060562	3	BP	epithelial tube morphogenesis
KEGG:00230	3	ke	Purine metabolism
KEGG:04614	2	ke	Renin-angiotensin system
GO:0046503	1	BP	glycerolipid catabolic process
GO:0097006	1	BP	regulation of plasma lipoprotein particle levels
GO:0032374	1	BP	regulation of cholesterol transport
KEGG:00670	1	ke	One carbon pool by folate
GO:0060191	1	BP	regulation of lipase activity
GO:0032372	1	BP	negative regulation of sterol transport
GO:0046464	1	BP	acylglycerol catabolic process
GO:0042157	1	BP	lipoprotein metabolic process
GO:0006497	1	BP	protein lipidation
GO:0015914	1	BP	phospholipid transport
GO:0033344	1	BP	cholesterol efflux
GO:0032369	1	BP	negative regulation of lipid transport
GO:0046461	1	BP	neutral lipid catabolic process
GO:0050996	1	BP	positive regulation of lipid catabolic process
GO:0032375	1	BP	negative regulation of cholesterol transport
GO:0033700	1	BP	phospholipid efflux
GO:0006545	1	BP	glycine biosynthetic process
GO:0034381	1	BP	plasma lipoprotein particle clearance
GO:0009395	1	BP	phospholipid catabolic process
GO:0045833	1	BP	negative regulation of lipid metabolic process
GO:0034384	1	BP	high-density lipoprotein particle clearance
GO:0050994	1	BP	regulation of lipid catabolic process
GO:0032371	1	BP	regulation of sterol transport
GO:0032368	1	BP	regulation of lipid transport
GO:0031058	1	BP	positive regulation of histone modification
GO:0042158	1	BP	lipoprotein biosynthetic process
GO:0002051	1	BP	osteoblast fate commitment
GO:0034261	1	BP	negative regulation of Ras GTPase activity
