# Supplementary material for: Comprehensive Characterization of 10,571 Mouse Large Intergenic Noncoding RNAs from Whole Transcriptome Sequencing
Source: PLoS One. 2013 Aug 12;8(8):e70835. doi: 10.1371/journal.pone.0070835 (PMC3741367; doi:10.1371/journal.pone.0070835)
Supplement: Table S1 — Sample information and RNA-Seq statistics. (XLS) [file pone.0070835.s006.xls]

## Sheet: Sheet1
Tissue	SampleID	Total reads	Mapped reads	Mappping Ratio (%)	Splice Junction Reads	Splice Mapping ratio (%)
Liver1	ERR032203	57297252	37005602	64.59	8454582	22.85
Liver2	ERR032204	59918034	41123273	68.63	9844586	23.94
Liver3	ERR032205	58603874	45389156	77.45	10503253	23.14
Liver4	ERR032206	61592066	51385394	83.43	11437090	22.26
Liver5	ERR032207	62642480	50046366	79.89	11714118	23.41
Liver6	ERR032208	62779274	48985054	78.03	11163227	22.79
Spleen1	ERR032209	44097860	26714803	60.58	2582881	9.67
Spleen2	ERR032210	50375570	34312766	68.11	4824089	14.06
Spleen3	ERR032211	48425156	36496994	75.37	5475177	15
Spleen4	ERR032212	34592596	21453433	62.02	3272488	15.25
Spleen5	ERR032213	63783426	48308472	75.74	5771113	11.95
Spleen6	ERR032214	51238436	42879565	83.69	4582657	10.69
Thymus1	ERR032215	66177258	56455340	85.31	8449751	14.97
Thymus2	ERR032216	68363858	58238653	85.19	8288557	14.23
Thymus3	ERR032217	68881730	58047086	84.27	8283866	14.27
Thymus4	ERR032218	71280434	60507253	84.89	8939852	14.77
Thymus5	ERR032219	69833302	58475463	83.74	6744455	11.53
Thymus6	ERR032220	71536526	62925883	87.96	9578171	15.22
Lung1	ERR032221	23487654	16550671	70.47	2322746	14.03
Lung2	ERR032222	51640314	39660070	76.8	7644270	19.27
Lung3	ERR032223	46554340	35350992	75.93	6916865	19.57
Lung4	ERR032224	24136474	21948671	90.94	3578753	16.31
Lung5	ERR032225	56836524	43330285	76.24	7818933	18.04
Lung6	ERR032226	36652374	31349804	85.53	5654982	18.04
Heart1	ERR032227	62001474	51757030	83.48	8044650	15.54
Heart2	ERR032228	17211336	15251721	88.61	1055994	6.92
Heart3	ERR032229	60150468	51460002	85.55	8036243	15.62
Heart4	ERR032238	58996754	53722893	91.06	6600145	12.29
Heart5	ERR032230	55648732	44729299	80.38	6481714	14.49
Heart6	ERR032231	62321578	50611187	81.21	8100182	16
Hippocampus1	ERR032232	37508026	33408478	89.07	5465990	16.36
Hippocampus2	ERR032233	67200888	58748149	87.42	8234405	14.02
Hippocampus3	ERR032234	47627010	42065044	88.32	7789800	18.52
Hippocampus4	ERR032235	46479614	41367747	89	5948106	14.38
Hippocampus5	ERR032236	45236904	39670737	87.7	6432816	16.22
Hippocampus6	ERR032237	65341310	56518937	86.5	7723064	13.66
Total	36	1936450906	1442734242	74.5	224957150	15.59
