# Supplementary material for: Comprehensive Characterization of 10,571 Mouse Large Intergenic Noncoding RNAs from Whole Transcriptome Sequencing
Source: PLoS One. 2013 Aug 12;8(8):e70835. doi: 10.1371/journal.pone.0070835 (PMC3741367; doi:10.1371/journal.pone.0070835)
Supplement: Table S2 — All the annotated coding, non-coding and pseudogenes resource. (XLS) [file pone.0070835.s007.xls]

## Sheet: Sheet1
Dataset name	Downloaded from (date)	Number of transcripts	Note
RefSeq Protein coding genes	The UCSC genome browser; NCBI37/mm9 (July 2007)	26211	Extracted only transcripts with ID beginning with NM_
UCSC coding genes	The UCSC genome browser; NCBI37/mm9 (July 2007) ,The kgTxInfo primary table	48223	Extracted transcripts annotated as coding
Ensembl coding genes	Biomart Ensembl NCBI37/mm9 (July 2007;Ensembl Release 46)	91868	Extracted transcripts annotated as coding
Vega coding genes	The UCSC genome browser; NCBI37/mm9 (July 2007)	49195	Extracted transcripts annotated as coding
Pseudogenes set1	The UCSC genome browser; NCBI37/mm9 (July 2007；Vega Release )	303
Pseudogenes set2	From : http://pseudogenes.org/ (July 2010 ; build60)	19119
NONCODE non-coding genes	From http://www.noncode.org/ (NONCODE V 3.0)	36991	lncRNA_mouse.zip
